# Supplementary material for: Assembly and comparative analysis of the complete mitochondrial genome of Suaeda glauca
Source: Research Square preprint supplement (doi:10.21203/rs.3.rs-112827/v1), 2020-11-24
Supplement: Supplementary file 1 [file bcce32d493028dc2b4d4e760.docx]

LOCUS Suaeda-glauca 474330 bp DNA circular 29-SEP-2020

DEFINITION Suaeda-glauca mitochondrion

ACCESSION Suaeda-glauca

SOURCE mitochondrion Suaeda-glauca

ORGANISM Suaeda-glauca

Suaeda-glauca;

REFERENCE 1 (bases 1 to 474330)

AUTHORS Tillich,M., Lehwark,P., Pellizzer,T., Ulbricht-Jones, E.S.,

Fischer, A., Bock, R. and Greiner,S.

TITLE GeSeq - versatile and accurate annotation of organelle genomes

JOURNAL Nucleic Acids Res. 45 (W1), W6-W11 (2017)

PUBMED 28486635

COMMENT GeSeq Version 1.84

Job GeSeqJob-20200902-174912

Subjob Suaeda-salsa

Creator anonymous

Program BLAT v36x7

blatxcutoff=25 blatncutoff=85

blatxmaxintron=750000 blatnmaxintron=0

annotate_ir=false shortmatches=false

mpimpchlororefset=false

ncbirefs=NC_017855.1, NC_037304.1, NC_020455.1,

NC_029317.1, NC_035618.1, NC_008285.1, NC_041093.1,

NC_006581.1

Program HMMER 3.3.1 disabled

Program ARAGORN v1.2.38

gcode=gcchloroph maxintronlen=3000

intronoverlap=true fixintron=true

lowscoring=false circular=true

Program ARWEN v1.2.3 disabled

Program MFannot v1.34 disabled

Program Chloë v0.1.0 disabled

Program tRNAscan-SE v1.3.1 disabled

Program tRNAscan-SE v2.0.6 disabled

Program RNA Editing disabled

Submitted 29 Sep 2020 09:49:18 GMT

Started 29 Sep 2020 09:49:34 GMT

Finished 29 Sep 2020 09:49:39 GMT

FEATURES Location/Qualifiers

source 1..474330

/organism="Suaeda-glauca"

/organelle="mitochondrion"

/mol_type="genomic DNA"

gene complement(24025..25594)

/gene="cox1"

/info="blatX_hit cox1_NC_041093.1, position 1 - 1570, psl

score 98.3, coverage 99.68%, match 97.97%"

/annotator="blatX"

CDS complement(24025..25594)

/gene="cox1"

/annotator="blatX"

gene complement(26893..26966)

/gene="trnM-CAU "

/info="blatN_hit trnfM-CAU_NC_006581.1, position 1 - 74,

psl score 91.9, coverage 100.00%, match 91.89%; blatN_hit

trnfM-CAT_NC_020455.1, position 1 - 74, psl score 93.3,

coverage 100.00%, match 93.24%; blatN_hit

trnM-CAU_NC_035618.1, position 1 - 74, psl score 100.0,

coverage 100.00%, match 100.00%; blatN_hit

trnM_NC_041093.1, position 1 - 74, psl score 100.0,

coverage 100.00%, match 100.00%; merged"

/annotator="blatN"

tRNA complement(26893..26966)

/gene="trnM-CAU "

/annotator="blatN"

gene complement(36034..36106)

/gene="trnK-UUU"

/info="annotated by ARAGORN v1.2.38, score: 122.7;

blatN_hit trnK-TTT_NC_020455.1, position 1 - 73, psl

score 100.0, coverage 100.00%, match 100.00%; blatN_hit

trnK-UUU_NC_037304.1, position 1 - 73, psl score 100.0,

coverage 100.00%, match 100.00%; blatN_hit

trnK_NC_041093.1, position 1 - 73, psl score 100.0,

coverage 100.00%, match 100.00%; merged"

/annotator="ARAGORN, blatN; merged"

tRNA complement(36034..36106)

/gene="trnK-UUU "

/annotator="ARAGORN, blatN; merged"

/annotator="blatN"

gene 47317..48683

/gene="rrnL"

/info="blatN_hit rrnL_NC_035618.1, position 1988 - 3354,

psl score 100.0, coverage 40.76%, match 40.76%"

/annotator="blatN"

rRNA 47317..48683

/gene="rrnL"

/annotator="blatN"

gene 49061..49134

/gene="trnM-CAU"

/info="blatN_hit trnfM-CAU_NC_006581.1, position 1 - 74,

psl score 91.9, coverage 100.00%, match 91.89%; blatN_hit

trnfM-CAT_NC_020455.1, position 1 - 74, psl score 93.3,

coverage 100.00%, match 93.24%; blatN_hit

trnM-CAU_NC_035618.1, position 1 - 74, psl score 100.0,

coverage 100.00%, match 100.00%; blatN_hit

trnM_NC_041093.1, position 1 - 74, psl score 100.0,

coverage 100.00%, match 100.00%; merged"

/annotator="blatN"

tRNA 49061..49134

/gene="trnM-CAU"

/annotator="blatN"

gene 49312..54991

/gene="nad7"

/info="blatX_hit nad7_NC_041093.1, position 1 - 1092, psl

score 97.0, coverage 100.00%, match 100.00%"

/annotator="blatX"

CDS join(49312..49361,50286..50354,51282..51747,52825..53068,

54729..54991)

/gene="nad7"

/annotator="blatX"

/translation="MNGEVVERAEPHIGLLHRGTEKLIEYKTYLQALPYFDRLDYVSM

MAQEHAHSSAVERLLNCEVPLRAQYIRVLFREITRISNHSLALTTHAMDVGALTPFLW

AFEEREKLLEFYERVPGARMHASFIRPGGVAQDLPLGLCRDIDSSTQQFASRIDELEE

MSTGNRIWKQRLVDIGTVTAQQAKDWGFSGVMLRGPGVCWDLRRAAPYDVYDQLDFDV

PVGTRGDRYDRYCIRIEEMRQSVRIIVQCLNQMPSGMIKADDRKLCPPSRYRMKLSME

SSIHHFEPYTEGFSVPAPSTYTAVEAPKGEFGVFLVSNGSNRPYRRKIRAPGSAHSQG

LDSMSKHHMPADVVTIIGTQDIVSGEVDR"

exon 49312..49361

/gene="nad7"

/annotator="blatX"

/number=1

intron 49362..50285

/gene="nad7"

/annotator="blatX"

/number=1

exon 50286..50354

/gene="nad7"

/annotator="blatX"

/number=2

intron 50355..51281

/gene="nad7"

/annotator="blatX"

/number=2

exon 51282..51747

/gene="nad7"

/annotator="blatX"

/number=3

intron 51748..52824

/gene="nad7"

/annotator="blatX"

/number=3

exon 52825..53068

/gene="nad7"

/annotator="blatX"

/number=4

intron 53069..54728

/gene="nad7"

/annotator="blatX"

/number=4

exon 54729..54991

/gene="nad7"

/annotator="blatX"

/number=5

gene complement(89202..89945)

/gene="ccmC"

/info="blatX_hit ccmC_NC_035618.1, position 1 - 744, psl

score 98.8, coverage 100.00%, match 98.79%"

/annotator="blatX"

CDS complement(89202..89945)

/gene="ccmC"

/annotator="blatX"

/translation="MSKTRNYAQILIGSWLFLTAMAIHLSLWVAPLDFQQGGNSRILY

VHVPVARMSILVYIVTAINTFLFLLTKHPLFLRSSGTGTEMGAFSTLFTLVTGGFRGR

PMWGTFWVWDARLTSVFISFLIYLGALCFQKLPVEPAPISIRAGPIDIPIIKFSVNWW

NTSHQPGSISRSGTSIHVPMLIPILSNFANFLFSTRIFFVLETRLPIPSFLESPLTEE

IEAREGILKPSSLA*SFCIHGRML*ARNL"

gene complement(90378..90974)

/gene="atp4"

/info="blatX_hit atp4_NC_035618.1, position 1 - 597, psl

score 97.9, coverage 100.00%, match 97.82%"

/annotator="blatX"

CDS complement(90378..90974)

/gene="atp4"

/annotator="blatX"

/translation="MRKSSTKMQARKMLFAAILSICASSSKKISIYNEEMIVARCFIG

FIIFSRKSLGNTFKVTLDERIQAIQEESQQFPNPNEVVPPESNEQQRLLRVSLRICGT

VVESLPMARCAPKCEKTVQALLCRNLNVKSATLPNATSSRRTRLQDDLVTGFHFSVSE

RFFPGSTLKASIVELVREGLAVLRMVRVGGSLKNKEDK"

gene complement(91148..91450)

/gene="nad4L"

/info="blatX_hit nad4L-1_NC_020455.1, position 1 - 303,

psl score 94.8, coverage 100.00%, match 94.72%; blatX_hit

nad4L-2_NC_020455.1, position 1 - 303, psl score 94.8,

coverage 100.00%, match 94.72%; merged"

/annotator="blatX"

CDS complement(91148..91450)

/gene="nad4L"

/annotator="blatX"

/translation="TDSIKYFTFSMIIFISGIRGILLNRRNILIMSMSIESMLLAVNS

NFLVFSVSSDDMMGQSFALLVPTVAAAESAIGLAIFVITFRVRGTIAVESINSIQG"

gene complement(92951..96489)

/gene="cox2"

/info="blatX_hit cox2-1_NC_008285.1, position 1 - 783,

psl score 91.6, coverage 100.00%, match 94.89%"

/annotator="blatX"

CDS complement(join(92951..93033,94338..94655,96108..96489))

/gene="cox2"

/annotator="blatX"

/translation="MIVREWLFFTIAPCDAAEPWQLGFQDAATPMMQGIIDLHHDIFF

FLILILVFVSWILVRALWHFHYKKNPIPQRIVHGTTIEIIRTIFPSIILMFIAIPSFA

LLYSMDEVVVDPAITIKAIGHQWYRTYEYSDYNSSDEQSLTFDSYTIPEDDPELGQSR

LLEVDNRVVVPAKTHIRIIVTSADVLHSWAVPSSGVKCDAVPGRLNQTSILVQREGVY

YGQCSEICGTNHAFMPIVVEAVSRKDYGSRVSNQLIP*TGEA"

exon complement(92951..93033)

/gene="cox2"

/annotator="blatX"

/number=3

intron complement(93034..94337)

/gene="cox2"

/annotator="blatX"

/number=2

gene complement(94338..96489)

/gene="cox2"

/info="blatX_hit cox2-2_NC_008285.1, position 1 - 700,

psl score 91.9, coverage 52.91%, match 50.34%"

/annotator="blatX"

CDS complement(join(94338..94655,96108..96489))

/gene="cox2"

/annotator="blatX"

intron complement(94656..96107)

/gene="cox2"

/annotator="blatX"

/number=1

exon complement(96108..96489)

/gene="cox2"

/annotator="blatX"

/number=1

gene 104009..104080

/gene="trnG-GCC "

/info="blatN_hit trnG-GCC_NC_035618.1, position 1 - 72,

psl score 100.0, coverage 100.00%, match 100.00%;

blatN_hit trnG_NC_041093.1, position 1 - 72, psl score

100.0, coverage 100.00%, match 100.00%; merged"

/annotator="blatN"

tRNA 104009..104082

/gene="trnG-GCC"

/annotator="ARAGORN"

gene 106098..106169

/gene="trnQ-UUG "

/info="annotated by ARAGORN v1.2.38, score: 117.2;

blatN_hit trnQ-TTG_NC_020455.1, position 1 - 72, psl

score 100.0, coverage 100.00%, match 100.00%; blatN_hit

trnQ_NC_041093.1, position 1 - 72, psl score 100.0,

coverage 100.00%, match 100.00%; merged"

/annotator="ARAGORN, blatN; merged"

tRNA 106098..106169

/gene="trnQ-UUG "

/annotator="ARAGORN, blatN; merged"

gene complement(114386..114458)

/gene="trnM-CAU"

/info="annotated by ARAGORN v1.2.38, score: 114.9;

blatN_hit trnM-CAT_NC_008285.1, position 1 - 73, psl

score 98.7, coverage 100.00%, match 98.63%; blatN_hit

trnM-CAU_NC_035618.1, position 1 - 73, psl score 100.0,

coverage 100.00%, match 100.00%; blatN_hit

trnM_NC_041093.1, position 1 - 73, psl score 100.0,

coverage 100.00%, match 100.00%; merged"

/annotator="ARAGORN, blatN; merged"

tRNA complement(114386..114458)

/gene="trnM-CAU "

/annotator="ARAGORN, blatN; merged"

gene complement(115364..115435)

/gene="trnE-UUC "

/info="annotated by ARAGORN v1.2.38, score: 112.6;

blatN_hit trnE-UUC_NC_037304.1, position 1 - 72, psl

score 98.7, coverage 100.00%, match 98.61%; blatN_hit

trnE_NC_041093.1, position 1 - 72, psl score 100.0,

coverage 100.00%, match 100.00%; merged"

/annotator="ARAGORN, blatN; merged"

tRNA complement(115364..115435)

/gene="trnE-UUC "

/annotator="ARAGORN, blatN; merged"

gene 117114..117187

/gene="trnH-GUG "

/info="blatN_hit trnH-GTG_NC_008285.1, position 1 - 74,

psl score 97.3, coverage 100.00%, match 97.30%; blatN_hit

trnH-GUG_NC_035618.1, position 1 - 74, psl score 100.0,

coverage 100.00%, match 100.00%; blatN_hit

trnH_NC_041093.1, position 1 - 74, psl score 100.0,

coverage 100.00%, match 100.00%; merged"

/annotator="blatN"

tRNA 117114..117187

/gene=" trnH-GUG "

/annotator="blatN"

gene 137889..138085

/gene="trnV-AAC"

/info="annotated by ARAGORN v1.2.38, score: 102.5"

/annotator="ARAGORN"

tRNA join(137889..137922,138028..138085)

/gene="trnV-AAC"

/annotator="ARAGORN"

exon 137889..137922

/gene="trnV-AAC"

/annotator="ARAGORN"

/number=1

intron 137923..138027

/gene="trnV-AAC"

/annotator="ARAGORN"

/number=1

exon 138028..138085

/gene="trnV-AAC"

/annotator="ARAGORN"

/number=2

gene 138012..138085

/gene="trnN-GUU"

/info="annotated by ARAGORN v1.2.38, score: 119.0"

/annotator="ARAGORN"

tRNA 138012..138085

/gene="trnN-GUU"

/annotator="ARAGORN"

/annotator="blatN"

gene 138859..138941

/gene="trnY-GUA"

/info="blatN_hit trnY-GTA_NC_020455.1, position 1 - 83,

psl score 98.8, coverage 100.00%, match 98.80%; blatN_hit

trnY-GUA_NC_035618.1, position 1 - 83, psl score 98.8,

coverage 100.00%, match 98.80%; blatN_hit

trnY_NC_041093.1, position 1 - 83, psl score 98.8,

coverage 100.00%, match 98.80%; merged"

/annotator="blatN"

tRNA 138859..138941

/gene="trnY-GUA "

/annotator="blatN"

gene 139460..143951

/gene="nad2"

/info="blatX_hit nad2_NC_041093.1, position 1 - 915, psl

score 96.8, coverage 100.00%, match 99.67%"

/annotator="blatX"

CDS join(139460..139613,141717..142289,143764..143951)

/gene="nad2"

/annotator="blatX"

/translation="MIYGSTGATHFDQLAKILTGYEITGVRSSGIFMGILFIAVGSLF

KITAVPFHMWAPDIYEGSPTPVTAFFSIAPKISISANILRVFIYGSYGATLQQIFFFC

SIASMILGALAAMAQTKVKRLLAHSSIGHVGYIRTGFSCGTIEGIQSLLIGLFIYASM

TIDAFAIVSALRQTRVKYIADLGALAKTNPISAITFSITMFSYAGIPPLAGFCSKFYL

FFAALGCGAYFLAPVGVVTSVIGCFYYIRLVKRMFFDTPRTWILYEPMDRDKSLLLAM

TSSFITSSFPYPSPLFSVTHQMALSLYL"

exon 139460..139613

/gene="nad2"

/annotator="blatX"

/number=1

intron 139614..141716

/gene="nad2"

/annotator="blatX"

/number=1

exon 141717..142289

/gene="nad2"

/annotator="blatX"

/number=2

intron 142290..143763

/gene="nad2"

/annotator="blatX"

/number=2

exon 143764..143951

/gene="nad2"

/annotator="blatX"

/number=3

gene 144297..144875

/gene="nad9"

/info="blatX_hit nad9_NC_041093.1, position 1 - 579, psl

score 99.2, coverage 100.00%, match 99.14%"

/annotator="blatX"

CDS 144297..144875

/gene="nad9"

/annotator="blatX"

/translation="MDNQFIFKYSWETLPKKWVKKIEKSEHGNRSDTNTDYPFQLLCF

LKLHTYTRFQVLIDICGVDYPSRKRRFEVVYNLLSTRYNSRIRVQTSADEVTRISPVV

SLFPSAGRWEREVWDMFGVSSINHPDLRRILTDYGFEGHPLRKDFPLSGYVEVRYDDP

EKRVVSEPIEMTQEFRYFDFASPWEQRNGNEG"

gene 145614..145687

/gene="trnW-CCA "

/info="annotated by ARAGORN v1.2.38, score: 118.2;

blatN_hit trnW_NC_041093.1, position 1 - 74, psl score

98.7, coverage 100.00%, match 98.65%; blatN_hit

trnW-CCA_NC_037304.1, position 1 - 74, psl score 100.0,

coverage 100.00%, match 100.00%; merged"

/annotator="ARAGORN, blatN; merged"

tRNA 145614..145687

/gene="trnW-CCA "

/annotator="ARAGORN, blatN; merged"

gene 176179..177699

/gene="atp1"

/info="blatX_hit atp1_NC_035618.1, position 1 - 1521, psl

score 97.7, coverage 100.00%, match 97.70%"

/annotator="blatX"

CDS 176179..177699

/gene="atp1"

/annotator="blatX"

/translation="MEFSPRAAELTTLLESRITNFYTNFQVDEIGRVVSVGDGIARVY

GLNEIQAGEMVEFASGVKGIALNLENENVGIVVFGSDTAIKEGDLVKRTGSIVDVPAG

KAMLGRVVDALGVPIDGRGALSDHERRRVEVKAPGIIERKSVHEPMQTGLKAVDSLVP

IGRGQRELIIGDRQTGKTAIAIDTILNQKQLNSKATSESETLYCVYVAVGQKRSTVAQ

LVQILSEANALEYSILVAATASDPAPLQFLAPYSGCAMGEYFRDNAMHALIIYDDLSK

QAVAYRQMSLLLRRPPGREAFPGDVFYLHSRLLERAAKRSDQTGAGSLTALPVIETQA

GDVSAYIPTNVISITDGQICLETELFYRGIRPAINVGLSVSRVGSAAQLKAMKQVCGS

PKLELAQYREVAAFAQFGSDLDAATQALLNRGARLTEVLKQPQYAPLPIEKQILVIYA

AVNGFCDRMPLDKISQYEKTIPNSVKPELLQSLKGGLTHEKKMELDAFLKECAITE"

gene 184681..184760

/gene="nad6"

/info="blatX_hit nad6_NC_041093.1, position 227 - 306,

psl score 91.3, coverage 12.94%, match 11.81%"

/annotator="blatX"

CDS 184681..184760

/gene="nad6"

/annotator="blatX"

gene complement(191903..192229)

/gene="nad1"

/info="blatX_hit nad1_NC_041093.1, position 1 - 327, psl

score 99.7, coverage 100.00%, match 99.69%"

/annotator="blatX"

CDS complement(191903..192229)

/gene="nad1"

/annotator="blatX"

/translation="MAFVQRRKGPDVVGSFGLLQPLADGSKLILKEPISPSSANFSLF

RMAPVTTFMLSLVARAVVPFDYGMVLSDPNIGLLYLFAISSLGVYGIIIAGWSSNYRG

RPFGRL"

gene complement(201390..201461)

/gene="trnV-GAC "

/info="annotated by ARAGORN v1.2.38, score: 113.4;

blatN_hit trnV_NC_029317.1, position 1 - 72, psl score

100.0, coverage 100.00%, match 100.00%; merged"

/annotator="ARAGORN, blatN; merged"

tRNA complement(201390..201461)

/gene="trnV-GAC "

/annotator="ARAGORN, blatN; merged"

gene 207705..208615

/gene="trnA-UGC"

/info="annotated by ARAGORN v1.2.38, score: 111.0"

/annotator="ARAGORN"

tRNA join(207705..207741,208580..208615)

/gene="trnA-UGC"

/annotator="ARAGORN"

exon 207705..207741

/gene="trnA-UGC"

/annotator="ARAGORN"

/number=1

intron 207742..208579

/gene="trnA-UGC"

/annotator="ARAGORN"

/number=1

exon 208580..208615

/gene="trnA-UGC"

/annotator="ARAGORN"

/number=2

gene 212367..212441

/gene="trnR-ACG"

/info="annotated by ARAGORN v1.2.38, score: 115.9"

/annotator="ARAGORN"

tRNA 212367..212441

/gene="trnR-ACG"

/annotator="ARAGORN"

gene complement(213052..213125)

/gene="trnN-GUU"

/info="annotated by ARAGORN v1.2.38, score: 120.5"

/annotator="ARAGORN"

tRNA complement(213052..213125)

/gene="trnN-GUU"

/annotator="ARAGORN"

/annotator="blatN"

gene 222793..224160

/gene="rrn26"

/info="blatN_hit rrn26_NC_041093.1, position 1972 - 3339,

psl score 100.0, coverage 40.97%, match 40.97%"

/annotator="blatN"

rRNA 222793..224160

/gene="rrn26"

/annotator="blatN"

gene 224537..224610

/gene="trnM-CAU "

/info="blatN_hit trnfM-CAU_NC_006581.1, position 1 - 74,

psl score 91.9, coverage 100.00%, match 91.89%; blatN_hit

trnfM-CAT_NC_020455.1, position 1 - 74, psl score 93.3,

coverage 100.00%, match 93.24%; blatN_hit

trnM-CAU_NC_035618.1, position 1 - 74, psl score 100.0,

coverage 100.00%, match 100.00%; blatN_hit

trnM_NC_041093.1, position 1 - 74, psl score 100.0,

coverage 100.00%, match 100.00%; merged"

/annotator="blatN"

tRNA 224537..224610

/gene="trnM-CAU "

/annotator="blatN"

gene 224788..230467

/gene="nad7"

/info="blatX_hit nad7_NC_041093.1, position 1 - 1092, psl

score 97.0, coverage 100.00%, match 100.00%"

/annotator="blatX"

CDS join(224788..224837,225762..225830,226758..227223,

228301..228544,230205..230467)

/gene="nad7"

/annotator="blatX"

/translation="MNGEVVERAEPHIGLLHRGTEKLIEYKTYLQALPYFDRLDYVSM

MAQEHAHSSAVERLLNCEVPLRAQYIRVLFREITRISNHSLALTTHAMDVGALTPFLW

AFEEREKLLEFYERVPGARMHASFIRPGGVAQDLPLGLCRDIDSSTQQFASRIDELEE

MSTGNRIWKQRLVDIGTVTAQQAKDWGFSGVMLRGPGVCWDLRRAAPYDVYDQLDFDV

PVGTRGDRYDRYCIRIEEMRQSVRIIVQCLNQMPSGMIKADDRKLCPPSRYRMKLSME

SSIHHFEPYTEGFSVPAPSTYTAVEAPKGEFGVFLVSNGSNRPYRRKIRAPGSAHSQG

LDSMSKHHMPADVVTIIGTQDIVSGEVDR"

exon 224788..224837

/gene="nad7"

/annotator="blatX"

/number=1

intron 224838..225761

/gene="nad7"

/annotator="blatX"

/number=1

exon 225762..225830

/gene="nad7"

/annotator="blatX"

/number=2

intron 225831..226757

/gene="nad7"

/annotator="blatX"

/number=2

exon 226758..227223

/gene="nad7"

/annotator="blatX"

/number=3

intron 227224..228300

/gene="nad7"

/annotator="blatX"

/number=3

exon 228301..228544

/gene="nad7"

/annotator="blatX"

/number=4

intron 228545..230204

/gene="nad7"

/annotator="blatX"

/number=4

exon 230205..230467

/gene="nad7"

/annotator="blatX"

/number=5

/annotator="blatX"

gene 257081..257168

/gene=" trnS-GCU"

/info="blatN_hit trnS-GCT_NC_008285.1, position 1 - 88,

psl score 97.8, coverage 100.00%, match 97.73%; blatN_hit

trnS-GCU_NC_017855.1, position 1 - 88, psl score 100.0,

coverage 100.00%, match 100.00%; blatN_hit

trnS_NC_041093.1, position 1 - 88, psl score 100.0,

coverage 100.00%, match 100.00%; merged"

/annotator="blatN"

tRNA 257081..257168

/gene="trnS-GCU "

/annotator="blatN"

gene 257544..257617

/gene="trnF-GAA "

/info="annotated by ARAGORN v1.2.38, score: 114.5;

blatN_hit trnF-GAA_NC_035618.1, position 1 - 74, psl

score 98.7, coverage 100.00%, match 98.65%; blatN_hit

trnF_NC_041093.1, position 1 - 74, psl score 98.7,

coverage 100.00%, match 98.65%; merged"

/annotator="ARAGORN, blatN; merged"

tRNA 257544..257617

/gene="trnF-GAA "

/annotator="ARAGORN, blatN; merged"

gene 257699..257773

/gene="trnP-UGG "

/info="annotated by ARAGORN v1.2.38, score: 120.7;

blatN_hit trnF-UGG_NC_029317.1, position 1 - 75, psl

score 100.0, coverage 100.00%, match 100.00%; blatN_hit

trnP-TGG_NC_020455.1, position 1 - 75, psl score 100.0,

coverage 100.00%, match 100.00%; blatN_hit

trnP-UGG_NC_037304.1, position 1 - 75, psl score 100.0,

coverage 100.00%, match 100.00%; blatN_hit

trnP_NC_041093.1, position 1 - 75, psl score 100.0,

coverage 100.00%, match 100.00%; merged"

/annotator="ARAGORN, blatN; merged"

tRNA 257699..257773

/gene="trnP-UGG "

/annotator="ARAGORN, blatN; merged"

gene complement(270665..271385)

/gene="atp6"

/info="blatX_hit atp6-1_NC_020455.1, position 1 - 712,

psl score 93.9, coverage 100.14%, match 94.17%; blatX_hit

atp6-2_NC_020455.1, position 1 - 712, psl score 93.9,

coverage 100.14%, match 94.17%; merged"

/annotator="blatX"

CDS complement(270665..271385)

/gene="atp6"

/annotator="blatX"

gene 272256..273961

/gene="rps3"

/info="blatX_hit rps3_NC_035618.1, position 1 - 1682, psl

score 94.7, coverage 101.37%, match 93.35%"

/annotator="blatX"

CDS 272256..273961

/gene="rps3"

/annotator="blatX"

gene 273838..274008

/gene="rpl16"

/info="blatX_hit rpl16_NC_037304.1, position 1 - 171, psl

score 85.4, coverage 31.67%, match 27.04%"

/annotator="blatX"

CDS 273838..274008

/gene="rpl16"

/annotator="blatX"

gene 282347..282703

/gene="nad3"

/info="blatX_hit nad3_NC_035618.1, position 1 - 357, psl

score 99.2, coverage 100.00%, match 99.16%"

/annotator="blatX"

CDS 282347..282703

/gene="nad3"

/annotator="blatX"

/translation="MSEFAPICIYLVISLLVSLIPLGIPFPFSSNTSTYPEKLSAYEC

GFDPFGDARSRFDIRFYLVSILFIILDPEVTFFFPWAVPLNKIDPFGFWSMMAFLLIL

TIGFLYEWKRGASDRE"

gene 282765..283138

/gene="rps12"

/info="blatX_hit rps12_NC_041093.1, position 1 - 374, psl

score 98.4, coverage 98.94%, match 97.35%"

/annotator="blatX"

CDS 282765..283138

/gene="rps12"

/annotator="blatX"

/annotator="blatX"

gene 294724..294800

/gene="trnL-CAA"

/info="blatN_hit trnL-CAA_NC_035618.1, position 1 - 77,

psl score 100.0, coverage 97.47%, match 97.47%"

/annotator="blatN"

tRNA 294724..294800

/gene="trnL-CAA"

/annotator="blatN"

gene 302234..304522

/gene="nad5"

/info="blatX_hit nad5_NC_041093.1, position 1 - 1452, psl

score 98.0, coverage 100.00%, match 99.52%"

/annotator="blatX"

CDS join(302234..302464,303302..304522)

/gene="nad5"

/annotator="blatX"

/translation="MYLLIVFLPLLGSSVAGFFGRFLGSEGTAIVTTTCVSFSSIFSL

IAFYEVAPGASACYLRIAPWISSEMFDASWGFFFDSPTVVMLIVVTFISSLVHLYSIS

YMSEDPHSPRFMCYLSILTFFMPMLVTGDNSLQLFLGWEGVGLASYLLIHFWFTRLQA

DKAAIKAMLVNRVGDFGLALGISGCFTLFQTVDFSTIFACASAPRNSWIFCNMRLNAI

TLICILLFIGAVGKSAQIGSHTWSPDAMEGPTPVSALIHAATMVTAGVFMIARCSPLF

EYPPTALIVITFAGAMTSFLAATTGILQNDLKRVIAYSTCSQLGYMIFACGISNYSVS

VFHLMNHAFFKALLFLSAGSVIHAMSDEQDMRKMGGLASSFPFTYAMMLMGSLSLIGF

PFLTGFYSKDVILELAYTKYTISGNFAFWLGSVSVLFTSYYSFRLLFLTFLVPTNSFG

RDILRCHDAPIPMAIPLILLAFGSLFVGYLAKV"

exon 302234..302464

/gene="nad5"

/annotator="blatX"

/number=1

intron 302465..303301

/gene="nad5"

/annotator="blatX"

/number=1

exon 303302..304522

/gene="nad5"

/annotator="blatX"

/number=2

/annotator="blatN"

gene 310034..310107

/gene="trnF-GAA"

/info="annotated by ARAGORN v1.2.38, score: 116.2"

/annotator="ARAGORN"

tRNA 310034..310107

/gene="trnF-GAA"

/annotator="ARAGORN"

gene 317813..317899

/gene="trnS-UGU"

/info="blatN_hit trnS-UGU_NC_029317.1, position 1 - 87,

psl score 96.6, coverage 100.00%, match 96.55%; blatN_hit

trnS-TGA_NC_008285.1, position 1 - 87, psl score 97.8,

coverage 100.00%, match 97.70%; blatN_hit

trnS-UGA_NC_035618.1, position 1 - 87, psl score 100.0,

coverage 100.00%, match 100.00%; blatN_hit

trnS_NC_041093.1, position 1 - 87, psl score 100.0,

coverage 100.00%, match 100.00%; merged"

/annotator="blatN"

tRNA 317813..317899

/gene="trnS-UGU"

/annotator="blatN"

gene complement(329351..329797)

/gene="rps7"

/info="blatX_hit rps7_NC_035618.1, position 1 - 447, psl

score 98.5, coverage 100.00%, match 98.43%"

/annotator="blatX"

CDS complement(329351..329797)

/gene="rps7"

/annotator="blatX"

/translation="MGGLDSEQKQLIKKLVNFRMKEGKRTKVRAIFYQTFHRPARTEG

DVIKLMVDAVENIKPICKVEKVRVAGTIYDVPGIVARDRQQTLAIRWILEAAFKRRIS

HRISLEKCSFDEILDAYRKRGISRKKRENLHGLASANRSFAHFRWW"

/annotator="blatX"

gene complement(330082..332049)

/gene="matR "

/info="blatX_hit matR_NC_035618.1, position 1 - 1968, psl

score 97.9, coverage 100.00%, match 97.87%; blatX_hit

mat-r_NC_041093.1, position 1 - 1968, psl score 98.1,

coverage 100.00%, match 98.02%; merged"

/annotator="blatX"

CDS complement(330082..332049)

/gene="matR "

/annotator="blatX"

/translation="MKEAIRMVPESIYDPEFPDTSHFRSGRGCHSALRRIKEEWGTSR

WFLEFDIRKCFHTIDRHRLTPIFKEEIDDPKFFYSIHQVFSAGRLVGGEKGPYSVPHS

VLLSALPGNIYLHKLDQEIGRIQQKYEIPIVQRIRSVLLKTSRIDDQENSGEEESFNA

PQDNRAIIVDRVKSIQRKAAFHSLVSSWHTLPASTPRLGGDQKRPFVFPPSSALAAFL

NKPSSLLFAAFLIEAAGLTPKAEFYGRECCNNNWDMRDLLKYCKRKGPLIELGEAARL

VLRSEKGLARKLAPFKTHYLIRICYARYADDLLLGIVGAVELLIEIQKRIAHFLQSGL

NLWAGSAGSTTIAARSTVEFLGTVIREVPPKTTPIQFLRELEKRLRVKHRIHITACHL

RSAIHSKFRNLGNSIPIKQLTKGMSKTGSLPDAVQLAESLSTARVRSPQVSVLWETVK

HIRQGSRGISLLHSSGQSKVPSDVQQAVSRSGMNAQKFSLYTLAGRKAAGEGGGHWSR

SISCEFPIQIEAPIKKILRRLRDRGLISRRRPWPIHVACLTNVSDGDIVNWSAGIAIS

PLSYYRCRDNLYQVRTIVDYQIRWSAIFTPAHKHKSSARNIIPKYSKDLNIVNQEGGK

TLAEFPNSIELGKLGAGQDPNNKEHSTTSLV"

gene 338995..339615

/gene="ccmB"

/info="blatX_hit ccmB_NC_041093.1, position 1 - 621, psl

score 99.6, coverage 100.00%, match 99.52%"

/annotator="blatX"

CDS 338995..339615

/gene="ccmB"

/annotator="blatX"

/translation="MRRLFFKLYHKQIFFSTPITSFSPFLSYIVVTPLMLGFEKDFSC

HFHLGPIRIPLLFPFPPAPFLRNEKEDGTLELYYLSAYCLPKILLLQLVGHRVIQISR

VFCSFPMLQLLYQFGQSGMDRLNILLGSLVLTLLCGIHSRLALGITSSSGWNSSQNLT

TSPTSLPSTVSRTSIETEWFHVLSSIGYFSSFVSLFPISVSISSQD"

gene complement(344470..345651)

/gene="cob"

/info="blatX_hit cob_NC_041093.1, position 1 - 1182, psl

score 98.6, coverage 100.00%, match 98.56%"

/annotator="blatX"

CDS complement(344470..345651)

/gene="cob"

/annotator="blatX"

/translation="MSIRNQRFSVLKQPIFSTLNQHLIDYPTPSNISYWWGFGSLAGI

CLVIQIVTGVFLAMHYTPHVDLAFNSVEHIMRDVEGGWLLRYMHANGASMFLIVVHLH

IFRGLYHASYSSPREFVWCLGVVIFLLMIVTAFIGYVLPWGQMSFWGATVITSLASAI

PVVGDSIVTWLWGGFSVDNATLNRFFSLHHLLPFLLVGASLLHLAALHQYGSNNPLGV

HSEMDKIAFYPYFYVKDLVGWVAFAIFFSFWIFYAPNVLGHPDNYIPANPMPTPPHIV

PEWYFLPIYAILRSIPDKSGGVAAIAPVFICLLALPFFKSMYVRSSSFRPIYQGLFWL

LLADCLLLGWIGCQPVEPPFVTIGQIPSFLFFLFFAITPILGRVGRRIPNSYTDETYN

T"

gene complement(348273..348827)

/gene="rpl5"

/info="blatX_hit rpl5_NC_041093.1, position 1 - 555, psl

score 99.0, coverage 100.00%, match 98.92%"

/annotator="blatX"

CDS complement(348273..348827)

/gene="rpl5"

/annotator="blatX"

/translation="MFPLHFHYEDVSRQDPLLKPNHANVMDVPGLCEIRVVPKAAPSS

FIIKNGKLAMEIPCGQKLIRTRRGSIGKSFRSNPFLGSNKDKGYVNDLARQSTLRGHG

MFHFLVRISTVMSLLDSLVEIRENSIQLSMETEFCEFSPELEDHFEIFEHIRGFNVTI

VTSANTQDETLLPWSGFLQKDEGQ"

gene complement(385116..385477)

/gene="sdh4"

/info="blatX_hit sdh4_NC_029317.1, position 1 - 385, psl

score 93.3, coverage 91.41%, match 84.34%"

/annotator="blatX"

CDS complement(385116..385477)

/gene="sdh4"

/annotator="blatX"

gene complement(385405..386202)

/gene="cox3"

/info="blatX_hit cox3_NC_035618.1, position 1 - 798, psl

score 98.5, coverage 100.00%, match 98.50%"

/annotator="blatX"

CDS complement(385405..386202)

/gene="cox3"

/annotator="blatX"

/translation="MIESQRHSFHLVDPSPWPISGSLGALATTVGGVMYMHSFQGGAT

LLSLGLLFILYTMFVWWRDVLRESTLEGHHTKVVQLGLRYGFILFIVSEVMFFFAFFW

AFSHSSLAPAVEIGGIWPPKGIWVLDPWEIPFLNTLILLSSGAAVTWAHHAILAGKQK

RAVYALVATVLLALVFTGFQGMEYYEAPFTISDSIYGSTFFLATGFHGFHVIIGTLFL

IICGIRQYFGHLTKEHHVGFEAAAWYWHFVDVVWLFLFVSIYWWGGI"

gene complement(387161..387640)

/gene="atp8"

/info="blatX_hit atp8_NC_035618.1, position 1 - 480, psl

score 97.5, coverage 100.00%, match 97.50%"

/annotator="blatX"

CDS complement(387161..387640)

/gene="atp8"

/annotator="blatX"

/translation="MPQLDQFTYFTQFFWSCLFFFTFYILICNDRDGVLGISRILKLR

NQLLSHRGNKIQSKDPKSLEDILRKGFHTGVSYMYSSLFEVSQWCEAADLFGKRKKIT

LIPCFGEISGSRGMERNIFYLISKSSYSTSSNPGWVITCKNDIMLIHVLHGQGSFKI"

gene complement(397370..397601)

/gene="atp9"

/info="blatX_hit atp9_NC_041093.1, position 1 - 232, psl

score 95.3, coverage 99.15%, match 94.44%"

/annotator="blatX"

CDS complement(397370..397601)

/gene="atp9"

/annotator="blatX"

gene 406939..408224

/gene="rrnS"

/info="blatN_hit rrnS_NC_035618.1, position 1 - 1277, psl

score 98.5, coverage 67.05%, match 66.01%"

/annotator="blatN"

rRNA 406939..408224

/gene="rrnS"

/annotator="blatN"

/annotator="blatN"

gene 409155..409273

/gene="rrn5"

/info="blatN_hit rrn5_NC_041093.1, position 1 - 119, psl

score 99.2, coverage 100.00%, match 99.16%"

/annotator="blatN"

rRNA 409155..409273

/gene="rrn5"

/annotator="blatN"

gene complement(413377..413473)

/gene="rpl2"

/info="blatX_hit rpl2_NC_029317.1, position 922 - 1032,

psl score 89.7, coverage 9.40%, match 8.43%"

/annotator="blatX"

CDS complement(413377..413473)

/gene="rpl2"

/annotator="blatX"

gene complement(428814..431067)

/gene="ccmFc"

/info="blatX_hit ccmFc_NC_041093.1, position 1 - 1338,

psl score 97.1, coverage 100.00%, match 98.65%"

/annotator="blatX"

CDS complement(join(428814..429383,430300..431067))

/gene="ccmFc"

/annotator="blatX"

/translation="MVQLHNFFFFITSVVVPCGTAAPVLLKWFVSRDVPTGAPFSNGT

LIPILIPSFLLLVYLHSRKFIRSMDGVKSGVLVRASCPILLPDIIGRSSSETRARNAL

FRFVPILHFLLLEFKGDFPYLESFCGVLRLLFFRTFFSLPRDRSAKRERARRRKGQTL

RPNGNEQRRNEKRKCPGRPHLERRVEGVGPVAFPAPPSSGGACMGGVLPEIGLEAPAL

PTSRQLMAVGRDYYQKVNMKMNISHGGVCIFMLGVLLSMVRLRSTNTKKIQFTQRLPL

GSELHMGKERCCLRGLDHLHGPTFHSICGNLMIYKPSLTNDRLIFEHDESLRADLLSI

HFWASYENGKLEHFLHRWMKNREHPNFWLSMFPEKRYFRETTSTTEVAIHTNPFTDLY

ASIGTGSSRTGGWYTTIMKLPFLFLIRIGFLLASLGGSRSLLRQLQKDKLGWN"

exon complement(428814..429383)

/gene="ccmFc"

/annotator="blatX"

/number=2

intron complement(429384..430299)

/gene="ccmFc"

/annotator="blatX"

/number=1

exon complement(430300..431067)

/gene="ccmFc"

/annotator="blatX"

/number=1

/annotator="blatX"

gene complement(439401..441035)

/gene="ccmFn"

/info="blatX_hit ccmFn_NC_041093.1, position 1 - 1740,

psl score 97.8, coverage 93.97%, match 91.90%"

/annotator="blatX"

CDS complement(439401..441035)

/gene="ccmFn"

/annotator="blatX"

/translation="MSIYELFHYSLVPGLFIAFTYNKKQPPAFGAAPAFWSILLSFLG

LLFCHIPNNLSNYNVLTANAPFFYQISGTWSNHEGSILLWCRILSFYGFLLCYRGRPQ

SHNVSKRGGHRESLLFSFVLNFVKNSILSLPRYEQKSRVLHEPQLYTLFVLRTLVDSE

LCSREGKRTHPLLHLARDDKERASSIDEQRIDGALGIAFFFFLFLSASSDPFVRNFFV

RTEPLAESNPVPQDPILAIHPPCIYAGDVASAMGFGLCRSKMMNGIVALHSPPMRKDA

AEKNGTLLCSAGCGGSRITSGLFALQFKHVGAKCYPALLLRSKRSLLMLLRRRFFAFS

SLWTRALVDTGRGRAKRFFRNGKKKTTTLPLCWTAGANTVVSDQDQEPIRIWILTCRC

FLTVGILPGSWWAHHELGRGGWWFRDPVENASFMPRVLATACIHSVILPLLHSWTLLL

NIVTFLCCVLGTFSIRSGLLAPVHSFATDDTRGIFLWRFFLLMTGISILLFSQMKQQA

SVRRTYKKEMVVARSTLVHLRHLARARPRPLMLWKN"

gene complement(452694..452766)

/gene="trnC-GCA "

/info="blatN_hit trnC-GCA_NC_035618.1, position 1 - 73,

psl score 100.0, coverage 100.00%, match 100.00%;

blatN_hit trnC_NC_041093.1, position 1 - 73, psl score

100.0, coverage 100.00%, match 100.00%; merged"

/annotator="blatN"

tRNA complement(452694..452766)

/gene="trnC-GCA "

/annotator="blatN"

gene complement(454737..454810)

/gene="trnf-CAU "

/info="blatN_hit trnfM-CAU_NC_006581.1, position 1 - 74,

psl score 91.9, coverage 100.00%, match 91.89%; blatN_hit

trnfM-CAT_NC_020455.1, position 1 - 74, psl score 93.3,

coverage 100.00%, match 93.24%; blatN_hit

trnM-CAU_NC_035618.1, position 1 - 74, psl score 100.0,

coverage 100.00%, match 100.00%; blatN_hit

trnM_NC_041093.1, position 1 - 74, psl score 100.0,

coverage 100.00%, match 100.00%; merged"

/annotator="blatN"

tRNA complement(454737..454810)

/gene="trnf-CAU "

/annotator="blatN"

gene complement(455188..456554)

/gene="rrnL"

/info="blatN_hit rrnL_NC_035618.1, position 1988 - 3354,

psl score 100.0, coverage 40.76%, match 40.76%"

/annotator="blatN"

rRNA complement(455188..456554)

/gene="rrnL"

/annotator="blatN"

gene 466222..466295

/gene="trnN-GUU"

/info="annotated by ARAGORN v1.2.38, score: 120.5"

/annotator="ARAGORN"

tRNA 466222..466295

/gene="trnN-GUU"

/annotator="ARAGORN"

gene complement(466906..466980)

/gene="trnR-ACG"

/info="annotated by ARAGORN v1.2.38, score: 115.9"

/annotator="ARAGORN"

tRNA complement(466906..466980)

/gene="trnR-ACG"

/annotator="ARAGORN"

gene complement(470732..471641)

/gene="trnA-UGC"

/info="annotated by ARAGORN v1.2.38, score: 111.0"

/annotator="ARAGORN"

tRNA complement(join(470732..470767,471605..471641))

/gene="trnA-UGC"

/annotator="ARAGORN"

exon complement(470732..470767)

/gene="trnA-UGC"

/annotator="ARAGORN"

/number=2

intron complement(470768..471604)

/gene="trnA-UGC"

/annotator="ARAGORN"

/number=1

exon complement(471605..471641)

/gene="trnA-UGC"

/annotator="ARAGORN"

/number=1

ORIGIN

1 TTCCTTAAGG TCTCCGGCTA AGCTGACTTC CAGCGGTAGC GAAATAGGAC TGCTTAAGCT

61 AAAGGAACTG TTTTCTTTAT TGACTTTGTG AATCCAATAG AATAGATAAT CTAAGGTAAT

121 CCGAGGATAA GTTTGATCTA TTGTAAGGGG CGAAGAGACA AGCATCGAGA ATTTCTGCGA

181 AGAGGAGAAG AGACAAGTCT AGTATAGACG CCGGAAAGAA GAGCCAAGTA ACGTTGATAG

241 ACGAAGGGGC GAAGAGCTGA TTAAATAAAG GCTAAGGAAG AAGAGTCCTA ACACCTGCTA

301 AAAAGAATAT GGATTCCCCC TACAGGGCGC CGTCCTTGGC AACGCAGCAG ACAGTTCCTT

361 TAGTGCATTA GACCTGGTCG ACCGGAGGTG CTTTCAGGAG TCTGAGTTCC AGGAATAATG

421 AATAAAAGAC AAGACTGCCG ATTCCCCTTT AAGTAAGCCA CTCTAGTTTC AGTTTTCACT

481 TTAACAGTTT GTAGTTCAAA TTCTCTAGGA CGCCTTAAAA GAAAAAGACC ACCCATGCGA

541 GTATAATAAG ACGCCCTTCC AGGGCCTAAC CTTCTGGCTA AAGTTAAAGA ATCTGATCCA

601 AAACTAGTCT TTTCTCTTCT TCTGAGGTGG AATAGGGAAC TCTTGACATC TTCTCTCTTT

661 CTTCTGGGGT CTTAGGACCC ATATCAAGGC TTAGGCTTCC ACAGGAGTCT CTATAGGTTT

721 ACAATTGCGC ATTTGGTATC GTTCAAGCAG CTAATGTAAG CCCGAGACAA ACAGTTGATG

781 AGACACCATG TTTAGATTAG AAGAGTATAT TGGAATTGTA TAGAAGTGGA GCTTTTTCAC

841 TTAAAGAAAG GTTTCTCTTA CTAATGTCAG CTTCCCCCGC CCGCGCAAGA GGTATAATTG

901 ATAATATGTC GAGTCTATCC CATTATTTAT CTTCCCTTCG GCACTAGGAT CAGTGAGAAA

961 AGCCCCAGCT TCTGTATATA AAGAATCAAT CCTGTTCTTA CCAGTCCTGT GTTTGTTTCA

1021 AAGCAGCAAA AAAAGAATGA GTATTGCCAT TCCCTAATTG AAACCAATCC ACCCGGCGTC

1081 TATACTAGAC GCTACTGACT CTAAAGATAC TGAGCCCTAC TTAGTTATTC AGCTCTTCGC

1141 TTAAAAGTCT ATCAACTGGG TTCTTCAATA CCTTCGTCTA TCGACGTTAT TCAGGTCTAA

1201 AGCCTCTGGG TCTAACGACC TTTCACTTCA GTCTTCGCAT AAAAAATCAT AAGAGAATCA

1261 ACGTACGTAG ACTTAGCTTC ATAATGCCTA ACGGCGAAGG GAAGGTAGAC ACAAGCCGAA

1321 GGCGCAGTAT CTACTTATGG TTGGTTCATA TTCTACTTTC TTTCATAAAA TCGAATCGAC

1381 AAAGAATGAT TTACGAACAG AAAATCGTAA ATTAGAAATC AATTAGTGTT AGAAGAATGA

1441 TATACTTACT CTGTTATGTT CGAAGCCTTC CAACAGTATG TTTTCCCTTT TCTTTTTGGA

1501 AAAGAGTACA GCCTTTTGTT TCTATTTGCC TTATTTCCTG GTTGGAAAAC CCGACCGGTG

1561 ATTTCTGACA AGTCTTTCTT CATTTCTCGA GAGAGCAGAG CAGTCAAAGA ATGAACCAAA

1621 TGATTGTAAA ACTCAAAATC CTGTATTCCC TTTTTCAAGA CGCAGCAACA CCTATGATGC

1681 AAGGAATAAT AGACTTACAT CATGATATCT TTTTCTTCCT CATTCTGATT TTGGTTTTCG

1741 TATCATGGAT CTTGGTTCGC GCTTTATGGC ATTTCCACTA TAACAAAAAT ATTACTAAGT

1801 TGGCGATTAA ATTTGCTATC CTCGTGTTCG TAGTTCTGAC TTCTCCGGTG ACTGTAGCTA

1861 ATGCTTCTAG TTCCGAGGAG GCAGGCTTAC CTATTATGCC CTCGTCGCCG GTTCCGTCTA

1921 TCTCAGAAAT GAGTGAAAAC TGGATTGAAA GGACGTATGG AGGCCAAGAG GAAGCATCTT

1981 CTTCGGCTCC ACAAGCGGTC CCACAAGGGG TCAATGAAGA GCCCCCCCAA TTCGAAGTAG

2041 AGCATTATTT ATTGAATGAT GAGATTAGAC GAGAGCAATT GTTTAATAGG CTACGCCTAC

2101 AGTCTTTGGT GCATCCGGAT CTTGACATCG AGAATCTATT GTATTATCAA GTGGCGCTCG

2161 AGAAAAAGAT AGAACGCTGT CTTATTCTGG ACGGCATTCC GTCTCAAAAG ATTCTAAATG

2221 AATTAGCCTC CTTAAGGGGG ATTCTTTTTT CTCCTCGGGG TACTCCCCTA AAAGTGTCCA

2281 CTTTGGCTCG CTATCTGCGA GAAATGGAAC AAAATGGAAT GCGTCAAGGC ATTCTTTACG

2341 GTCGGGTTTG GAAAGCCATT CGGGAGTATG ATTTATTCAT TCATAGGTAA CTAAATCCAA

2401 CCCCGCAAAG GATTGTTCAT GGAACTACTA TCGAGATTAT TCGGACCAGA TTTTCCAGTA

2461 TCATCCTTAT GTTCATTGCT ATACCCGAAA CGTACAAAAT AGAGTAAATA TGGTAAAAAC

2521 AAATGTAGTA GAGGTTGCAA AACTAGCTTA TCCGAGAATA GGGTTAGGGT TTTCTCCGCT

2581 TCTCCCGAAA TGTGACCCTC CTGTACGACA AAACGTTGTA AGCCCGTTTC CCTTCCGGCG

2641 TCTATACGCT ATTTGTCTCT TCGATACTGA GTCGTAAAAC GACGTTATTC AGCTCTGCCG

2701 CTTCTGCGTC TCGTAGAGAC GCTGCGTCAT CGTGATGAGG CAACAAAGCG AATAAATAAG

2761 TATAAAAAGA AGATAGGAAT CAGACACGAG GTTGTTTTTT CCAGCTATGA AAAATCCATG

2821 CCTTCTAAAG TAAGGTCTTA TTGTCGTAAT GCAGCCCTTC CCCTTGCTCC TTGGAAAAAT

2881 GAAAGCATCT CTGATCGTTC GTTCCCCAGA GAGTGGGTCG TCCTTTGAAA AGACCATGTT

2941 GGCGGCCCGG AACTCTCCGG TTGCCATCCA TTCCTCACAC TCTTTAGGCT TCTTCCCCCG

3001 ACGCATATAC TATACTATAC TTGTCTCTTC GCCCCCGCCG TCTCTACTAT TACTATACGT

3061 CGATCTTTGA ACCATGGATT AAATATAGTT AGTAGAAATG GAACCTCGAA TGCAAGTTCT

3121 GAGGGAGAAG ACAGGAAGGA AGAGCTAAAC GGAAGCACTT TTTTTATTCC CCTTCTCTAA

3181 GGTAGTTTAC TTACTTAGTG CTTGAAAAGC ATTAAGGAGT GGAATTATTG AGAAAGAATA

3241 GAAGGACTAG ACTAGTGACA GAGAGGGGAA GATTTCATTT AGGCGGTAGA CTCAAATCCC

3301 TCTTCGCCCC AACAAGCAAC GGATAAGCTA ACGCGAAATC CGTTGCGCGT TAGTCACGCG

3361 CAGCCGGCTT TCTTGTTCTA TCGGCTCAGC TCTATCGAAC CTTACCTTGA AAACAGATAA

3421 GGAACTCTTA AAGAGAAGAT GACTCCTCTT ATTTATTCAC GGGATTCTTT CATGTTGATG

3481 TTGATGAGGC TAGTTGGAGT TTTGGACAAC ATTTGCTATA TCCCGAAGGC CCTTCAAACC

3541 TTGCTCAAAT AGGGAAGACC TATTATTTAT CCACAGTGTG ACCATAATTC TTACACCCCT

3601 CACAGAGAAC TGGCCTCCAT TCAAACTTGA CCTCTTGATC AACCACCACC CCATGTTCAT

3661 TTAGGAAAGA GATAAAGTAA GGGAGAGGAC TCTGAATTGG CACATCAATC AGCACCCTCG

3721 CGTATTGAAG CTTATCCTTC TCATCCGTTG CACGATCTAG CTTAATAAAC GAACGAATCC

3781 GTCCCAACAA GCTAGCAATC TTAGTCAGAG CTCTCTGTCC CCAATATTGG CGGAAATTGA

3841 ACCCAGCATG AGTAATCCCA TCCTTCGATA AATCAAGATC AACAGACCAG GATTTCATTA

3901 TAACAGGGTT GGAGTCAAAC ATGGACATGC CAACAGACAA GACCTTATCC TTGCTATCAA

3961 CAGAATCAAA ACGCACAATG TAAATACCCT TACCCATGGC ATGGATGCCA CCTTCGAGAT

4021 ACCCCATTTG CCCCGCATCC TCTTTGCAAA ACCAGCAAAC ACCTCAAGGG GAGGAGAAGC

4081 ACCCAAAATT GAACACACCA GAGCCGAATT CCAGTAATAA ACTTCCTCCG CAATATCATC

4141 AAACATAATA CGAACAGAAG GAACAGTAGG TGGAGTGCTG GCCACCACAG CAGGACTCGG

4201 CCGCGGCTGA GAAGATCCAG CCCCACCCTA CTTCAGGACA CACAACCACT CCGACAATTG

4261 ACGCCGAGAC GACAATTGAG CAGACAACAC CCTCTCCGAT TGCGCAGGGG ACAAGATATT

4321 TTCATCCAGG TCTGAATCAG TCAAATCCAG CTCCGGAACA GTCTCAATCA CCGGTTTACC

4381 CTTCTCAGAG CCCCGGCACT CAACCGGCGC TTCACTCGAA ACAGACAGAA GCAGTAGCCC

4441 GTACGTCCCG TCGCCTATAC TAGGCTTGTC TCTTCGAGCG TAGTGGTTAC TATGGTGGTC

4501 ATAGTGATGT CTACAAGCAT CGAGGTTCTA ACCTGTACTA CTACGATGTG AACTCTCTCT

4561 ACCCTCATGT AATGAAAGAA GGAGATATGC CGTGTGGGAC CTCTGTGTGG CATTCTTATC

4621 TGGGTGGTAA GGATATTGAT ACTCTGTTTG GGTTTATTGA GGCATATGTG GTATGTCCTA

4681 AAGATATTTT TAAACCTGGG TAAGGATAAT ATTATGATTT TTCCTACAGG TAAGTGGGTT

4741 GGTGTTTACT TTAGCGAAGA GTTCAAATAT GCTGTAAAGT TAGGGTACAG TGTGGTGCCG

4801 CTCTCTGGCT ACCTCTTCGA GAGGAAGGAA AGCCCTTTCA AGTCTTATGT TAGCTCGAGT

4861 CGGTTACTGG CTAAGAAAGA AGGTAATGAT GCATTGTCCT TTGTGTATAA GATCCTTATT

4921 CATTCTCTAT ACGGAAGGTT TGGGATCAAT CCGAGCAGTA CTTTTACTGA GATTTGCGAC

4981 CAGGATCGCT ATCTGAAACT GATGAAACTT AAATCATTTA TCGACTCTCA ACCTCTTAGA

5041 AAAGACCTCT TCATGGTATC CTATCATAGC AACGTAGGTG ATGATATCAG TAATTGGGAG

5101 CCACCTAAGA ACTCTGCTGT TCATCTATCT GCGGCTATTA CCGCTTATTC AAGAATGCAC

5161 ATGTATCCTT TCATTTCAAG AGAAGACTGC TACTACACGG ACACAGACTC CGTGGTGCTA

5221 GGTAATCCTC TTCCTGACTC TGCAGTCTCT TCATCCGCAT TAGGCTTGTT TAAGTTAGAA

5281 GACGATATTG AAGTTGGTAT CTTTTTAGCA GCCAAAGCCT ATACATACCG AGATGGGAAT

5341 AGTGTAACAA AGTTCAAGGG CCCAGCGAAA GATCATGTGA GTCCTGAATG GTTTGAAAAG

5401 CAGTTGGCCT AGGCGTAAGA TTCGGGTAAA GGTGGATAAG AAATTCCGCA TAAATTGGGA

5461 AGAGCTAGCT GTCTGTAGGA AAGAGACCTA TTTCAATCTG GGTATTAAGC CTAGCACGAA

5521 GAGGATTACT GAAGATGATG ATTCAACCAC TCCTTATGAT ATTGAAGAAC GCGCTCCGCC

5581 AACAATATGT ATAGACTAAA GCGGCCTCAA GCGCTATTAG ATAGTATAGT AGCACTCCAA

5641 AAAGATAAGG AGAATATGGG TCAAGAGTAC GAGGATCTTA AGAAGATGTT GTTAAAAACG

5701 AAAGAAAAGG GCAAAGCAAC TGATTGGAAG AAGAAAGATG AGATAGAGAG AACTGAAGAA

5761 ATGAGTCAAT TAGAGAAAGA TGAAGGGGAG GGTACTAAGA GTGATTATGA GAAGCCGGAT

5821 ACCTAAGATA TAAAGACCTT TTTAGCATAG AGAGCTTTTA TCACCCACTT TAAGAGAATC

5881 CCTTAAGAGG TGTCCCAAAC TCTCTAAAGA AGGCAGGATT GGAGCCTTAT AGACACCAAC

5941 CAAACCTGCT AATGCCCCCC AAAGAGACTT CCTGTCTTCA ACAGTATGAA GACCATAACA

6001 GAAGGTTAGA AAGTTGTGCC TTTGAGAATC CCTATGGGTC ACAGAACAGT GCAAGAATTG

6061 ATCCATACAA TGCAAAAGCT GAACATCAAC ACAAACTGGA TCCCACCCCA CCCATATCCT

6121 CCCTCTAGGA GAATGGGAGT AATTATCCAA CCAACACCAG GTTCTAGGCA ACAGAACTTT

6181 CTTTTGATTT ATATTCTTAA CTCTAGTCTC AAACAACAAA TGGAGTAAAT GAGTAGCAAG

6241 AAACTTCTTA ACCAACTTTA TTTTAGGGTC ACTATTAAGA CCCTTAATAT TCCCAGAAAT

6301 TCATCAGGTA AAATAAGGGT TGGATATCCC TTCCCCAATG ACATCCAGTC TATCTGCAAT

6361 ATGCCCCACT TCACCACTGT CATCATCTAA AATAGAAAAA GGGTTGAAGT AGTAGGATCC

6421 ACAGGATGCT TAGTGGTACC CCTACTCTTT CTAGTAACCA ATTTCCACCC TGCCTCTTCA

6481 GTGTTAACAG TTGCCTGAGC TACCTGATTG GCAGGAGTTT GAGTAACAGG AGGAGCATAA

6541 GATGGCTCAG CCACACCCTC CTTCATTTGC TCAGTCTCCT GCTGCAGGAA CCCAGACCTT

6601 TTTCACTTCT TTCTTAGGCT TAGGTTTATC ACAATTATCC CCCACTTTAT TACACCTTTC

6661 ACAGAAAGAG GGAGTCCAAT CATAGGAAAC ATCCTGCTGA AAAAGGACCC CATTACTATC

6721 CTCCAACCCG ACATGATCAG GCAATTTGTT GGTAATATCC ATAGTGATCG TAGGAGCCTA

6781 GCAAATGAGA CTCGAAGTTG CTTAGAGGTA CATGAATAAG CAAACAAAGG GACTCCAAGC

6841 AGGCTACCAA TTCTGCTAAG TGAATCAGCA CTCCAACAGT TCAAAGGCGG ATTTGGCAAC

6901 CTAACCCACA GTGGTATGAC TTTCAAAACC TCCTCATTGA AATGGAAGGT ATGAGTCCAT

6961 GGTTTAACAA CAACAGGCTT TCCATAAAAA GGGTGAGGTC CAGAAAAGAC AATTTTCTTT

7021 CTATCTGAAA TAGACTTAAA TTGCAGAATG AAATAACCAG CCTCATGCAA GTAGATACTA

7081 GGAGAACTTA CATTATTCCA GGCATTAGCA ACTTCACGCT TAACTGCAGT GATCGTAGGA

7141 TTTGAACCAA CAACATAGAA GACCATAGCA GCCTCCCACT TTTCCCTTTG TCCTCTTTCT

7201 GCAATTGCCT TTTTCCCATC CTTAAGCAGG AGAGCCACAA AAGATAGAGA AGCCCCCTTC

7261 GCAGCATGAG AAGGCCCCTT AGCAACATTA ACCCATGGTT GGTTCAGATT GTCCATTGCT

7321 AGATCCCAAA TTCGCCGATT GAACACGCTC ATTTCCCAAA TCAAGTCTTC GACCAACTGC

7381 ACCGGAAACA GAGTCTGTGA CAGGTGGTAA CACTGTTACA TTCGAAGGAG GACGAATAGT

7441 CGAAGAAGAC AAGGTCGGAG AAGTAGGAAC TTGAGGAAGG CCCAAAGACC TACTAAATTG

7501 CACCATAACA TCCTGCATCT GCACCGTAAC CAAACCAGCT GAAGGGTGAA CTAAAGACGG

7561 AGGAGGCTGT ACCAACACCT CATCAGTCCC GGAAACAGGT ACTCCTACCG AACCCTCAGC

7621 CACCAGAGAT GATACCGAAG AACTCGCAGC ATTATCAGAG ATCGTAGATT TCTTGTTCTT

7681 CGCCATCAAT GGTGAAGTGC GCACGATAGT AAATCGCCCT AAACGTGCGC CTCTACCTTG

7741 AGAGAGAAGA AAGATGTGTG ATTTGGACGA AATTGTTGGA CAACCGACGC ATAGTTTCTT

7801 TCTATATTAC TTCAACCTTA CCTTTCTTTT TATCAGAAAG ACTTATAATG CAAGCTTTTC

7861 CTTAGAAAGT TTTCTCATAC CTTTCATTCT ATGAGATATA GATAAGGTTC ATTCGTTATC

7921 TAAATTTGGA GAAATATCAC TTCTTTCAGA ACGGGTCGAG CGACTCCGTT AATTCGTTCT

7981 TGCTTACTCG CTCGGGCAGG GGACGGTCTC GTATATAAGG ATCACGGTTG CATTTAGGAG

8041 TGATCTTTCT CGTCATCCCT CTCATATCGA TCCATTGTCT AAGGATTAGA GGATAGTCAA

8101 GGTCTAACCT TGTAAGGCTG GATAAAGAGG TAGCCCTCCC TATTCTTTAC TATGTCTTAA

8161 GCCTCGCAAC CCTTTCCTTT GTATCGGACC TTTACCGCTT TCTATGTACC CAGTCAACGA

8221 ACCTCGAAAT CTAGTATAAA TATAAATAAA ATATTAGGTT AGGAAAGAAA TCATTAGATT

8281 AGGTGGAATA CTTTTTAACC CAGTCAAAAC TTTATTTTCC TCGATCGAGT TTAGTAGAGG

8341 AAGGGAGATA GGAAATAGGA ATGTTAACCA CATTTTAATC CAATTGTGGT ATGGTATAAA

8401 GTATACTCCG ATATAACTAA CAATTCTTCC CTTGATATAG GGATTAAGAG GAACAAGAAG

8461 ATTTTTGATG GAACTTGTAA ACACCCTGAT GGACTTTTTA GAGACAGAAT CTTCCTTGTA

8521 CTGTGTAGAT GTAATGACAG GATGAAAACC TGTTTGATTG GATAGTGTGT GTGTTCTGTT

8581 GGTGCTATGC TTAGACGAAT TAAGCCTATT CCAAACCCAT CTCGACCATG GAACATTAGT

8641 ATTCACACCT CTAATTTGTA GCCACTACTA ACCGAGTAGA GCCCTCTTGG ATTAGCCATC

8701 CAAGAGTTAC CTCTATACCC AGTCGTAAAT CTTACCTTGA GAGCGCATAT GGCCCTCCAT

8761 CCAATACCAG CTTGCAGAAA TGGGAGGAGA ATAACTCCAC CAATCGCTCC CTTTCATATA

8821 AACATGGTCG ACCCATTTCA CCCACAGGCA GTCAGCCTTG GTAGCCACAT TCCACACATA

8881 CTTACCCATT GAAGCATAAT TCCAGTCAAT AACATCATGA ACACCTAAAC GAGAAGATTC

8941 CTAGCTACTG AGGTATGTAA TCGCTTAAGC GAAGCTTGAG GAAGAGGGAT CTCGAATCAA

9001 TAAATTCCTG GGTTGTTGTC TTAAAGAAAG CTTTTAGTGC GCGTTGCATG CTTTGTATTT

9061 GTAATAGTAC GAACTAACTA TAGTTAGTAA GGTTACGGGG CATTCCACTG AAGAAGTACG

9121 GCATCGGTTC TTGCGAATTA ATCTGCTGTT GGAAGAAAGC TAACACTAGA ATATAAGGGC

9181 TCGATCCCAG ACTTAATAGC ATTCAACGAA ATAGAGGTTA GCGAAGAGGG AAGGGAAGAG

9241 AGAAAACAAA TGCTTCGGCT AGCGAAGTGA GTGAGCGCGG GTAGGCAACG AAATTCACTG

9301 ATCTTTCTGA AAACGAGGTC CTTCCTATTA CCATACTCTT TCAAGTTTTA AGGTAAACTA

9361 CCTTAAGCTG CGAAGCAGTA TAATATACTA CATACCTGCT AAAAGCAGCG AGCACGACTC

9421 CCTTTCTTAT TAGATAAGGT TGCTTACTTG GAGATTGGTG AATCAGGACT TCGATCTGAA

9481 GCTGGACTCG CTTATGAGAT ATCCTCTGAG ATGGAGGTTC CGTTTGATAG AAAAGGAATT

9541 TGAATTGGAC ACTAACTGAA ACTGAATCTT TCCTGAGTGA ATAACTGGTT GGGTCTTTTA

9601 TGCCCTAATC TTTTTGAGGG TAATTTTGAG TACGTGTTGA AGGGGCAAAT GCTCTGCAAG

9661 AATTTCAGTC CTCCAAAATA AAATGCACTT TTATTACTTG GCTCACTATT CTGGACAGAC

9721 TTGCAACCTG TGATAGATTG CAGAAGTTTG GGATAGTGTG TGATCAGTTG TGTGTGCTGT

9781 GTGGCAATGT AGATGAAACC AGAGATCATC TTTTCTTTGT TTGTGAATTC TCATATGAAA

9841 TCTGGAGCTC TCTTTTGTGT TGGTTAGGAA TGAAGAGGAC TGCAGGGGAT TGGCAGGGTG

9901 TTCTGCAATC TGCTCACTGT CAATCCAACT CATCAGCAAG CTGTATTTTC AGAATGCGCA

9961 TTTCAATTGC AGTTTACTTC ATTTGGAGGG AGAGGAATGC TAGGAAGTTC CAGCAAGTTG

10021 AAATGAAATG AAGCCTGATG AGATTGTGAG AAAGATCAAA ACTCTTATTT ACTCAAGGTG

10081 TTTTCAAGTT AGGAAATTAG CTTGTAAAGT ACCTTAGATG ATGTCTTCTG TGTTTTGGCC

10141 TGTTTTGTGC CTCTTGTTAC TGGTTGTTTG TATAACCTTA ATTGGTTATC AAAGAAGAGA

10201 CAACTGCCTT CAGGAAGCTA CTTTCCCTTC GGTAGTAGCT CTATCTGCTC TTTAGTCGTA

10261 GCAGTTAGGG TAGCGGCTCT TGCTAGTTCA ATCTGTTAGT AGCTCGGTTA GTAGCTTCAG

10321 TTAGAGCTCT CCTTTTAGTC GACCCTCTCC CTTCGGTTAG AGCTGTCTGT TAGTTCCGAT

10381 CCTCTCTTTC CGGCTTAGCC TACCGCTCCG TGGGCTTCTA TCCCCCTGGT AGTCTTAAAA

10441 GGATCTCTCA AGAGTGAAAA TCTCTCTCCC CTTCTTCTGG CATCACAGCC TATTCTATTC

10501 TCTACTCTCT ACCAGCTTCT GAAAAAAGTT CTACTGCCAA GCTAGTGGGA TCGATCTCTT

10561 CTACTATTGT CTTTCCTTTT CATCTTGATA ACCTTACCCC GGAACAAATT CACCTTCCCT

10621 GCTCCCGACA TGACTGACTG GGCGAGGAAG AACAGCGGAG GCAACCTCCA CTCGGATCAA

10681 CTACCTTTAC TTTAGAGATG GGAAAGGAGT CAGAACTGAT AGCCATTTCC CCGTCGCCTA

10741 TACTAGGCTT GATCTTCGAA CCTGAGCCAG GCGAGGATGA AATTCATCCC TTTAGAATAC

10801 CCTACCCACC AACCAAGAAA ACGACTGCGC GTGACGTGAG CGCAACTAAG AAAGCGGTAG

10861 CTCATCCGTT GCTTGTTTGA TAACTCGTAG GACTTAAATA ACGGGGTACA TTGAAAGACC

10921 GGATCGAGGG GACACTGAAG ACTTTTATGC TTACCGGTAA TCGTCTTTTA GCGTAGACCA

10981 ACCCAACCCT TTCTTTAGTT TATATTGGAT TGAATTAGCA AAGTAGCTTG CTTCCCGGGT

11041 GTCGGTATAG GTAGGGCAGC TCATAGAAAG AAAAAAGTTC TTTGCGGTAA GCGTTATTAG

11101 CTTACGCTTC CTCTCCTCTT CTTGGCCTTT AGTCCACTTT GTTCTCTCAG TCCGTCAACT

11161 CGTAAAAATA GAACAGTTCC AGCTGGTTGC CCCTACTCCC ATAAAGTTGG AAACACGTTC

11221 AGCTCTTTAC GATCCAAGAG AATGTTTCTG TTCCCTTATC CGCGATTCTG GTTCTCGATC

11281 GAAGGCCGGG CATTGGTTTG CTTTTAGGAG AATAAAACTC TGTAACTAAA TGAAACTAGA

11341 TGAACTTTGC GATATCGATT CTGCGAGTAC TAGACTTAGG ATTACAGAAG CCACTAAGAC

11401 AGAAGCGGCT TTCATTATAT TACTAGGAGC GAAATTGAGG GATCATAGAA TTCCTGTTTA

11461 GAAGAGTCTT CTCTGACCTT CTTATTGATT GGTTCCCCGC AGTCGCAAGG GCTGCTGACA

11521 TGATGCTCGC TACAAACCTG ATCTATAAAG AAAGGTATCT TTAACGAGCT AACTCTCTTC

11581 ATCTCGTTCC TATTCAAAGC CAGCTTGTCC GCCGGGCAAC AGTCTGGCCT TCTTCTTTGC

11641 TCTTCAATCG ATGCGCTTGT CCATAGAACG AGCTCTGCTA AGCGACTAGC TGCCTTCTTT

11701 CCTAAGTCCG TAGCTCAAGT TTACCTTAGC AAACCTTACT TAGCTAGCGC TACCTTTAGC

11761 AAGCAAGTGA GTTACAAACT CTTTATCCTG ATATATCTCT TCGGGTTTTT CCGAAAAGTC

11821 TTTGTTTTCG TTTCTTATTA TCTGACTCCC GTTTGTTTGT TTAACTCAAC ACCAGCACCC

11881 GGCTTTCCTT ACTTGTCTGG AAGTACAAGA AGGTTGGTAG CTTTGTTAGG ACTTAGGTGT

11941 TTTAAAGATG AGAAGACTGA TTATTAGTTC TATATACATA ACTCGAGGTT ACGAGCTCTG

12001 CTTACTTAGC CGCTCACTCG AACTGTAGTT CTCGTTTTCT TGTCCTATCT TGTGAAACTT

12061 TTCCATTTCA TTTCGAGTTA ACTGCATGGG ATCAGCTCAC ACGAGCAGAG ATCCCCTCTT

12121 TCTTTTTACC TCATTCACTA CGGGGAATTT GACCCCTTCT TCCGAACCTC AATCTTCTTC

12181 CTCCAAAGCT TTCTCCGGCT GTACCGACAA AAGAATCCTA TCATTGGACT CTTCTTGTAT

12241 AGGACCTGTA TAAGCTTGAA TTTCTGACTT TATAGGACTT AAACCTCTAA GTTGGTATGC

12301 AGTTGAAGGA AAAGCGCAGC CGCGGAAGTG TCAAGGGGAG ACGAAGTCTC AAATACCAGA

12361 GCAAGTGAAT AGCGGGCAAA GGGAAGAGAA GCGGAGCGCG AGCACTCGTT ACTAAGTAAA

12421 TGAATCACGG TAGATAGAAA GTGGAGTGGG CCATGCATGA TGAGGAAGCC TGGTATGAGC

12481 AAAGGCAGAA AAGAACACTG ACAAAGAAGG TAGACAACTG AACTTGTCGA TGGAAGGGGG

12541 TTCCATTCAT TGCTCTTTCT ATCGGTATGC TGAAACCACA CATCAGAAAG TCAGGGTCCG

12601 TGGGCTGATC TTCCTCTTCG CCGACACCCA AACGGTACAA TTTCCCTAAC AACATATATA

12661 TCACAAACGC CGGGGTGTAC TTTTCCTTAA TGCAAGCACT AAGCAAGTCA ACTACCTTCA

12721 CGGGTAAGGA TCGTCTGTGC TATAGTTTCA TGAAAGTCGA TATTCTACTT GACTTAAAGG

12781 AGATTCGTTG GCGAAAGCTA GTCTCCTAAA CGAAGCTTTG GGAACTGACG GATTCCTAGC

12841 TTCACTCTGT TAGGCTGGAT TACTGGCTAG CGATTGAAGT GGTACAAAAG AGCTTGATAG

12901 ATCATTCTTT CTTCTCATTC ATTCTACTTC AACCACCCTA CAGTAGCTAG TTGGGGTCCC

12961 TGTAAATGGC TTTCCCCCTT ATTCTCTGCT TGAACAGCGG CCATAGAAAG GAACTGAAGT

13021 GGATGGATCC TATCTTCGGT TATCACTTGA GAGATTGAAT CTCTTCTGTC CTATCTTGTA

13081 TAACCCGACA GGAACAACCT AACTCAGGGA TTTCAGTTGA GAAACTACCA GAGTCATATC

13141 TAGCTTTCAA AGAAGAAGCT TACAGGGGTT ATCCCAATTT CAGTTAGGGA AGGAAGGCAA

13201 AGATAGCTAA TAGCAGCTCA GTTCATATTG GCCCGGACTT ATTCAACAAC CAGCACAGGA

13261 CCGCTAGTTC CCTTTAGTCT CTTTCTAAGA AGGACAACTA CCTTTTCTTA TCAATTAGTC

13321 GATCACTGAC GTAACTGTCC GTTAGTCTAT CTATCTGTTT GTCCAAGAAG TCTATTATCT

13381 CTTTATAAAG GACACGGCTT ATTTACTTTT CCCTCAAAGA AGTTCGCTAC AAGGTCAAGG

13441 AAACAGGCTT GCTTAGCTTC CTCAGGGCCG TTTAATGAAG TCCTTCCTGG TGAGGCGAAG

13501 CTCCAAATAA CGTTGATAGA CGCCGGAAAG GCAAGTCAGT TATTACGCTT AGGGGCGCAG

13561 AGCTTCATAA CGTCGTCTTA CGACTCAGTT TCAAAGACTG GAGCAACTAA GATAGACACA

13621 GAAAGAAGCC CGGGAAGAGA AGAAGAAAGG GAAGATAGAC GCCGGGGTTT TTCGATCAAT

13681 GCCGAATAAC CCTACCCTAT TCTATTAGCT TAGTTTCCCA GTAACCTTTT TGACCTAGGT

13741 TTCCTCAAAA TCCAATCTAT TGCAGACTCG TCGGTTTTAG GACGCCTCAC CACTAAACAC

13801 CAGCTTCACT GGTCAGTTTC CCACGCCCCA CATAGGGAGT CAAAAAGCCC CTTTTCGAGG

13861 CTCTGCTTTC TGGTTCTTTC TTATGCCGAA AAGAGCTCTT TCATTGAGAA GTTGGTACTG

13921 GAGCTGAAAG AATTTCTTTA GTGGACCCCG CAGCTAAGCT AAGAGCTAAG GCAGTTGCAG

13981 AAGAGCTTCT TTCATAATCA GATCAAGGAA TTGGGACAAC CCCAGCCTCT GAAGCTAATG

14041 CCATAAGAGT TTAATTGCTT AAAAGACAGC CAGGAGTTAT TATATCAGCA AGGACTTGCT

14101 TTGCTCACCG GCCAAGGGAA AGACTAGTTC AGGTCCGGCC AATGCCTTTC TTCCCGACTG

14161 CTTAGATGCC GAAAAGACTT GTTTTGCTGT GCTATATATG GAGGAGAAAT CAACATAACA

14221 TATAGAAAGG CCAAACCTAC CCATAAGGTT ACCAACGGGC AATGAGAAAC CCTATACTCA

14281 AAGTCTACTT TTTCCGTAAA AGTTCTGTCT TTGCTTTGAC TCCTTGAAGA CCTTTCTTTT

14341 AGATAGAAAG ATTCCCCTGG TCCGGTGATC CAGTCACCCG GAGCGGAGAA TTGTTTGCAC

14401 TAAGTAAGAT ACTTACGATT ACGCGAACTC ACCTTAAGGT ACCATCTTGT AAGTCTCATA

14461 CAATAGGAAT GTTTGGGCAA AGACCTATTG GTTGCTGATT CCCTACGGGC TAAATCCCAA

14521 CCTAAATCTA TCTTAAGGGT AAGCCTTAAC TAGTTCTTCC TCTTATGTAA GATAGATTTC

14581 TCTACCATAA GAGGAAGAAC AAGTAATGAC TATATATACT GGAACAAATG GTTATCTTGA

14641 TTCATTAGAA CTTGAGCAAG TAAGGAAATT TCTTGTTGAA TTACGTACTT ATGTCAAAAC

14701 GAATAAACCG GCGTTCCAAG AAATTTTATC TTCTACCAAA ACATTTACTG AGGAAGCGGA

14761 AACCCTTTTA AAAGAAGCTA TTCAAGAACA GATGGAACGC TTTCTACTTC AAGAGCAAGT

14821 ATAAATAAAT CGATCCGTCT ACCAGACTGC CCTGGAATAG GTTAATCGCT GGAGACAAGA

14881 ACGAGCGAAT ATAGTTTCGA GAGCATGCCT TACTCTAACT CTAATAGGGG GCGTAGAGTT

14941 TCTAAGTGAA GGCAAACACA ACTATATATG TAATATCTTA GCTGTCAGCA AGGCAGGTCC

15001 GCTAGAAAGC CTACCGGCCA GAAAGTCCTT AAGAACGAGA AAGCCAACTA AAAGGCTATT

15061 CCATAACCGA TTCTTGTTGC CGAGTCTAGG AGGAAGTAAT AATGACCAAT AAATATTCCA

15121 AAGTGGAGAG ACATTACATT AGTGGAAGAA GAGGCTTCTT CTCTAATTAC CTTAAACCAT

15181 CTAATGAACT TATATCCCGA CCGGGTAGTA TACACTCCGT CCTTAGTATA ATGCCATACA

15241 AGGATGTCCC TTCTTGGGTT TTCACTCAAA GGAATGGCCA ATATATTATC AGCTTCAAAG

15301 TCCAAGAAAG CTTGTTTGAC TTTACCTTCA TCCCACATAC CACATGACCA ATCTATTAAG

15361 TCCGAAACCT TCATGTTGAT ATCTTGTTCT CTTCTGGGAG AAATTACCTT CACTTCAAAG

15421 TTGGAGCATT TGGTAGCCAC TTATCCTTCC ATACAAAAAT GCTAGAGCCA TCCCCTACTC

15481 TCCACCTCGA CCCTTCACAA ATAACCCATT TTGCTCCATG CAAACTCCTC CAAGTGTAGC

15541 TAGGATTATA ACCAATAGTA GCATCCAACA CAAAACTCCT CGGAAAATAA CGAGCCTTTA

15601 AGACAAGTGA TGAAAGCGTA TCTGGCATAT GGATCAACCT CCAAACTTGC GGAGCCTCGT

15661 TAAATGACTC CAAGTGTCGA AACCCGATTC CACCTTCCGA TTTCGGCTTA CATATTTTCG

15721 CCCAAGATGC CCAATGAATT TGTCTCTCCT CATTTTTTGA ACCCCACCAA AACCGAGCGA

15781 TCATAGACTG GATATCACCG CAAAGGGTTG CAGGAAGTTT GAAGATGCTC ATTATATAGG

15841 TAGGAATAGA TTGGGCGACG GCCTTAATGA GAACCTCCCT ACCCGCAAAT GGCAACAACT

15901 TATCTTTCCA TCCCTTTAGC TTCTTCCGTA TCCTTTCCTT GACCAAATGG AAGACCATCT

15961 TTTTAGAATG ACCCACTTAA AGTAGGGGAA ATAAAGAGGC TGGCCAAGTT ACACTCAGTT

16021 GATGTGGTTG GCATTGTAGA AACCAAGGTA AAGCAGCATA ATGTTGCTAA AGTTCAAAAG

16081 AAATTTGGTG TTGCTTGGGA ATGGTGTACT AACTATGAGT GCTCTCATAG AGGTAGAGTT

16141 TGGTTGGGTT GGAATTCTGA TAAGGTTGAG GTTAAGATTC TGCAGGTGCA TGAGCAATTC

16201 ATTCATTGTA CTCTGCGGGC TCATTTTTCT CAGGAAATTA TACACTGTTC CATTGTGTAT

16261 GGTCTTAATA CTATTGAGCA AAGAAGGGCT ATGTGGCAGG CTTTGGGGGC TATTACTTGT

16321 GCTGGTCCCT GGGTGCTGGT GGGGGATTTC AATGCTGTTC TTTCTTGTGA GGATAGATGT

16381 AATGGTGCAC CTGTTTCTGA TGCTGAGACC AGGGACTTCA ATGACTTTCT TAGTGCCATG

16441 GAGTTGGCTG AGATCAGGAG TACTGGTGCT TTCTATTCAT GGAGCAATAA AGGGGAGGGA

16501 GAGGACCTAT TTTCCACTTT CCCTTCCAGA AAGATTTTCA GGGTGACACC CGTCACTATA

16561 GCTGATTCAT ACTTATCACC ATTGGGGCGT ACCATACTGA GAATGCGTGA ATATACATTG

16621 CCCTTTGGAA TGAATTTCCC TTCTTCGTAG GTCAAAGGGA TTGCGCTTCC AAGCGTAAAT

16681 CCAATCTCGT CACCGTATGA GACCTTCATA TTCACAATGA TTGTGAATTT AGCGTAAGAT

16741 TGAACGCCCA TGGAAGGAGA AGCATACAGT AAAAGGGGGT CCATAACACA AATACAGATA

16801 AACTCAAAGA AAGAAAAAGT AGGGAAAGGA TCACGGAAAG AATGAGAACA GACTATTAGT

16861 CCCGGATGGG GATGTCGAAC CACGGATTTC TCTATCCGTG TCATCAACAA CGACAAAGAA

16921 GATTTTTGCC GCTGTTGGAA GCCCCTAGGT ATAAGTGGAC TCATTTAATG ATGTAAACAA

16981 TACAGGCCGT TGAGCCGGCT AGAAAACATC TCCCATTTCT TCTTATGATC TTCCCATTTC

17041 ATATCCTTTG AGCCACTGCT AGGATCCTCA CAGCATACAA GGCGGGTATA CCCGACCGAA

17101 GTAGTACGTT TTAAAACGAG AGACGTTGGC ACTCCACACT TTTTATCTCT TTGTCTTTTT

17161 TTATGGTTTC AGGTAAAATA AAGGGAAATA ACCGGTCTAT ATTCTCTTCT GTAAGAACCT

17221 TATCAGGGAA CTGTTTTTCA TCCAAGCCAA GATTCTTTTG ATCATTACCA CGATCTTTAG

17281 CGAGTCTAAT GAGATTTTCA TAGATAAAAG AATTAATGAA TCGAAGGGGT GGACCCAGAT

17341 CTTTCAATAC TTCCAGGCAG GAGCACGGTA AGAACCCGCT ATAAAAGGCA TTACTAATGA

17401 AATTATCATG TACGGTGTAA ATCGGTGCTC TTATCTCAAT CATTTGTGAA ATGACCTTCA

17461 TGGCTATTAA AGCATCCTTT TGATGGATGA AATTTACGAA AGTAGAGACT TAAGTCTTCT

17521 TACGATCTCG CTTACCTTTG GAAGAGAGTC TAAGAGTCAC CTTACGTTTC TTCCTTCTCA

17581 CTTTGTCATA AACCCAAATG ATATGGGAGT CCATGACCAT AGAATTCTGG GAGGTGCAAA

17641 AGAACGGTGT GACGTAGAGA ACAGAGCTCT CACAGGTTTA AGCAAACCAG CCTACAAGGC

17701 GGATCAAACG GATCAAATTC AGTGTTCTTT CTCTTCTTCT GCAAATTGTT TATCTGATCT

17761 TCTCGTTATT TTGCTGTTTG TTCATTTTTT GGTGATTGCT GAATTTCTGC AAAATTATGG

17821 CTGTTGGAAA TGATCAATCT CAGTTTACTA CAACTTTGAA TCAAGATCCT TCAAGTGTTT

17881 ACTATATTCA TCCATCAGAT TCTTTGGCTC AACAAGTAGT TTCTGTCAAA TTGAATGGTG

17941 AAGGCTACGG TGACTGGAAA CCTTCTATGC TGATTACCTT ATCAGCTAAG AACAAGGTTT

18001 CATTTGTGGA TGGTTCTTTT CTTTGCAAGT TCCTACAGTT GGATCTGATG AGTATAAGGC

18061 ATGGAAGAGG TGTAATGATC TGGTTATTTC CTGGATCCAT GCAAATCTTG ATGTTACAAT

18121 CAAGAGAAGT GTTCTGTGTC TTCCAACTGC AAGGGAGTTA TGGAAGGATC TGGAAGAAAG

18181 ATTTGGTGTG GCTTCAATGG CACAAATCTA CTCCTTGGAG CAGAAACTGA ATGAAATCAA

18241 GCAAGGAACT AAGTCAGTAG CTGAGTTCTA CACTGAGATG AAGACAATCT GGGATGAAAT

18301 GCATGATGTA AGTCCATTTC CATACTGCAC ATGTAATTCT TGTACCTGCA ATTTGACTAA

18361 GAGGATTTAT GAGAGGGAGC AAACTCATAG AGTTCTGCAG TTCATGATGA AACTGCATGA

18421 TCAGTTTTCT ACTATCAGAG GAAATGTTCT AATGATGGAG TCCTTGCCTA AGATTACTGA

18481 AGTCTATAGG CTGTTTGCTC AAGAAGAGAG GCACAAGGAA ATCATACAAG AATGTTCACA

18541 GACTGAATCA TTGGCTTTTG CAGCAAAAAA GAGGTTTGCA GAATCTGATT CAAGGAATTA

18601 CAGGCCATCT CAGGGATTTA AGGGTGGGTG GTTATGGTGG ACAGAATTCT AATCAAAGGT

18661 TTACTGGAAC TGGAACACAA AATGTCTCAC AGAAACAACA ATTCTCAGGG AACAAAAGAG

18721 CTGGTTCATA TTATTTTTGC ACACATTGCA AAATTCCAGG GCATAGTATT GAGAGGTGTT

18781 ATAAGTTGAA TGGATTCCCA CCTGGATTCA AAGGATTCAA GGACAAGAGA GTTGCAGCTG

18841 TGGCTCATGA TGGAGATTCT GACCATTCTT CTGAAAGGAA CAATATCCAT ATTTCTGAGA

18901 AGATTACTCC AGAACAGTTG AATCAGTTGA TGAGTCTTTT GCAGAAGCAA AACCAGCAAG

18961 AAGCAAATGA AGGTGTGAGT CTTTCTCAAT CTGAAGATAC TACAGGACAT GCCATGATGG

19021 CAGGTAAATT CTGCTTTGTA ACTTGTTTCA ATTCACACTG GTGCTGGAAC AGCATGTCTT

19081 TCTGATGTTG AGGAGGCCAA GCTTTGGCAT TTGTTGGAGA CAGGCAGGGC TTTATACTTT

19141 CATTCTAAGG TGCCTGAAAG GTTTTGGGGA GATTGTGTTC TAACTAGTGC CTATCTGATC

19201 AATAGAATGC CACCGAGGTC AATTGGTTAT CAAACCTCCT TATTACAGAT TGTTTCAAAA

19261 ACAGGCTTCA TTAGATCACC TAAAAGTGTT TGGGTGCTTG TGTTATATAT CCACAAGTAG

19321 AGTACACAGG ACCAAATTTG ATCCTAGAGG CACTGCTGGA GTTTTTATTG GGTATTCTGT

19381 TACCCAAAAG GGGGTATAAG GTGCTTAACT TGGAACAGAA CAAGGTGGTG GTCACAAGAG

19441 ATGTCATATT TTATGAAAGG CACTTACCAT ACCAATATTC TGTGCAACAA GGTTCTCCTC

19501 AGCCTGTTAG TTCTGAGATT TTTCAACCCC TACATACTTT GTCCTTTTTT GATTCACCTC

19561 TCTCTTCTAC ATCTCAGACC ACACAGCCTG TAACCGGTCC AGATCAATCA GATTTCCTAG

19621 TACCACATGA GTCAGAAACT TCTTCCCCAT TATCTAATAA CACTGATTCA GCTTCTGCAG

19681 TCACACCTGA CACACTTGTA GACATTAGTA CTACAATTCC CATTACAGCA GAAAGTTCTT

19741 CTGCTGCAGT ACCTATCAGG AAAGATTCTA GGACTTCAGC TCCTCCTGCT TATCTGAAAG

19801 ACTACTATTG TCATGCTGTA GATTCAGGAG CAGGTCATTG GTGTAACATG GCATCCTTTT

19861 ATAGCTTTCC TTCTGTCCTC GGCTCTTTCT TCGGGGCTTG CGAGAGAGCT TTGACCACTG

19921 CCTTTCTCCT TTCCGGTTTC AGGAGAAAGA CGTAGGAGGT CGTACATAGA AATGATGGCA

19981 GGGATAGAAT TGAGTCACCA GGTCATAGTC GAACGATTCG TTCAGACTAG GTGGATTGCT

20041 CCCTCTGGCG AGCTCTTTTC TTTTGTAGCT CCCCGCTGTT CTAGTAAGTG TATAACTCCT

20101 ATTAATGAAG CGCGCAGCAC TCCGCGATCT CAGGGCTTGG AAGACCCTTC GCCAAAGGGC

20161 GTCGTTGCTA CTTTTTGCGT GACTACTGAT AGTGATGACC TACTTCACTC CCCACCTTCT

20221 TACATCCGGC ATTCTTGGGG ATTTCACTTC GGCATTCCCC CCTGTCTTCG TACCCGAGTG

20281 GTGAATTTCA AATTGCTGGT ATGCTTCGAT CATCCAATTC GCGTATGATA AGAAATGATA

20341 AATTCATGTA TAGGCTATCG TAGATCGGCC TTTGCCAGGA AGTCCCATAA ACCCTCGGAG

20401 GTAAAAAGAC ACCAGGAAGA ACTGCCGCTC GCCACGTTCC CTCTAAGAGT GAAAGGCAGA

20461 GAGTTATGGT CTCTCTTCTT GCGCATAGGA CTTCTTTCTT TCATAGCCAG ATAGATGGCA

20521 CATTCCCAAC TCTGATTAAG AAGGAATTTC TTCCCCGAGC AGGCTCGTAG GCAATTCAAA

20581 CATTTGGACT CCTGCGTATC CCTTTAAAAA GAAGGAAGCT ACACCTAAGG AAGCTCTTCT

20641 TCTCAGGGCC TAAGGGGCAA AGGGAGATTC GGGCTTCAAT CGGCTTTGAA CCGGCCTAGG

20701 TAGTTCCCAT CGTACCATCC TTATCTGCTT ATCAGGAGCA GGCAGCGCAT CTGGTTGTTC

20761 CTTTCTTTTT ACCCCTACTC TAGCATTTCC CGCTGGAAAG ACTTTCATTG AGCCAAGCAG

20821 ATTGCGATAG AGAAGGTGAA GCTCCAATTA GCTTTTCCTC TTTATTGTAG TTACCTATCT

20881 CTTGCTTTCA ATGCTGCTAT AACACCAGCA GACCCCCACC CTTTAGACAA TAACAACTTC

20941 AGTGCTCTGG TCTACTATTC TATCTATTTA GCTACTTCCT TTTCTTCTAC TAGGCACAGA

21001 GCTGACTTTC TTCTCAGCAA TTTTAGTATT ATTCTTCTCT TCTCTCCTTC TCTCATCAAA

21061 CCTTCCCAGC CTTGAGATAG TCTTTTCTCC ACAGGTTCAT TCAACAAGTG ATACAGTCCA

21121 TGTTTGGCTT GTCCAATTCC TTTCATTTTG TTTGAAAGTG ACTCCTGAAT GATGCATATG

21181 TCAGCATGGA AAGTCACCTT GCAGTTCTCA TGTTTCATCA ACTTACTCAC AGATAACAAA

21241 TTGAGTCTAA ACTCTGGCAC ATACAAGACA TTTTTAAACT TCAGATTGTT CTTTAACACT

21301 ACATTCCCAA CATGAGTGAA ATCAACAGCT TTTCCATTTG GCTTGTTTGC CTAAGTCTAC

21361 GAACCTTCGC ATATACTATA CTCTTATTTC TCCCCTGTGC CTAACGGCCC AGTCTACGAA

21421 CCTGAGTCTC ACAACGTTAT TCAGCTCTAC TTAACTTAGT CTATCAACTC AGTCTTCGAA

21481 CCATAGATTG TCAGCTTTCT TAGCTATGTC CCAAAGCAGC TTAGCAATGG CAGCTTTGTT

21541 CCAATCAGCT AATTTAACCA CATTCCAACC TCCACAAACC TTTGGCAAGC AAATTGGATC

21601 CCAAGCCACT AAAGCTTTCC TAGAAGATTG AGCCTTACCA GTCCATAGAA ACACCCTACA

21661 ATGCATCTCA ATTTCTTTAA GGATCTTCTT AGGCAGTACA CAAATTGGAG CCCAGTAGGT

21721 TTGCATACCA AAAAGCACCC CTTTGATCAA CCTCCACATC CCAGCAGCTA TCAATAATAG

21781 ATTGAAACTC AGAGTGATCA GCTAAGATGT TAAGGAAACG AAAGGGCCTG CCCCCACCCT

21841 GAACAGTGGT GATACAAGAG AAAAATAGAG GCGTATGATC TGAAATATTT GGCATTAGAT

21901 AATCAGCAGC TACATGAGCA AGATTCTGCA TCCAAATTGA ATTCCCAAAT CCTCTATCTA

21961 TTCTGCAACT CTCCCCAGGC CATTTCCCTT ATTAGTCCAA GAGTAATGAC TGCCAATACT

22021 TCTAAGTTCA TAAAGGCCAC AGTTATCCAA ACAAGCCTGA TAATCTGCAG TCTCATACAC

22081 TGACACCTCA GAACCATTAA TCCTATCATC AGAGTATAGG ACTGCATTGA AATCACCAGC

22141 AGTAAGCCAA CACTCACCTT GACATGAAGG AGCAATAATC TCCAACTGGC TCCATAACCC

22201 TCTTCTATCC TCCACTGTGT GCAAACCATA GACAACAGTC AGAAATGATG AAAACTTCCC

22261 ATTATGCAGG CTGACATAGC AGTGAATAAA TTGCTCATGG ACCTGAAGAA TATCAAGATG

22321 GACCTCAGAA CAGAATGCTT CCAACCAACC CAAATTCTTC CTCTAGGAGA ATGGACATAA

22381 TTATGGCACC AGCTCCAATG AGGACCAAAC CTTTTAATGG CTTTATTCTT ATTATGAATT

22441 TTGATTCTGG TTTCTAGAAG ACCAACCACA TTGATCTTTT TATTAGTCAA CAACTTCTTA

22501 ACCTCAACTT GTTTTGTTTA ATAGGGTCGT TGAGCCCCCT TACATTCCAA GTGAGTCAAC

22561 TCATCAGGAC AGATAGGGAC TTTGAACCCC ACCACCAGGA TCAGGCTCAT CCGCAATAGG

22621 ATCCTCCTCC AATAAAACTT GATAAGCATT AGACATAGAA GCACTCCCAA AGAGAGGCCT

22681 CTTACCCTTA TCTCTTGTTC TCCTGGACAC CACTTTCCAA CCCCCATCAT CATCTGAAGT

22741 TACCTGAGGC TGAGGTTGTA TAGGAGTCTC TTTCACAATA GGTTGAGGTT GAGCAATCAC

22801 AACAGGAATC TGCTCAGCAC CTTTACCCCC TTGATTACCA TTCGCCTTTT GCTGAACATT

22861 CTTAGGCACC CATTTCCTGG CCACCTGAGG TTTTGCCTGC TGAGTCTTAC CCTGCACCTT

22921 CTTCTTAATG TCACAATTGT GACCCACAAC ATTACAAACT TTGCAAAAAG GAGGGACTAC

22981 TCTACTGAGT CTTTCTAAGA GAACTACGTT TGGCTTCCGC TGATGTTAGG GTCAATATTC

23041 TAGATCTGCA TCCCTAACTA TATATAGTTT TTTCGTCTGA AGGAATTGTT AGAGTGTTAA

23101 AAGTTGCAGA ATGGAACCCC ATCAATGCAT TTAATTGTTT ACAGTCACTT TATCTCTCTA

23161 GGGTTTATGG TGCACGTTTA GGGCTGCTAT CGTGCTCCAT CCGTAATAGA TGGTGAGGAA

23221 GAAGAAGGCT GCGGCTAACA AAGAGCAAAC AACTCCCAAT GAACACTCTA CCCATTCTCA

23281 ATAAGAAAAA AATCCAGAGA TGAACCCACA GACAGGAAAC AATAGAACAC CCTCAAACTC

23341 TAACCCTGAA ATGGCATCTG AGGAATTGGT TGACTCTCCC CTTGTACATC CAAGTCCTGG

23401 GATGGTACCT GCTGGTGTGC ATGCTGCAAT TTTGGCTTTG AATCAGGCTT TGGGTCTGAA

23461 TGTGGGTAGT TCAGGAGGGT CAGGAACAGT AACCAATGGA ACAGCGCCTG CGACTGTTCA

23521 TCCACCTGCT ATGGATTCAA ATGTGGGCTC AAATGAAACG GCGGCTAGAA GATTAAAGGA

23581 TTTGAATGAG GATATAGCAA GGGCAAATGT GGGTCATGAA GACAAGAACT GTGGCTCAGA

23641 GAAGTACTAC TAGGCCTGGT AATCCTTTCC AAGTCCTTAA TGGGGACTTT GGGGAAGATG

23701 GTGTTGAGAT TATTGATGAA ACAGATGAGC TTATGGATAC TGACACAGGC CAGGATGATA

23761 CTGGTGGTGC CTCACACCCT CACCAAACTG TTTAAATGAA GGTTCCTATA GCTGCAACCT

23821 ATCTCATATT GGGGAGAAAT GTACCGCTCT CGATCAAAGT CAAAATATCA TAAAAGAAGT

23881 CAAAAAGAAA AGGTGTTAAT ACATTCTATA ACCCCCCATA CAGCGTTCTC GCTAACTAGA

23941 GAAGAAAATA GAAGAGTTAT GTTCTGTTAT GTTAGGTGTA GATACTCTAC TTGTCTCTAT

24001 CGAGCCTTCG TCTCTTTCAT TAGATTTGCG TCTCCTTAAT AGCTGGAAGT TCTCCAAAAG

24061 TGTGAAAAGC TGGAGGACTT TGTACCATCC ATTCCAGTGT AGTTGAATTC TCTTCAACAG

24121 CCCAAGGACT TGGAGCACAT CTTTTTTTCT TTCCACTGCT TAAAGTGATT GTTACGACCA

24181 CGAAGAAACA ACAAATCCCA ACTACAGAGA TATAAGAGCC AAAACTGCTA AGGGCATTCC

24241 ATCCTGCGTA AGCATCTGGA TAATCGGGAA TGCGACGTGG CATACCCGAA AGCCCTAAAA

24301 AATGCATGGG GAAGAAGGTA AGATTAACGC CGAAAAACGT GATCCAAAAA TGGATTTGAC

24361 CTAAAGTTTC AGGGTATGTT CGACCAAAGA TTTTCCCCAC CCAATAGTAA AATCCTGCAA

24421 ATAGAGCAAA AACGGCTCCC ATAGAAAGTA CATAATGGAA ATGTGCAACC ACATAATAAG

24481 TGTCATGTAG AGCAATGTCT AGCCCAGAAT TGGCCAGGAC TATTCCAGTG AGTCCCCCTA

24541 CGGTGAATAA AAAGATGAAC CCTACAGCAA ATAACATGGG TGTTTTGTAT TGTATAGAAC

24601 CCCCCCACAT GGTAGCGATC CAACTAAAGA TTTTAATTCC AGTGGGGACC GCTATGATCA

24661 TGGTAGCTGC GGTGAAGTAA GCACGGGTAT CAACGTCTAA GCCCACAGTA AACATATGAT

24721 GAGCCCAAAC AAGAAATCCC AGAACACCTA TACTGATCAT GGCATAAACC ATGCCTAGAT

24781 ACCCGAAGAC CGGTTTTCCG GAAAAAGTAG AAACGATATG ACTTATGATA CCGAATCCAG

24841 GCAAAATGAG AATATAGACC TCTGGATGCC CGAAAAACCA AAAAAGATGC TGATATAATA

24901 TGGGGTCTCC CCCCCCAGCG GGATCAAAAA AGGTTGTATT AAAGTTTCGA TCGGTTAATA

24961 ACATGGTAAT TGCCCCCGCC AGTACCGGAA GTGATAATAA AAGTAGGAAT GCTGTTACTA

25021 GAACGGACCA CACAAATAAG GGTAATCTAT GCATAGTCAT TCCAGGTCCA CGCATGTTGA

25081 AGATAGTTGT TATAAAATTG ATAGAACCTA AAATGGATGA AACACCGGAT AGATGAAGAC

25141 TAAAAATGGC TAAATCAACT GCTCCTCCAG AATGGCTGGT AATACCACTT AAGGGCGGAT

25201 AGACCGTCCA CCCAGTCCCG CTACCCACTT CTACTAAGGC TGAGCTTAAT AGGAGCAAGA

25261 GACTCGGGGG TAACAACCAG AATGAAATAT TATTTAATCG TGGAAATGCC ATGTCAGGTG

25321 CACCTATCAG AATTGGAACA AACCAATTAC CAAATCCACC TATCATCGCA GGCATAACCA

25381 TAAAAAAGAT CATTAAAAAA GCGTGAGCCG TTATTAAAAC ATTATAAAGT TGATGATTTC

25441 CACCAAGAAT TTGGTCGCCG GGTCGTGCTA ATTCCATACG AATCAGTACT GAAAAGCATG

25501 TGCCCATCAC TCCAGCAATG GCACCGAAGA TGAAATAGAG AGTCCCTATA TCCTTGTGGT

25561 TAGTAGAAAA AAGCCATCGA ACCAGATTTG TCATAAAATA AATGGATATT TTTTCCTTTA

25621 CTGTTCGGAC AGACACATCG GAAACTGGCC TATCCCGAAG ATACTTGGAA AGCGTCCCGG

25681 TGTCCTCTGA ACTGAGTTTT CCTTTGTTTG ATGTGAGTGA AGTTTTGCCC CACAAACAAT

25741 GGGAATGAGA TTGTGTCATT TAGCACACTG ACCCGTACAC GCCCTGACCC ACCAAAAAAT

25801 CGATGAATTC ACACGCTTGG ACACACAGCC AGGCGTGATT CCCATTGAGA GCCATGTCGA

25861 ACACATCGTA TCGGCCGATT GCTGGAGCCT CCACCGGGCT CTCAGTAACC GCGTTTACAA

25921 GGTCAGACAC GGTCCATCCC GGGGGCACCT CCTTACCGCG GCTCCGTATT AGATTCTCTA

25981 ATTGCGAGGA AGCCTCGGTG AAGGAGATTG GAAATTCTAA ACGCGGAAGA CGCTGTGGGC

26041 CTCTGCCTCT CATATCTCAC ATTCTATTCT TTTTCGTCCC TCCAGACAGC TTAACCTTAA

26101 CTCCGTCGAG CCTCTAGAAA TGGTGGTGAA AGCAGATACT TGAAAAGATG GTTGGTTGTT

26161 GACCAACAAA AGCGAATGAA TCCCCAACCA ACTATGGGCA TTTTCGGGGA GTAGCCCGTT

26221 TCCCATTACT CAATAGAGCA ATTCCTCGCA CATAATTAAG GGAGCCATTG AAAGGTGACT

26281 AAAACACCAG AAACGGCGAC TACCCGAGCT AATGATAGAG GCAAGAACAC TTTCCGGCCA

26341 AGTCCCATTA ATTGATCATA ACGATATCGT GGAAATGCTG CACGGACCCA TATATATAGA

26401 AAGAGAAAGA GAATCACCTT TATACTAAAC CAGATCGAGC CCGGGATCCT CTTGGAAATG

26461 GGAAGATCTA GGATAGGCGG CCAACCTCCT GGAGAAAGCG ATGTGCATAG ACCAGGTGAG

26521 TAAGGATGCA GCTCCGTGGA CCGCTCGTCG GGCCTGATAG GTGGTGGTAT CACACCCTTC

26581 TCAAAGGAAC CGTACGTGAC ACTCTCGCGT CATACGGCTC CGTCCCGGAA TAAGGACCCC

26641 TCTTTCCTTT GACCAAGGGG TTCTCGAACC AACCTGTCTT CCGCCACATA GTATATATTA

26701 AGCTTTTCAA CCCCGACGCA TATACTATAC TAAGGTCTTT GAACCGACGC ATATTATCGC

26761 TCTTCAAATC TGAGTCTTAC GCCTCAGCCT TAAGCCTCTG AGTCTATAAA CTCAGTCTTT

26821 GAACCCGCGT CTATCAACTT GGTTCGAAGA CCTTAGCTAA GCATTTCTTT CAAAATGAAA

26881 AAAACACTTC TTAGGCGGGG GCAGGATTCG AACCTGCAAT CTTCAGGGCA TGAGCCTAAT

26941 GAGTTTTCCA ATTACTCTAC CCCGCTTCTT CCCCCCGTCC GACTTGCATG TGTTAAGCAT

27001 ATAGCTAGCG TTCCTTCTGA GCCAGGATCA AACTCTTCTT TTGACTATGA TTGGGTCCTG

27061 CAGTGGTAGA ACCTCGTGAA CCGGGCGTAC TACTTCCCAA CCTTGATTCT CTTATGATTT

27121 TTTATACTAA ATAGAATAGA ATTCTCATCC GATCGTCCCA GCTTCCGAAA ATGCATGGAA

27181 CAACCTTTCT TCTTAGCTGT TATCAAATCT TTCTTCTTAG CTGTTGAAGG GCTTAATCCG

27241 AGAAACATCA ATCTTTATTG ACTAGACGGA CTAGTTTGAT TCGAGAGTTC GTATCTCCAA

27301 AACTAGCTGG GTAGCCTTTC TTTCCAAGGT CACCTTGATT CTCTTATGAT ATTGAAGAAG

27361 AAAAGACAGC TTCTTCCGAT CTTTCTATTC TTCATACTAC TTAGCTTTCT ACCTTTTTTA

27421 CCGGTAAAAC GCAAAAATGC AGATTTTAGA TCCAATCGTA GTACGGAAAT TGACTTCCTA

27481 TCAAAAATAC CGGGAAAACG GAAAAAGAAG AATTTGAAAT CCCGCCTCCG AGCGGAAATT

27541 GACTTCCTAC CTTTTTTACC GGTAAAACGG AAACGGACTA GTTTTCTGAT GCCATCTCCG

27601 AGCGGAAAAG GACTTGCAGC CAAAAATACC GAGAAAACGG AAAAAGAAGA ATTTGAGATG

27661 ATATAACGCT GAATCTGATT CTGTCTTCTA ATCCTATGAG GAAACATAGT ATGCTACCAC

27721 TTGTCTTTGT TGTTGAGTCG GTTTCTTTTG CTCAAACATA TTCTGTAGAG GAATCGGAGA

27781 ATGTTTCCGA ATCGGCTGTG TTCCTTCTAC TGATTTCATA GCTGGGATGG GTAGGCTTTT

27841 CATTTTCATT TGAATAAGAT CCAATCTCTA AGACTAAGAT AAGTAAGATA CCACATCACA

27901 TCTTTTGACG TTCGTAGATA GCAAAAAAAA AGATAGAGGA ATCCTAGACT CTTATCGGCT

27961 TTTCAAGCAA GCGCGATAGC TAAATCCAGC AAGTCATAAA AGAAAAACGG ATATAAGAGA

28021 AAGGCAACGA ACGCATAAGC ACACGAGTAC TTAGTTGGGT TGGATGCTTC TTTACGGCTC

28081 TATAGTAAGC TCCAGCTATG GATAGTTCGA GGAAGCCCCT ATCCGATACC ATTAAAGGCA

28141 GAAATCGTGA ATAACTAATA CGAACAGCGG CAGAATAGAA GCCGAAAGCC AGAGCTGACT

28201 TTCACGAATA AGTAAGGTTA CCTGTGTTCT TCACGGCTAA CTGATGATCA CCTAGGGGCA

28261 CGATTGCTCT TTCACGTTCG CACTTTCAGG AAGAGAATCC CAACTTTCTC AAAAAACGGG

28321 CATTTTCGGG GACTAGCCAA AGAAAAAGAG AAGAAATACG TTCGCTCGAG CAAATGCGCT

28381 CACTTACAAG CCTTTATGCT CGGTGTTGGT ATGCTCTATA GTCAATACAC TCGCCCAAGG

28441 CCATGCACGC TATCAGCTCG ATCAAACAAT GAAAGGCAAG GAGAATTTTG GCCACTAACA

28501 CTAAAAGGAG AGAAAAAGGT TCGAAGACTG AGGCGATAGA CTCAGCGGCG CGGTGAGCCG

28561 ATAGGCTCAG TTTCGAAGAC TGTTGTTAGG GCCGTTAGGC TAAATAACTT GGGGTAAAAA

28621 CCAGACACAA GAGCATTAGG GCTGCTGAAT GACTGAGATA GACTCGGTTA TAAGTTAAGG

28681 GCGGCTGGGT CGTTAGACAC AGTTTCGAAG ACTGTTGTAG AGTTGATAGA CTCAGTTTAG

28741 TAGAACAACG CTGAGCCGAT AGGCGAAGAT TCAAAGACTG AAGTAGCGTT GATAGACTCA

28801 GTAGCGAAGC TTCAGTAGCG TTGATAGACG CAGGTCTGAA GAACCAAGTC TAGTAGAGAC

28861 GCCGGGGCGG AGCCCCAAGT TGGTAAAAAC GCCGGATCGA AGACCGACGT ATAGTATAGA

28921 CGGCGGGAAC GAAGACCCAA GTTGATAGAC GATGGGGGCG AAGAGCTTTT TTTCTTTTAG

28981 AAGGAATCTT ACTCTCAGAT TCAGGCATTT GCCCGTTGGG TTGACTACCC TTGCTACCCA

29041 TAATACGGGC GTTTTGACGC ACCAGACATT CAATCTTTTC GATCAGAGAA GCACATCTTA

29101 CGCTAGTTTC AACACTGAAT AAACTACTTA ACACATGGAT TAATATCCAT TCCAGCGTAT

29161 GAGTTCCAAA ACAAGAGAGA AGTTTCAGCT CCTCCTCTGT TAGAAGATTC CTATAAACCT

29221 GGGTTCTTCA GCTATATGAG TTTTAGAATA AGGAACCTTC TTAACCCTAG AAAGGTTATC

29281 CCAAGTTTTC TGGAATTTGA ACTTCCCTGT CAGGAAATCC TGAGCACTCG GTAAATGACT

29341 GTTCATGAAC AACTTCATCA ACTCAGGTTG AGTATGATAG ATGCTCTCCT CGTTGTAGGA

29401 CATGGTCAGG CTTTCAATCT TATGTTGGAG CTCTCTTTTT TCTTTATAGC TAAGCTTCTT

29461 TTTTTTACCG TCTTCCAACA TTTGAAAGAC TCTTTCCTTA AATTCTTCTT TCATTTTGAA

29521 TTCATAGAAT TCTTTTTGTT TGAAAATCTC TTGGATACGA CTTTCCTCGT CCAAAGAAAC

29581 TTCATCAGAA GAGAAAACAT CACAAAGTAA TAGGTCTTCG AAGACCTTGG TCCAAAATTC

29641 CACTAAGGCC GCTCGTGCAG AAGGATTAAT TGATTTCGAT TCCACGAAGT GGGGAATCCA

29701 ACTAAGATTG AAAAGTGGAT TTTTTGGTGT TTTTACCATC CTATTCTTTC TATTTTCACA

29761 TGAAGCAAAA AGTGGGTGTT TTTCCCGAGA CTTCCGTATG GGTGTCTCTA CCCAGGACTA

29821 GACAGGTATC TTAGATTGGA TTCATAGATA CAAGCTAACT ACCGTTTATA GGTTGATTTT

29881 CTGTAAGAAT ATAAGCCTGT GTTGGTTTTA ACACCAGTCA TGAGTGGTTC TCGGCAAAGA

29941 AGCTCATCAA CTGCGGAACA TCGAACTGGT GCCAGGATTC GCTGGATATT GCTCAAATTA

30001 GAAAGAGCCC ATATCCTATC CTAGTCCTTA GCATATACTA GACTAAGCTC TTCGAACCGA

30061 CGCATATACT ATAGATTGGA TTCTTACATG AATAAGGTAA ATCTGGTAAA ATCCTATCAA

30121 ACGAGAGGAT TACCTTATCT TATCTATTCT ATTTGATCGG TCTAATCTAT CAAACTGTGG

30181 GTCGAAGAGC TGAGCTGAGT TGCAAGACTC AGATTCTCAG ACTGGGTAAT ATCGGTAGAC

30241 ACAGGAAAGA AGACCGACGT TATAGACGGC GGGGAAGAAG AGTCAAAACT GAGACTAAGA

30301 GGGGCGTAGC GAGTCGCTTA TTAGAAGCTT AAGGAATGAC TGATGTTTTC CTGTGATCCA

30361 GCTGTATTAT TAATGGATAT AATAATCGAA TTTTCGTATG GGAAAAGTAC ATCACTTCGA

30421 TTATCACAAT AAAGAGGGGT TGGTGTGGAA AGAACCACCC CTTAATCCAA TATAAATCTC

30481 CGAAATTAGT CAAATAGCAT GACATTCCGC TTCAGCACTA GAACGGCTGA TAGATTTCCT

30541 CCTTCTTACT TTTCTACGAA ATGAGATAAA GGACGAAGAG AGCAGAGATT AAAAAGAGCG

30601 TGAAGAGAGA GCGGTTAGCG AAGAAGATGA TTTCCTCCCA TCCATCCCCC TCTAGAAGAG

30661 AGAGGAAAGG GAAAAGATAG TGAGACTAAT GGGGCTCGGG ATGCACCGTG GACTGAGATT

30721 GTAACTAAAC CGACTCAAAG AACGAATACC TATGACTGAA CTGGTCACTT GACTGCGGAT

30781 GTTGACTGTC TTGAAAGACT AGGTCATCGC CCATACTTAT CTTATTGGTT TTCACACTAC

30841 TCTGCTATCA GAATAGGGCG ATAGGTATTA AACCGAAACC CTAACCTGAA CTGCTAACGG

30901 CTTCTTCTCT TGTTAGAGGA AGCCCTAGAA AAAAGTCTTT TTTATGTTAC ACGTAGCAAC

30961 TCTTCTTGTT CAATCCTGAC ATCCGCTCTC AGGAACGACG AGAGAGTGAC TAAGCCAAAG

31021 CGCGGGACTT CACTTTATTC TATGCTAATA GTCGGTACAA CTCTTCTTTC CTCCGAAGAC

31081 CCCTCTCCCA ACGAAGGCAA GTGCCACTCC TAGCGCTAAG CATAGAAAGC TCTCACGCGC

31141 GCAATAGACT CTATCAGACT AGGAATATCT TACCATTCCC TAACCCAAAG AGGTTAATCG

31201 ATGCAACTGC ACTCTGTCTT TCAAGGTATG TAGTCGCTTA CTTGATAGAG TAAGATAGTG

31261 TACTTGCTTA GTGCTTGTAT TAAGGTAGGA TGTCTTCAAT TTAATCAGCA GCCAAGGCGA

31321 AGAGAGAGTC CTACCATCAC GAGGGATTCG AGATATGATA TAAAGAGATA GCAAGCCGGA

31381 AGGACGACGG GAGATGATCG TTCGGACAGG AGATGTGGAC GAGTTTTAGC CTAGCTCCAA

31441 GAAGAAGGTA CCGGGACCTC ATTGAGCACA AGATTTGAGC GGTTAATGGA GAGCACCAAA

31501 CTCATGCGTT GGCTTTGGGG CGAGGATCAA GGAGGCCGGA TTTACCTTTA TGAACCTCAG

31561 CGTGAAGTGG TCGGGTTCAC TCCTCCTATT GCCTTTACCC AGCGGCAAGA CGCTCGCGTT

31621 TTGTCGGAAA GGGAATGCTT CTTCCCCTCT ACTGTGCGGG TGCTAAGACT AGGCGAAGAA

31681 TTAAATGAAT CAGTTCGCTT GACCAACCCG AGCCTCTAGT TCTTCTGATT TTGCTAACAT

31741 CCTTCGATGA CAGGCCGACC GAAGGAAAAC GCACCGGGAT CCGGAAATTC CCTATGAAGC

31801 TCCCTGACAA GCCCTTCAAT CCATCTTCAT CTTGGCTGGC AGCCTAGATA GATTGAGCCC

31861 TGGGACTGAT CTTCCCGTTG GCTTTGCTAC AGCAGTACTC ACAGTGTAAG GTCAGCGGGT

31921 GGCATAGCGA AATTCCTCAC CGAGATGACT GGACAACCTC TCGACCGGAT CGTCCCAGCA

31981 GAGCGATTCA AAGCGTCTTT GGAGCGAATT CCTTTGAAGT AGGAAGTAGT TAGTGCTCTA

32041 ATTGAGCGAG CCGTGGATCA TAAATGATGA GCGTAGCTTA ATTTAGCTGA TCTCACACCG

32101 AACTATAAAT AAATATGTGA GTGGCTCTTT ATAGAGACTT AGCCCAATGG CTACCACCGG

32161 AAGTGCGCTA AGTTAGTCAC AGGGAAATCT CCAAGTTCTT TCTAACCTCC GACTCTATAA

32221 ACTTGGATGG CTTGCTTGCT TGTTTAGCTT GCCCCCTCTT TGAATGTGTA CAGTTCGAGC

32281 AAGCAAATGG CTAGCAGGGC CGAGGAACCA CAATGAAGGG GACGACAGAA GTTCCACAAG

32341 AATATGACCA GAGATATATG TTCTTCTTCG TGCATGCAGG TCTGGTTCCT GAGAAAACAG

32401 ATATCTATTA GCGAGTTTCG CCGTACAATA TATAACCCGG GACTGGCTGA AATTAATGAA

32461 TTACCACGGT TGCCGCCGGC TAATAGGGCG AGCAGCGTAA TGGAGTCCCC GGGACGGACG

32521 ACGTGAGTGA GAGCCCAGAC CATAGCGGCT TTAGAGACTT CTCTCTCGGC TTTAACGACG

32581 ACGAAAACGT TCTCCGAGAG GCTTTCCTTT CTGCTTTACT GTGGTTTACC CATAACCATC

32641 AGCGGAAAGG GTTACGGAAG AGGCCAAACC AACCCAGGTG CATCACAAGT AGATACGGTT

32701 GGAGCAGCAG ATCCTATAGA AAGAAAGACA AAGCCCGAGG CAGATCCAGA CGCGTACCCA

32761 GGCGGCGCAG GCGTTATCGG GAATTGAGAC AACCCGAAGA GGGACCGTTC GCCATAATCT

32821 TATTACGTAT ATCAACAAAG AGATGCGTGC AAAGCGTCCC GTCTCTCGGT TTCGTGTTGG

32881 ACAGCACGAA TACGCTGGAT CAGGCACCCT AGCCGATCAA AAGTCTGATT TGATGAAATC

32941 CTTCGAAGAC AGACTATTCA GCCCGAACAA CAACAACAAA CTGCGCAGAG AGCTGGGAGA

33001 AATGCGGGGG TCCAGGTAAG ACGACCCAAG GAGATAACCG ACGGCCTGCC TCCGGAAAGC

33061 TGCTGGTTAT ATAGAGTGAT TGAACCCAGT TAGAGTCGGG GTGAGGTCTT GTCAGAGCCT

33121 TCCCCACCTT TAGCCCTTTC CACACCCAAC GCCCTCCATT ACATAAAGCA TTCTTGACAT

33181 CCAGCGGATA CATAGGCAAT TTTATAGCGG CAGCAACAGC AATAAGGGTT CGAACTGAAC

33241 TTTGCTACTG GTGCTAAGGT TTCCTCATAA TAAAGCCAAT ACTCTTGAGT GAGTGTACCC

33301 CTGAGCCACC AACCTGGCTT TGTATCTATC AATGGACCCA TCTGCTTTGG TTTTGACTTT

33361 GAAAACCCAT CGACATCCTT TGCTTCCCGG AACGAAAGGA CTCGCCCTAT AGAATGAATA

33421 AGGAGAGGAG GCGATAACTA TGGTTGTCTA TAGGAATCCG TGTGTCGGCT AGCACTTCGG

33481 GAGTCCCAGC TTTTTTGATC GAAAGCCTCA TCCTTTATAT CTTTAATGCA CGGGTCCTTT

33541 CGATTGAGTG CAAGATGGTA GCGATCATTT CTACCGCTTC ACAGGCTCAG GCAAAGAACG

33601 GCGCCAATCC AATAGTAAGG CACCAGGCTC ACAAGAGTCG GGGACAGAGC GAGGGAGGTC

33661 CTCTTTAAAA TATAGGAAAT TTAAGCTATG GCTAGAATCT AAACTTCTTT ACTAGCTTCT

33721 AGTTCTTGTC TTTTAGGAGG AGCGGGAAGC TTTTTAAAGA AAACAAGCCT GTCTTTTTCA

33781 CCCTTACTAA AAAAGCTAAT TTGGACTATG TCATGAAAAT GCTCTTGAAA ACTTTAGAAT

33841 TCTAAAAGAA AGAAACTGAT CAAAATCAGA AACGCGAGCG GGACTCCGTC AGAGAATGAA

33901 AAAGCGAAGT GTTGGGAGGA ACTGTATCAG CTTGACACAT CGACAGGTAG TCGTAGTCAG

33961 GTGAGCATTA TTTAGTAGCT TCTGTTTAGC TAAGGGATTA GTGGAACTTC TTTTTAGAGT

34021 GATTATTGGA TGGTATGTTT ATGACCAGTT TCAGGATTTA TTTTGTAATT AACAGAATCA

34081 AGCTCAGATA AAAGAGGAGA AGATGAAGAG TGACTGTCAG CAAGTAGCAG AGACATCCAC

34141 GGATCCAACT GGGTTAGGCC GATAATTTGT GTCGAAACTT GGGCTCTAAG AATAAGATAT

34201 AGGAGATGAA AGGAGCTCTG CGCTAGAACA GTTAAAAGAT GTTGCAGGAG AACCTGCAGG

34261 TCAAGATAAT AAGGAGGTTG CACGTTGGTT GGATATATTT CATGCAAACG AAGAAATAGG

34321 CCTCATTCGG GAAATGGGTT TTTTCTTTAC CACCAAATGG TTGGCAGTGA TACGAGATTC

34381 AGTCAGTTTC ATCGGGTGCT TGTCCCAGAT AAGGTATTGA ACCATAAAAG GAAGGCTTGG

34441 GAAGGTAAGC TTATGGGGAA AGCTTATCTC TATACTTTCA GCAACTGAAC GGTTGATGCT

34501 TTGGCTGAAC GCCTACGTCA GCTATGGAAG ATGAATGATT ACTTTATCTT AATGGAACTC

34561 CTTAAATCTA GTTGTAAGGC TGGTATAACT TACACATACC AGACTACCGA AATAGAAAGC

34621 AGATCTGGAT GGGGGCCCTT GAGAATAGAG CAGCATTTTC TTTTATTTCT TTGTCAAATA

34681 AAGTGCAATG GAGAAAAAAT GGATCTCTAG AGACGGTTGT GCTTTCCAGG GCCCTGGTTT

34741 GGATTCATTC GTCTTCTCGG TCTTCCGTGG GAGCAAGATT CAATCTTTGC AATAGTTTCC

34801 ATTATAACAA AAGAGAAAGG GAGACCAATC AAGCTTGACA CCTCCCCCAT GACTACGGTT

34861 TGCCCGGAAC CTACTGAGAC CGGATCATGA GCTACTAGAG TTCGAAAAGC ATGTCTTTAC

34921 AACACAGCGC CTATAAGACT GCTGATTTGC TGAATTTCTG CTCTTCTCTG TTTAGGGGGA

34981 ATTTGATAGG ATAGAGATCG GTCTTATAAG ATTGCCTTTA GCCACCCCTG ACGCTAGCCT

35041 AATTGAAACG GTGTTGGAGC AAAAAGGACG ATTTATCCCC ACGGTGCGGT AGACTGCTCC

35101 ATTGATAAGA ACTGCCTTCC TCCGATGTGA TTCTAGAGGA TGAACTTGCG TTGGAATTCT

35161 ATTATATAAT AAGAAATTTG AGAGAATCTC CGTCTTTGAT TCCGTAGAGA ACCGTCTTTG

35221 TCTCTCCGCT CGAGTAGGTG CTTTGGTTGA CTTTGATTCA TCAAGGGTCC AATCCCAGAG

35281 CTTCCGTCAA GTGGGCTTGC CCCGCCCGAA AGTGGGTTAC ATGGGGCTGG TGAGACATAG

35341 TAGTCACAAA GTCTCCTTAG GGAACTGGTT GAATGCAAGA AGTTCATCCG AAACCCTCCT

35401 AGTTGAGGAG CAAAAGTCTA TCGGCGGTGT ACTAGAATAG AAAGGTGCAC TATAGAAGAA

35461 GAGAGAAGGG AAGACTCTGA GTGTACGAAA AGAGCTTAAA GCACTTACTC AAATTTGGAA

35521 GTTCTGACTG ACCGGCCAGA AGGAATCAAC GAATGTGCTT AAAACAGTCT CGGCGAAAGC

35581 CGCAAAGGAT ACTCCACTTT CCTACTAAAT CTCTCCTTAT TTTGGTTACA TACCTCCTGC

35641 ATGTACTGAC TTCTTCATTT CCCTCCCCAC CTACTTCCTG GTGGCTACCA TCTCCCATCT

35701 CGCTCTAGAA TAGAAAGGGG GGAATAATAC CTGGGACTAT CAAACAAAGG TCCCACAGCG

35761 CCGACAACAG CCTAACCGGA ATTCTATCGT GCCATTTTCT CCTTTCCGGG TGGGCAAACA

35821 ACTAATGTAT TGATCAGGAC TAAAACAAAA CAAATTACAT TGGCATGATC GTTGCTTAAA

35881 ACGCGGTTTC CTTGTTATCA TGTGTACCCG ACCCTTAAGT GTGAAAAGCT GTTTCCTCCC

35941 GCGACAAAGA ATATATAAAA GAAAGGCCAA AGAGTGATCT TTGAACGCTA CTACGCATCC

36001 TTACTAATCC TTACTAATAG TATAGGGTAG GTTTGGGTAT AGCAGGACTT GAACCTGCGA

36061 CCATTAGGTT AAAAGCCCAA TGCTCTACCA ACTGAGCTAT ACACCCCCAA AAAGATATAG

36121 TAGTAAATAA GGATTGGTGC GGAAAAGAAA AGAGGGCGGC CCCTCTTCTT CTCATCATAT

36181 TAAAGGGGCG CGGCTCTGTA TGAGGCTCGT ACTGCAGAGC AAGCGAAGAA AACGTAAGGG

36241 CGCGCGTTAG CTAGGCCGTT TTCTTGCAGG AGTGCTAACG CGCCCCTTAT TGAAAACTCA

36301 AGGAAAGCCT TGATCGATAT GAGAAACATG CGCTCAAGCA CCCAACCTAT ACAAGGGGCT

36361 TGGGCTCGAA AGCCGGCCTT ACTCAACAAG CACCTTTATT AGTAAGGTTG CTTGTTTCCA

36421 CTCATTGAAG ATTCTATCTA CAAAAGAAGG TCAACGGGGG ATACTAAAGT CGCTCTCACT

36481 GACACCATCT ACGAGAAGGT GAGGTCGTCT TTCTTTCCAG CCGCCATATG GTTCTCGCCT

36541 TAAAGCCTTA AAGACGGAGA AGGGGAGGAG CTGTTATCTA TGTAATTACG GTCTTTGTCG

36601 GCCGTTGTTC CGGTCGAGCA CTCTCTTTTC TTTGTCCAAT TCCGTCTTAC CAGACAAGAC

36661 TGACTTCTGA CCAACCCGCG AAGGGTTGTG AAGTTGGACC AGGTACGAAG AATGAATCTA

36721 TATCTGTGCG CGGAAGTTGC TGGCCGGCGG CCGCTCAACT GTTCGAGCGC AATGCAGTGG

36781 TAGTTGGTTC CACAGCATGC TCCTCGCTGC CCTATGGAGT AATAAGGAAG GGGAGGGGCA

36841 AGACTCTCTT TCTCAAAGGC TCTGTTCATG CTAGCCCCCA AAGAGTCACT CGTTTTCCAC

36901 TATCTCTCAT CTGGCATCTC AGTGCAGTCC TACAGCTCAT AGCCTATCTT ACCACAACAA

36961 AAAGATTGTA GGTAGGCCCT CATATTCGAA GCGCTTCCAG AAGGCATTGC TTCCTTCACC

37021 AATCATAACA CCCGGTAAGA TGGGCTTCTG CAGATCTAAT TCATTACATA CCTTGGCAAA

37081 GAAACCACGG CAGATCAGTG ATTATCTCAT GGGGGAGACG AAAAGCTATG TGAAGTAAAA

37141 GAAAGAGGAA AGGGTCGCCG ACTGCTACTA AGAACCTAAA ATAACTTTTC AAAATGTGGA

37201 TTCTAAAACC ACTTGTGTAG GTCGGGGTTG AGAATTGGGA GTGGCAAAAT CCACGAAATA

37261 TAGCTGACCC TCTTTTCGCA ACAAGGTAGC CGTAGGGAAA CCAGTGGTGT GGCTGGATCA

37321 AATCCTTATC CTCTTCTTCC GCCTACTCCA TTCCCCGATT GACCGCCTCT CAATCCTGTG

37381 TGCTCTTTTT CCCGCCCCCG CAGTCCAGCC TTTCAAGTTC GAAGGAGGGA TGGATGTGCA

37441 TGCAATACTT CCAAATGAGG GCGAGCAGGT CTTCCTTAAT CGGTCTCATG GGTCAGAGTA

37501 CTTGGGCCTG GAAAAAGCAT CTCAAATAGC CTTTCTTTTG TAGTAAGCCG CTCGTACCGC

37561 TCCTCTAGTT CAAGTAGTTC AAGAATTAAG CTAGCTTAGT TAATCGATTT TAAGACAGGC

37621 TTACCTCTCC TTCATCCCTT GCTTCTTTGA AAGTGCTTTC CTTTGAGTGA AGGCAGCATA

37681 AGTGCATTGG TCACATACGT CCGCACACCA AAAGCCTCGT ATGCAGATCC TAGTGCCACC

37741 ATCCATGTCT GCTGAATTTG ATGCATTAAT TCGTAATGGC ACCTGGGAAC TAGTACCATC

37801 ATCTCCTCAT CAAAAGATTG TTGTGGGTCT TTCGGGTTAA GCGGAAACCT GATGGCAGTG

37861 TTGAGCGGTA CAAGGCTCGC CTCGTTGCCA ATTCATCAGC GGCCTGGGAT TGATTATTTT

37921 GATAGATTCA GCCCGCCTAT CACTATTCGT CTTTGAGTAT TACTCTATAC CATGGCTGGA

37981 CTCTTCGTCA ATTGGATGTC AACAACGCTT TTCTACAGGG TCACTTAACC GAAAAGAGGT

38041 ATTCATGTCT CAACCTCCCG GTCGATACTC ATTTTTCTTC TCTTCTCATG TGTGCAGGTT

38101 TCGAAAAGCA ATCTATGGTC TTAAACTTCG CTTCTGAGTC TATCTTAGCT ACTTCAGTCT

38161 TCGAAACTGA GTCGTTTTAC GACGTTATTC AGCTCTACTA AACTGAGTCT ATCGCCTCAG

38221 TCTTCGAACC TTTTTCTCTT ATCTTACGAG TTTTGCTACT TGAAACAATA TTCTATTCTA

38281 TTTTATTTCA ATCCAATTCG CAAGACTGAT GAAATTGGGA TTGAAGTCTC GGAAAGAGCT

38341 TAGGGATAGA ATAAGAAATT AGCTTCCTAT TCTTTACTGT AGCTACTGTA GCTACTGTAG

38401 CTATTGTAGT TTTTGTAGTT TTTGTAGTTC CCTGTTTCTT TCTCTTTCTC CTAATTCTGA

38461 GTAAAGGAGG TAGCTAAGGA CATAGAATAT GAACTAGCTT ACCCTTGTAG TTCCCTATCT

38521 CTTGCTTTCA ATGCTGCTAA TGCTGCTATT GATCACTAAC GACTTTTCTC AACAACCTAT

38581 CTTTGCTGTT GGATTAGCAT TGTTTTCTTT CTTTTTAGGA TAGAGTCAAG GTTCCTTTCT

38641 TGTTTCTAAT GAATGTAGCT ATGCAGTTAG TAGCTAATGA AGGAAAGGAA TGGCCGGGTT

38701 TCAATCCTAT TTATTTAACA AGATTGTAAG GAAATTCCCT ATGGTATCTA TCCTTAACTA

38761 CTGTTATAGA GCTCTTTTCG AGAGGAAAGG GCTAGTCGTT TCAAAGAAAA AAAACACTTC

38821 CATACTTGTA TCCAACAAAT AGGAATTACC TTTTCTACAA TATTGAATTC TAGGTTAAGC

38881 AGCATCTAAT TGCATGGATT TCACCTATCT TATGCATCTA GGTAAGCAGC ATCCACGGGA

38941 TTAGCCCCAT TCATTTATGG TTGATCACCT TCTGAACCGA AACCCCTACT TGGGAACAGA

39001 CCTTGAGGGA GAGCCTGAGA TCATAGAGTA GGGGGAGAGA AAGGGGTTGG AGAAGGAATC

39061 CGAGTTCCAT ATATGACCAA TCAAAGTTCC TCGCTGGGGC ATAATCACTA ACGAAATGGA

39121 GAGAGATGTC TTTGAAACAA GCTGCGTTGA TTATGGATCA CCTTCCACTT CTAGCATCGG

39181 GACAGACGTT AGGCTGATGA ACGAAAAGAT GCGCGAGCTC TCTCTGATGG ACATGAAAGC

39241 GGAGAGTAAG AGGGGAGATT TTCCACAAGA TGATAATAGA TCCCGGAATA AGTCTTTAAG

39301 TTCCCTCTAG GGTTTCCCTT GGGAGGGTTT GTCTAGGGGA ATACTAGGGC ATCCTCTTTT

39361 GAAGGCTTCT TCTCGAGATC TCTCGAGCTT TTTGATTCAA TTCTGTCTTC CAATTAAAAA

39421 GGGTCGAGTG AGGAGGGAGA TCAAAGAACA ATTACAAAGG TTAGTGGAGA AAATAGAAAA

39481 GGCGATGAGG ATGAACGGGA AGATACTAGC AACCTGAGTA TTGGCAATGA TGAGGAGGCG

39541 ATAGAATGGG TTGACGATGG GGCTGAAGAA GAGGCTAGGG TTGAACTCGG ACTAGTGGGC

39601 AAGATCTGGA CAGGTCGTAA TATTAATGCC AATGCTTTCA TGACCACAAT TAAGAACGTA

39661 TGGCAACCCA AGCACGGACT CGATATCAGC AACATCGGGA AGAATATGTT TGTCTTTCAA

39721 TTCTACCATT GGAAAGATAA GCATAGGGTT CTTGATGGAC AACCATGGCA CTTTAATAGA

39781 CATGCTTTTC TACTTGGAGA AATCGACGGT AATATTAAAC CCTCGGATAT GGAGTTATTT

39841 GAATTACCTA TGTGGGTTAG GGTTTCTAAT TGACCTTTTA AGGGGAGATT GAATACTGCT

39901 AATGTAGAAG CTGTGGGGAA GAAAATTGGT ACCTATGTTA AGATGGATAG CTCGGGTTCT

39961 GTTGGAATTG ATAAATCAAT AAGGATCAGG GTCTTAGTGG ATGTCCGGAG ACCACCGCTG

40021 CAAAAGGTGA GAGTAAAGAT GAGAGGTGGC ATTGAAGAAT TCTTTGATGT AAAGTATGAG

40081 AAACCACCGC TATTCTGTTT CTATTGTGGT AAGGTCGGTC ATGGTGTTAA GGATTGTGAC

40141 GACTTTAGAG ATGAGGAGGA TCCTCAGTTA TGTTATGGTG GGTGGCTCAA AGCCTCTCCA

40201 TGGAAGCACA GTAGGGCCAA GGATTTCGAG AAAGGGGATA ATTCGGCTCC TAATTGTGCT

40261 AGGGGCCTTT TTGTTACGAA ACCCAAAGTG AACAAAGAGA CGTTATCGAA GGAACAAGTG

40321 TCAGAGGTCC TGGACAAATT GAATGTCTGT GTAATTCATG AGAACCATGA GGTGAATGAA

40381 GCGGAAATTC AGAACACCCC CGTGAAGAAT GATATGTTGG AGAATGCAGT AAAGGGTGAC

40441 GATAACCGCT ATCAAGAGAA TTCTGTAACT AACAAAACTA CAGAATCCCA AGAAGTCTCC

40501 CATGAGCATA ATTTTGTGAA CGTAGGCGGA AAGGAGGAAG GAGCTAAATC GCATGCAAAG

40561 AAGAAAAAAT GGACAAAAAG CAGGTCCTAT CTCTTCTGCC AAGGGGAGTG ACTTGTCGGG

40621 CTCTATTAGA AAAGATAGAG AGATAACACA GGAAGGAGAT GACCCTATGG AGATGGATGC

40681 ACCATCTATT ATCAAAAAAC GAGTTGTTGA GATTGCAACG CTGGAAGAAC AGGCTGGTGA

40741 AGATGCTTAC GTGAAGGTGG CGGGCCCCAC ACCATGGGCT CTCGGTGAGC AATGAAGTGT

40801 GTCCTAACCT GGAACTGCAG GGGTTTGGGG AGCCCTCATG CATGCAGTCA ATGCGTTAAA

40861 ACGCATTGTG TTCACTGAAA ATCCCTTTTT TATTTTTCTC CAAGAAACTA AGTTAAGCCA

40921 GTATGAGATG GAGCGAATCA AAACAAAACT GAAGTGTAGT GGCATGTTGG CCGTGGGGTG

40981 CATGGGTGAA GGGAGGAAAA GAAGAGGTGG AGTTGCATTA CTGTGGAGAA ATGATTGGGA

41041 TGTGGATATT CAATCTTATT CCCATAATCA CATTGATGCG GTAATTAATA ACTCGGAGCA

41101 TAATGAATGG CGATTCACGC GGTAGACCAG CGGTTGAGCA TGGCTATGGG TCCTTTTATC

41161 ATGAAGTAGC GGAGGTGGTT CATAACCCAC CCCGCGAACA ACAATGAAAA TCTTCAGTTG

41221 GAACTGTCGA GGGCTTGGCA ACCCTCGAAC AGTTAATTCT CTCCGAGATA GATGTTGGAG

41281 AGAGAGGCCA AATATCGTCA TATTTTTTAA TGGAGACGAT GGTGGATGCG CATGCTTTGG

41341 AGGTGGTACG AAATAAGTGT GGTTTTTCGA GTGGCGTTTG TGTTAGTAGT GAGGGTAATG

41401 CGGGTGGCAT GGGGTTCTGG TGGCAGGACA TGGAGGTTCG TACAGTGTCT TTCTCGGCGC

41461 ACCATTTTGC TGTGGAAGTG TTGGATACGG AGGGGAATGC CACGTGGAGA GCTGTTGGGG

41521 TGTATGGGTG GCCGGAGCGG GACAATAAAT TTCGAACATG GGATTTAATG AGGTCCCTTA

41581 AACAAGAGAG TTCCCTGCCT ATTCTTTTCT TTGGGGATTT TAATGAAATT CTTAGTGATG

41641 TTGAGAAGGA TGGGGGGGCG CAGAGGAGTG AAAGGTGTAT GGATGGTTTT AGGGGTGCGA

41701 TGGATGATTG TGAAGTACGT GATCTAGGCT ATAAAGGGAG TATTTTCACT TGGCAGAGGG

41761 GTCTATCCCC GGGGACAATG ATACGGGAAA GGTTGGACCG GGTGCGATGA GTGGAGCTTG

41821 ATGTTTCCTT GCGTTGAAGT ACAACATTTT CCTATTCACA GATCGGACCA CGCACCAATA

41881 ATGTTGAAGG CTGGACGAGC TAACGAAGTG CGGAGTAAGG AGAAGTTATT TAGGTTTGAG

41941 GCCTTTCTTT TGGTTGTCCA AGGTGGAATG TGAAGGTGTG GTGCGAGCTG CGTGGGAAGG

42001 CAGCGCGGGT GAGATGGCGC ACGTGAAGCT GGCAAGGTGT GCGGCCAGAG CTGGGGGAGT

42061 GGGCTAAAGC TACTTTTGGG GCGCTCCGTA AGCGCATTCG CAAAGCTGAA AAACTATTGA

42121 GCAGGCTGCA ATCAAGAGAT ATGGACAGCA ATAATATTGA ACATTGTAAA CGGGTCTCTT

42181 TGGAGTTGGA TGAGCTGCAC CTTATGGAGG AATCTTATTG GCATGCCCGA GCGCGCGCGA

42241 ACGAGCTAAA AGATGGGGAC AAAAATACCT CATACTTTCA TCATAAAGCT AGCTCGCGAA

42301 GACGGCGAAA TACTATCAAA GGGCTTGAAG ATGATGCGGG TTGCTGGGTT ACGGACCCGG

42361 GGCAAGTGGA AGCAATTATA ACTAACTACT TTGAGAACAT CTTTACTTCG AGCCTGCCCA

42421 CGGTTATTGA TGAAGCACTG AGTGGTTTGG AGTCGCGAGT GACGGAGGAC ATGAACCAAA

42481 AGTTGCTGGA GGAACCAACA AGTGAGGAGG TTCGAGCCGC GCTTTTCGAT ATGCACCCAA

42541 ATAAAGCCCC GGGTGTTGAT GGTATGCATG CACTTTTTTA TCAAAAATTC TGGCATATTG

42601 TTGGCCCTGA TATTGTTGAT TTTGTGGTGG GATGGTGGAG GGGAGTAGTG GATATTTCGG

42661 AAGTGAATAA AACGTGCATT GTATTGATAC CAAAATGTAA TGAGCCACTT AAAATGACTG

42721 AGTTCCGCCC TTTGCAACGT GCTTTATAAA ATTCTCTCCA AGACTCTTGC TAATCGGGTC

42781 AAACCGTTGA TGTCACAAGT GATTCCCCCG TTCCAAAGTG CATTTGTTCC AGGTCGCCTC

42841 ATTACGGATA ATGCTTTGGT TGCCTTTGAG ATTTTTCATG CCATGAAGCG TCGTGGAGAG

42901 GGTAGAAATG GTACGGTTGC TTGAAAGTTG GATATGAGTA AGGCCTACGA TCGGGTTGAG

42961 TGGGTTTTTC TAGAGCATGT TATGCTTCGG CTTGGTTTTG CAAGTGATTG GGTTCGGCGT

43021 GTTATGGGGT GCGTTTCTAC TGTCTCCTTC ACTTTCAAAG TTAATGGTGC AAAGGTGTGT

43081 AATGGAGCCC CTAGAATACC CCATCTATTT TTTGCCGATG ACAGTATCTT ATTTGCTAGA

43141 GCTAATCTCC AAGAATGCTC AAAAATTGCT AGTATTATTA GCACTTATGA AGATTCAAAG

43201 ACTGGGGTAA CGCCGATAGA CACAGAAGCG AAGAGCCGAG TATAGTCTAT ACGAAGGAGC

43261 GAAGACAAAA GGTAGTGGAA ATCAAAATCT TTCTACACCA TCATTCATTG AGTATTTTTT

43321 GCCTACTTGA GACAAGAGTC AAAAGTCATA ATTTTCAGAA AAGTTGTAAG AAAGTTAATA

43381 GGACCTGGAC ATGGGTTGCT AACTATCAGT GTTCTCCTAA AGGGAGGATT TGGTTGGGGT

43441 GGAATGCAGC TGAGGTGGAC TTGACTGTGC TGGAAGTTCA GGAACAATTC ATCCACTGCG

43501 CTGTTTCTAG CAAGCAGTCT GATGTGTCTT TTGTGTTTAC TTTGGTGTAT GGCCTTCATT

43561 CTGTGGAAGA CACGAAATGT TTATGGCTTC AGCTTCAGCA GATCTGCTCT GTACTGAGGG

43621 GTTCTAAATG GCTTCTCATG GGAGATTTTC ATGCTATGCT ACATATGGAT GATAGGCTTC

43681 ATGGTGCTCC TGTTAGTCTC TATGAGATTA GAGACTTTTC TCATTTCATA CAGTCTTCAG

43741 GTTGTAGTGA GCTGAGGATG GTAGGGTGGT CTTATACCTG GTCCAATAAG GCTATTGGTG

43801 ATTCTAGAAC TTATTCTAGA ATTGAGAAAG CTCTAGGTAA CCGGGAGGAT TATAGTGCTT

43861 TGCAGGTTGA GGTTCTGAAT CCTTCTATTT CAGATCATTC ACCTCTTCTA TTGACTATGC

43921 GGGTTGGAGG AGGAAGGCCT TTTAGGTTCT TTAATCACTT AACTGATCAT AGTCAATTCT

43981 TGCCTATTGT TCAATCTCAA TGGATGCAGG CTGTTTCTGG CAGTTCTATG TTTCAGGTCT

44041 GGAGGAAGTT GCAGGGTATT AAGGCTCAAC TTCAAACCTT GCATGCAGAG GAATTTGCAG

44101 GCATACACCA TAAAATTGCT CAGGCTCAGA GTGACCTGGA TATGATTCAG AGTGGATTAA

44161 AGGATGCCCT GGATGATGTC ACACTGCAAC AGCAAGAACA GCAATGTGTC TCTACTTTGA

44221 GGAAATGGTT TCAAGTTATT GAAGCTGCTT TACAGCAGAA AGATAGAATT ATGTGGCTTG

44281 GTGATTCCAA TCATCATTTC TTCTACTCTT CTATGTTGGT AAAATAAAGG ATTTTATTAA

44341 ACCAAAGTAA GCTGTAAAGC CCAACTTACA AGCACAGAGT TACAATCAAA CTAGTTCAGA

44401 ATATGACTCC TAGCTAATTT CTGAACATGC AAACAACGAA AACACATCAG AGTTTTAACA

44461 TGTCTAACAA GCACATCAGG TTCACAATGC TGCTGCATGA ACCTCCTACT ATTCCTTTCT

44521 TTCCGGAGTA CTTAGAATCT TACTAGCTAC CTCGGAGAGG GAATATATTT CAAAAAACAA

44581 TCTCTTTTAG CTCCGTTCAT CCGCTCGCTA CGCTTTGGAG AAAACCTACC GAGGGGAATA

44641 GAGTAAGGGA TTCCTTAGCT TGAGGTTCTT GCAGTTCTTG TAGCTATTGA GGTAGGGGTT

44701 CGGACAAGCT GAGTGAACGG ATAGGATAAG CCAGCTTGAA AAGAGAAAGC AGAAAAATCA

44761 TAAGAGAATC AAGTATGCTT AAGTCAACAA GCAACGGGTA AGCGCGCTAG CGCGAAAGCT

44821 TATTTAGTTA TTAGAGGCGT TAGTCACGCA AGCCGTTTTC TTGCTCCGAT AACGCCGCTT

44881 CTTTTTTTCG TCGAGATTGG GTTGGTCTTC AGTGTACTTT CGTACAAGAT CGAAAAGAAT

44941 GCATTGGATG GATGCCCGGG CATTGAGAAG GAAGGACGCT TTCAGAGGCG AAAGGCCATG

45001 GGGAGATACC GTCTGTGATC CATGGATCTC CGATCGGGAA ACCGTATCCA AGCTCCGTGG

45061 CTAGTCTGCG CTCTTTGGAC TTTTCAAACT TAGCGAACTG AAACATCTGA GTAGCTAAAG

45121 GAAGGGAAAT CAACCGAGAC CCCGTTAGTA GCGGCGAGCG AGAGCGGATT GGGGGTTTGA

45181 AGAAAAACAA ACACGAATAA GAATAGAAGT GTGAACTTCT TTTTCGCCAG GTTTCATTCG

45241 ATTTGTTGTG GATTGGATGA TGGAAAAACC AGCAAGCTAC GGCTGAAAGG CTTAGTAAGC

45301 TTGAAAGCCA CTTACGCCTA TTTCTTAGGC TCCAGGGCGC AGGGAACTGT AATTGTGAAA

45361 AGGTTGGAAG ATCTGGCCAA AGAAGGTGAT AGCCCTGTAT CTTCGTTCCC ATGGTTCGAT

45421 CCTTCCCAGT AAAACGCGGC GTGTTCGAAT TCTGATCGCT TTTACGCGAG AAAGGGGGAC

45481 CACCCTCTAA GCCTAAGTAT TCCTCAATGA CCGATAGCGT ACAAGTACCG TGAGGGAAAG

45541 GTGAAAAGAA CCCTATTTAG GGAGTGCAAT AGAGAACCTG AGATCCGATG CGAACAATCA

45601 GTCGAAGGAG CGGAGCAAGA AAACGGCAGC GCGTGACGGT TTTCGCGTCA CCCGTTGCTT

45661 GTTCCTTTAC TTTTGATTCT ATTAGTAAAG CGCACTCACT CTAACGGCGT ACCTTTTGCA

45721 TGATGGGTCA GCGAGGAAAT GGGAACAGCG GCTTAAGCCA TTAGGTGTAG GCGCTTTCCA

45781 GAGGTGGAAT CTTCTAGTTC TTCCTATTTG ACCCGAAACC GATCGATCTA GCCATGAGCA

45841 GGTTGAAGAG AGCTCTAACA GGCCTTGGAG GACCGAACCC ACGTATGTGG CAAAATACGG

45901 GGATGACTTG TGGCTAGGGG TGAAAGGCCA ACCAAGATCG GATATAGCTG GTTTTCCGCG

45961 AAATCTATTT CAGTAGAGCG TATGATGTCG ATGGCCCGAG GTAGAGCACT CAATGGGCTA

46021 GGGTGGCCCC CATTTCGCCT TACCAACCCC AGGGAAACTC CGAATACAGG CCTAGATCGT

46081 TTGTACAGAC AGACTTTTTG GGTGCTAAGA TCCAAAGTCG AGAGGGAAAC AGCCCAGATC

46141 GTACGCTAAG GTCCCTAAGC AATCACTTAG TGGAAAAGGA AGTGATCGAG CGATGACAAC

46201 CAGGAGGTGG GCTTGGAAGC AGCCATCCTT TGAAGAAAGC GTAATAGCTC ACTGGTCTAG

46261 CTCCATGGCA CCGAAAATGT ATCAGGGCTC AAGTGATTCA CCGAAGCGAC GAGACCTTGA

46321 AAGCAGCTTT TTCAAGTGTC AGTAGCGGGA CGTTCTGTCA ATCGGGGAAG GTTTTTGGTG

46381 ACAACACCTG GAGATATCAG AAGTGAGAAT GCTGACATGA GTAACGAGAA ATCCTGTGAA

46441 AAACACGATC GCCTGCCAGT GGAAGGCTTT CTGCGTTCAG TCAATCTACG CAGAGTGAAT

46501 CGGTCCCTAA GGAACCCCCG AAAGGGCTGC CGTCCGATGG GTACACGAAA GTGACGAAGT

46561 TGCTTTGACT ACAGAACCAT GCCTGTCTGT TGGAGCGAAT TGGATGATCG GGCCGACTCT

46621 CGTCGCCTCT TCCCCTCACT CTCCTTTCCC TAATATGAAC CTTGAGTCAT CAAAGCCTTT

46681 CTGACTTGGC CTGGCCCGGT CGCCCTACGC GACTGGCGCT TCAAAAGGTA GTTTCTACTT

46741 GCTTACTTGT TAGAGTAAGG TTCAAAGACA AGTCTAGTAT AGACTAGGTT CGAAGAGAGA

46801 CTTATAGTAT AGTATATGCT AAGGTCGGAG GCGGACACTT TTTGTTATCT AAAGGCGAAG

46861 ACTGATCAGT GGGCGAACAC TCGGCCCAGC GGGCGAACAT GCCGGGCTCC GGCTCCGCGC

46921 ACCTGCTGAC ACCTTTCGAA GCACTTTATA GTGTGCGCTT TAGTTTTAGA ATGTGTCGTT

46981 CATCCATACT TGTTCCAAGT AAGTGAATTG CATTACCATA CTCTAACGAG TAAGCAAATA

47041 GGAATTACCT TACTTGTTCA AGTAAGTGAA TTGGCATTAC CTTACTCATT CAAGTAAGCA

47101 AGTAGTCGAG TTCCTTCGCC TTACGAGTCT ACAAGCCTTT CTCATTTCAG TGCTCGAGCT

47161 TGAGCTGATG TCAGCTCAAG GGGCTGGATG AAGTGTCTGG TTTGATAGAA CCAGGTTCGA

47221 AAGACTGAGG CGATAGACTC AGAGGCGGAC GCGCTGAGCC GATAGGCGAA GAGGCGAAGA

47281 GCTGAATAAC GTTGATAGAC GAAGGGGCCT TTAGTCGAGT AGAGGTTTCA GCAAGCAGAA

47341 CCTACCATAG TCGCGAGTCT GTTTATAGTC GCGACTGTTG TCATAGTCAA CAAGGGCGTT

47401 TAGGCTTCCA GGAAAAAACT TCGAATTGGG AGGGCGATCC TCCCGGTGAA CTGACCGTAC

47461 CCCAAACCGA CACAGGTGAA CAAGTAGAGT ATACTAGGGC GCTTGAGAGA ACCATGTCGA

47521 AGGAACTCGG CAAAATGACC CCGTAACTTC GGGAGAAGGG GTGCTCTCCT ATCTTTTGAT

47581 TAGGAAAGCG GCACATACCA GGGGGTAGCG ACTGTTTATT AAAAACACAG GACTCTGCTA

47641 AGTGGTAACA CGATGTATAG AGTCTGACAC CTGCCCGGTG CTGGAAGGTC GGAAGGAAAA

47701 GTGTTATAAG CTTTGAATGG AAGCCCCAGT AAACGGCGGC AGTAACTCTA ACTGTCCTAA

47761 GGTAGCGAAA TTCCTTGTCG CATAAGTAGC GACCTGCACG AATGGTGTAA CGACTGCCCC

47821 GCTGTCTCCG ACATGGACCC GGTGAAATTG AATTCTCCGT GAAGATGCGG AGTACCAACG

47881 GCTAGACGGT AAGACCCCGT GCACCTTTAC TATAGCTTCG CAGTGACAAC CTTGATCGAA

47941 TGTGTAGGAT AGGTGGGAGG TGGTGACACA CAACGACCAA TCCTGAAAGA CCACTCTTTC

48001 GTCTAAGGAT GCCTAACCGC CGCACCGATC ATTCGGGGGA AGGCGGGACA CTGCGAGGTG

48061 GGTAGTTTAT CTGGGGCGGA TGCCTCCTAA AGAGTAACGG AGGTGTGCGA AGGTAGGCTC

48121 AAGCGTCTAT TCTGCTCGTG AGCGTAATGG TATAAGCCTG CCTGACTGTG AGACCGACTG

48181 GTCGAACAGA GACGAAAGTC GGCCATAGTG ATCCGGGAGT CCCGTGTGGA AGGGCTCTCG

48241 CTCAACGGAT CAAAGGTACG CCGGGGATAA CAGGCTGATG ACTCCCAAGA GCTCTTATCG

48301 ACGGAGTCGT TTGGCACCTC GATGTCGACT CATCACATCC TGGGGTTGAA GAAGGTCCCA

48361 AGGGTTCGGT TGTTCGCCGA TTCAAGTGGT ACGTGAGTTG GGTTTAGAAC GTCGTGAGAC

48421 AGTTCGGTTC CTATCTACCG TTGGTGTTAA AGGGAGAACT GCGAGGAGCC AACCCTAGTA

48481 CGAGAGGACT GGGTTGGGCC AACCTATGGT GTACCGGTTG TTATGCCAAT AGCAGCGCCG

48541 GGCAGCTAAG TTGGTATGGA AGAACTGCTG CGCCGCGGGA AATCCTTCTC TATACAAGTT

48601 CTCGGACGAG GTTTTTGAAC AGAACTTCGA TAGGCGAGAG GTGTAAGCAC CGCGAGGTGT

48661 GAAGCGATCT CGTACTAAAC GAAACTACTT TCACTTTCCA TAACCAAAAT GAAAGAAAGT

48721 CAACGCTCCG CTCCATACTT GTTCCAAGTA AGTGAATTGC ATTACCATAC TTGTTCCAAG

48781 TAAGTGAATT GCATTACCAT ACTTGTTCCA AGTAAGTGAA TTGCATTACC ATACTTGTTC

48841 CAAGTAAGTG AATTGCATTA CCATACTTGT TCCAAGTAAG TGAATTGCAT TACCATACTT

48901 GTTCCAAGTA AGTGAATTGG CATTACCTGC AATTGCGGTC AGTCTCGCTA CCTCTTGAGT

48961 TGCCGCCCCC TACTTGCTCA TTCGCAATTA CTACCACCTC TACCCCGGCC AAGCAACCAA

49021 AGCCGGGGAC CTAGGTGAGA ATAGGGAAAG AAAGAGAAGA AGCGGGGTAG AGTAATTGGA

49081 AAACTCATTA GGCTCATGCC CTGAAGATTG CAGGTTCGAA TCCTGCCCCC GCCTAAGAAG

49141 TGTTTTTTCA TTTTAGGTAT AGATGGTACT GGACAAGCTC TTAGGGAAGA ATCTCTTTCG

49201 CCCTTATTTA TTTCCGGACT TTTTTCTATG AAAAGACAAA TCAAAAATTT CACTTCGAAT

49261 TTCGGACCTC AACATCCTGC TGCTCATGGT GTTTCACGAT TAGTATTGGA AATGAACGGA

49321 GAAGTGGTGG AACGTGCAGA ACCACATATT GGATTACTCC AGTGCGGCAC GAAGCCGCTG

49381 ACGCCGAGTC GGCTCCTATG CCGCTAGCTA TGCTATGCCC TGCTTGGTCC CCCGGCACGC

49441 TTAAGGTTCC GTAGCGCGTT ATGAGCACCG GGCTAAGGGG CGGTTGAGCA ACTCAAGCGA

49501 ACCGCCCTAC CTTATTACAA CATAAGGACA GAAGGGAGAA GGTTGTGAAG GTGGCCTCGT

49561 TATCTACATC CCCGGTCGGG AGAATAGAAT AGAATAGAGG ACCGACCGAG ACCCGGGTTT

49621 CACGAGCGTT GGCGGGTCCT GGAGTGCCTG TCAAGGGCGC TAGCGCATAC CCACCCCGGG

49681 GTGATCATCA CCACCTGCAC CTCACATCTC GGCACAGTGG AACGTGTAAC CCGCCTGCTG

49741 TCCCATTTCA CTACATTTGT TCCTCTAATC CATAGCCTAA CAGAACGCAG CAGCGAGGGG

49801 CAACCCGCCC ATACAGCCAG CGGGGAGGAT GGCACTACTG GCAAAGACCG TCTGGCGAAA

49861 ACGCCGCAGG CGCGAAGCGG GGTAGGCCTG CGCCGAGGGA GCATAGCATA GGGAGGAACC

49921 CGGACGGTGG AAGAACCGGG AGAGGCCAGG TCATTTGACG GAAATGTAAG GCTTCCCCCT

49981 ATTAGAGAAG GCCCTATGGG GTAAAGGGAA GTGCATGAAT TCTTAGAAAA ATAGGAAGCG

50041 AGCCTATATA ATGATAATAT AAAAAAGAAA ATTCCATGAA CAGATAGAGT CAACGGTACA

50101 ACAGAAAGCG CTGCCTACAC GCGAATTTGC TTCCGAGGTC GAGCAGTCTC AATGAATTTG

50161 ACTACAGGTG GTCCGTAGGA ATGCTGGGCT GGGCCACCTC GAATGGCGTG AGCCGCATGC

50221 GGGGAGACCC GCACGTACGG TTTTTAGGGG GATCCGGTCG AAAGACCGGC CGGCGCCCAC

50281 CCGACTAGAG GGACTGAGAA ATTAATAGAG TACAAAACTT ATCTTCAAGC TTTACCTTAT

50341 TTTGATCGTT TAGAGGGCGA TCGCGGAGTC ACTGAATGAA GTCCTCCGTT TCTTTCGGAG

50401 ATGCTGACCC GCAGCGAAGC AGAGATGACT AAGTGACATA TAGAATATGG CAACGACAAC

50461 AGCATGTCGT AGAAGGAGAT AAGAGGTGGA GCCAACGACC CACTAAGACT AACGTATCTA

50521 CAACTACATC CCCCGAGCGG CAGTCAAACG AGGGCGTGAA TGCGAGATGC CAGCGGAATG

50581 ATCGGCCGGA CAGAGGCTAG GGCAGCTTTC TTCCCCACCG CGTCTTTCCT TGTGTGTCGG

50641 AGATATAAAG CGAGTGCACC GGAAAAGAAC GGGAACTGAC TCGATCTATT CTATGGCGAA

50701 GCATCCAAAG CATAACTGCA CACTCACACG ATCTTTGCCG AGAGATAAGA GCATTCGGTG

50761 AAACCGGTGA ACTACACTAT CTTCTGGATA GATGTGTGGG GCAGAGGGCT CGTGGTACCT

50821 CCTGCTCACC CTTCCTCCTC CGCTTTGAGA ACCGTGTGAA CGGAGAGTGG GCAGAAGGGA

50881 AGGAGGTCCT CATATGGAGT CGCACACTTA CTTGAGCAGT GCGAGAGACT GGGAAATGGG

50941 TTGAGTCAAC TCCCTCCCGA AAAATAACAG ACAAAGCTTG ACTTAGATAG TGATTTGTAT

51001 TTCTTTTTTC TTAGTGATTG GAAAGTGGGG CTCCTATTGA CTAGACGTCA ACCTCCCTCA

51061 ATCAAAGGGA GACCCGTTTC AATACTAGTT TTTAGGTTAT GCTGTCATTT TGACAATATC

51121 ATTGAATAGC ATGGCCTGGG GCTAAGGTAA CTCAAGTAGG AGAGCCGTGT TATGGGTGAC

51181 CTTATTGCAC GGTTCAGAGA GCACTTGTGT ATGTGATGCA AGTGAACGTG TACGAAAAAG

51241 CTGTATCTAG GGTGAGTTCT TCGTTCCGTC GTCGACCCTA TCTATGTTTC TATGATGGCC

51301 CAAGAACACG CTCATTCTTC AGCCGTAGAG AGACTTTTGA ATTGCGAGGT ACCATTACGA

51361 GCTCAATATA TACGAGTGTT ATTCCGTGAA ATAACTCGAA TTTCAAATCA TTCACTTGCT

51421 TTAACTACTC ATGCTATGGA TGTGGGAGCA TTAACTCCGT TCCTGTGGGC TTTTGAGGAG

51481 CGAGAGAAAT TGTTGGAATT CTATGAAAGA GTCCCGGGAG CCAGGATGCA TGCCAGTTTC

51541 ATACGACCAG GTGGAGTGGC ACAAGATCTG CCTCTTGGCT TATGTCGAGA TATTGATTCC

51601 TCCACACAAC AATTTGCTTC TCGTATCGAC GAATTAGAAG AGATGTCAAC CGGCAACCGT

51661 ATCTGGAAAC AACGATTAGT GGATATTGGT ACTGTCACTG CGCAGCAAGC AAAGGATTGG

51721 GGATTCAGTG GTGTAATGTT AAGAGGTCGT GCGACATGAA GACATTGATA GCAATATGGG

51781 GGAAGTTCCC ATCAGGCAAC AGCGGTTCTG CCTGACCCTA CTAAAGCATG CATATTATGT

51841 CAGTGAAGAC TTGGTGTGAA GCCTTGGAGC TTACGTTGGA AGAAGGCCCG GGGCTGGGGT

51901 GAGTTGAGGG GGGACAGCGT AAGTGAGCGA ATGTGTGTAA GCCCAGTCAA ACATGAATGT

51961 TCTAGGTGGG GCGGGCCACC CGCCTTCGAA TGGTGTTGGT CCGTAGGACC GTGAACGGAT

52021 TCGCCTCTGG CCTCTGGGCA CGTCGGAACC GCATGAGTTC ACCGGGGTGG AGCACAGTCC

52081 GCCAAAATCG GCATAGGTTA AGTGCTATTG ATGGAACATG GTAAGCCTAT CTTTCTCCAT

52141 ATGGAAGTGC TGCGGGCACA TAGAGATGTG GGTAAAGGAA GCCTCAAAAA GCGAAGGCCG

52201 TGTAGGTCGC GTGACCTGCA CCGAGTTGGT GGCTGACTGG GCTTTTTCCT TGATCAAAGA

52261 AAGCAGATCA GCTCGCCTTC TTGTTATCAT AAAGTTGGTC GAATCGGGCC CCGGAACGTC

52321 GAATGAAATA AGTGGCCGGG TTCTCTTTTT ACAACCCTTT TTATATGATA GGCCCGGCCC

52381 CCTTCCCCTT ATGTTTAGGA GCGGGATCCC CCCAAGAACG ACCATTCTTG TGGTGGTACG

52441 GAAGGCGTGG ACTCCGCGAA CGTCCCGCGC CCCCCCTTAT TAGTAAGGCA GGAGAAAGAA

52501 AGCCTCAACT AGAACCACAT TCATTCCCGA CGCATAGTAT ATACGTCGCT CTTCAAACCT

52561 TTTGCATGCG GATGTAGTTA AGTGTCTGAC TCTATTGGTC ATAGTTTCCT GCTGTTGCGG

52621 CCGGTGCTCG TTTGCGCGCG CGTGAACCAA CCCAACAAAG AAGGAAAGGA TGCCCGGGCA

52681 TCTGAGAATG ATTCGAGCCG TATGAAGGGA AACTCTCAAG TACAGTTTGT TTTTTTTGGG

52741 GGGGGGGGAG GAGCCCGACA GGGTCCCCCC ACTGACTTGG CTCGGGCCTA AGCGAAAGTG

52801 AAGTGGTGGG CCTACCCATC CCAACCAGGG GTATGCTGGG ATTTGCGAAG AGCAGCACCT

52861 TACGATGTTT ATGACCAATT GGATTTTGAC GTACCAGTAG GTACCAGAGG AGATCGCTAT

52921 GATCGTTACT GTATCCGTAT CGAAGAGATG CGACAAAGTG TTCGGATCAT TGTGCAATGT

52981 CTTAATCAAA TGCCTAGTGG CATGATCAAA GCCGATGATC GTAAGCTATG TCCTCCATCA

53041 CGATATCGAA TGAAACTATC CATGGAATCG TGCGCCGTGT GAAACGTAGA TCATTGCCGT

53101 TCTTAACCGA GACTCAGGTT AAGCTCCGTC TCGGAACCAT GTGGGGTTAG GAGTAAAGCA

53161 TCCCGAGGTT GGCGCATCTC GTTGGGCGTG GAGAAGCATT GGGAACCTCA ATTTCTATCT

53221 TCGGAGCCCT TTCTTTTCTC GTCCCCCCGC CCCGGCATAG CGCTTCGCTT CCGGTTCTTA

53281 GGAAGAATCT ACTGACTTCT TTCTTCTTCA TTGATCTGGG GGAAAAGAAA GCGTCTACCA

53341 GTTGGAAAGC TAGACATCAA GTAAGTGGCT TGATGAGGAT AACTAAGCTG ACACGCCGGA

53401 GTTGGCTGCT GGCACAACTG GTGGTGCCTT ACCGCGCCGC AGGCGGACGC GCGGTAGCGT

53461 TCGTGGTGGT GCTTCAGGAT TCCAATGTAC TGCGTCCAAG ATCAGAACGA GCTTGCCGGC

53521 GGACCACTGC CGTCCCATTC TTGAGTGAGC TGGAGCGCAG CCATCTTATC CACTGAACTA

53581 GCTAGAAGCT ATCGCTTTGG GTCGAAGCAC TAAAAGAAAA GGACCGGGAA ACGCGGCGGC

53641 ATAGGAACCA CGGGACCCCT ACTAGTTAAG GAAAAACAAA ACAGAAGTTT TTCTTTGTAT

53701 AGGTTGGGTT GCTGGATACG GGATCCTTAT AGTAGGCTGG GCCAACATCC AGCCGAGAGA

53761 GGGCAGTCTT TAGAAGCAAC AGGCTGGGAA AGCAAGAGAA GGCTTTCTTT GTGTTTTCTT

53821 CTCTTTTTCC CGCCCTAGGA GTAGCACAAA AAGAGGAACC GGGAAGGGTT ATTGACCCAA

53881 TGATAAACCA CTAGCACCTT CCTCGTTGAG GCTCCGTGCA CTGGGAAAGC GGCCACTAGT

53941 AACAAAGCTC AAATAAGGTA AGGTATCGAG AGGGCTATCA CAGTCAGGTG CGAAGCAATT

54001 ACCCCCCAAA AGTAACCTTA TTCCTATTAT TTATAGGGGG GTGAGGCGAG AAATGACTTG

54061 ATGAAGCGTT CCGTTCGCCA CGCACTGGCC CCATTCACTT GCTTCTCGTA GAAGTTGTAA

54121 GTACACAGTG CCCCACAACT ATGAATAGTA TAGTGAGGTT AAAACACAAG AGTGCCCTTT

54181 AGTCTATCAA CTCAACTCAG AGGAGAAGCT CCAAGTCGTA AGACGAAGGT TCGAAAGACT

54241 GAGGCGATAG ACTCAGAGGC TGATGCGCTG AGCCGGCAGG CGATGGATCG AAGAGCTGAA

54301 TAACGTCGTA AGACTCAGGG GCAAAGAGAA GCGATTTTGC TACTGAGAAA GCGAACGGTC

54361 AGCGCGAAGG TTCAAGACTT AGCCAAGCGT CGGTAGCAAA GCTGACAAGG CAAGGCCTTA

54421 GCAAAGCGCC ATTCTCATAG TCATAGCGGG GCGCTTCGAG TTAGCGAAGC CCTGTAGTAG

54481 GGCCGAAGCC CTATGTGATA AAATACTGAG CCAAGGACGC TCCGCCTTAT CTATAGAAGC

54541 AGTCAACTGA GTTCTGAACA AATTAGCTCC TTGGTAATGG CTTAATCTAT AGATAGAAAG

54601 CCTTATGATG GGAAACTATC ACGTTAGGTT TGGAGAGAGA TGAGACCGGT TATATAATAA

54661 AGAGAGCAGA TGCAAGCTTT TTCTTTCAAT AGCCGGCCAA ATGACTACAG GATCATCGGT

54721 CTACTCTACC TCAATTCACC ATTTCGAACC TTATACAGAA GGTTTTTCCG TACCAGCTCC

54781 TTCTACCTAT ACCGCAGTTG AAGCACCTAA AGGAGAATTT GGTGTCTTTC TGGTCAGTAA

54841 TGGAAGCAAT CGTCCTTACC GTCGTAAAAT AAGAGCACCT GGCTCTGCCC ATTCACAAGG

54901 ACTCGATTCT ATGTCCAAAC ATCACATGCC AGCCGATGTG GTCACCATCA TAGGTACTCA

54961 AGATATTGTG TCTGGAGAGG TGGATAGATA GGACTACTAG TTGCTCGATC AGGACCCTAG

55021 CTTTATTGCG AGCCAAAACC TTGCAGGATT CCCGCACAAC TGAGTATTAC ACAGAAATGA

55081 AAGGATTATG GGAAGAGCTT TAATCCCTGG GTTCTCTTCC AGTTTTGAGT AAGACAGATG

55141 GTGAGATAAA AGGTTTTCTG GAAGCATTGC ACAAGCGAGT TTAAGCTTTT TCAATTTCTA

55201 AATGGATTAG AGGAGGCATT TGGACGGACC TCAAAGAAGT CAAATCTTAA TGATGAAAGT

55261 ATTACCATCT GTTGAGGCTG CTTGTAGTAT GCTACAGCAA GAGGAAGCTC AGAGAGAACT

55321 TCATAAGCCT GTGAAAGTAG AGCAGGATAC ACTTGCTATG TATAGCAAAG GAAATGAGAC

55381 TGTGAGTTGC ACTGCTTGTG GAAAGGCAGG ACATGTCAGA GAGAAGTGTT TGACCATTCA

55441 TTGTAGGCTA TTCATCTGCA CATCCAAAAG GCCAATATGG AAACAGTAAC AGAGGAAATA

55501 GAGGAGGCAG ATGGAATAGG GGAGGAAGAT CTAACAGAGT AGGAAGGAAA TTTGGAGGAA

55561 ATGTGAGCAC CAATTGTGAA ACTGGTAGTA CTTCTGCCCC TAGTGGTTTT ACTGCACAGC

55621 AGCTTAAGCA GTTAATGAAA CTTTTGCCTT CTCCCTCAAA GGTAAATGGA TCAGAAACAG

55681 ATGAAGAAAT GGATTCTAGT TATGCTGGTA TGGTGAGTTG TTTTCAAGCA AATGTGAAAG

55741 AAGGAGTGTG GATAATAGAC TCAGGTGCAT CACATCACAT GACAGGAGAT TTGAATCTGT

55801 TGTGTGAGGT AAAAGAGACA GGAAATCCGC CTCTTATAAG TCTTCCAACT GGTGAGTGAA

55861 ACTGCAAGGA TAGCTCACAA GGGATTGGTG AATCTGAAGA ACAGTATACA ATTGCAAAAT

55921 GTACTACATG TCCCTGCATT CAAACACAAC CTACTCTCAG TTCAGAAATT GGCAGAAGAC

55981 TCAAAATGCA AAGTCAATTT CATGCCTAAG TACTGTATCA TTCAAGACAA CAAAAGTGGT

56041 GAAATCAGAG GAGTAGGTAA AGCATCCAAT GGACTGTATT ACATGGTGAA TGAGTCACTA

56101 AGAGAGCTAA TGAAAAGACT GAACATCAGT GCTGGAAATA TAGCTATGAA TGCTAATCTG

56161 AACCCTAAAG TGCCTGCATG CAGTTGTGAC TAAGAAGAAA AAGCTCAGCA AAACCACTAT

56221 TTGGCACCTG GTCAAACTCC TTACCAAAAA ATGAAGAGAA TAGAGGGACT GGAAGGATTG

56281 AATCATAAGA GTGATGAGGT GTGCCTCACC TGTCCCCTTG CTAAATTCAC CAAGCTGCCA

56341 TACACTCAGA GCCAATCCAG GGCAAGTCAA ATAATGGAAC TCATACACAT TGATGTGTGG

56401 GGACCATACA GAGTGGCAAC AAGGAATAAT CATAGATTCT TTCTCACAAT TGTGGATGAC

56461 CACTCCAGGA CCACATGGGT ACATTTGCTC AAATACAAGT CAGATAGTTT CTCTGCAATC

56521 AAAAGCTTTG TTAAGATGGC AGAAACTCAG TAAGTATGGG AAGAAAGTAA AGAAGATGAG

56581 ATCTGGCAAT GCTCTGGAGT TTGATGATAA ACAGTGCAGA CCATTCTTTG ATGAGTTAGG

56641 AATCATTCAT CAAACCTCAT GTGTTGATAG GCCAGAGCAG AATGGGATAG TTGAGAGAAA

56701 ACACAGAAAT ATCTTGGAAA TACTAAGGAT ACTACTGCGT CCGCTGGTGC TGAAGAAGAA

56761 CCGCGATATG ATGAGCCTGC GCCTTTCATC GCACAGAGAT CTTGACTATG GGCGAGTACC

56821 TGAGATTTCC TTTCAAACTT TCAAAAAAAA AGTTAGAGTT TTTATAAACC CGTAAAAATC

56881 CGTAGAGGAA GCCCCGAGTT CTACCTGATG GAAAATGAAT AGAAGCTGCT ATTGAATTAG

56941 AATTGGAATA AGCTGTGGCA CTTACTTAGA TACCTTAACT CCTTACACTC TTAGCATACC

57001 CCAAAGAGTT CTCGCAAGGG ATATCACTGG TTTTAAGGGA TGGGACATCT TTTCTAGTAG

57061 ACAGAATGGC ATCCGAAGCA ATAGTACCTT TCCCTAAGCA GTGCTTGAAA CAAATTCATT

57121 CACATGTCCC AAGAACCATT GCCCTGTACT CTGCCTCAGG CTGTAGAGGA TCTCTCTCGT

57181 CAGCCCGGAA ATAGGATAAA GATCGAATTG GAGCATGAGG GCCGAGTGGT TCAATCAAGT

57241 TGAAAAGAAA GGGTGACAAG GGCACGAAGT TGCCCGGTGG GTAGGCTAGA AAAGACATCG

57301 AGTCAGTAGC TTCCTTGTAA GAAAGAGGCT TTAGGAAGCT ATTGGGCAGG AGAAGGAAGC

57361 CTAGGTCAGT CTTTCTTTCG CCCTTCTTTA CCTTATTCTA TCTCCTTGAA AGGGGTTTCC

57421 ATCGTTGAGT TTACGTGTCC CGATTACTAT TCCTTCTGTC AAGCTCGGGA AAAAGCAGAA

57481 AGCGATGTAC ATTCCTTTCC TATACGGCGG GCCTAAAAGT CAATCTTTCC CTAGCTCTCA

57541 AAGGGTAGAC GCGGGCACCG TACTCTTTTA TTTGATTGAA TCTTTCTATC TCAACTTCTT

57601 GGGTGCGTGA TCTCGCATTG AGATTAAGGA TAGAGACTTA AGATCCCATT ACCATTACTT

57661 CGTTGAGCCA CTCCCATTCC TATCGCTTGA AGCGGAAGAA AGAACATATA TGGAATATGA

57721 CAGGTATCGG TATTGAACAG ACGGAAGTCG ATACAAGCAG ATCAGCTGGT CAAAAAAATC

57781 CTCTGATGCT CTAGCCAAAG CTTTGAACCA GTTCCTCACG TCAAGGACAG GAAAGATAGA

57841 TTAGATTACT GTCCTATCAG TGCAACCGCC GATTTCTGTC AGTATTGGAG ATGGTAGGAA

57901 TACATCATTC TGGTTTGATA CCTGGCATCC TTTGGGTCCT TTTTGAAGTT TCCTGAGTCT

57961 CTTCTCAAAT GCTTAGGACT CTCTCTTCAA TCTAAGGTTG TGGAGTTTAT CAAGGATGAA

58021 GAAAGGTCTT GGCCTAGAGG AAGGAGACAT ACTACAGTGG TGCAAGAATT TCAGAGAGCT

58081 ACTCCTAATC TTCTATTGCA GCAGTTGCAT AGAGAAGATC ATGTTAGATG GAATGCTTCT

58141 ATTTCAGGAG AGTTTTCTGT TAGATCAGCA ATGAGGAAAC TTTATCATGC TGAGGAGACA

58201 GTAGCATGGT ATAAACTGGT TTGGTGGAAA GGCTATGTGC CTAAGTATGC TTTTGTTTTG

58261 TGGTTAGTGC TGTAGCAGAA ATTGATGACT AGAGACAGAC TTATTAGATG GGGGTTTGCT

58321 AATGTATCCC CTATGTGTGT ACTATACAGT CAGGAGGATG AATGTCTAGA ACACTTTTTT

58381 TTTTAGTGTG TCTATTCACG TTGTGTGTGG GATAAGGTTC AGAGGCTTTG CTTGTTTTTC

58441 AGGGGTGTTA TGCCTTGGAG ACAGGAAGTG CAGTGGTGGT GGGTAGGGAT CGGGACACCA

58501 GTGTAATTCC TCATCTCTAA GTAATTGGTT TTAGTAGGTG ATGAGGTCCT TCTCTAATTG

58561 TTTGAGGAAG TCCGACCATG AGTAAGGGCC CATCGAAAGA AGAAAAGACT GCCTCTTTTC

58621 TGTCTTACAT GGACTCCGGT CTCTCTACCT TCAGCGTGCC AAATCCCAAT CTGCAACAGA

58681 GCGAGTAGCC TGGTCAACGA GTGCGAAGGG AGCTTTGGTT ACGAATAAGG TTTTTCTATC

58741 GTAGGAAGTG TAGTCGCCAA AAGGCGAGTT GAACGAAGGG CCTAGGGAAG TCGGGGCTGA

58801 GCAACCTTTC TCTAGCTTTT TCAGTAGGGG AACTTGCCCC GGCTAGCAGG AGAAGTCTAG

58861 AGATAGGAAG AAGTAGGCAG AAGAGCGGTT GATCCTGTCC CGACCGAAGA CAACGTTTTT

58921 TTGTCTATTT CATCTAATGG GAGGGGCGGC TAGGCGGGTT ACGGCGTAGG CATTCTTCAA

58981 ATCTGTGTGG AAACATACGA ATAAGGATTC AGACTCGCCC TCGTTGGAAA GGTGTATGCC

59041 ACTCCCCAGT GAATTGAGCT TGAGCTGCCG GTGACCGGCT TTCAAAAGCG TTCCCTCTAA

59101 ATCTTCTTTC CTAAACTTCA CTCCTCTCTG CCTTTCGCTT CTACAACTAA GCTCTTACCA

59161 GAAATGAATT CACTACCCGG TACTTGTTCG GTAGGTCGTA AGTAACCCAG TGCCCGCTTT

59221 CTCACTTAAG GAAATGAAAT GAGTCGCAAG ACTAGCAACG GAATAGAAGT CAAATCTGCC

59281 ATGGACCGAA CGGAACTTAA CTCCTTGACT CGATCTTTAA TTCATTTCAT TATGAAACTA

59341 TCTCCTCGTG TTCAACGATA TATAGTTGCC GTAATCATAC TACTTACCTG TCTTGGTATC

59401 TTTTATTTTC TATTGGGATC GTGTAATGTT TTTCAGTCTC TACTTTCGAA GGCGGGGTTC

59461 TCTCTTGGGA GTAGAGCCCT CTCCTTTACC TTATGTAAGT TGGGCTGCTC CGGGGGGCTG

59521 GCCTTGGCCA TTAGGTGGGC GATCAAATTG ATCTTTTTAG ACACCCTACG CCCGAATCCG

59581 TATCATCCCC AAGCCCTTTG ATCATAGTCT CCAATAGGTT CTTCAAGAGA TAGGATGAGG

59641 GAGAGTGGAA CTTCTAACTG AAGCTGCTCA CCTTTTTCAG CGGGGTAGTC TTGAATTTAC

59701 TTAGTCCCAG AGCTCCGGAG TTGAGAGAGC AACTAAGGTA GAGTTATTCA AAGAAAGGGG

59761 CAGGCCCAGA AGAAGAGAAG CGGTCTTACA GCAATTGAAA GAGTCCCCCA AGGGAGGATA

59821 TTAATTTAAG AGGAATGGCC GGGACGGGAC TCCTAGGTGA GAGAGACTAG GGCTACTAGC

59881 CCCTAACTAA GAGAGAAGAT GAAGGAGGTT TTTACCTTAG GTGGTCGGTC CTCCGCCGGG

59941 GAGGTGTTAA CAAACTTATA GAGCCACTTC ATTCATTTTA CTCTATAAAT TAACGCATTA

60001 CCAAACTTGA CTTTGAATAA GAAATCCACA CTTTGACACC TAACCTAAGA TTCCGTAACG

60061 AGTAGATACT TCTGCTTTTT CATTCCGGGG TTCCCATGTA TCTTTGGACA GAAGCTTTTC

60121 ATACGGCTGT TATTGTTATC AATAACCAAC CTACACCACT TCTATATCAC AGATCTTCCT

60181 ATGAAATCCT ACATGGTGCT CCACCCACCA GCTTATTCAT CTCTTCGGGC TTATGGATGT

60241 TTATGCTATG TCCACATCTT GAATTGAAGT CCATTCGTCA TAAATTTGAG CTTAAGGCTG

60301 ATTGCTGCAT TTTTCTCGGG TACAGTGATG ATCATAAAGG CCTCTCTCTG TGCCGTCGTC

60361 GAGTTTTCAT TTATTTCCAT GTCACATTTA ATGAAGCAAC TTTTTATGAT CCGCCATCTA

60421 CAGTGCCTCG ATCTCAGGGG TTGTTGGAGG AGGTGTTTAG GCCCGGTCAA GGCAAATGTA

60481 AAACGAGACT TAGCAGCACG CCTTCATGAG GAGGATCCTA CTCTCGGACG CGGGATCGCT

60541 CATGCTCCGA GCTCAAAGTC GGAGGAACAG AACACGAGGC TTTTTCGACT AATGAAACGA

60601 CCGAGTAGCT AGTTTGGTTG GTATCTATTA TGGGTACCCC CTTGTCGGCT CATACAGCAA

60661 GGTCATCATT CCTATTTAGT TCGCTGCTAA ACGAAGACGG GAAGAGATCA GGCGCCTAAA

60721 TAGCTGAGGG AGGTCAGCTG CGCAGGATCG TGGAGTCGTC TTTTGGTCTC GGAATTTTAT

60781 TCTTACCATA TTGTCTACAC AAGAGCCAAG AGATCAGGGG GGCCTTCGAG GGTCCCAACA

60841 GGTGTCACGA TCAAGCAAGA GCCTGAATTA CCTATTGCCG TCCGCGTATT TTAAGGTGAA

60901 GGGAATGAAG CTTCACAAAT ATAACGGCGC CCCAGTTGGC TTCAGGTCCG AGTTTTTTCG

60961 ATGGGAGGAG CGCAGCGGGG GGCCGGGCCG CAAGATCGAT TCGGTTTGGA CGCTCATCTC

61021 GGACAGCTGG TAAGGCTGAC AGAGGCCATT TCATAGTCAG AAAATTGGGA ACTACGATCA

61081 CGGAGAGAAT TCAAGGGATT CGGCTCTCAG GTCCATCAAC CTTGCAACAT TAACCCCTGG

61141 GGAGAGCGTG TATCGTACTG ATCCAGAGCG GAAGGAGAGC ATATACCGAT CCTACCAGGA

61201 AGGCTGGGGG CGAAGGAGAA CATGGCGGGA GTGATTGTAG TTGGCTGAGG CGCCTGTCGC

61261 CAGCCGATAA GCGACACAAT CTAACGTCGT CAGGGGAATT TTGGCGGGAC ACAGGCTACG

61321 AAACCATGCT TCGGAAACAT AGTGACTCTT CGCCCTGCGT AGCTTGTACT GTTCATAGAG

61381 TGCAGCTTGT TTTTGAGAGG AAAATAGGAA ATTGGTCTTC CCTTGAGTCT TCCATTCATG

61441 CCTTCATGGA TGGCTACCTA TGAGGTATGG CTTGAAAGCG CTTTTCTACT ATAGGAAAAT

61501 TACAATACAA TAGAGATTTC TGGACAAACT AGCGAGGAGT GGACTCCCAG GAAGAGAAAT

61561 AACAAAGAGC AACAGACTTC GCTTCGGTCC CTACTGCTTG AAGTTCAATC CCCTCAACAA

61621 CAGGAAGTTG AACCTCCCGC GGGTATAGGA TTAGGATTAG ATCGTACACC CGCAAACAAG

61681 ACTGCCATGG GCGGCTACCT GCTTGACTTT CTTTATCGAG AAAGCACCGC ATCAAAAGGG

61741 CGGGATCGAG TGATTCCCTA CCTTATTGAT ATTATTTCAA TTCATTTTTG AAGTTTGAAG

61801 GTCGACATAT TATCAAGCTG AGAGAAGCTG AAATTAAGAA GGCTTAGGGA AGCTCTTATT

61861 ACTATGGCTT AGCCTAAGAC ACAGCAATCG AGTGCGCTGA TTGCTCCGGT TGTGCCTGTG

61921 TCTGCATCGA TTCGTCAGGA CCTTCGAATG TTTCGATTGC ACCAGAAGGA GTGGGCTCTA

61981 CGGGGATTAA TGGAACAGTG CAAGGAGCAG CGATTCTTTC TTTCTGCCGC TGCGTCAAAT

62041 GTAGGCCGTG GTGGGCAAGG GCGCAGCGTG GTTTCGCGTC GTCTGGACAT GGCTACGCCG

62101 CCTATACCTG AGGAGTCTGC TAACTAAAGG CTAAAGGTAT GCGTCTTTCC TATATTGCTC

62161 CTACACTTAA GCAAGGTAAA AAAACTGCTT GTCTGCTTAA GAATGAGGTT GAATCTGAAG

62221 CTAAGAAATG GGCTAAGGCT ATTTTCCTAT ATGTGATTGG CGATACTCCA TCTATTCATT

62281 TCGTTTCAAC TTTCATTGAA AAGCAATAGC CCTTACACCT GAACTATTTG GACATAGTGA

62341 GGGTTCTTTT GTGGTTCGAT TTAAGACTAT GGAGGAGAGG AACGAAGTCT TGTATTCTGG

62401 ACCTTATACA GTTGCTAATC GTCCTGCCAT AGTCAAGCCT TGGCAGCCTA ATTTCCATTT

62461 TCATGAGGAA GTTCTCAAGG TGGTACCGTT GTGGATTTAA TTGCCAAATC TACCACTCAA

62521 TTGCTGGGGT TGAGTCGCAT TGGTAGTACT CTGGGGAAAC CTCTATGTGC TTCTGACTGT

62581 ACCGCAACTC AATCTAGAAT CTCTAATGCG GGGGTGATGG TTGAGGTTGA TGTTACTAGA

62641 CCTTTGGTGA AGGAAGTTCT GGTTGAGGAC CCGTTAGGGT CTGGCATTTG AGCAATCTAT

62701 TACTTACGAA TGGGTTCCTG ATTTCTGTTC TAAGTGTCAG AAGGCTGGAC ATGACTGTGC

62761 GAAGGCTGAT GTGCATGATA AGAGGAAAGG TTGAATTTCA TCTTGTATTC TGAAGGGGGC

62821 TTTCCTTTGT TTGTTAACCC TCTTCCCGAC GAGGTCTCCT TCTTCTTACA CTGTTTTCAT

62881 AAAAGACGGT TGCGTAGCTT ACTTGGTAAG GGCTTTTGAA GTGTTTCATA ATGCTTATGG

62941 GCACGGGGTA TTTTCTAACG GTTTCATTTC ATCCCTTTAA AAATCAGGTG GGGACATTCA

63001 CATTAGAGGG TAAACCCTAG ACCCACTTTC TACACCTTTG CATAAGCCTT TCCCGGGAAG

63061 CTAAATTCTA GCTTTTTGCC TATAGATACT TTCTTGAAGC TCTATCGACC CTTTATTAAG

63121 GCTTCATTCC TTCCTATTAA CCTTGATTTA GGGGGCGGCT TTTTAGGGGC TGCCTCTTTT

63181 CCCTAGGGCC TATTCCATTC TCCCTTATGT CTCGGTTTCA TTTACAAATT AGTTCGAAAG

63241 AGCTTTAGCT TCACTGATAA TGACTTCTGT GTACCACTAC AATCCCTTGC TTGTTCTTTC

63301 GCTTTAGAGT TTAAGGAGAA ACACGCTCTC TTAATATATA CAGGCTAGAA AAAACGATTC

63361 TTGAACTCAT ATATCTTTCC CTATAGCCAG TAGAGGGTCT TTCTTAGCTA GGAACTAGTA

63421 CTTGTTTTTA TTAAGCGGAT GATCCGGACC CAGCTCCTTT CTTCTTTTTA TGCCCTATCT

63481 GCCCATCTTC TTTAAGGTCA TTTATAGATT CATATGAATA GCCCTTGGAG AAGCCGAGCT

63541 ACCTGGTATA CCCCTTTAAA CCTAGAAAGC ATTTTTTCTG GATTTCTTTG TCACTTAAGA

63601 GAAGATGTCT CCCTTCTTCT GCTTGTTGCT CATCCCTTTA TTGACTGACT TTTCTTATCT

63661 GTCTTTCCTT TCTCTGGGCT GGATCGATAT CTTGGTCGAT GGGCCCATTC TCAAATGTCT

63721 TTCCCTTTTT ACCGCTAGGA GTTAAGCTAA GTCATATGGT AAGGAGAAGA GAAGGAGAAG

63781 TCTTCGCAGC TTGAGCATGT TTTTGTCCTT GGTGGTGTGG TATATGGGTG ATGTTCTTAA

63841 AAAACCCTTG GTCCTGAAGT TGTATAATAC CGAAAGAAGG TAAGTAAATG CGATTAGTGG

63901 TACATTTGTT GGAAAGCCTA GCTACTTGAT TTATAAGCCA CTCCAGAGCG GTAGAACCAA

63961 CCCCTTGCGT ATCATTCAAG GCCAGAACCT TTCTCCTATA ATTCTTTATT TTTAGGCATC

64021 TATAACGGGT TTGGCAAATA GACATTCCTA ACCGAGCACA GAATGTTCTC CAGTTACTTC

64081 TGGGTGCCTA GGTATCCACC GTAAGCCTTT CCTCGATTGA TTGAAAGCGT AAGACAGAAA

64141 CCTTGAGGTC AAAAAAACTA GCTATTCTAC CCATAAGGGT ATATTTAGAT TAGCTGCCTT

64201 GCCTAAAAGA AATGAATTAA CCCTTGCATT AATATGTGAA TGCTCCCTTT CCTAATAAGT

64261 TTTCTGACAA CCTTCTAATT GTACTGGTTT TAATCGCTGG TTTATATCCA CCGGTTTTAA

64321 CCGAATTCAT CCAGGGCGAT ACTTGCTCGA GCAAGAGAGG AAAGGTTTTA TTACCATATG

64381 TCATCGATAG GGACAAGGGC TACTCTTCAA TTCTTTAAAT GCCTTTAGCT ATGCCTTGAG

64441 GAAGATTGAG ATATCCTTTA AAGGGGGGCT TACTTGAGAC GGTTTAAAGA GCATTTATTG

64501 AATGGGAAAT GAGGTGGCTC AGAAGAGACC GGGATATGAG GAGAAAGCAG CCGGCTCTTA

64561 GCTTCGTAGA TTATGGTATA TATGATATAC TTTTTGCTTA AGCTAGGTTT TACATGAATT

64621 GGAGGTTAGC TAGCTTCAAA GCACGGATTT CTCATATCTC GATTCTGTTG CTTCATAATA

64681 GGAAGGCATA AACCCTTGCA TCATTGAATG ATCCCTTTCA AAGTATATGT CTCTGCTCAT

64741 GCTTCATATT GAGATTCGCT AGCTTAATAG GTTATACAAT TTATTCATTC TGCCTGGCAA

64801 TTAATAGTCT ATTAGCAGCC TTAAAGTGAA TCTGATTCTC GGTAAAGGAA ATATCTTAAG

64861 AGAAGAAAGC TGAGTCTAGG TTGAATTTCA TCTTGTATTC TAAGCTTGAG CAACAAGGCG

64921 ACGGAGCCAA TGAGCACCTC AGTAGCGCTC CGAAACGGGG CCGAGGAGCC GGTAAACCAG

64981 TGCGTTTGAG TGAAGGTTGC GGATATGAGA TGGATGAAAC CGAGCTAGAA ACAAGTACGG

65041 GGATTACAAG GGAAACCATT CCCTAACCAA GAGGAAGATC AAAACCCTGC AAGAAAGCTT

65101 GAACAAGCGA TAATTCCGAT ATCACATCCA TTCCTTGTTC TCTTTTTCTT GCTAATTCGC

65161 TTGAAAGGAA CAGCTAATCT ACAATTAAAG GCAAGGCAGA ATTCATTGAT TTTATGCATG

65221 GTAGCTAATC TCAATCTGTA TTCTTATATT CCTATTCTAG CCTCGGGATT GATTTGTCCG

65281 TTTCATATAT ATGGAAAAGT AAGAAAATAG TCATCTTATT GTCAGATTTC GTCTGTGATT

65341 TCAGTAATTG ACGGAACTAT TAGATTGACA TTGACAATGC TAACATTTGC CCATTTCTTC

65401 CTTCTCTATG AACATCTTAA TTGATTCAAA ATATGAAATT TCCTGCTCTT CTGTACTTCA

65461 CTTCTGGTAA GTCTCATCAG TCTTCTGGAA ATATCAGGCA TATAATAGAT TCTTTGACCG

65521 GCTTTGGTCG AGCAACCGTT ACATTTCTTG AATGGCCACA GCCTACATAA CGCGTCTCCC

65581 TCTTTTCAAG GAAGTGAGTC TCAGACCGTA TGTAGTTCTC GGTCCTTTTT TTACAGTTCC

65641 TGACAGGTGC TTTTGTGGCT CTTCACTCCA GCCCTGAAGT ATTCTGTGAG CCCAATCTGT

65701 TTAACGTGGG CCCTCCGTTA TGAGAGTTCA GTAAGGAAAG AATCGAAATA CGAATGAAAT

65761 CAAAAAGGCC ATCATTAGTA AGAATAAAGT CAAGAGGGCG TGTCCCCTGC GGGTCTCGCA

65821 GAATTCTGCT GCTGCAGCAG TTCAGGGCGC ACCATAATCA CAGGTTCCAA TTCCACTCCT

65881 CTCAGCCAGC TGTAGGAGAA TTTATGTAAG ATAATAATAG GGGAGGCGCT ATGTTTCTGC

65941 CGATCATTCT CTTCATAAAC CCTCTGCATA AAGTTGGGAT AAAATACAAA GAGGAAATGA

66001 AGTAAACTTA CGGCATGAGA ACAAAGATAG AACAAAGACC CAATCAGAAA CGGTAGGCCC

66061 AAGAGAATCG CGGGCATATA GTCCCAAAAG GGAAGCTGGC TTAGCGCCTC CCACGTCCAC

66121 AATTTCATGC ACGCAATGAC AAGTCCTCCC ACTGAAGCAA TTGTAGCAGC TCCGGCACCT

66181 ATTGATTTTG CTCCTTCTAA CATAACAGTT TCTTATTCTT ATTCCCCGTA CCCCCTTTTT

66241 CATTGTGCCT CGGTGGGCAG GTTTCTCAGT TTGGATTGTT TATAGTACAA GCTTTCTGTT

66301 CGGTTGGTCT TTATATCCTC TAAAAGAACA TTTCATTTTT CTGGTCCATG TTCTTCCGTT

66361 AGAATTTCTA TTGCAAATTG GACTTTATAA GCGCCCCATT TTTGCATGCG TTCTTCTTTT

66421 CGTAGCTCGA GGATTAACTC AGCTAATTGA TCTTCTTTTT CTGTGAGCCA TCTTGCCGCA

66481 TCTTGCGGTC TTTCGTTAAA CATAGTTCTT ATCGCCTCTT CCTCTTCGGC CAGTCGGAAT

66541 ATCTCATCTT GTGAGATTTC ATTAGGCCCA GGCCCAGAAC TCGAAGCATC CATCATATTG

66601 CTCGGAAAAA AAAGACTTAA GCCACTAAAG AGTGAGAATA ATTCCGCGAA GACCATAATC

66661 AAGCTTGATG AAAAGGATAC TCGTAGAAAA TACATATAAA GCGCACCTAG AAAGAAAATC

66721 AGATAGTAAA TGAGAAAAAC GACTCTTTTC CCAAATAGAA GAGATAAGCG AAAAGAGTAG

66781 AGACGATACA AGAGAACAAC ACAAAAAAGG ACTATTCCCA TAAAAAGATA ATTTTGACCA

66841 CTGATTACAA TAGAACTGCC TTGCCCGACA AAACCATATA AAATAATAAC GGTGAGACTA

66901 CTGATTAAAC ACCCCAGGAA AAAATGCATT TTTCTTTCCA TGATTCCAAA ATCTTCTTTT

66961 GTTGAGGGAG AATGCCGCTG CCGATTGCCT TTTTAGGCTC CAAAGCAAGA TTGGATCCAT

67021 AAGGCTCCTC TTAGCGAGGC GAGAATGATG AGTGGGGCAG GTTGTGACGA ACAATCGAGC

67081 CTTTTTTATT TTACTACTAT CGAACATAAG ATCTAGGAGA AAGGCGCAGG AGCTAAGATC

67141 AGAAGCCTTC CGTCCATTCC TAGCCATTAG CTTTTTGATC TTTCTCCTGA CTTGCGCATC

67201 TCCTCTGCTT GTTAGATCTT TTTTTTCTTA CGAGATTTTT GACTACTTAT TCTACCTTTA

67261 CGTACCTTAA CCTGGATCGG AGGAAACTTT TCGTTGACGA TCTTAAATGT CGTAAGATTC

67321 TACTTTTTTT CTCAATTTCA TTTCATATAA CACTTGCGAC TCGAACAAGA AAGAAGAAGG

67381 AAGGTTGGGT CGTATAGAGG CAGCTTAATT TAATAGACTA GAGCTATCTA GTATTAAAAT

67441 ATTGATTCAA ACCGGCATTC AAACCAAGCC TTTGCAGCTA AAGCATAAGC TCTATCCTTT

67501 TTCCCAATCG ATGACATCAG GCTCGAAGAC CTTCTGCCCT CTTCCCCTCG CAGTTTGAAG

67561 CCGGTGACCT ATTCCCATTA AAAGAAAATT CCTCTTATTT ATCAGGGTAC TACTTCGAAA

67621 CCGAGACTCA GCTTGATTCT CTGTATGATA TTTCCTTTCC TCGGGAAAGA CTTTCAAAAC

67681 CATACACTTG TTTCAGACCT CTCCCTCTCT TCCGCCCTCA GTTTCACTCC GGGTCGTCCG

67741 AAGAAGGACA ATAGCAAACC AAAACCAGAC GACTAACTTG ACCAACGCAG CAGAAGGATA

67801 TATGAAAACA AAGAAATTCA AACACAGCTT ATTCCTACTG CAAAGGGTAA TCCGGCTCAA

67861 CCATCCCCTC CATCTCTCAA TCCACCGCAG CCGCAACCAA TGATGTCTTT CAGAGATCTT

67921 GTTTCTGGTA ACCATGGCAA TAACACGGAT ATGGATTTCA ACAATGAGGA GGATGAAGTA

67981 TCCGATGATG ATGAACCACC ACCAGATATC ATGGAGGATG AGAAATGCCC TGTAATCCTC

68041 TTATCTAAGG AGGAGAAAAG AAGATTGAGA CAACCCTGGA AGTATTCGCT CATCATCAAG

68101 TTGTTTGATG GAAAGGTGGG TTACATGTCT CTGATGAAGA GGTTGAAGGC CAAATGGCAA

68161 CTCAAGGGGG TCCTTAACTG ATGTCGGTAA TAATGACTTT ATTGCCCGTC TTTCGTCCAT

68221 GGATGACTAC AATCACGTCC TTACACAAGG GCCATGGTTG CTTGGTGACA ACTATTTGAC

68281 AATAAGGAAG TGGGTACCTA ACTTCATTCC TGACAATGAC TCGATCAAAT TCCTCACAGC

68341 ATGGGTACGC ATCCCCAATC TCTCAGTTGA GTACTTTGAT GAAACCTTTC TGAAGAAGGT

68401 TGGAAGCAAA ATAGGCAAGG TTCTAAGGGT GGACAAAACC ACGGCAAAGG CTGAAAGAGG

68461 TCAATTCACC CGCTTAAGTG TGGAAATTGA TCTAACGAAG CCACTCTTGT CCAAATTCTG

68521 GTTGAATGGT CAAATTTGGA AGATTCAATA TGAGGGGCTC AAAATGATTT GTTTCAAATG

68581 TGGAAGGGCA GGGCATAAGG GGATGGCATG CGAGGTGGAG AAGAACTTGG AAAAAACCAG

68641 GATGATGGTG ATGCTGATTC TAGAAACCAA ATCGAAGACA ATGATTATGG TTCTTGGATG

68701 CTTGTTAAAA AGCCAATGCA AAGGAGGAAG TCCACCAAAC AGCAGGTGCA ACAACCACCA

68761 AATCCGACCA CCGCAAATAA TAACAAATCA ACCACCATAT CAGTCCAAGG GCAATCGGGT

68821 GGCGCGGCAA AGGGTGGTGG TTCCAGATTT CCAATTTTGG AAAACGGCTT TGAAGAGGAA

68881 AGGGCGCAAT TTCAGGGAAC CAAATCCTCG GAGGATCAAT TCATTCTTGA AAATTCGGAA

68941 ATTAATAAAG AAGTTTCCTA CAATGTGGCA ACCGTTGACT TGGATGCTGA TTCTCAGTCT

69001 TGGTCACAGG AAAATCCTAA TAAATCCTTT CATTTAGGAA AATTTTCTCC AAAGAAAAGA

69061 AAGAAATGGT ACCCTTTAGG GGAAAGAAAA GAGGTAACCT TGTTCCCAGC CTTTAGGAAA

69121 GGAGTTGGCT CACATCTTTT GTTAACCTTA TTCAAATGGG CTACACTTCA ATTCTTTAGC

69181 GAGGGTAAGA GGAAGATTGA GATATCCTCC TTTAAAGGGT ACTTGAGAGG GGCAACAGAT

69241 CCTTTATTTC AAGGAAATAA TAGCAAGTAT GGGAAATGAG CAAGAGGAGT GTTCTTATTT

69301 CTAAAGTATG GGGTATGTAT ACTGAATTGA AATCCTCTAC CCTAGCACGC TATACCCGAC

69361 CTAAGGCCGC TGATGACGAC ATTAGACTAG ATTGATTTAA CCGATACCAT CGAAGGGTGG

69421 TGTAAGGTTC CGTCTTTAAC TAGTAAGGCT GAAGGATTTC ATTCCGGATT GTCCGCAAGG

69481 ATCATATTGA AGGAAAGGAA TATCAATCTC TATCACTGGT TTTACTTAAT TGGTTAAATA

69541 CCGTAATCAT CGATAGCTAC ACTTGCTCTA GCAGCCCAGT CTTTGTTAAA CCATATTGAT

69601 TCGATAGCGG GTTTGATTAG CTTGGGTACA AGTTTTCTTG AAAGAGTGAT ATCAATCAAC

69661 AGCTTTTGCT GCACCTGTCC TATCGATCGT GCCTCTTTCG AGGACTTCGC TGGGAATAAA

69721 TGCATTAGCC GGTGTAAGCT CCATCTTGGG TGCAAGGGAA CCCCCACCTA CACTAGATAA

69781 AGAGGAAGCT GTACTTTCAA TAAGGCAAAG GGTTTTTCAA GACAATTAGC ATGAAAGTGA

69841 TCATAAAGTT TGAGCTGACT TGTTTATAGA TAGGAATCAG GGTGCCAAAA CCCCGTATTT

69901 TTCGTCATTT TTCGACTCAA AATAGGATAG AAAGACAAAC CACATACCTA TGATTTTTAG

69961 AAATGAATAA AGAGTGAAAC ACCTTATTTT AGGCAATTCC GGTCCTTATT TTAGGATGAA

70021 AGAGCTTTTT CCCTCTAAGC AGCTGGATCC CAAATCGGAA TAGTTGCATC CCGTATAGTG

70081 GCAAATGTTA TAAAGATGCT CGGCTCACTA GTTCTCTAAC CTTTGAATTC TTGATTGCAA

70141 AGACAGTCTT TATGAAAAAC CGTGATTGGT GAGGGTGGCG GACAGGGACC CAACATAGGC

70201 ATTTTGTCTC GGTTTCATTT GAATCAAGAT TCTCGGGAAA AGGAAGAGTT TTCTTCTTAT

70261 CCGTGGTAGA GCCAAAGGAG AGGTTCTAAT GCTAGATTAG CCGATAGGGA AAAAGGGTTT

70321 AGCAACACTG GTTTATTGAA AATAGATTCC TCCATAGCGC CACTTGCTTT AGCAACAAAG

70381 GAAAGATCAC TCCGCCTTAT CCTTTCGATA GACGAACCAA CAAGCGAGGG ATGATAAAGA

70441 AAGACTGATT GAACCTATTC CACTCTTCCA GCTAGAGACA GCTTAAGACC ATTCCAAGAA

70501 TTGAGTTTGG CTGCCATTTT CTCAATAAGA GGAGCACAAG AAACCATCTT TCAACCATGA

70561 CAGCACAGTG GTAGACCAAG ATAAGGAACT GGAAGGCTAC CAACTTTGCA ATCAAAAATA

70621 GAAGCTATGG TTCCCTTTCT TCTCACTGAT GAAGTCCTAC CCCACCCACA GAATTTAAAG

70681 AACCTAGGGG AGCATGAGTC ATATATTCTG CTGAACGTCG TTCTTGCCAA GGCTGGATGT

70741 CTTTTTTCAG CCGACTCAAG TCCAAACCAT TTGGACCCCT TAGGGGTTCT AACCAAGGAG

70801 CGCGCAAATC CCAAAAACGC ATAGTTTCTC CCCCAAAAAT AACTTCTCCA GTCGGAGAAC

70861 GCATTAGATA CTTACCTAAA CCAGTAGGTC CTTGAGCGGA TCCTACGTTA GCTCCAAGAC

70921 GTTGGTCTCT AACTAAAAAA GTAAATGCTT GAGCTTGAGA AGCTTCGGGT CCAGTGGGCC

70981 CGTAAAACTC ACTAGGATAG GCAGTATTAT TAAACCAAAC AAAGCAACAA GCAATGAAAC

71041 CAAAGACAGA TAAAGCACCC AAACTATAAG ACAAATAAGC CTCTCGTCTT CTTCTCCCTT

71101 TCATTCCTCC TTGCTTCTTG GGGAAGAGGG AAAAGGCAAC GGTTAGAAGA GGGAAGCAGT

71161 ACCCAACCAA CTTATCTAGA GTGTCTAACA GACGTAGAGT GCCGAGAGAA CCTACCGAGT

71221 TTACGACATG GGGTAGGCGA CCTACCTGGT AGTTACTGGG GAGAATACGG CTTACTGTCC

71281 AGCAATGGAG TGAGGTCCCT GCTAAGGGTA TATCCCGAGG ATCACCTTTA ACACATCTCA

71341 TCTTCTGCTG ACCCAAGGAG AAATTGCCAG GGCCCTTGGT GAAGTCGACC GACCGAAGCT

71401 ACACTCCCAA CCTCCTATAC AAAACTATCT ACCCTTTATC AAAGAGAAAC AAGGTAGATT

71461 AGACTATTAC TGGTGGGCGA AGGTATGTTC GTATGGTTAG TCAAGGAAGT CAGTTAGCAG

71521 TTATAAGAGA CATAGAATAA ACCAGATTAG ATTAGACAAA AGGTATCCTA GCTAGGACTT

71581 ACCGGCCGGA CACTGTCTTT TATTAATACT GGTAGTTGAC GCTCACGGGT GTGTAGCGAA

71641 GTGGGCTGGA ACAGCATGTT CTCGCCTAGG CTTAACTTAC GACGAAGGAC AGACAGTAGG

71701 ATTTGAACCT AGCGTCTCCC TCGAACGAAG TGGTCTATCA ACGTTACTTG GATCTTAGCT

71761 TCACCTTAGC ATATACTATA CTAAGCTCTT CGAACCTTCG AAGAGAAGTC CTTTTATGCG

71821 ACCTTATGTT TAAATAGGTG CTTCTGAATC AACGCTCTCA TGCTTGTCTC GATCGACGAT

71881 TCTCAGATGT ATAAGTACTC CTTTCCTTGT AGTGAACGGG CAGGTCAATA GCCATGCCCC

71941 ACGCTACCAA TAAGCGCTCC TGATCACTAG TAAGGCTCAC CAAGAACCGT GTATCCCCCG

72001 TGGTGGTATT TCAGCGGTCA CTTACGACAT TCAGGAAAGA GTTAACTTAT GCAATTTCCG

72061 ATCATTCTTA ACCTATAATT TAGGAGAATT CTTAACCTTA AGTATGAGTA GCTATTTCTT

72121 TTCTTTATAC GGACTCACTC TTAGGAGTAT GTATTCCGTA GGACTGACTA CTATGTCCTT

72181 CCTTCTTGCC TTATCGCCTT AGTAGGACCA AAGCCTCCCC TTTGACTACT TGCTTCGTCG

72241 CTCCGTTAGT CGATCTAAGC CGGATTCCCC CTTTCCTACT GTAGAAGCGT AGGGGACAAA

72301 TCTACTATCG AATTCCTTCA GTCTTTCAAT ACGACGGAGA TGTCAATCAA ACTTTTTTCC

72361 TTAATAAGAC CCCGCTCCGG CGGACTTTCA TTAACAGACA GGCAGAAGAG GACTCTGGGA

72421 GGAAGGTGTA ACGGTAGGTG CCTTACTTTG GGGTTTAAAT TAAATAGGTG TACTAGAGAG

72481 ATCGTTGAAG CTAAGGGCCA GGCTAAGCAA GCAGGATCCG GGCTCATTCT CGGGACTTCG

72541 TTTAGCTCTC CCCCTTTTTG TTTTGCCTTA GTACTAGGCG CGGGTGAACG AGCGAGAGTC

72601 TGTGAGCGCT CCTGCGTGTA AGCATGGACG ATCAGTCATC TAGGACTGAT TGCGAAGAAG

72661 CAGCCTACCG TAAATGATCG ATTCTCCTTC CTATTCGCTT ATTTGACTCG TCTTAGGAGA

72721 GGATTGCGAA CGCCTTTGCT CAGCGCTTGT CTTTCCGCAC CAAAACGGAA GATCTATCTA

72781 TCTTGCTCGG GATGCTTACG TGCTTCCGCA CCAGACTTTC TTGCTTTTCC GATAGCCTTT

72841 AGTATAGGAG CATCTCTAGT GGTCCCGCCT AACTCTTCGT TATCTGTCCG AATACCTCTG

72901 ACTATCTGCC TCTGTTTCAC GAATAAGTTA AGGGACTAGG AGTACCTGCC GGAATGAGCT

72961 TCCCTCGTTG ATTCTTTATA CTTAAGTATA GCCTTCAGAC AGAATGAACG GATCGAAGAC

73021 CGATTCTGAT CTCAAAATGA ACCTATCCCT TCCGCCACAT ATACTATATG TCGCTCTTCA

73081 AACCTTTCTT TTCTACGCTA CGATCTTTCT TCTCTTATGG GTTTTTACTT ACTTTCTTCT

73141 TAGGAAAGAA GGAAGAAGGC CATTGATCTT ATAATACGTT ACCGGTGTAC TTACTTCAAC

73201 ACAAGAAGCG TGGGCCTCTT CGATAGAAGC ACTTTCCTTT GTCTTGGTCC CAATTCAACT

73261 ACATCCGCTA TAGCATTTCA AATAAGTGGT TATTGAGTTC TTAGCTATTG CATTTCTTTT

73321 TCTTATTGCT GGTCATATGT ATAGAACGAA CTTTGGTCCC AAACTCCTTA GGGTTTCATT

73381 GTTTTTGGAT ATAAGGGAAA CGTAAAAGTT CCGAATGCAA AAGATAGAAA CAGAGTTGAT

73441 AACCTCACGG AGGGGTTGAA AAACGTCAAG GGTGGTAAAA ACAGGTATTT TTGCGATGTT

73501 GATTATGCGA CAAAATGGAC AAAAAGATGT GTCGATAGGC TCCTTTTTCA TAATGTCATA

73561 AGATATGTGT TTTTCTAAAG TACCTCTTTT GCATCGAAAT ATACGGGGTT TCGGCAACTT

73621 TTTCCGTCCA TCGGCTCCAG AAAAAGGAGA AACATATTCT ATTTGTCCCA GATTGGGTGA

73681 GAAGGATTTT ACTAGGGCCT TTAGGCTCAA GTCGCGTAGA GACACGTAGG TTCGAAGACT

73741 TAGACGTTAG TCTAAGTGGC GAAAGAGCTT CATATCGTCG TCTTACGACT CAGTGGCTTT

73801 AGAGCTGAAT AACGCCCATT AGGGAGGGCT CAGTGTTGAT AGACTCAAAT AGCGCAGAGG

73861 AGATGCGCAG GGCCGAAGGC TCAAGTCTCG TAGAGACGCA GGCTCTTTAG AGTCAAGCCC

73921 GATAGGGCGC AGGGGCGAAC TCAGCTCCAA GTATAGTATA TACGAAGGGG TATATATAAT

73981 AGTAAACCTA GGCTTTCAGC AGACACATCT ACATCCGAAT CCGAAGAAGT GGGGAATCCG

74041 CGACTGGAGA AGAAGGCCTT GTCCCCTGTG GGTGGTGGCC AGGCGAAAGG ACCGACCCGG

74101 GAATGTCTAG GAGAAAGCAC TTCCTAACAG AGCAGTCTAA TTTTTGTATT CGGCGGTAGG

74161 ACTGTGATAA CAACCTTCTC TTCGACCGTA CCTTCTTTCT TTAGTAGCGA GTATAACTTT

74221 ACAGATATCA TAGATTTTCA CCATGACCAG CCCTGACTTG ACTGGTGGGA GAGAAAGTCT

74281 CAGCGCTAAC TCACTAGACG GACAATCGAC CCTAGGGAGA GACCCGATTC AGCCTGGGAA

74341 CATCACTTCC TATAGTGGAA GGTAATTATG GGTTCTGCCG CACCTTATTC CCGAGAAACG

74401 AGAAACCATC ACATCAATGA AGGAATGCAA GTGTTTTTTT AACCAGATCT AATATTTCGA

74461 CCTTGATCTA TTTGAAACGA ACTGCCCTAC GTTCAATAAA AAGAAAGACT GTCTGGCTGT

74521 AGCCATGCCG AATGGAGAAG GAGGGGCAAG GGCAGACCGC TGCTGGTAGC CGTAATTGGG

74581 TGGCGCGCTA TAGCTATAGA TCGGATCTTA AGTAGCTATA GGATGAACCC TGGAAGACGG

74641 CCCGGCCCCA CCGGAGGAAG CGGGTAGGGT GAATCTCCGT AACGATTCTA ACGACCTAGC

74701 TAACCGTTGA TTCAATGTCC TCTTAATCGG GGCATAAATT CTTTTGTATT CAACGCCCAC

74761 TTTTTTTTCA GGTCTGTTGG GGAATCATCA AACATGATGT GTGCAAAGCT GTATCGAACT

74821 TCTTTCGAAG TGGAAAGCTG TTAAAACAGG TCAACTCCCC GCTGATCCCT AAGGTGGATA

74881 ACCCGGAGCT CTTTGAGGAG TTCAGACCTA TTTCATTGTG CAACGTGCTC GTAAAGAAAA

74941 TCTCGAAAAG TTTGGCGAAT CGGCTTAGGG AAGTGCTTGA TGAGTTGGTG GGTCCCCATC

75001 AGTCGGCTTT CATTAAAGGC AGGAACATCA GTGAAAACAT TTTTCTGGCT CACGAGCTGG

75061 TCCGTAACTT TCATAGAGAC AAAGGAACTC AAAAGTTTTG CGCAAGGATA TGCAATTGAC

75121 TTTCTTAGTG CTTGCAAAGC ATTAAGGAAA GAAATCTACC CCTTATTGTG TTAGCCTTCC

75181 CAGATAATGG AGAAGAAGCT TAAAATGGCT TAGGCTTTAT TTATCACATG CTTTCAAACA

75241 GGCGAAAAAA CTTATTGCTA GATGGATTAG AACTACTATT ACATATTACA GGGGAATAAA

75301 GAACGAAATC TTATCTATAG CCCAGCCCTT CCGACAAGAA CAGTTACGCC TTTTCCGTCA

75361 GCCTTTACTA ACTAACTAAA ACACCAGGAC TTAGCCTAGC TACCACGGAA AGCATAGTAA

75421 GAAGGGCTGA AAGGCCATGT CATATTCCTC GGGAATTTGC CTTAACTTAA TAAAGGTTTG

75481 AAGAGCGCCA TTAACTGCAA TAACTGCATT AGCTACAACA TAAGGAACGA GCTAGGACTA

75541 ATAAAGTACT AGAAGGAGAA AGCGTTAGCT GCAGGTTTTA TTAAACTGGA TTTAGCAACA

75601 GCTAAGATTG GATTCTTATT TGGATAATCA GAACAAGGAA AATAAATTCT CTGCCCCTGG

75661 GAAGGTAGGT TGTTGGGACG AAGAAGAACA GGTTTCACGA ATGAATGCCC TGTTGGAAGT

75721 TAGGGGAACC CCTTGTTAGG ACAAATAAGC TGCTTCCCTT GGTTTGCTAG AATAGACTCT

75781 TAGATGGGCA GAATGCCCCA TTTCAGTCTA TTGGGGCTTA GAAACAATAC AATCTTGACT

75841 TTCTTTCCTA AGCTTGAATG TGGCGAAAAG CAAGGCGGGC AAAGCGATTG ATTTAGTTGA

75901 GACCGATAGA TAGAGTACAG AGTACGGGGC AGGACCAATA TTAAGAGAGG GGACGTAGGA

75961 CATATTTATT TACAGGAATC GCTAGACAGA ACTAAGACAA AACAAAAACT GTTTGATGGA

76021 TTAAAACCTA AAGGTTCCAA ACCTCTTGTG TGATATCACA TGGAGGAAGA CAGCTGTGGC

76081 GCCCACCTGC GCTGGTCTGC GTCTGACTCC TGTTCCCTAA CTGACATTCC ATTCTCTGGA

76141 CTTTTTTTCC TCTGGTGCCA TTGATTTTTC CGTACCGTAA TAGACGAGGG TGGTCGTAGA

76201 TCAGCTGAGA AACTCATTTG GAAACTTACC CCTTCAGGAA GATTCACCAC AAAATCTGCA

76261 TATGCACTAG CCACAACCAT TGAAGATGAA CCAAACCTTT CATTTCCAAA CTGTCAAGAC

76321 CTTCGCTGGC CAACCCCACT CTCAACAAAC TCAAATACTT CCTAAGGCTC TGTGCCCATA

76381 ATCGTCTTCC AACCAGGAGT CATCCGCACC ACATACACAT TATAGCTGAA AACTTCTGCC

76441 CTCTTTCTTT GTCCTTTCGA AACGAAAAAT GTTCTCCATG TGCTTCGAGA CTGCACAAAA

76501 GCTAAAACTA TATGGAGGTT GGAACATTTC ACTTTCACCC AAAACCCCCC GGAGGATATC

76561 CTCACTTGGC TCAAAAGCAA CTGTCTCAAT CAGACAGCGC ACACCAATCC AATCCCATGG

76621 AACACATTGT TCACCTTCAC ATGCTGGCAC CTTTCGCTTC AAAGGAATAA CCACATTTAT

76681 AATATAAAAG ACAAAATATG AGCGGAAATT GGACCCTACC AAAATAATTG CCAAAGCTGC

76741 CGAATACAAT TTCCGATCAC CATCTACCTC AGCAGCTCAC CAATGACGCA TCAAAATGGT

76801 CAAATGGAAA CCGCTAGACC GGAATCGAAA AAAGTATTCA GAAGCCATTC CTATACAGGG

76861 CTAAAAGTCA GACAGTCACA TACTAAAGAC ACAAGACATT CAACCCGATA GGCGAATAGG

76921 AAGACACCCG GCTCTCCTTA CCAACTGACC AACTGGACGA GAGAGATAGT CATTCCGCCC

76981 TAAAGGAGGA TTGATTACCT GAGGTTATAA AATACGCTCG ACCGGAAAAA ACCTTGCTTC

77041 AGGAAAAAGG ATTAAAGGAT TATTCCGAAA GGCTGGAAAG GGCTTAGGGC TTTCCTCAAA

77101 GGATAATATG ATTTCACTCA AGGGAGGATT AGCGGGGCTA AGCTAATAAG CTAAGGAGAA

77161 AGATCCTTCT GCGGGATTGA ATCTAAGGCT GAACCTAGAA AGACAAAGCA AGCATCGGCC

77221 GAACTCAGGG GGCTGCCCGG CGGAGCACCA CCAAATGAAG AGAGTTATCA CAAGCCTGAG

77281 ACGACTTCTA CTACTTCGCC AGCTTCGAAT CCTTAGACAA GAGCTAGGAC GGATTGAATC

77341 GAAAGCTTTG TTCTTTTTGG CTTAGACCGA TAAAGGGAAT AGCAGACATG GGGACATAGG

77401 TCATAGACCA CTTTATAACT TCGAAAGCAG CAAGTCTCCC TCACTAGGTC CGGCTATCCT

77461 CGGATCGTCT TTCCATAGAA GAATGATATA GAAGAAAGAC GGTCGGGCGG TTCAGATTGA

77521 CCTTTCATTC TCTTCCTTGG CTAAGTGTAT TGAACTAGCC AAGAAGGTAA CTAATGGTAC

77581 TTTTGATGAT ATGATCCGTC CTTGGGATGA TCCTGAGGCT CTCTCAAGTT GGATCTATCT

77641 TTTGTCCCTT GAAGACTTGA CTCTTGAGAT ATATGCCTTG GATTACCACC ATTCCGGGAT

77701 GACGTGGTCT CCAAACTGGA AGGCGCTCCC AACTTAGAAG TTCACTGTTG AGAAATTGAC

77761 CGGGGTGGAG GCTAGGACCA TTAGGTCTTG TTTTACTTCA CTTGCTTATG AGTTGGCGTC

77821 CTTCCTTTCC ATTTCTCCGT TTCTATGTAC ATGCCGCAGG GGGAAGAGTG GTCCCAAGGG

77881 TGTCTGCGGG CCGAGAGAGT TCGCTATCCG TTTGATTCCC ATAAGAAAGA AGGAGTTTAC

77941 TGGTAGTGAT CTTGATTGGT TCGAAAGGAC CGTACTTCCT CCATTGTAAT CAGGTTAAGT

78001 CGATTCCGAT CACAGGCCGA CTTGGTCAGA GGAGAGGAGG GAAAAGGAAG AGATTTTCTA

78061 TAGGCAACTA TGTCAGCTGT TGCGCCCCGT TCATGACTTT CTCATGTCGG TGTTGCGGAA

78121 GATACCACAA GATGGTACAT TCCACCAGAC TCGGCCTCTT GACTTGCTAG TTGGAAATCA

78181 GGTGTGCTAT AGTTTCGACT TAAAGTCGGC TACCGATGGG TGGCCTTTAG TCTTGCTCTT

78241 TGAAACTATG CTATGCTTGT TCGATAGGTC GTTCGCGTCT AGCGCGGTTC ATTCTGCGTT

78301 GACGACTAAC ATATTTGAGG TACCCTGGGT AAAGCGGCCC AGATCCTCGC TTTCTTTTGT

78361 AGCTGGACAA CCTCTCGGAT ATCACTCCTC TTGGCCCGCA CTTACACATC ATATTTGAAT

78421 AGGGTGATGT GCAGAACAGG TGCACCCTAC GAGTTACATA CTTGGAACGA GAAAAAAGGG

78481 AGAGATATTT TCAAGGTATG CTGTGCTCGG TGATGACTCC GTCATTGCTG ATCAGGAAGT

78541 AGCCGGTGTC TATGAGTCTG CTTTAATGTT ATAGCTACAT AACTATTTAT GTCTTTTTCC

78601 CCAAGGCGAC ATGAAAAGAC GAGGAATTTG GGAGTCAAAA TCTCATATCA AAAATCCCTT

78661 ATTTCTCACA CGGGCTCAGC CGAGTTCGCT AAGAGATTTA GAGTTCGGGG GTTGAGTGTG

78721 GACCTAAGTT AAGTTAAGTC CTATCTCAAT CAAGAGTTTA CTCAACTCTC ACCATCCATG

78781 TGGGCTAATG GCGGTCCATA TGAAGTCTCC GGTAAGGCGG GTAACCACCT TAGCACGGAT

78841 CGGTGGTGCT GGATTTCGGG TCTTAGCTCG GTTTGACCAT AAGCGCAGTT TGCACTACGA

78901 GCGAATTGTG GCTATGTGGA CTAAGTCGTG GCTCCCTCTC GATCTTTGGA TCGGTCGGGG

78961 TCGTCCCCTT AATCCGTATT GGAAGGGTGT CATTATTGAC TATCCCCGAA AGGAGATGAG

79021 ACCGCGCGAG TTAACCCAAC TACCAGACGA GATCTTTGAG CATTGCTAGG CTACTCTTAA

79081 CTTAATAAGT CATTTCGTCA GTCAGTCAGC AGTTCAGCCC GAGGGCAGGC AACTCACTAA

79141 CTACAGCTTC GCACTCCTCT AGGTCCCATT AGACTGATCC TTAGGGTTAA GGTGAGGGTA

79201 GTAATAAGCT TGATTGGCAG TTATGCTTAA AAGCTTTAGG ACAGAATCCA AAGCCGCTAA

79261 AGCCCTTAAC CGCCGGGTAC GGAATGGAAG GCGTACTACA TGGACTGGGT ACAGATTATT

79321 AAAGTGTAAG GATTTCAATG GCAATGAAGA AATTCGCCTT AGCCCAATAA GACAATACCG

79381 GAAATAGTGA TACAACTAAA AGAAGAGGAA CTCGAGATAG GACTTCCAAG ACTGAAACTT

79441 CTTAGCACAA TAAGCGACAT AGGGCGCTAA GCATTACGTG AACGACTAGG CCAATTAATA

79501 AGAAAAGGCT GAAACTAGAA AGAAATGATC GCAAATGGTC CTAGCCCGGC AAGACCATAG

79561 ACTGGCTATA CGAATAAAGC AAAAGAAGGA CTGACTTGCC CAGCAGTTAC CACAGTCTCA

79621 AGCTCAGGAA AAAAAAAGAG AAAGAAGGAG CCGGGGCGAT TGAAATTCAG TTTAGCTATG

79681 AAAAGGTACC TTCCTAAAGG CTACGGAAAT GCTTAAACAA ATACAAATTC CCTCCCTCTA

79741 CATCAGCAAC TAGAAGGCTT GGGACAAGCA AGAGGAAAAG AGAGGGTAAG GATTCTACTC

79801 GAAGGCGGAT GATGCTGGAA CTGGATTCTA AAAAAAAGGG GAGTACCCGA GGGAATAAGC

79861 CAAGGCAAGT GCCATAGATT TAGCTGTTGT CGGAAGTGGC AAGTAGACTA GAAAAAGGGA

79921 GGAGTGCCGG TTAAATGGTT TAGGTTAGGA GTGCCAGCTC AAGGCGATAG GCATAGTGGA

79981 AAAAGGCTAC GCACCTGAAT CTGTTCACAT GAATTGCTCA AGGTTGGAGG AAAAAGCACT

80041 ACTATTGAAT CTAATCTCCT GTCGGAATGG TAGATGGGAT CGATCCCAGT TCATCTTTCA

80101 AAACTTGTTT TCCAGTAGAA AAACTGGAAA ATCCTTCTCA AACTTAAGAC TTTGGTCTTG

80161 ATTTACAAAA ACTATTCTCA ATGGGAGAAA AGCCAGTAGT TGCTTATTCT GATCCTTACT

80221 ACCCGGGAAG CTCAGACAAC TCAAACACAC CCCTTGGAAG CATAATCTTC AATGGTGGAA

80281 ACTATCTCAA CTGGAGTAGG AGCATCAGAA TGGCACTTGG AGCAAAAAAC AAGCTTGGTT

80341 TCATAGATGG TAATATCACT AAACCTTCTT CTGATTCTGA GGATTTAAGT AAATGGATAA

80401 GAAATGATTA CATGATTAGA TGTTGGTTGT TTGCATCTGT TACTCCTTCA ATTGCTGATC

80461 AAATGATTTT GAGTGAGTCT GCTAAAATGT TTTGGGATGA TTTGCTTGAG AGATATGGGC

80521 AATCTAATGC ACCACAACTT TACATGATTA AGAAAGAAGT AACAGGGCTT TTACAGAATG

80581 AAATGAGTGT GAGTGAATAC TATGGGAAAC TAAAGAAGTA TTGGGATGAG CTCAACAGTT

80641 TAGATGGTTT TCCTGTTTGT GAATGTGGAA CAATGGAGAA ATGTTCATGT AAGGTGATGA

80701 AAAAGATTGC TGAAAGAGAA TCTAAGGGGA AGGTGATAGA TTTTTTGATG GGACTCAATC

80761 CAAAGTATGA TAACACTAGA GGAAACATTC TAGGAATGGA TCCATTACCT ACTGTCAACA

80821 AGGCTTTCCA AATTCTTTTG CAAATTGAAA AGCAAAAGGA AGTGACAGAA GGGAATGACA

80881 ATGCTGCTGA GGCTAGTGCT CTGGCTGTCA CTAAGCAAAA TGCTGGGAAT AAGTTAACTG

80941 CTGCTCAAAA GGATTAAGAA TGAACGAGCT CCTATTTAAT TAAGGTTGAA GAAAGGTTCG

81001 AAGAGCTGAG TCGTAAGACT CTGGGTAGAA GAGACAGTAG CGTCGTAAGA CGAAGGGGCG

81061 ACTACTGGAG TATAAAAAGT ACGAGGCTTA CTCACCCACT CGGGGGTATT GAGTAGGAGC

81121 GCAGCAGAAG GAAGAACCAA GCCTTATAGT AAGTAGCACC TCCCCTATCG CTGACCGCCT

81181 TGCGACTTGC TTGATCGCGC TACGAACCAA CCTTGTGCTC TCAGTTGGGG AATCAAAGGG

81241 AAATCCGATT AGAGCAGACG TAGTATAATG GGGCTTATTT ACCGGAAGAA AGGGGAGATT

81301 TATTTGAACC AATATCCAAC CAAGCTGGTT TTAAGCTTGA AGCAATTCCA GGGGAAACCG

81361 CAACCTTAGA GTTTGTACGA CTGGGTGTAT CCGCTGTATT GGGGGACGAT GGTAGAATAG

81421 GGAGTTATTC GGCTTTGGTT CGGGGCTACG CACCTTGGTT CTAGCAGCAC AATCTCCATA

81481 CCTTCCCGAC CTGCTATTGG GGAAAGGGCG AATCTTCCTT GAGCTAACTA AAACTATTAT

81541 TTACAAGTTA TGTCATGGTG GCCCATCGCT GTCTGATAAG GCGCTGTAAT ACCCGGGGAG

81601 GGGGTCCTTC AACTATTCTT GAACTCATAA CAGACTCATA ATAGAAAGCC TGGGTTTAGC

81661 GCTTTAAAAA GACCTATCAA TAAAGAACCC GAGAAAGCAT AGTTAGACAA GAGATTTCTA

81721 TCCCTTTGTT TAGCTATTGA GAAGGCTCCT GCTACAGCTA TTCTTTCTGC TTCACTGAAT

81781 AATTATTAGC CATCGCTTCC TTAGCTCTCC TATTGATCCT CGCCCATCTT TGGCTGCCTG

81841 TGAGGAGGTT TATGTTGGAC CTCTGCCTAC AAGTGCCGCT GCCATGTCTG CTTCTGATAC

81901 AGGTGTGTTT TGTTCTTCAC CATCAGTCCT CCTCTTCTTG GATTTTGGAT CCCGGTGCAT

81961 CTCATCACAT GACATCCGAT TCTTTTCAAA AATGGCTCTC GTCTATTCCT TTTTCCATTC

82021 ATACTGCAGA TGGATCCGAT TTGATTAACT TAGGGGATCC ATCACTACTG GCTTCGGCCC

82081 CTAATGCTTT TCATGTTCCT CGTCTATCAC TCAAAAACTT TATTTTAGTC AGATTAAAGA

82141 TTCAGGTCAG TAAGCTAAAT CCTAAAGCTA TCACCTGAGT CTTGCAACTC AGCTCTTCGA

82201 ACCTTAAAGG TAAGGAGTAT AGAATCCCTC CTGTCCGGTA CAAGGATTCT TTGAACTGGG

82261 AAGTGATAGA TCAATAAGTT CATCATGTTA GAGTGCTTCT GTCTTCGATC CAGTACCCTT

82321 TCTAGACAAG GTTTAATAGA AAGTCTCTGT TATTGACTAG TAGTGAATGT CCCTTTTTCT

82381 TTTCCCTTTT CAATGTGCTA GTTTCTTTCC GTCCATATAT ATCAATAGTG AGTTATAAGG

82441 CTAGACAGCA AATAAGCTAA TTCAGTTCCA TCCCTTATCC CTTCCTTAAC CAGAACAGTT

82501 AGAAAAGCAT TAAAAGGAGG ATTCTTTCAA GTGAAATCCA TCAGATCTAG GCGAGAAAAA

82561 TCTATGTTTA TAGCCCGTGT GACAATCTTT CTAGTCCTAT CTCTACGGGA AGTACAAACG

82621 GTTCATCCCT TAGAAACCCT TGAACCCTAT CCTCTCTGAT TTGGAAAAAG ATGATCTTGC

82681 TTGGGCCACT GAAGAAGAAG ATTTTTTTAA TATTGAGGAA TTGGACTTGG CATTCTTGCT

82741 ATCTCTTGAA TGCTTTGATC CATCTAAGCC CATTGACAAG CAGGAAGAGG ATAAATTGGG

82801 GGGGGGACTC ATGGGATAAT TATGGTTTTG AAGATACTGA ATTGCAAAGC CCACTTGATG

82861 GTTTGAAAAG CCCACGTCCG AGTCCAAAAT GGAATGGAAT TACTTGGGAA GAGTTGATGG

82921 GGGACACGGA AATTTCCAGG GTTCGAAGAG CTGAGTTGCA AGACTAAGGA AAGCCCAAAT

82981 GAAAACAAAT AAGAGTGGTC GTGGAGAAGG GGACCCATTG TACTGAAAAA GCTATTGCTA

83041 GTGCTGTACT GACTTACTCT ATACCGGCCT TAGTGGACTG ACAGAGTGAG CTGGAAAGGG

83101 GCTTTTCCGT CTTTCCGGGG AAATCAACTC AAGAGAGCTA GCTTCGGTCT CACGTAGCTC

83161 ACCTAAGAAA GGACGGACGA GTGAGGATTG GGCGAGGGGA GTTCAAGATG TACCTGGGTA

83221 CAAATCAGCC AATAAAAAAA AGACAAGTAG AAGCGAGTTC AGTCGGAGTA GGCAGGGCTA

83281 AATAGTGTAA GTAGGGTACG TAAACGAGGA CAGATCACAT GCTTTTTGTA CTGGTCAGCT

83341 TTGAGCTGTC GAGTAAGGAG TGCTCTATCT CTTAAGAAAG GGGCTTTGGA AACCTGCCTT

83401 ATTAGACGAG AAAGGGGAGT ACTCTCTAAT GTGCGTTCTA TTATTACCTC CTATTCCTGG

83461 GGGAGTGATC AGAATTAAGC CGCGTGGCGA TACCCGCCAA AAACAAAGGA CTATTTGATT

83521 CGCTTTTTGG GCAGGGCCTT TCGTACTCCA ATCCGTACGA AGAGAATTAT TCAGCACACT

83581 AAAATCTAGT GGATCTGGTT CCATATTCAT GAAAAGCCGG GGTTGAAACA TGTTATGAAA

83641 CTAAGACAAC AATTCTTACT AATAATAAGA AAGAGTTAAG CGCCTCCAAG GCCTATAAAT

83701 AGAAGCTTCT TTCAGTCTCT ATTTTCAAAG AGAGAGGTAG AAGTCAGAAA GAAAGACTTT

83761 CAGTCAAACT TAATGGATAT CATTGCCGAA AGACTGGCAA CAATTCAGAA CGAAATCCGT

83821 CAGGTAGAAA ACCAGAAGCT CCGATGTGAG CAAAGGCTTG GTCTGTTCTG GGAGCATCCG

83881 CCTGCTCTCG ATCCTGAGGA CGTAGGAAGA AGGATGCAAT CTTTACGGGA CCGCATTAGC

83941 GCTCTGGAAG ACAGGAAACG GGCCCTACTC AACGAAGAAC AAGACCTGAT TGTGCAGGCC

84001 GCCGGCCTCG CCCGCGATGA CCAGGGAGAC TAGAATAGAA GAGCCCGTCG ACTCGATTGA

84061 AATAAGTGTC TGTAGACGCA AAGTAGTGTG TTTTAATGTA TGGTCTTCTT CTTCTTTGTT

84121 TGGTTTTCTT TGTTGTGTTT GCATGAAAAC CTAGTCTAAA GTGTTCAATG CTTATGTTAA

84181 TATAAATAAG ACTTTTTCGA GCAGTGTTCT GAAATCACTT TATATATACT ATTATGACCT

84241 TAATGAACTG ATCGCTTGCT CTTGCTCCAT TCTCCTTTCG CTCTAGATGT TCCTGATTTT

84301 TAGTTCAAAA ACTAATGACC ATCTATCTCG AAAATTACCT TTCTCTAACC CTCGTCCCAA

84361 GCTAGACTTA GCCCATATCT TTTGCCTTGT CATTCTGATA CAATATTAAA GGAGCTCTGC

84421 CATCTCTATC AGCTAGTTAG CTAGCCGCCC TTTCCCTAGT CTTAGCTAGT CTCATTTTCC

84481 GACTGCATTG ATTTCGCTTG CTTCTCTGGC GATTACCTGT CCCTTGCTAA GAAAAGGGCC

84541 TTCCAGCGAA GCGATAGTAG TTAAGCCTTA CTCTTTAGAG TCAGTGAATT GGCATTACCT

84601 TAAGGCTGGG AACTTTCTTC AGATAGTCAA TCAGCCTTTT ATCAAGCCAA CTTACAAACC

84661 AACCCATGCC TCTTTTTTTA GGAGCTGAGC TTTTTCTGCA TTGATAGCCT CCTCCAGCAG

84721 ATCCAGGTTT TACAATTGTT CAATCTCCTC CCTTTCTTTG GGCTTAAGAA TGATAGGAAA

84781 GATCGTCTCT TTATTGTACT TTTCCACTAC ACGAAATGAA TGCTGGTCAC CGAAGGTCTA

84841 AGAGCCGATG CCAATGAATA ACTCTAATCT TGAGATCAGT TCAAATAAGG ATTTCATGAT

84901 CCGTCATTTC TATGGAGGTA TAGGACTCAA CAGGGTTTCG ATCTGTTTTG TCCGGCTTAA

84961 CAGAGGTCCT CTCACTCTCT CTTTCAGGCA GGTGATTGTG GACCATCTGT TAATGGATGG

85021 CTTCCAAAGC CAGGGCTCGA TCCTGCACAA TTGACCAGCT TCATACCAGC TAGTATCTGA

85081 CTTACTTAAT GCACTCACAA GCGTTCGCTT CGCTTACAGA TCAGAACAGA AAGGTGACCA

85141 TGAGGAAAGA TCCGTTGCAG TCCGGTAGCT AAGACGGAGT TACCATCACG CAGTCGTTGG

85201 ATAACGAGGC CGGCCTATCT TGGTTCGAAG TCTCGATGTC CCGTCGGTCC TTAGTTAGTT

85261 AGGCTGTATA CCACGATCGA GGTAAACAAC AACAAGGACT TCTACAGCGA CCAAGCGGGA

85321 ATAAGTTGAG GTTATGAAAT AGCTCGACTG ATAAGGAGAG GAAGCGAACA TATGAAATCC

85381 AATATCGGCG CAAAGATAAG GTTTATAGGC TGGAAATGGT GTAGCATCAG AGTGAATAGT

85441 TTATGTAGCT GGTAACTCAT TCACCTCTCC AGCTTTTCCG AGCTATCTAT CTCTAATTCA

85501 TTTACTTTAC TTAACTTACG AAGCCAGTCT CCTCTATAAG ACTTTCATTC CCTAGACCTC

85561 GTAGGCTGAT GATTGGCCAA CAGTATCAGT TCAATCTGGC ATTTCATCAA GGGTAAGGGT

85621 GTACACTATC AATGAACAAG TAGTTGCATT TACAGCAGAA GATAGATCGG TCCTCGTAGA

85681 ACGTTAAAGA CTTTCAGTCT GTTGTTCCAT ATCTATGGAA TTAAGCCTCT TAGGCTGTCT

85741 ACCTTTGATT CAATAGTCTC ACCTTGGCGG TCTACTGAGA AGGTCGTATC CATGGTAGGG

85801 AAAGGCTTCC TTCCTTGGTG GTACGTACCA GGGACCTCAC ACCTCTTCAC CAAGGTCTTA

85861 CTTGGAAACC AACCTGGAAA GCAATCCCGA ATTGTCCTTC CCTTACATCA CAGTTGATTG

85921 AAGGTGGTGT CAAACCAAAA GCATCGCTTT AGCTCTTCGC CCCAAGGCCG CCCACTCCCA

85981 AAATTGGCTG GCTATTCAGA ACAGGTTATT CACTAAAGAT AGGATGTTAC AGTGGCATCT

86041 GCCTTGTGAT CCAGTGTGTG TCCTTTGCTG CAGGGAGCCT TAGTCTGTGA AGCACCTCTT

86101 CTTCAGTTGT GATTATGCCA AATCTGTTTG GAGGTTCAGT TTAGGTTCAA CACCTGCATT

86161 TGTGAGAAAT AAGAGTTCTA TTGGAGACTT CACTATCCCG GGAAGATGCG AGTGAGAATT

86221 CGGCTTAGTT ACTTTCCCAG TAAGATAAGG AATCTTACGA CTATCACTGT CCCTACGACC

86281 GAGTGAGCTT TTCAGGGCTA TGACGAGGTA CGAAAGGAAG CAAGGTTTAT AAATAAGAAA

86341 AGGGGAAGAC GATTTGGCAT GTAGAATAGG TAGAGCATGA CTTCTTTCAA CTATTAAAGG

86401 ACAGGTATAA TTAAACAAAT TTAGAAGGGT TAGAATCCTT GGAATGGCAG TAGTAAGCAG

86461 AAATCCAGTA AATACCGGTG AACAGAGAGA AGGGCAGCCC TCGTAGTCTT ATCAACAGCT

86521 AAGAAAGAAG AACAGGAGCT ACAATTCAGT AAGTAAGAGG AAAGAAAAGC TAAGACATAT

86581 TTTAGTTTAG CTGTAGATAC TCTACCTACT TTCAGCTTCG ATCCGAAGAT TCTTACACAG

86641 CAGTTGAATT GCAGCTGAAT AACGTTGTTA GACACCTAAG TAATTTAACG CTGAATCTGA

86701 TAGTAGCATA AAAAAGAATA AGAGAATCAG CAGCCGGGTC GATAGACACA GGCTCGAAGA

86761 GACAAGTCTA GTATAGACGC CGGAAAGGAG ACCCAGTAGC GTTGATAGAC TATGGGTTAA

86821 GTGGGTTCAT GCAGTCTATA TTAAGAACAA TGGGTGGTGG GATTATGTTC CAAAGAAAGA

86881 TTTTCTTCTT ACATGAATAA GGTAAAAGAG CTCTAGTAGG AAGGAATCTA TCCAACTGTT

86941 TGAATTGCCT ACGATACTGA GTCGTTTTAC TTAGTTATTC AGCTCTGTCT GTCGCCACTT

87001 AGTCTGACGA CGTTGCTTAA GTCTTCGATA CTGAGTCGTC GCTCTGCGCC CCTTCTCTTA

87061 TCTATTCTAT TTCATTACCT TATCTTCTCT ATTCTATTGG ATTCACTAAG CCTAAGTCCT

87121 TAAGTCTCAA ATCATGCCCG GTTGGAATCG AGCCTAAGAT TCAACAACCA TATCCTGTAA

87181 ACAAAGCCTC CCCTTACAAT CCGAAGGACA ACATTAATCT TGTTCAAATC CTTAACTTTA

87241 AGCAAAAACA CAAGCTTTTA CAGTATAGGG GAGATGAAAA GAAAGAATAT CTGAATCTCC

87301 GGACCCTGAA CAACTCCTAC CGAACTAACG AGTTAGTGAG ACAGGGGCTG GCTCACGAAC

87361 GATAACACAT AAGCTAGTAT TGAACTAGTA TACCTTACTG CAGTTCCTGC AGCTAAAGCC

87421 TAATAAAACT AGTTAACCAT TCTTCCTTGT TCTTGCAGCT ACCTTCTTAC TTTAGCTCGG

87481 ATATACCTTC CTTTTCATTC TTCTAGGAGA AATATGCTGT TTAAGAGGTC TAAGGTAGTT

87541 TGATACTCTA GAGTTCCTTA ACTACGGTTT AAACCCTCTG CCTTACTAAG CAGCTGATAA

87601 AAAGATTTTG GACAATAGGA AGGATTAAGA GGGGTGGTAA CAGGAACAAC ACCAGTTATC

87661 TGCTCACTTT CAGAAACAAC AGGTTTCTCA GACTCAGGGA CCTTCTTTGG CACCCATTGC

87721 TTTGACATCT TCTTCTTAGC AGGAAACTTT TTAGCACAGT CATGCCCAAG TCTTACAATA

87781 AATAAGGTGG AGTCCACTCA TACACCACCT TTTGTTCCCA TCAGGCCCAG CAACCCAGGG

87841 CATAGGTTTT GATTATGGCG TTCTTCTGCT TCTGATAACG TTCTATTCAT ATTCATATTC

87901 TTCAAGTTGG AGAAGTCATT GCCTGAACCA AGGCTTTAGT GACTAACGCT TTAGGCTTTC

87961 GCTACCGCTC CGGAGTTGCT TGTTTCCTTA TTTCAGGGAG TGAAGGAGAA AGAAAAGAAT

88021 TAGAAGCGTC TCTCATCATA GGTTCGCCAA TTTATTGACT CTTGCCAGGT AGCCCGATGT

88081 CTCATCGTAA GATGTTGGTG AGTCTTAGTG GGGCCAAGGG CTTCTTCACA GCCTGAACCC

88141 GGTTGTGCTA TTCCTTCCCT TGCTTTATTG AATCCCGTAA GTCACTTCGT TCTCCAGTCC

88201 GGATTTCTTT TCCTTCTAGG CTTCTTCCTT CCACCAATCC ACTGGAACCT TATAGCAAGA

88261 ATAGCCCTAG AGGGTTACTC CAGACTTAGA CACTCACTCT ATCTATTAGG CTCTCTTTTG

88321 ACTGCTATGA GACTTATTAA CAACGTATGA TAATTCAAAC CGGTAAGAGG ACTAGATATT

88381 TGAAAGACTG TTCCAAGCCC TACTTGAACA TGTCCACGCC TTCAACCTAT AGATATCTAA

88441 AGTCCTTCTC TTCCTGAGAC TGAGTTTAGT CAAGCCCCAT CCCCGAGTCT CCTTCGGACT

88501 GAGCTTCCCG ATTAGTCACT CATTTCGCGC TACTATTGAA TTTGGTAAAA AACACAAGAA

88561 GGGAAGAAAG AAGAGAACCT CGAAACAAGA GGGACGATTG AGAAAGAAAA CAGAGAATGA

88621 TCTTACTGCT GGAAAGAGAG TTTTTGATCC TTTCCTTCTT TGGCATGTCA AATCGGTCTT

88681 TCTGACCATT CTATCGCCTC TGTGTACTGT ACCTGGACTT TAGCGTCTAT ATCTTTTTAG

88741 GAGGGCGTCA CTAAGAACCC CTTGTAAAGA GAGCTTGACG TGAGTTTCAT AATCCTTAAT

88801 ATCTGATGCT TCTGAAGATG AGGTAAAAAG GGAGACTGGA AGATAGGAGA GTCCTAAGGG

88861 CTGACTCCTA GAGGGCTCAT TTGGAGAATT GTTCTAGGTC TATCCCAGGC TTATTCTTTC

88921 ACTTCTAAGG GGAAGGTCTT TCCGAGGGCT AGGTTCAAGG GCTGGTCGAG CTATTTCATA

88981 ACCTCACCAC AAGGGCAAGA GTGAGTCTTA CAGTCCTGAT CTTATGTTTC TTCGCTTTCG

89041 CCTTAGATCA AACAAGGAAT TTCACTCTTC TAAATAAAAG ATGTCGGGTT ATCAGTCTAA

89101 AACTTTCTTT GGCGTTCCAT AAGTCAGTCT GTAAATAGCT TTCATCTTTC GAACTGAACG

89161 TGCATCCAGC AGGAATCGAA CCTACGAATT AACCCCTTTT GTTATAGGTT TCGCGCTTAA

89221 AGCATTCGGC CATGGATGCA AAAAGACTAA GCGAGTGAAC TAGGTTTTAG TATTCCTTCT

89281 CGAGCTTCTA TTTCTTCCGT TAAAGGAGAT TCGAGAAAAG ATGGAATAGG AAGACGTGTT

89341 TCCAGAACAA AGAAGATGCG GGTTGAGAAG AGGAAGTTAG CAAAGTTAGA CAAGATTGGA

89401 ATGAGCATAG GAACATGTAT TGATGTACCG GATCGGCTAA TGCTCCCAGG TTGATGCGAT

89461 GTATTCCACC AGTTGACTGA AAACTTGATT ATTGGTATAT CGATCGGTCC AGCACGGATT

89521 GAAATAGGAG CCGGTTCTAC AGGAAGCTTT TGAAAACACA GCGCACCCAA GTAAATAAGG

89581 AACGAGATGA ATACAGAAGT TAAACGAGCA TCCCACACCC AAAAGGTGCC CCACATGGGT

89641 CTTCCCCGAA ACCCCCCAGT AACTAAGGTA AACAACGTAG AAAAAGCACC CATTTCTGTA

89701 CCGGTTCCGG AAGAGCGAAG AAAAAGAGGA TGTTTTGTTA ATAGGAACAA GAAAGTGTTT

89761 ATAGCCGTAA CGATATAAAC AAGAATACTC ATCCGAGCCA CAGGAACATG TACATAGAGA

89821 ATACGAGAAT TTCCACCTTG TTGAAAATCT AGTGGTGCTA CCCAAAGACT TAAATGAATA

89881 GCCATCGCTG TTAAGAACAA CCAAGATCCA ATGAGAATTT GCGCGTAGTT CCTGGTCTTT

89941 GACATCAAAA AATAAGGTTG TAATAACAAA ACGGACATGT GATAATTTGG TCCTAACTAG

90001 TGGAACAAGA AAGACATGGA TCTATATTCA ATACGCAATC AAAATCTTTC CTCCAAGAAA

90061 ATCGGGGGAT TCCCCTTGCT TTGTTTTCGC TCCGCTCGTG CGTGGCACTC TTTGCTCGCG

90121 GAGCGGCATA CCGAAAAAAA AGACAGGTTT TGGAAGAAAA AAAGTAGATT CCCTTTTGTG

90181 ACCAAGAGCC CATCCTTGAT CCAAGCAAGC CGAGTTTTGC GTTCCTTAGC TTGGTGCAAA

90241 AGGCTTCTCG CGGGTCCTTT TGGGGACTTA CTCGTAGGGC ATGATATCCA AAAATTATTC

90301 AAGTACTTGC TTTTCTGAGA AAGAAGTCGT CTTGGTATTG GATCCGCTCT TCTGTTAGCA

90361 TGAACATGAA TTAGATTCTA TTTGTCTTCT TTATTCTTAA GAGAACCTCC TACCCGAACC

90421 ATTCTTAAGA CCGCCAAGCC TTCTCGAACG AGTTCTACTA TAGAAGCTTT CAACGTAGAC

90481 CCGGGGAAAA ATCTTTCACT CACTGAGAAG TGAAAACCTG TGACTAGATC GTCCTGAAGA

90541 CGGGTGCGAC GGGAAGAAGT GGCATTTGGA AGTGTTGCTG ACTTAACATT TAGGTTTCGA

90601 CATAACAAAG CTTGCACTGT CTTTTCGCAC TTAGGCGCGC AGCGTGCCAT TGGTAATGAT

90661 TCTACTACGG TTCCACAAAT TCGCAAGCTG ACCCTAAGTA ATCGTTGTTG TTCATTGGAT

90721 TCCGGGGGAA CTACTTCGTT AGGATTGGGG AATTGCTGCG ATTCTTCCTG AATAGCCTGG

90781 ATTCTCTCGT CGAGAGTCAC TTTGAAAGTA TTACCTAAAC TCTTTCGACT GAATATGATA

90841 AAGCCTATAA AACAACGAGC TACTATCATT TCTTCATTAT AGATTGAGAT CTTCTTCGAA

90901 CTTGATGCAC AAATAGATAG AATAGCAGCA AATAGCATCT TTCTAGCCTG CATCTTCGTG

90961 GAACTCTTTC TCATTTAGAA AGCTTATCTT TATCTTTCAG CAACTGAACG GGAAGTTTCT

91021 TAGGAAAGTT CGAATCGGAT GCGCTCGCCC GGCGAGAAAG GCCCTGATCC TGCCAATCAA

91081 GTAAAAAGAA AGAAGAGAAC GAAACAACTT CGTATTTTGT ATTTTGGTAA CTTTCTAGGA

91141 GTCATGTTTA ACCTTGAATG CTATTAATAG ATTCTACAGC AATAGTCCCC CGGACTCGGA

91201 AAGTAATAAC GAAAATGGCT AACCCAATAG CAGATTCCGC GGCTGCCACC GTTGGAACCA

91261 ATAAAGCAAA TGATTGACCC ATCATATCAT CCGAAGAAAC AGAAAATACC AAAAAGTTCG

91321 AATTCACTGC TAATAACATT GATTCAATTG ACATTGACAT AATAAGAATA TTTCGTCTAT

91381 TAAGGAGAAT ACCCCGAATA CCTGAAATAA AGATGATCAT AGAAAATGTA AAATATTTGA

91441 TAGAATCCGT TTCGGGAACG TAGAATGTAA GAGAAATTCA AATGTTATAA CTCCAGTACG

91501 TCAAAAAAAA CAAAGAAAGT AATAAGTCTC TAAGGTAGGG GAAACCCGAA CGAGCGACGG

91561 AAGTCTTCAT CCGTAAAATG CCGGTAGAAT TCTCGGTAAA TTTGGGAATT TCTACCGTGC

91621 TCGTTGAGTT GCTCAATAAA GGACTCCAGA TTACTGGACA TGAGAGCACG CTGATCAGCA

91681 AAGGACGGGT CGTTGAACGG CTCCACTTTA TCTTTCAAGA ATTCATAGGC TTCCCTTCGA

91741 ATATCACTAT AAGGCGACAG CTCCAAAATG GTGGAGATAT TTGGCTGACT AAGCATTAGA

91801 TGAAAGAGCC TATCTTGCAA TTGGCCCTTT TGCTCTAATA CTTGTAGCTC AAAATACTCC

91861 CGGTCATAAA TAGATAAAAA ATGGTCAACA GTCCGTGCCT GGTCGAAGTG ATTTCGCACT

91921 ATGCTTTCAT ATTCTCCGAT CGCACTCTGC GGGGGAATAT TATAGTATTC CCTTGCCTGC

91981 AGTGCTCGGA TACGCTGATA AATTTCGGCC TCGTTGTCAG CCGCTATAAC ATTTCGATAC

92041 GTCCCCAAGG AGTCAGTGCT AGAGGAGGAC TCCAAGTGGG GAATATTAAT TAATTCCTCA

92101 CTTGAGGATG ATACGCTAGT ATGAATCAGG AGGATTGCGG TTGTCAAAGT GCAAAAGAGC

92161 TGAGGAAATA TTAGTATTTT GCATAATGAA GAGAATAAAA TAATGAAAAA ATATAGCAAA

92221 ATAAAGAAAC TAGATTTTGC TTTTCTCTGT CTTCGATAAA GCAAAATCAA AATCAAAATC

92281 CATAATAACA AAAGAAGAAG AAATGAAAAA GAATGCTTGG CAACTACCGT CTTTTCTAGA

92341 AAACGTCCGA TGCAGTTCCC TAAAAAAATA CTCAGAATGG ACACAGATAC TCTACTTAGA

92401 AATAGAAACC AACTTGAATC TGAACGATCA AGTCTTACCG AAATCGGATT TCCTTTTCGT

92461 GCCATATATG CTTAGACTTT ACTTTTTTCC CCCTTTTCTT CCCGGTTCAA TCTTTTTTTC

92521 GAAGGTCTTC GTCATTCTTT GTTGATTCTT CCCCTCTTAT ATCTTAACTA TATTATATGA

92581 TTACTGCCAC TAGTAACAAA GCTCAAGGCT ATAAGTAGGC CGTTTTCTAT TGCTATAAGG

92641 GCTGCTCGCC TTTATACGGC TTGGCTTCGC TATCGCTCCT ATTTATTCCT ATATAGTGGT

92701 CGGCCTAAAA AGCAGTCTTC CTACCGGAAT GGCCATTCTC TAGTGCAGGA AGTTTCGCCA

92761 GAAGCAAGCA AGACGAGGTC GCTCTGCTTT GTAGACAAGG CTCGTTCCGT ACTTGACTTA

92821 CGAGCTCGTG TAGTACTCGC CTCTATCTCT AAAGGAGCTT ATGCGCTCTA CTTGCTTTCT

92881 ACTAAACGAG CGAGCGAAGC CTTCTTAGTG GCTTCTCTTC TTTTTCCTCA CCCTATTCTT

92941 TCATTTCCGC TTAAGCTTCT CCGGTTTAGG GGATTAATTG ATTAGATACC CGAGAACCAT

93001 AATCTTTCCT AGAAACTGCT TCTACGACGA TAGATAGGGG TCAGGTTTGT TTGGCATCTA

93061 TGCCTCCTGC CCTCCAAACA GTATGGGAGC CTTTCAGCTC GTACTGCTCA CACTCCTAGA

93121 TCTTCACGGC ACCTCCTCCA CCATAGTGTG AGCCGGGAGC AGCTCCGAAA AGCGAGGCCG

93181 GCTCACAAAT TCGCTTTCAA CAACGTCAAC AACACCACGA AAAAAGGAAA CTATGGTTGC

93241 CCACTAATCT GAGATCATAG GTGAAATCCA ATCCCTTCGC TTCACGCCAG GCTTGGAACC

93301 TGTAAGTAAG GCTCCCCCCT CGGAAGCGGC GAGCAGCTTT GCGCCAAACC TTTCCCCCCT

93361 TTTTTAATTA GAAAAGCTCC AACCTATACA AGGTTCCGGA AGAAACCCAG CTGAAGGAAG

93421 GGCGGCCCCA CCCTGTGAAA CAAAAGTGTA CGTACATAAA TAAGAAGGCT GGTTATGGCC

93481 TTGGCTTTCT AGGGCTCCTT TCCATATATC TTGACCGGGA AGAGAAGAGG GGGGGCTCTC

93541 GCGGAAGCCC CGCCCGCCCT TTTCTATTTT GAGGGATCCC TTCTATTTTA TATTGAGGAT

93601 CCCAGGCTTT CCGGCCGGAC TCGTAACAGA CGGCTATAGG AACAAGAAGA GGCGGCGGAA

93661 GCCGTTGCGG GTCCTTCTCC TTCCGCTGAA ACGGCCCTCT TTTTGTCTTT TGTTTGTTCA

93721 CCGCGGCACG AAAGAATGAA GAAGCTAGAA TGACTCAGAA AGAGAGTGGC ACCTAGCCGT

93781 TGAGAGCGTC TGTTCTCTTT GTAGAGGAAG AAAGAGTACG ATCTTGGACT GGCCCCCTTC

93841 GCATGATTTA GAAAGAAAAA GAAGTCCGTG CTACTATAAG GCCTCTAAAC TCCTCCCTCA

93901 GGACACTGTT GCGTTGTCCA TGGGGACGGG GTAGCCCCGA CTTCCATAGG TCCTTGGTTC

93961 GATCTCCTAA TGAGAATGGA GGTCCTTGCG CGGGCGTCTC ATCCCTAACC TAAGACTTGC

94021 TTACTCTGGT ATGGAGTGCC CCGTGGTTTA TCAAGTGCCA GCCGCAGAGA GGAATGCCGT

94081 CAACTAGGGC GCTATTGGCC ACTAACCACT CGCTCGCCGG CCGCTCGGGC TCCGCGTTTC

94141 AAGTTCGTTA TCCTAACCGT CTTCTCTGCT TCACCGGGAG CCTGGCCCCT TTTTCTATCT

94201 TATTGACTGC CGTGCTCCTC GGCTCCCTAC TGCTCCAGCC GCTCGCTGTA AAAGCTTGCT

94261 TTTCGGGCGG CTCGCACCCC GGGTGGTGCG GCTGAGCCAG AGTGGGCTCA GCAGTCGGCC

94321 TATGTTTTCG GGCGCACGCA TAAAAGCATG ATTAGTTCCA CAAATTTCAC TGCACTGACC

94381 ATAGTAAACT CCTTCTCGTT GTACCAAAAT AGAGGTCTGA TTTAAACGAC CAGGTACAGC

94441 ATCACATTTG ACACCTGAGG AAGGTACAGC CCAACTATGA AGTACATCAG CAGATGTTAC

94501 AATAATACGT ATATGAGTTT TGGCTGGTAC AACCACTCTA TTGTCCACTT CTAATAAACG

94561 TGATTGACCC AATTCTGGAT CATCTTCGGG AATCGTATAA CTGTCAAAAG TGAGTGACTG

94621 TTCATCGGAA CTGTTATAGT CCGAATACTC ATAAGGTTGG GTCGACGCCC GCCTCCCCCC

94681 AAACTGTACT TGCAAGTTTC CCCGCAAAAA GCTCTCCACG CCTACTCTTA GAAAGAGCAC

94741 TATTTTTCTT TAGTTTGAGG CGACCGTAAG GCCCTTTACT TTATGAGTAA GAGGAATCGA

94801 AGGCGAAGGA AATGAAATTG ACTTACTCTT TAGAGCAAGG TAATGCCAAT TCACTTACTT

94861 GGAACAACGA CGAAAGTCGA CTTACTGACT TTTTTGAAAG TAAGGCCGGG AAAAGTGTCT

94921 TGGCAATTGG GGACCCCTTC TTAGCCAGCC CTACCTACCC TATGTATTCG AGGGGAAGGC

94981 TGTAACCGAA AAAGACCTGG TTCCACACAC ATAGGACAGG CAGAAGGTAT GGGACGACCA

95041 GTTCACCACG AAAAGCGAAT TCTATCTTAT AGTCGTCTTC TTTGTTCGAT AAATGCGCAG

95101 TGGAAAAGGA TGCTAGTCGG CTCGGCGAAG TTGTAGGCTC TAAGAAAGAA GATCCAGAGT

95161 GATTCCTCAC CTATCCTGTC GGGGGCCCAG TTTAACGCTC GAGTATAGAT TTTCCATGCT

95221 CATGTGAACG GCCGGGGCAT AAAGCTCGTA GATCTAAAAG GATCCATCCG TAGGCCTGAC

95281 CGGATATCGT GAACAAAACA AAAACAAAGT TGGTTTTTAG TAGTCGTTCA TGAGACCTCG

95341 AATTCCCACG TTCCAGCGTG CATTATGCCA ACAGGTCCCA TCCCCAACTC TAGCTGAGAA

95401 GTTGAGTCAC CCTTCTTTCT TTAACCTAAC TATAAAAAAA GAGATAGTAC ATATCCTGTA

95461 TCGATCATAG GATCACTCTA TGAATAGGTC AATTCTCTGT GACCCCCCAC CGTTCACGAC

95521 ATCCCTTGCT TCTCGCTGCG AGCGGCTCCT CGGTGCGGTG GAAGAGTAGA AGCGCTGGTC

95581 CCCTTCGGTC AAGTTGCTTG TGCCTGCTGT TACCTACTGT AGGACCTCCG TCCCCGAAGC

95641 GAAGAAAGAG GAGCAGGCAA TAAGGTTCTT TTCCTCTCCC GGCCCAGTAG TTCCGCAACT

95701 ACTACCGTGG TTGTTGCCAG CGGGGATCCC CCATTCCGAA AGGTTACTGG GCCGGCCGTT

95761 AGGTCCAAAG TTTTATGCCA TTGCTATGGT GCCGCTAGAT TCACTACTTC AGCGCCGTTA

95821 TCGGACATTG CGGGCTGAGC ATCTATTTCT CGTATATCGC TCTACACCGA GAAGAGGGAT

95881 GTGTACCTCC AGCAACAACA AGAATGGAAC CATAGGCTCC TATGCTGAGA GCATTTCAGG

95941 GTATAGGTCT AATCACCTCA ATCAACTCCC CGTTTCTGGC ATGCTATAGT TAGAAAAGTC

96001 TCTCGACGAC GGGAATGGGA GATTACCAGT AAGCCAGATG CTTTGCGAAC TATATTCCAC

96061 TTTAAGGCAT TTCGTTGCAC TTAAATCACC TTCGTGAAGA GGCGCACTCC GATACCATTG

96121 ATGTCCAATA GCTTTGATAG TAATGGCTGG ATCTACTACT ACCTCGTCCA TTGAGTATAA

96181 CAGAGCAAAT GATGGTATAG CAATGAACAT AAGGATGATA CTTGGAAATA TGGTCCGAAT

96241 AATCTCGATA GTAGTTCCAT GAACAATCCT TTGCGGGATT GGATTTTTTT TATAGTGGAA

96301 ATGCCATAAA GCGCGAACCA AGATCCATGA TACGAAAACC AAAATCAGAA TGAGGAAGAA

96361 AAAGATATCA TGATGTAAGT CTATTATTCC TTGCATCATA GGTGTTGCTG CGTCTTGAAA

96421 TCCTAATTGC CATGGTTCCG CTGCATCACA AGGAGCAATT GTGAAGAATA GCCATTCTCG

96481 AACAATCATT TGGTTCATTC TTTGACTGCT CTGCTCTCTC GAGAAATCAA GAAAGACTTG

96541 TCAGAAATCA CCGGTTGGGT TTTCCAACCA GGAAAGGCAT GGGAGTCTTT CTTTGGCAAA

96601 TCAAAAAAGG TTTCTATTAT CGGCTGCGCG CTATCGGAGA GAGAACAACG GGAGGCTCAG

96661 TCAAAAACAT TTACCGACAT TCAGAATCAT TTTTCTTCAT ATACGCAATT TCGATAAGAG

96721 TCTAGCCAGC TCGTCTCCGC AATACTTCAC TATGGTGAAT ACGTTTTTCT GGCTTGCCAC

96781 ATACCTGGCG AACTAAGCAG GAACATGTGA ACTAAGCCCA GGGGATGCTC TCGGATTGAA

96841 AACCCAAAGC ATGCTCCTGG ATGTTAGAAA TCTTTCAATC CTTATTCTAA GACGGATACT

96901 GGACTTCCTT ACTTTACGAT GACACCCTTG CTAGATTCAA GTTATCCTCC TTTAGCTTTG

96961 ATTCCGCTAA CACAGTACTC CTCTAATAGC TTCTTCAATG GCATCATAGC ATTCGATTCC

97021 ATTCAAGGTA GGTAAAAGAA AGGATGGACT ACAAGGGCCC TAACCACTCG TTGATTGGGG

97081 GAAGCTGCCT TGAAAAGCAT ATCAGACTTC AAACCTTCTT CCTTCTATGA TCGAAGTGAG

97141 TCTACCAGAT GGGTAAGAGA AGCAATATCT CCCTTTGGTT CTGCTTTCGC TGTGATGCTT

97201 CTTTGTCTTT CTTTCTCATC CGTCTACTCG ACATGACTAT ATGACAATCT CGACTCTTAG

97261 GCAGAGGAGA GAAAGCCGCT TCTTTACATG GGCGAGTCAG TCACAGACCG AGGATCGGAG

97321 TTGTCCCGTT CGATTGATCG AAAAAGAGTC CCGGGCTGTG TTGGTAGGTG AATATCCAGA

97381 AGTTCATTCA CAGACAGGTA TGGCAGCAGG TAGGGTTACT AGTTTAAGTG GGCCAAGCTG

97441 CCCTGCCCGG TCAATCATTC TGCCATCGAA GCAGTAGGAC GTATGGCTGG GCTAAGGTAA

97501 GCTAAGCAGT TGGTCTAGAA ACTAGGCTCG CTGGAGAAGA GACTCTTTAT GTTATGTCAG

97561 CTAAAGGAAT TGCATTTAGA GTAGACTGTC AGTAGTGGTT GAGCGACCTG CCTTTCTTCC

97621 CCCCCCTTTT TCAGACTCAG AAACGACCCC AGGACGGGCT CTACTTTTAA GCCCTGCCTT

97681 GTAAAAGACG CCGCCAAGGG GACGGACGCC TAAGCTCATT ATATGGAACA CATCTTTTTC

97741 GGCTTCTGCC CTGGTGCCCA ACTGAACAAA ATAGTAGTAA ACCAAAAAAA TATTGAAAAA

97801 AAAGCAAAAC TAGCTCACTG GAAAGGGTAG GCATAGCTAA TAAAGAAGAC GGAACTACTA

97861 TTGTTTGTTG TATTTTCACC GGTTCAATCA CGGGAGGGCC TTATTCCTGA AACTAAGGAT

97921 GAAAATTGGA CGATCAGCCA ACTAGTCATA GATCTTAAAC TGGGGTGGGA TTACTTAAAG

97981 GCTTAGTCCG CATTTCACTT CGTCATTCCA CGAATCGACG GGCTTAAGCA CCCCGACCGA

98041 GCCGAGTGCG GGGTTCGATG GAATTGAAGG GAAAAGATCG CTTACTAGCT CAATGCCACT

98101 AACGAAAAGA ACTGACTCGC GAATCAACTC AACTTACTTG CATCAGGAGA AAGACTGCTG

98161 TTATCTACTT CACTGCGGAA AAGCCCAAAA ATGGAATTTC GCTTATCATT TTCTTTACAG

98221 TGATCGGTAG AGATGCGATC ATTCGTTTTC GTTTGTAACG AAGAAGGCTG AAGAAGTTAT

98281 CCTCCCATAA AGAGAAGAAC TGGTAGGGGG TCTAGTCTAC CTATTATGTC AATTCACTGA

98341 GTGGTTCATC TTCTGCTTAC ATTCTTTTCG TGGGCGAATA AAGAAAGTAG TGAATCGCAC

98401 GCCCTGGGTT CGGGGTGAGG TTGATTGATG TCGAGTCAAA AGGTAGTGAC TATTATATCG

98461 TATATACATG CGAGATGCTC CAAGCGGCTT CTACCCTCAT TTGTTTTCTA CCATCAACAC

98521 TCACTCTCCG AGCCTTGATG TCCAGCCGCT AATGGTCTGC ACATCGTCTT TTCGAGCTAA

98581 CCGAATGTGA TAGGGACTCT TTTATGTGAT ATGTAATAGA TAGAGATAGG CTTGTTGGAA

98641 GACTCTCTTT CCCTTGCTGT TAACGCTTTG ATCTGAGGAA GAGAACAAGC ATAAGGGTGA

98701 GCGCGCTAGC GCGAAAGCCG TTTTAGTTAG CGCTATAGTT TGGTTGGAAT CCTTTGAAGT

98761 TGTTGAAATT ATGAGTTCAG CTCAGGGCAT ATGTTGTAAA GTGTCTGACC TGCATTCTGG

98821 TTCTGACATC TATTTTGTGG CTGTGTATGG TTTGCACACC ATTGAGGATA GGAAGAGTTT

98881 ATGGGATGGA CTTCTAGCCA TTTCTTCTAG TATCCAGATA CCTTGGTTGA TCTTGGGGGA

98941 TTTCAACTCC TTGTTATCTT CAGAGGATAG ATGGAATGGT GCTGTGGTGA GTGACCTAGA

99001 GACTGTGGAT TTTCAAAATT TTCTGGACTC TGGGGATCTA GCTGTCCTAC CTAGCACTGG

99061 ACACTTTTAT TCATGGAGTA ATAAGGTCAT AGGATTTGCA GTAGAATTGA CTTGGGTAAT

99121 GCTAGCTGGC TTAATCAGTT TGGTTTAGCT GCTGTTGAGT ACCAAAATCC AGGAGTTTCT

99181 GATCATTGTC CACTAGTAAT AAAATGTACT GATATGCAGG CTCTTTAGAG TTGGGCCGTT

99241 AGGCACAGAG TCGAAGAGCT GAGCTTTTCC CATAGGGCTC AGTATCCTTG GAGACAAATA

99301 GCGTCTAGTA TAGACGCAGG ATGGATTTCG TTTTTTCAAC TATATTATAT GGTGCAGCAT

99361 GCTCAGTTTG CCCAGGTTGG AGGAATGATC AAACTGGCGG TACAAGTATG AATAAGGTGT

99421 GGGGTAAACT GAAAGCTGTT AAAGCTGCTA TCAAGACTCG GAAATTGATA TCATTAGTAG

99481 TGGATTTGAA GAAAAAAGTT AATGACATAT TGTTCTAAAT TTGTTGGTGC AAAATGGAGG

99541 AAAGTGTAAT GGCTCAGAAG TCAAGGATTC AATGGCTGGC TGGGGGATTC AAATACCCAG

99601 TTTTTCTTTA GAGCAATGGT TAGGAACCAT ATTAGTATCC TATATGATTC TCAAGGATGA

99661 TCCTACTCAT ATTGAGCAGG AAATCAGGAG TTTCTATTCT AATTTATGGG GGAAGGCTTC

99721 TGGGACAAAG TCTATTTTCT TTGGGACAGG AATACCCCTT GATCACTTCT GTCAACTTCT

99781 ATACCCAAGA AGTACCTCAA CTGACCCAAA TCCTTCATGT GAAATTGAGT TGCTCTTTAC

99841 TGCTGATCAT TGCTTTGTCC AATCTCAGAA AGGACACTCA ATTCCTCTTG GTAGCTTGAA

99901 TGCTGGGTTG TATAGTGTTG ACAAAGAGTG TTCTGCTGTT GAATCTGTTT CTTCCACTGC

99961 TCAGTGTTTA GCTGCTGTTG ATGAGGCCAA ATTGTGGCAT CTCAGGCTTG GACATCTGCC

100021 CTTTTTTATG CTGAAGTTGG TTAATCCTAG TTGTGATGTA AAAGGTTGTT TGTTCTCTAA

100081 TATTTGTACT GTTTGTCCCG CTGCTAAGCA AGCTAGATTT TCTTTTCCTC TTAGTAGTAC

100141 TCAGTCTACA GCACCTTTTG CCTTGGTTCA TATTGATATT TGGGGTCCCA ATAGGGTTCA

100201 AACATATACT GGTTGTACAC AGTTCTTAAC AATTGTTGAT GACTTTACAA GATTGACTTG

100261 GATTCATCTT TTGAGGAAGA AAAGTGAGTT GGTGTTATGG TTGATTTTGC CAAGTTTGTC

100321 AATATTCAAT TTCATGCTAA AATCCAATGT ATAAGATCTG ATAATGCTCA AGAGCTGTGT

100381 GAGGGGGCTA TGAAATGATT CTATAAGGAT TTGGGGATAT TGCATCAGAC AAGTTGTGTG

100441 CATACACCAC AACAAGGAGA GGAAACATCG ACATTTGTTG TAAGTTGCTA GGGCACTTTA

100501 TTTGCAATCT AAGGTTCCAG ATAGGTTTTG GGGTGAATGT GTTCTTTGTG CAGCCTATCT

100561 TATAAACAGA ATGCCATTGA AACCATTGAA TTTTCTTACC CCTTCCTTAT GAGAAATTTT

100621 ATGGTACAGT CCCTAGCCTT GATCATCTTA GGACGAGAAC CCCTTTCCTT CTTTTAGTTG

100681 TTCGCCAGCC AGGAAGTCAA TATATGAATC CGGAGGAGAA CTTCGGGCAA TAATAATGGT

100741 GGAAACCCCG AATCTTTTCT TTTCAGGTCC GAAATCAAGA TTTCTAGCTG AAACATACTG

100801 TTCTAGTTCT TTTATGGGGT TCGGACAAGA CCCTTTCTTT GAAATCCAAC TAAATAAAGT

100861 GAAGCAAATA TGGCGGTAAG TAGAGGGAGA AGATTCGAAC ATTGGGGTGG CTTTCTCTTA

100921 ATTCTATTGA AGTAACTTAG CCTAACGATA GGTTACGGCA CACTGGCTGA GGTCTCAACT

100981 CCTTTTCTAT TTCGAACACG TGTAAAAAAA CCTCTTATCT TTCGATCAAT ATACATGTTA

101041 TATGTCGTTT TTAGACTCGA ATTAGTCATT TCCTTATTAA GGAAGGCCTT AAACTCGTGC

101101 AAAATTTGCG TATAAACATC CTCTATTCTT TGTTCAGCTT CATTAGCTGA GTCAACTATA

101161 AGATTAGTTC TTTTAGCCAT GGGAACATTC AACAGTAAAT AACTCATAAT TTGATAGGCA

101221 CTAGCAGATG CGTCTTGGGT AATAGGGGCT TGGAAATAGT AATACAATGA ATCTCTATTA

101281 TGCATATAGC CCCATAGATA CATCAAGTAC TGAAAGGGGT TTTTAGAGCC CATAGAATAA

101341 TGAATTAGTA ATTGATCAGT GTTGGTACAT TCCTTGACGG AATCCCTCCA TTCGGAATAA

101401 GGTCTATTCT CTCATGAGTC AATCTCATCC CTTTGGGAGG AAACCCACTG AAGCGCATCG

101461 CTTTCACTCC TGAAAGACTT GTTTTGGAAG GCTGCAGCCG TCATATATGT ATCCCTTATT

101521 TCGTAAGGGT TTACGGAAAG AGATTTTCTT CTGAATGTTT GTTGATAAAA TATGCATGAC

101581 TGAGCCAAAG CTCACTTTAT GTCTCTCATA GAGAGATTGA CCCTCAACGA AGAACTTTCT

101641 TACTCTGTCA GCCACTTCAT TGATGTTAAT CTTCAGAAGG AAAGGAAAGA AGGCATGAGT

101701 AAACCCTTTT TAACCAAAAA ATCATCATTA TCAATGAGAA AGTTAAGAAA TGGATGATTA

101761 ATCTTAAAGG GTTGACCTTG CAGCTTGTTC ATTACACGAC AAAGATCCTT AGCCTTTTCA

101821 TGGCTTTTAG GGTCCCTACT TTTACCAAAA TAAAAAAATT TGTTACGTCA CCAGAACTTA

101881 ACAGGCGGTA ACGATCATAT ATCTCCTTTG TAGGAGCATT AAGGTACCCG CCGTATAGAT

101941 AACTGATGTT GAACCATTCT TTATCTTTTA CTTGAGAGTA ATCATAACTC CAATCCGTAG

102001 GGGGATATAC CATAGGTAGG TTGAGCTTCA TAGGAAGCAA AGTGGTATCA AATTTACATT

102061 CAACGTATAG AGGACGGGAA CGATAGAAAG ATTTTTTCTT CTTTTTGATT GGGTTCTTGT

102121 CTCCATAGGA GTCAACATCC TTTTGTTTTA GATCTATCAG ATCTCGTTCA AACATGAATT

102181 CAACTAAGGC GGTACCGAAG GGATAACGAA TCCCGTTCTT TGTACGCCTC TTGGTATGCG

102241 GAAGTAGCTA AAGAAGTCGG CCTAACCTTC ACCTTCGGTT CCCGTAACCA AGTTTTTTCT

102301 CACTTCTTAT GTACTTTTTC TTACTTCATC CATACTTTTT TCTTTTTTTT TAAGTGTAGG

102361 GCAAACGGGC GGGGGCTCTC TATTTGCTCT AAATGCCAGC AGCCTGGTGA GGGCTGACTG

102421 TCTGGGGACA GGTTAAGGCA GGGCCTGCTG GGCTTGCTTA TCATGAGATT GGGTAAGGGA

102481 ATCGTAAAGG GGCTCATAAA CCGGGCGGGC GAGCTTTTGG GCATACGGAA AGGGGGAAGT

102541 GGATGGAGAG TACTTCTAAG CTAGAGTTTA GAGTGAAGTC GCTATAGTGG CTAAAGTGAG

102601 TCTTATTACA CGGCTGGACG CCCGGCTCTA GACGAAGCTG CGGGGGTTAC CACCACATCC

102661 TCCCCCGATA GACTCGAAGC TCTTCAAACC TTCAACGGGA TAAGAAACTT GAGAAGATCA

102721 ACGAACCTGA GAGAAGGATC CAGAATCTAA TCTAAGGAAG CGACTGGAAG GAAAGCAACT

102781 GGGCTAGACT GCTGATCTTC TAGAGTAGTC TTATTTTTGG AAACAGACTG TAATCGCCGC

102841 CTGTTCCGGA TGACTGGAAG CCTCTGAGGT CAGCTGAACA GGCTGACAAT CGGCGGAAGA

102901 TGCTGGGTAA AGCTGCTGGC CTGAAGAGTG AGGCTGATCC ATAACATCAA CTGCAGAAGA

102961 ATGAAGTTCG AGTTGATGAA CAGGAGAAGG CCATAATACA TCTCCATCAC CATTCTCCTC

103021 CAGGGCTTCT TAATTAAGAA AAGGAAAATA TGAGGTGACC TCATTAAAGA GAACATTCAA

103081 GGATACATCG AGTCTCTTGG ATTTCACGTC ATAGCATCTA TCTATATTCG GACTGAGCAT

103141 ATCCAAAAAA GACACAAGTG CTTGCCTTGA GGACAATTTC TCTCTTAACT GCGCAAGAAT

103201 ATGAACAAAA CAAGTGCATC CAAACACTCG CAAATGCCTA TAGGATGGTG CTGCCCCAGT

103261 AATAAGTTCG TGAGGTGCCG CTGTAGCTTC TTTCCTCTCT CTTCTCCCCA AAAACAAAAA

103321 AAGGAAAAAG GAGAGAGATG TCCCGTCCTT TCTTTATGCA CATTCATATA CATAGCCAGA

103381 CACAAAGGTG TACAATCCGG TCAAAATCTG CGGTTCTTTA AGTGAATGAA CTCTAGGTTT

103441 TCTTACTTGC TCTAGTGGCT GGCAAAGGCC AACCGAGAGG GGAGAACGAA TGGCTCAGGA

103501 ATCGACCGGT TCCGAGCAGA TTCGTGGAAT TATTGTAGAA GAATTTTCTT ATCGTAAAAT

103561 AAATAAGAAG AGCCGTCTTA TCTTAGGAAA TGACTTCACT TAAAAGACGG ATTCCGCTGC

103621 TGCAAGGCGA GAGAGCAACT TGTCTGGTCT TGCGGTGCAC TCACTCCCGT TACAAGAATG

103681 AGATGAAGCT TTTTCTCGAC TCGAGACCAA TACCCCTTAC AACTCGCACC AATAGCGGCA

103741 CTGAGCGGCC GGAGATTGAT TGAAAAGCCA GCCCGCCTCT TTAGGATTGT GATAAAGAGC

103801 ACACACACGG GACCTGACCT ACTAATCATC ATCTCATGAC GCGCGAAGCA AAAAGAAAGG

103861 TCCCCCTTCC CGGCCCCCCC TAGCCACCTA CCTACTCGTG CTCGTAGCTC GATCGGAGGT

103921 CAAGAGTGTG GTCCGGCGGA AAAACAGAAG TCGTCCGTAT CAAGTGATAC GTGAATTGCT

103981 CAGTAGTGCT TCGCCACTAC CGTAGCTGGC GGAAATAGCT TAATGGTAGA GCATAGCCTT

104041 GCCAAGGCTG AGGTTGAGGG TTCAAGTCCC TCCTTCCGCT CCTGGCTTCG TCGTTTAGTG

104101 GTAAGGAGTT GAGTAGGCGG CGAGTAGAGT GCATAAGTTT GAGAGTTAGA GAGAGGCAAT

104161 GAAATTGAAG TGGGATGCGG AATGTGATTG GTGATGGATG GTGGTTATGA AATAGGTTCG

104221 GGATCATCTC GCATCGGTTC TGCATCAGAT GATGAGCCCA TGCGACAACT TTCTCTTTGA

104281 TTTTCGCTCG ATAGGTAGGC TATTAGATTG AGTCGAAAGC CTACCAAGGC ATAAAGGTTC

104341 TGATTTGAGC GAGAGCCCGA ACGGGGGACG CGAGAACATC TTGATCGAAA GCTCCACTGT

104401 TCTGAATAGT GAAAAAGACT TTTACAAATT CGATCAAATC GATCGAGAAT CTCATCATCT

104461 GTTAGGTGGG CTAACCGACC GACCGAGTTG GGCTGAGCGT CCATGTCACA GAACCTTTCT

104521 CTAGCCAAAA ATCCCATTTT TTATGGAATC GGAGCGGATC CAATTCATTG GCAAATGAGA

104581 AAGATACCGT TTTAACACTC AGAAAAAACC TAGAAAAAAA GTCACTAAGA CAAGAGCTAA

104641 GTAAGCAAGC AAGAAGGAGA GGCCAGAAAA GGCAAGGTTC AAGGACTGAA GTAGAGGCGA

104701 TAGACTCAGA GGCGTGGAGC TGAATAACGT TGTGAGACTC AGATTCTCAG ACTGGGTAAT

104761 AGCGATAGAC ACAGAGGCGT AGACGTCGAT AGACTCAGAT TCAAGGACTT CAGTTAAGGT

104821 CGGTAGACAC AGTTAGGAGA GCTTCATAAT GCCGATAGGA GCAGGTTCGA AGACCGAGCC

104881 TAGTATAGGC GACGGGGCGT TTGACTGGGT CTAACGACAC AGTGTCTTTA GAGCTTCATA

104941 ACGCCGATAG GCGAAGAGGC GCAGAGCTGA ATAACGTCGC CTTACGACTC AGTTTCAAAG

105001 ACTGGGGCAA CGCCGTTAGG TACAGGGGAG AAAGAAAAGT AGAGTATCTG CGCAGGCTCC

105061 TTGGAGACAA GTCTAGTATA GACGCAGGGT CGAAGAGACA AGTCTAGTAG AGACGCAGGG

105121 TCGAAGAGAC AAGTCTAGTA GAGACGCAGG GTCGAAGAGA CAAGTCTAGT AGAGACGCAG

105181 GGTCGAAGAG ACAAGTCTAG TATAGACGCA GGGTCGAAGA GACAAGTCTA GTATAGACGC

105241 CGGAGCGAAG CGACAATTAA AGCGGGTCGA AGACCCAAGT CTCGTAGAGA CGCCGGGGAG

105301 AAGAGCTGAC GGAGGATTGT GTCCACGATC TGGTAATCTA AGCTTTGCTT CTTCTGGTCG

105361 GCTCGTATTA GCCTGTGCTT TATTACAGCT ATCGCTATCT CGTTCTTTTA GTCTTTTTAA

105421 CGGTACTTGA ATCTTAAGTC GCGGTCATGT CTTGCCCTCC TCTAGTATAG TGACCGCTTT

105481 CATGTTTTCC CCGAACCGAA TTTCATCACT TCCAGGCTCA AGTGCCTCTT CATCCATCTT

105541 AATTCCAAAG GCGAGTCTCT CCTGACTGTA ACTGCTATGG TTTACAGTCA ATAGTTCTTA

105601 ATCAACTCTT TCTCTTTCTC GCCGAGCTTT CAAAAGTTTG AAGAGAAAAT AGGGGGTAAG

105661 GCAATGCAAT TGTATAAATT TGACTCGGAC TTTCTTTCTT CTCCTGCGGA GCTCTGAGAA

105721 AGTCACCGGT GGCAGGTTAG GAAAGTTCTC TTGCTGCTGA TTTGGCCCTG CGCTGATTCA

105781 GGAGCTTCTT CTTTAGTCTA GGTTATGAAA AAAAAGAAGA AAGGGGCGTA GCGCTTACTT

105841 AGTGCTTGCA TTAAGGGGTG GACGAGAACA AGAAGCGTTC GCCAACTTTG ATAGACATAG

105901 CATTTAGAGC AAATAGAGCA GAGAGCTTAC TGTTTGTTTC TATTAGAGTC GCGAGCTTGT

105961 TGTAGTCGGT CCTAAAGGGA GAATCTTGCT ACTTACTTGC TATATCCCCG CGTCCTTGCA

106021 CGGCTCGAAT TTCTTTTCGA AATCCCTGCT TTTCCCCTCC TCCTCCCCCC GTTCTATCGT

106081 CCAAAACAGG TCGTATATGG AGTATAGCCA AGTGGTAAGG CATCGGTTTT TGGTACCGGC

106141 ATGCAAAGGT TCGAATCCTT TTACTCCAGA TTATGAACAC CCGATCGGAT CTGTCAAGTC

106201 AAGAACGAGC TAGCTGACGA CTACAGGGGA AGCTTATTCC AAGCCAGAAA CCCGAGCCCA

106261 GCTTGTAGCA AGCCAAAAGT TTGACTTTTT TCGACTTTCT TTGCTAAGAG AAGAGAGAGA

106321 AAGGTTTGAA GAGCCCCATT ATGCGGCGGG GAAGATTTCG TTCTTTCGAT CTTTAACTCA

106381 AGTACACCCC AACCTAATCT CGACTCGGAA AGCGAAACCT GATCAATTCA CTAAGAAAGT

106441 GACAGCCTTT AACCAAAGAG GAAGTCTGCG GTCAAATCTG GTCAATTTAG AAATAGAAAT

106501 AGAAAGAGGG CCTGTGACCT CAATATTAGA AGAAGAATCT CTTTTCCCAA AAGAAGACTC

106561 ATAGCCGGTA TAGCCGTAAA GTAAACCGAG AATAGTCAGC TCGAAGTCAG CCCGCTTAGA

106621 CAGCGGTTAC ACTGGTGTTG TCTACAAGCA CATCGATGAC CCCATGTGGT TAACCTGTCT

106681 TTAGTAGTCA ACCTGTTCAA AAGAGCAAGC CAGACAATGA ACATGCTTTT AGGACTTGCC

106741 CTATTGTGAC ATACAATTCT CTTCCAGGGC ACAAGCTGTC CCTCAGGTCT CAAAGCAAGA

106801 TAGGCTTTCT TAGTTGAGAA TTTCTGTCTG ACAGTAAACT CATCCCGCCC TCCTTTGTGT

106861 TCAACCCAAT CACTAAGAGC AAAAATCTTC TTGACCATCC AAGAAGCTGA AGAAGGAAGA

106921 TGAACCTGAT TTATATGAGC TCTTTTGATG TAGTAACTGT GCACCCATCT CACCCACAGT

106981 GTATCCAACT TCATAGCAAT GGCCCAAACA AAGGAGTTTA ATGCTAGCAG CTCTGTTCCA

107041 ATGAGGAAGA CTAATAAGAT TCCACCCCCC TTGAGCTCTA GGAAAGCACA TTTGATCCCA

107101 AGCAACAGAA GCTTTCCTGG AAGGAGTGTC TTTACCTGTC CAAAGGAAAA GTCTAAAAAT

107161 CTTTTCAATT TCTCTGAGGA CTTTCTTAGG CAGTAAGAAA ATTTGGCACC AATAAGCCTG

107221 AATGCCAAAG ATCACAGCTC TGATTAGTTG AAGCCTGCCT GCATAACTCA AGAGCTTATG

107281 AGACCAGTTG GAGACCCTAG GTTGAACTTT TTCAAGTAGT GGTTTGCAAT TGTGAAAACT

107341 TAGCTTCCTA GAGGACAAAG GAACCCCAAG ATATCTGAAG GGTAATTGGC CTTTAGGAAT

107401 AGGGAGAAGC TCCTGAATAG CTTCCTGATC TTGAACAGAT AAACCACAAA AATAAATGCA

107461 ACTCTTAGCC TGGAGTCCAG AAACTGTAGA AAAATTAGAG AATTCCCTCA TCATGAAGCT

107521 CCATCCAATT TCCATTCTTT GTGTGCTATA CTCTTTATTC TCCTCATCCT TTTCCCTAAC

107581 CCGCATGGAA AGGAATTCCT TTCTATGCCC AGCTCTTGCA CCCCTACTTC TCCTCTTTCT

107641 TTTGCCCTCT TCTAGCTCTG CTATCCTGCA TTAATCATTA ATTATTTCAT TCCTTTTCCA

107701 CTTCTTCTTC TTTCAGCCTA ATCTTTCCTT CGCCGCCTAC AAATAAAGGC GGTCGATTGG

107761 TTAAGTCTTC GTTCTTCAAT TCTTTCGTAA GAGGCTTTTT AAGACAAAGT AGGTTCGGTT

107821 AGATTCTTTA GGTAAGAATC AGTGAGTCTT TTGAATTGGA GGGGCAGGCA CTTTCATCTC

107881 TTTTAGAACC CCGTGGGAAA CCGACACAAG TTAACCTGCG GGAAAGGAAA GGAAAAGCTC

107941 TCAATCGCAA TAGGCGCAGG AGATGAAGTT TAAGGTAAGC CGGCTTTGTT TGCTTCCTTC

108001 AGGTCTGGTG GATTGTGGTG TTATGACTAA TTCATATGAA TAAATAGCGT AATATAAAAG

108061 TGATGATATG ATGCCCAGGC TAGGAACTGC TGTCATTCAT AGTAGGGTGC TGTTCCCTCA

108121 GGGCAACTTG CTTGGACTGA CTTTTCTCTT TCGTGCCTAA GTGTAAGATT GAATAATCAT

108181 AATCAAGGCA ATAGCTATTG ATTCTTTGAG AACAAAATTG AGGTAGACAG GACTTGCTTA

108241 AACTTGAGTT CGCCATTGGC TATGAGGCAT GAACGATAAG ACGCTATGTT TCTTTCCTCC

108301 TTAGGATAGA TCCTATTTTA CATTATGTAT GAATCTAGCA TTGGCCTCTT ACCCGGACGA

108361 AGATGAGCGA TCTTACGTTT GCCATCATGA AGGAATTCTC CTTCAAAGGC TGTGGCGACC

108421 GATGGGTCCG ACCCACTTTT CATAATAATC GAGATCTTCA TTTGCAGCCT TGGTATTATA

108481 TGCTATATAA AGAGGCCGTA AAGTCCTCTT GACAAACATT ATACCAGGAC TGAAAATCCC

108541 TTCCATCGAG TGAATAAGGC TAATATTATG AGCAAGCAAA AGAAGCGATC TCGTATTTAA

108601 GAGAACTGAA TACGTTAGAC TCTGCCTTCA CTTCTAATAT TGACTTATTA CTGTTTGGAA

108661 GAGACTTCCA GGTAGGAATC CACCTTCATC CCTTTTCTAA TGGGATAGTG GAGATCCAAG

108721 GAAAGTCAAG TTTCAGGAAT TTCTCTTTCA GATTCTCAAT CTGAGGGAAT TCTGTCCTTA

108781 GTCAACATGG ATTCAATCAT CAACAAAAAG CCTACCCGCA GACAAACTGG TATAGATGGG

108841 TTCCCAGCAG AATTCTTCAA GAGCACACGG GGCACGTTCA GGGGTATGTA CTGCCATTAT

108901 GTATTTTTTA TCCTGGGAAA TTGACAGATT AATTGCAATC AGTTCCAAAA GTTGCCCACT

108961 TATGTCAAGG ATTTAAGGCC CATTGCTTGT TACTGTGTAC AAAATTCTAG CTAAAATCCT

109021 CACCTCCAGA AATTGGTTGT TGATCTGTTG GTCCTTCTCA ATCTGCATTT ATTGAGGGTA

109081 GGCTGTGGAC AATGTGATTC TTAGCCATGA ATTAGTCAAA GGCTAGGAAT GGTCTTTCTC

109141 CTAGATGCAT GCTCAAAACT GAAGAAAGCA TATGACTCAA TTGAATGGCC ATTTCTTGAT

109201 ATGGTTCTCC ATGAGTTAGG CTCACATGTT TGCTTTGGAC CTCTTGATGT GGAGGTGATG

109261 TTATCTCTGT GCAGCTACTC TATGATGCTT TCTGTCATTT TTCTACTGTC TCCGGGGCTA

109321 ATCTTGACAA CTTTGTACAG TGCTGATGCA GATTGAGAAG AATACTATGC TTGATGCTTT

109381 AGGGCTTTTC CTTTCACTGG GCTCTTTCTA CAAAGAGACT CCCGCAATGT AGGCCACTGA

109441 TTGAAAGTGG AAAGAATTAA GGACCTCTAG GTTCTTGTCC TATGGGGGGG GCTCGCCTCC

109501 TGTTGATAAA AAGTGGTTTG GAGTCAAAAT CTTCATACTC CCAAAGAAAG TCATTCATCT

109561 ATTGAAGGCG TAGAGTCTTT TTGTGGACTG GAAATGACTC CTTATCAAAG AGAGCCCTAA

109621 TCTCATGGGA AAGAGTATGC TGTCCTACTA GTGCAGGGTG TCTTGACCTG TGGAACAAGC

109681 ATTTGTAAAC ATCTCCGGGT CCTTGAGAAA AGACTGTGGC TGGGTCCATA CCTACTATCT

109741 GAAGCAGCAA GAAATTGACC AGGCTACAAT CCCAGTTGGG TCATCAGGAA AATCCTAAGT

109801 GCCAGGAAGT CTTTCCAGGA CTGATCTTTG CTTGAACTTA GCCCGAGTAA GGCCGACTTA

109861 AAAGAAAACT AGGTGCCAAG TCTTTATATG AAACCTTTTT TTCTCTCTAA GAATCATAGC

109921 CATAGCCTAC TTTCGTACCA AAGTTTAAGT CCTTCTGAGA TGGAGAGAAT GCCCTCCTAC

109981 TCTCTTTCAA TCGCCCGTGC TAAAACAAAG AGGGCCTAGA CCCGGTTGAG TCAGCAGCTA

110041 GTTTTGCCGG AATAGGAATA AACGATGCAA TTTCATCTGT TGGAGGAAGG GTAGATGGGA

110101 GCGATCCCAG ACCAAGGGAA GAAGGTATCT GATCACTGTA GTTCGAGACC CCTTAAACCA

110161 ACCAATTCCT GTACTGTACT CTTTTTGATC TCATCCGTAT TCCGATCGAG GAGAGGAAAA

110221 ATAGCCCAAA AGCCCACTGC TAAAGCACAG ATTCCACGCT CTCAAAAAAA GCATTTCCCG

110281 GGAATAAGTA ATGGGGCAGG TTAGTCTTAC TCGGCAATTC TCACTAGTGA TGGCCTACTG

110341 TACTACAACC CATTGAAAAG GCTTTTCTTG CTAAAGATAA TAGGCCATAT AGAAGAAGTA

110401 ATTACACCAC AACCCTCCTT ATTATTTAAG AATCAAACTA TATATGATAA TATTAACAAC

110461 GATAGAAATA GAATAAGTCT TGGCTCGCCT AATCCAATCT TGTTGTGCTT GATTATATGT

110521 TCTAAGGGGC TTAACTAGAA TAAAAAAGGC ATAGTAAGAA ATCTCCATTA GATAGGTGAA

110581 TGAGCAGACA CACAGCCTTT TGACTCCCGG AAGAACGAAA AAAATGAATT CATGCAATGA

110641 AGCAAGCCAT AAGTTCATAT GGTGTCGTGA GCTTAAGACC ACACCGAAGA AGAAGGGTGA

110701 GTTAAGGAGG AACAAGGTAA CCATATGGTT ATAATAGTTC TGGAGGTAAG TTAATAAAGG

110761 TGGAAAAAGC CAATCAATCT CAGTACTTGA GGATCTCGCC TCTTTCTCTT TTTAAAGAAA

110821 AGGCTTTCTA GTTGTTCCTA GTTAGGAATG AGGATGATAG GAGGGGCATC CTAAAAGCTA

110881 TTAGGCAAGA TGTACTATCT TAAACAGAAG TTATTTGTTC CTTGTTAGGA ATAACAATCC

110941 TACCCTTTAA CCTTAAGATC CCATGCTCCA CTGTATATCC CTTAGGTACA GGCTTACCCA

111001 TCTCTATATC ATGCTTCAAC TGTTGTATGA AAGTGTCCTG ATCAATGTGA ACTTTCAATC

111061 CTTCCCATGG TATGACACAT GAGGCAGGTT ACTCCTTATA GTCTCTATTC ACTCGAGAGA

111121 GAGCATCTGC CACCTTATTG GAGGTTCCAG ACTTGTATTG AATGTCAAAA GTGAACCCCA

111181 TCAACTTGCT TACCCACCTT TGGTATTCAT TGCCAACCTC CCTCTGCTCC ATGATGTATT

111241 TAAGGCTCTG TTGATCAGTT TTAATGACAA ATCTCCTCCC CAAAAGATAG TGCCTCCATT

111301 TGAGAACGGC TAGCACAATG GCCATCAATT CTTTTTCATA TATGGACTTT AGCCTAGCCC

111361 TCGGGCCCAA GGTCTGACTG AAATAAATAA GCTACTGGAT GGCCTTCCTG TAAGAGAACA

111421 GCCCCCAATC CGAAGCTAGA GGCATCTGTT TCCACTACGA ACAGCTTAGA AAAAGAAGGT

111481 AGGATCAGAG TAGGAGCGAA GAGTCATGGC TCTTTTCAGT TGTTCAAATG CTTGAGTAGC

111541 TTCATGAGTC CATCCATAGG CATCCTTCTT CAGTTGTTCC GTGAGAGGAA AAGCAATCCT

111601 TGCATAGTTT GCCACAAATC TTCTGTAGTA CCCTGTCAAC CCAAGGAATC CCCTTAGCTC

111661 TTTTAAATTG GATGGTGTAG GCCACTGTAA CATTGCTTGA ATCTTACTGT CATCCATAGA

111721 AACGCCTTCA ACAGAAATAA TGTGCCCCAG ATAAGCCACT TTTGTTTGCC CGAATTCACA

111781 CTTCTTGGCA TTGGCAAACA ACTTGTGTTC TTCCAAAGTG TTGAGAACTA AGGCCACATG

111841 TTCCGCATGC TCCGACTGAC ATTTGCTATA CACCAGAATA TCGTCAAAAA AGACTAAGAA

111901 AAACTTCCTC AAGAATGGCT TGAATACCTG ATTCATCAAA GCTTGAAAGA TTGCCGGGGC

111961 ATTGGTAAGG CCAAAAGTAC CATGAACTCA TAATGACCCT CATGGGTTCT AAATGCCGTT

112021 TTAGCTTCAT CTCCTTTCAT CATTCTAATC TGATGGTAGC CGGACTTTAA GTCCAACTTA

112081 GAAAATACCG CAGCACCATA TAATTCATCT AACAACTCAT CTATGACCGG GGTAGGGTAC

112141 TTGTCTGGTA CCGTGACCTT GTTCAATGCT CTGTAATCAA CACAAAACCT CCACGAACCG

112201 TCTTTTTTCT TGACAAGAAG CACGGGACTT GAAAAAGGGC TAGTGGAAGT TCTGAGAATT

112261 CCTGCTTCTA ACATGTCTTT AATCAAGCTC TCAATCTCAT CTTTTTGCAC TTGTGGATAC

112321 CTATATGGCC TCACACTAAC CGGATCTGTC CCTTCTTTCA GGTGAATAGC ATGCTCATGT

112381 CCCCTTATTG GAGGTAACCC CTTTGGCATC TCAAACACCC CTTGATGCTG TTGAATGGTG

112441 GGCAGTAACC ACTTTGGTGC AGTCACCTCT GCGGCAGCCA ACACTACTGT TTGTTCCTTC

112501 TCTACTTGCA AGTGATTCAG CTACACCAAA TATCCTCCAC CCTCCTTTAA CATGGTGCGT

112561 AGCATGGCGA AGCTCCATCT ATTGGAGCAA GGAAGGATCA CCCTGCAAGG TTTTGATGTC

112621 ATCACCCAAT TGGAAAACAA GGGTCTGTGT TTTCCAGTTA GCACTCATAG TGCCCAACTA

112681 ACTTTTCCAG CCCTTGCACC ACAAGCAACA CATCCTTGCA CTCTCCAAAT CCCTTCACTG

112741 GATCTCCTGT TCCCAAGGTT ACACCAAACT CCTTTGTGCT AACTACTGGT ATCCCGATCT

112801 TTTCCACCGT ACTCAAGGAG ATGAAATTGT GCGTGGCCCC TGGATCTACC ATTACCACCA

112861 CATCATGACC TAGCACACTG CCTTTCATCT TAAAAGTCTT CGGAGAAGTT AGCCCCAAAA

112921 CAGAATTCAG TGACACCTCT GATAACACCG GAGTGGTGGG GCTATCCAAC GGCTCCTCCT

112981 CCGTTGGAGA GTCAAGGCAA CCTTATGTAT CCTCCTCATC TCCTTATAGA GTAAGTAACA

113041 CACTCAACTC CTTCTTCCTA CACTTGTGCC CAATGGTCCA CTTGTCATCA CAACGAAAAC

113101 AGAGTCCCTT CTCTCTCTTG TGCTGATATT CCTTATCACT CAACCGCCTG ACTTCTCCGG

113161 TGACCTTAGT AGACGGAGCT ATGCCGGAAT TACCAGAAAC AGAGGAATAG TTGTTGACAG

113221 ATGGGGCAGA GTATTGAGAG GCAGCAGGGG AGTAAGCGTT TGATTTTGCA TAAGGAGAAA

113281 AAGAATGGGC AATTTACCCG GGTTGAAGTT GGGCCTGGCC CAGATCTAGT CTCAAAACGC

113341 TTCTGTGGCC CATATTTTTT CTTCTCTTCC ACCTTAACAG CTAGATCCAT GGCATGATCC

113401 AATGAATTCG GGTCAAGTAA CCTGACCTCA GCCTTGACAT CATCACGCAA CCCATTTATA

113461 AACTGACCCT TTGCAATCTC CTCCGCCACA CCTTCCAACG GAGCTAAGAG CTCGAGAAAT

113521 CGACGGCGAT ATTCAATTAC GCTTCCGGTC TGAGAGTGCC CCAACCACTG TTCATAAAGT

113581 TACCCCGTGC CGATGGTCCG GAATTGCCTC AACACCATTC CCTTAAGTTC CTCCCAACGC

113641 TTCACCGGAT GCCGGCGGGC GATTCACATA CTGAAACCAC GACAGGGCGT CGCCTTCAAA

113701 AGCCACCACC GCCGCTTCCA TTTTTTCCTC TTCCGACAGT ATGTAAAAAC TGAAATATCG

113761 CTCAGCTCGC AAAATCCAAC CATCCGGTTG TGACCCATCA AACAGAGGCA TATCAAGCTT

113821 CTTGAATCGC CAGTTAGAAC CTCCGCCGTG ATGCCCGTTG TTATAACCAC CAGATCCATC

113881 GCCAATCATA CTCCCTTCTC CAAATTGAAA GCACCCAGAA CTTGAGTAAG GCCCATCACG

113941 AGGTTTTGTT TTGGTGCTGT CTTCTCGCCG TTGAGCACGA CGCTAACCTC TGGTTGCTCA

114001 GTTGTTGGGA TCTGAGCCAC CTTTGGAATT GCACTTTGCA ATTGTACCTC TGATCGAAGC

114061 TTCCTCTGTG AATCCCTCAA CAGAGACATT GATGTTTCCT GGTTCTCTCT AAATCGATCC

114121 ATCCTTCCCT CCAACTTCTC ACTAAGAGAG AGAAATTGAG CTTTAGATTC TGCCGGCTAG

114181 AATTAGGTTT TTTTCAATTT TCGCTAACCG GGCGGGCAGC CCGCATACAT GAAGAGAAGA

114241 AGAGAGGGTA GTCGTAGATC AGATTCTCTC TAAGAGAATC GCAAGTCGAA GAAGGCCACA

114301 AGTTGAAGCA GCCAATGCTT TGGTCATTCA GTTGACTCCT TGCTGTCATG CTGGCAAAAG

114361 CAGGGGTTTC GGCCGGTTTT ACCTTTACCT ACTATTGGAT TTGAACCAAT GATTCTCGCC

114421 GTATGAAAGC GATACTCTAA CCGCTGAGTC AAGTAGGTCA AGCTGAGTCA AGTCAGAGAA

114481 AATAGACCCC TATAAGAGAA AGCCGCGGAA CCAGAGTTCC AATGCGCATA TTCGGAGAAT

114541 AAAGCGGATA GCGGAGCGCT AAGAAAGAGA AAACGTTCTC ACTATACGAA ATGAGACAGC

114601 GGCTAACACG CTAAGATCAG CCACTTAGGC AGGGAGAACC CAACACCAGT AGAAGTAGAC

114661 CCTGCCTAAA AGGCGGTGAG GGTATCTGAG TCAGCATAGC CAACAGCGCA GCCAGAAGCA

114721 CGAGTCACAT CATTAGTAGA TAGAGTTATT GATCCATGGC CAGTAGCGTG AAAGGCATAT

114781 CCTGTTACAG GTGAAGATCC AGATTGAGTG CTTGAAGGAG ATCCAGTTGA TCTGGCTTAT

114841 GTACCGGCAC CATTAATAGC TTATCCATCA TCGTCTTGTC CAACATTCCT TCCAGGTCGG

114901 TAGCCAGTAA CGGCACTAGC ACCTTTATAA AAATATCCCT AGAATCCGGA GGTTCTATCC

114961 TATACTCACT CTCTACCCTA CTCCTCTACC CTCACCCAAA ATCCACCGAA GTAAGCTTTA

115021 GCCATGGGAT CCAAGAGCTT GCGAGGTAGA GAGAGACCTT CCTTGCGAAG TAATAAGTTT

115081 AGACGAAGGT TCGAAAGACT GAGGCGATAG ACTCAGAGGC TGATGCGCTG AGCCGACAGG

115141 CGAAGTGGCG ATAGAGCTTC ATAATGCCGC TCAGATGAAA AGACTGTTGT AGAGTTGATA

115201 GACACAGGCA ATGAAATTGT TCAAGAAAGT CCATTACTGA GAGAAGTGGT GATCTCGTCT

115261 TGCTTCCTGG GAGAGAGGAA GCTTCTTCCC CACCTTTTTC AGCCAGATAG CGAGCAATCA

115321 CTTAGCAATG AACACTAACT GAAAGCGGCC GAGAATGAGT ACCTATCCCT TACGGGAATC

115381 GAACCCGTGT CTTCGACATG AAAAGACGAT GTCCTAACCA CTGAACGAAA GGGACCAAAA

115441 AGCCATTCTT CATATACCTC AGCTCCGAGA ATAGAAGTGG TTCGTTTTGT TTCTATACGC

115501 AATTAAAGAT TTCGTTTGTG TTCATGTTGG CGATTTCTGA TGTGAATTCG GCCTCACGTA

115561 GCTCGCCTTC CTACGGGTTC CCTTACCGAT CTAGTGACAC ACCAACCACG CCCCTTCCCT

115621 TTCTCCGATC ATAAAGCCTT CTGATCTCTA TATTTGTCTT TCATCTTCCC TTCATAACCC

115681 CGTTCTTTCT AATTCAAAAA TGAAATGTCT GTTTATGGAT GAAGTAATCG GGATGACAAA

115741 TGGTTACGAT TGCGAAAACC GGAGAAAGTC GGGAACCATC GATTACCTTT TGAATCAAAG

115801 TAGCAACGAG CCGAGTACTA CGACTACAGG GGGAGGAGCT TCGTAGACAG CCCTCGTCGC

115861 TTCTTTCCGG CGACTAGCTT CTAAAGTGGG TGGCTTGGTA AGCAAGCTAC CTTCAGCATT

115921 GGTCAAATCC CTATCAATAA TAGGCCGGAA TGGTGAGGAA GGAGGCCCTC CCTACTTCAA

115981 TGGAAAGGGG GGGATCGCCC TTTCACATCC GCTCCTCTAA AACTACCTTT TGCCCAACAT

116041 GATCACGAAC GAAGAAAGAA AATAGCGTAG ATAGGAGGAG GAAACGAACC AACCCGCTTG

116101 TCCTGATCGG AACGATTGAA GAAAGAAAGA GAATGGCGGC CCCTTCCGTC CAGGGGACAT

116161 CGTCGGAGAA CAATGTCTGG GACAGGGTGA GAACCTTCCG TTGGTTACGC CCTCTAAGTG

116221 TTGGTTCTTC TATATTTAGA TTCTGCTTTC AAGATCTATA TCTATGAACA AGAGAGACCC

116281 CTAAATATAT CCATTTGAAA AAAGAGATGA ATAGATAGGG CGGAGCCACC TGAAGGAAGA

116341 GATCGACGAT CCCCTGCAAT CTTTCTAAAG CAAGAAGCGA GAAACTTGAC TTTGAGAAAG

116401 AAGGGCATTC TATTAGAAAG TAAAGGCTCC TTTTATACTA TCTATAGCGA TCCGGCTACC

116461 CTTTCTTGTT CGTTAGCGCC CTCGCCCTAT TCTATTTGTT TAGTCATAAA GGAAAGTGGA

116521 CTTTCGCCTT TTGACAATCT TACTGACTGA AAGGGGTATC CGCTCAAACA TGCGAAGAAC

116581 GTCCGAGACG CCTTATATTA TAGAAATAGA AAGGCGCTTT GAGCGGGCTT CTCCAAATCA

116641 AATCTCCTAT AAAATCAAAA AGCAGGGGCT TCAAAGCGTG TAGTTTAGGG GTGCGCTTCT

116701 TCCAGAACCT AGACTTTGTT CTGCAAGAAT GGCTTTCTCT GATAGAGGCT CGCTTCGCTT

116761 TTTTTTGTTG CGGAGCTTGC TGCTTTTCAT TTGGATAGGA TAGGAGTAGG TGCTTGCTGC

116821 TCGCTCGCTT TCTACTAAAT GAGCCTTCAC TGCCCGCCTG CCCCCTCCCT ATCTTGACTT

116881 GAATCTTAAG TCAAGTCAAG TAAAATGAAT GAAGTGAACA GCCCAACCTT TGAAGCTTTG

116941 CCAGGCAATC GGTATCGATT GTTGAAGCCA GCCAAGGCTG ACACCTAATT CCAAAACACA

117001 ACAATAGACT TATAGTATAG GAAAAAGCTT CTCTTTGATA GCGGTCATAG GGGTTGGTTC

117061 TGAAAGGATC TGACCGTAGA TAGAGACTGA AACCCGTTCG GTCGGGGGTA AGGGCGGATG

117121 TAGCCAAGTG GATCAAGGCA GTGGATTGTG AATCCACCAC GCGCGGGTTC AATCCCCGTC

117181 GTTCGCCCAT CAATAAATGG ACCATTTGTT ACGAAGACAC AAAGCAAACC TAGAAAGCAT

117241 TTTTTAAGCA AGCAAGTCAT CTCGAGGCTT TCAAACGCAT CCAAGCAATT GGTATCCGAT

117301 TCAAACATAG AACCCAATCG CCTTGCCTAC TTGCTGTTTG CACAAACAAA TAGAATGAAT

117361 GGCTGATCAT GAATTCTATT CAGTTTTGAA GACCCCACTA ATCAGCCTTA CTTAACTTAG

117421 TGAAAAATGA ATGAACCCCC GGATGAAGAG AAAATCTCCC CTCCCTTTGA CTAAAGGGGA

117481 GCCCCTATAG ACGTAAAGAC TTGACTTCAC TGTGTGAGAA ATAATGAGCG GCTCTACCCA

117541 ACCTGGCACT GTATTTCTAA TAAGAAATGA GGGTGACAAC CTAGTTACAG AAATACCCTT

117601 AGGTATTACA CTATTACACC CCCTCAATCT GTGCAGGGGA AACCACGTGC AGATTGGCTT

117661 TCCAAAATTC AAAACGTTGA CTATAAAGAG CCTTGCCTTA GTCAAAATAT CTGCTAATTG

117721 AAGCTGAGTA GGAACATATC GAACTAGAAG ATCCCCATGA GCAACACGCT CACGAACAAA

117781 ATGATAATCA ATGTTAATAT GTTTACTGCG ACCATGTTGA ACTGGATTAA TCGTTAAGTA

117841 AGTAGCAGAA ACATTCTCAC ACATCAATCA GCTTAACAGG ATGGCGAATG ACCAAACCAA

117901 GTTCCGCCAG TAGGGATCGA ATGTGAAGAG TATCAGAGAC AGTATAGGCT ACAGCTCGGT

117961 ACTAAGCTTC TGTGGAATAC TTAGATACTG TAGGTTGTTT CTTCGAGCGC CGGGAAATGA

118021 GATTGTCACC GAGGAAGATA GCATAACCAG AGGTAGAGCG ACAACTATCA GGACAGCCAG

118081 CCCAATCCGC ATCCGAATAG GCAATGATGA TGGTGACATC TTTCGACGGA CGAAGCCAAA

118141 GGCCATGATC AACTGTTCCA ATCAAGTACC TGTAGATGCG CTTAACAGCA GACAAGTGAG

118201 TAGTACGGGG AGCATGCATA AATTGGGATA CTAAATGTAC AGCATAAGTA AGATCAGGAC

118261 GAGTCATAGT CAAGTACTGT AAAGCTCCTA CCGTACTCCT GTACTCGGAC GGATCCGCAA

118321 GAAGTTCACC ATCAGTCAAA GAAAGAGTGG TCCTAGACGG AAGAGGGGTA CGCACAGATT

118381 TCGCAGTGTG TAAATGAAAT TTATGGATTC AATCATGAAT GTATTTTTGT TGCGATAAAA

118441 AGAACCCGTT GGACGTGCGT ACCACCTGGA TGCCAAGGAA ATAATGAAGA TCCCCCAACC

118501 AAGTCCTTCA TAGCAAACTG GGTGGCAAGA AGAGAAAGAA ATCGATGTAC TAAATGGGAG

118561 GAATTGCCAG TAATAATAAT GTCATCGACA TATAGAAGTA GATACAAGAA ATCCTTGCCA

118621 CGACGAAAAA GAAACATAGA TGTATCAGCT TGACAACAAA AGAAGCCCTG GTGTAAGAGA

118681 AAACTACTAA AACGATGAAA CCAAGCTCTA GGTGCTTGTT TAAGACCATA TATAGCCTTA

118741 CGAAGGCGAC AAATATGAGT TGGATATCGG GGATGAGCAA AACCTGGAGG TTGTTTCATG

118801 TAGACCTCTT CAGTGAGAAA ACCATGTAGA AACGCATTTT GAACGTCCAA TTGTCTAAAT

118861 GACCCACCCA TAAGATATTG CAAGAGAAAG GACTAGACGA ATAGTGGTAG GTTTGACAAC

118921 AGGGCTAAAA GTCTCATCAT AATCTATACC TTCCTGTTGG TTATTCCCTT GGGCCACTAA

118981 CCTAGCCTTT TTCCGCTCAA CAGTCCCATC AGAATTGTAC TTTGTTTTAT AAATCCACTT

119041 TGAACCAACC ACATTCTTAG CCGTAGACGC AGGTTCGAAG TAATAGTATA GACTAGGGGC

119101 GATAGAGTCG TTAGACACAG TGTCTTTAGA GCTTCATAAT GCCGATAGGA GCAGGTTCGA

119161 AGATCAAGCC TAGTCTATAT AGGCGACGGG GCGGTTGACT GGGTTGATAG ACGAAGTGGC

119221 GGAGCTCCAA ATAACGTTGA TAGACGCCGG GTCGAAGACC CAAGTCTAGT AGAGACGCCG

119281 GATCGAAGAG CGACGTTTAG AGACGGCGGG AGCGAAGCTT CAAGTCTATC TAGTATAGAC

119341 GCCGGTTTGA AGTAATAGTG TATGCGTCGG TTTGAAGATC GACGTATAGT ATATGCGTCG

119401 GAGAGATCTT TTCTTGTCTT TTTTGTAAAT CATACGACCC ACGGGGCGGT AATAGAAGAT

119461 GCAGCTCAGA CGCGCGTTTT AGGTTGTATC TGTTATAAAC TTAACACCGT ATTATGATTA

119521 TGTGGATCTG AGATACTTCC TTGCGCTTTC TTTTTAAGTT CTTAATTTCG GGTGGGATAG

119581 AAGTTGGGGT AGTTCAATCA TCATCTATTG CCCGAAGGCT TACTATTCAG ACTAATTCGT

119641 TGGTAAGCCT ATGTCCTATT GCCCCCGGGG GGGGGCTATG GTTCAAGCAG TCAATTGCAG

119701 TCTTAGAACT TGAGATGAGA GTGAGCTAGT AAGACTTTTA GGAAGAAAGA TCCTAGATTC

119761 AGAAATTATG GTATTTTCAA GCTATTTTCG GTGTGTTCCT TACCAACACG CGCTCTATAT

119821 TCCTTCCATT TTTGATAGAT TTCATGCCTA TTCACAGGAA GGAGTCGTAT TCTTACTAAC

119881 TATAGTTAGA TAGTACTAAA CCAAAGCATG CAATAGTGAA AAAAAGTCTT TAAGACAAGA

119941 ACCCAGGAAT TGATTGATTC GAGATCCCTG TTCCAAAGAA AAAGTGCTAC CTATAGTTCA

120001 TTATAAGTAG ACAGTTACTT ACTGACTTAG AGTGATAATA CTCTTTATAT GGCACTTATC

120061 CCAGAATACC AAACCTGATT CGGAAACTCC AACTGATTGA CTTCCTTTCA ACTACAACTG

120121 ATTCTGAGAC TAAACCAGAG AATAGAATGA AGAAAGCTGT TAATTCCCAA AAGCTTCTAA

120181 TAAGCGACTC GCTAGACTAG CTAAAAATGA AGATAGATAA AGCAGGCTGT AGGTTTCTAT

120241 TACGAAACTT CAATTGCAGT GACTTGACTG CTATAAGCAC TAAGCAAGAG TTTGACCTTA

120301 ACGAGACTAA CGAGTGAAAC AAGCATAAGG ATGAGGCGAA GCCGGTTTCT TGGTAAAATA

120361 CCCGACTTTG ATCAAAAAGG CATTGTTTCA CAGTATGGCA GAGTTGGACT TTCTTATTTT

120421 ACGAGTTTTT ATAACCCTGG GTTTCAGCTA TTATGAAACA ACTCTTCCTG ATTAGCTACT

120481 ATTCCTATGC TGTTTATATA CCTCCTATTC TTCCTACTCC TATCTTACTT GTTCCTTTAA

120541 CTACTTTATA AGCCGTATTC TTATCTTTTT CTTACTGCAT ATATTTGTTA TATGCTGCTA

120601 TATTCCTCAT TCAGCTCATA TAGGGTTCAA GGAAGAATAC AGGAGACTTC CTAACTACGG

120661 TTACAGGCCT ATCTAGAGGC CAGACATCCA GCAGGGAAAT GCTGCGACTG AACTCATTAG

120721 GACTAAGGAA GTAATGAACT AACATACTAA TGAATGCAGC TCTTCCGATA CCACGGACAT

120781 GTTGCTACCT GCCGGATCTG CTTGACTTGA GTGAGAGCTC TCTATAAAAG AGCTCGGACG

120841 ATTAAGACCT ACTTCGACTG AAAGAGTCTA CTTGATTGTA GTTCCTGCTG TTAAAGAGAA

120901 AACTAGTTAA CCAAACCCTT TCTTGTTCTC TTGTTCCCTA TCTTACTGAT TATCATACCC

120961 CTAACCCTGA CCCTTGAGAG TGCTGATAAA ATCCCCTATA GAGTGCCTGC TAAAGAAAGA

121021 AGATCGGTTG CTCTTATCTT CTTATTTGTG CTAGACTCGT TTTCGCTACT TCTTATTCCT

121081 GTCTTAATAG GTGCTTTAAC TACTTACTGT TTTATAGCTC TATTCTTACT GCAGCTACTG

121141 TTTCTCTGTA GCTACATTCC TCTTATAGCT CCTTTAGCTA ATTCCAATAC ACCATACCAA

121201 TAATAAGATG CATATAGGGG AATGACGTTT CTAATTACTA ATCTACGCGT CTTTATACCC

121261 CGATTTAAGA ATATCATAAC CAGTTGTTCC TTTTGTTATT GGAGGAAGAG CTCGACCGGA

121321 GCTAACAACA TAGTTATTTA ACTAAAGCGG AAAAGATATA TCTGTTAGTA ACGAAGAAAG

121381 TGCTAATCTC GCAGTCAACT GTTAAGAAGC GGGGGAGAGA GGTGTAAATC ATGAATCAGC

121441 AAGCCTTCCA ACAAAGGATT TCTCCTCGGC CGCTAATAAA ATCCAGTCGC TATCTGAATG

121501 ACTAAACATT CTCGTTGGGT AAGTATCAAC CGATGGAACG GGGTCTCCCT GTGCTTCAGA

121561 TAGGGACAGA GCTCGAAACT CCCCTTCGAA TGATTGCTAA TCCTCTTTGA TTCTTTCTTC

121621 GGCTCAATAG CCCAGATATT CAAAAACCTT GGGATTGAGG TCCAGTTGGT TGGAGTTCTA

121681 AGGGCATCAT CTATAAAAAT TGACTTTCCT GGGGGCGGGG CCCCTCATTA CTATGAATAC

121741 TAACGCTCTA ACAATCTCCA AGCCCAGGCT ATTCTTACCT CTTTCGTTCC ATGTCGGCCC

121801 AGACCAGTTG TTTCCTCGCA GGTGGTATCT TATCGCAGCG AGCTAATGGC AATCTGTTTT

121861 CAAGCCTGCA GAGTAAAGGG ATTCTAATCT AGCTGCTTTT AAAGAAGCAG GGGAAATAAG

121921 AGCTAGGGCT AGAAAATTTA GATTGTATTC TGCGAGGTTC CATACGAGCG CAAGAGAATA

121981 GGTGGTTTCC ATAGGGTGCA TCCATTTTAG GTAAGTAATA GTGTATTTAC CTATGAAGTA

122041 ATCCAGTGAT CAAGCCTTTG AGTTATCCTG TTTTGGTTTT GGAAAGCAAA TCACAATCAG

122101 ATCGGTTAAG ATAGTTTGAA AGCATTCTAT TCTATGAGTT TTAGTGATGA GGATTTATGT

122161 TATGACTTTT TTTAGTGAAA TGGGGCTTTC GAGCCGTTTG AGTAGTCAGC AAGCAAGCAG

122221 TACCGTCAAC GATCCATCAA CGGAGAAATG AAGAAGCATC ATCCACGGAA AAAGAGAAAG

122281 GATTAGCGGT AGTGCCCCAC ACCCGTGATG CGCTTCCTTG CTTTCAGGTA TATTCCCGGG

122341 TTTTCTCTCT TGTTTAGTGT TTTACACTCT TTCCTCTCAA ACGGCGAGCG AGGCCTTAGC

122401 TGCATTTGTC CCATCCCAGA GTGAAACTCC CTAACCTGAG GAGCGGATAA GGTCTTTCTC

122461 CATTTGATGC TGGAGGAGTG CGTGCGAGAC TTCCGGATGC GGAAATCCCG CGATAGCTGC

122521 TTCTTTCATT TCTTCTTCCC TGAGTTCCCC TGTCCCTTAC CTCCACTGGC CATTAAACCA

122581 ACAGCCCGAC TATCTGTACC TGTACCAGCC GCCTTATGGC GCAACTCTTT AGAATGAAGC

122641 GACGGTCTTA CTTCTTCCAG AGACACAGTA TCTTTACCAA CAATAAAAGA TTGCACAAAA

122701 TTCTCATATG AAGACGGTAA AGACACTAAC AGAATCAGAG CGGCATCCTC ATCTTCTACT

122761 TTAAACATCA ATATTACGCA ATTCTAAGAT TTAATTGATC TAAGTGTTCT CGAGAAGGTT

122821 TCTGACTTCT GCGGTTGCTC ATTGTAATGC TCCTCTCATT GTTGGCGGGG ATTTGAACAC

122881 TGTGTTGGAT ACTGAGGACA GATTGCATGG GCATCCAGTT TCTCAGAGTG AGATATATGA

122941 CTTTGACAAT TGTTTACATG AGAATGAGCT CACTGAGATT AGAGCTGTTG GAGGTTATTC

123001 TACATGGTGT AATAATCAGG AAGGTGAGGA TAGAATTTCT TCTAAGATTG ATAGAGTCAC

123061 TGCTAACTCA GCCTGGTTCC AACTGTTCCC TAATGTTATT GTGGAAGTGC AAGAGAAAGG

123121 TGTATCTGAT CATTGTCCTC TCTTGTTGGA CTTTGGAGGT TATGATGTTA AAAGAAAGAC

123181 TCCTTTCAGG TTTCTCAATG TTTTGGCTGG CCATGATCAG TTTTTGGGGT TGGTGACTCA

123241 GACCTGGACT TCTCTGTGCC ATTCTGACCC TTTGTTGGAT ATATGGCTCA AACTCAAGCG

123301 GACCTCTAAA GGAGCTGAAT ACTACTCACT TTGTTAGGAC CAAAGGGTGG AATCATTGAG

123361 GGAGAAGCTT CAGCAAGTCC AAAATCAGTT ACATAGGGAT CCTTTGAATG CTGCTCTCAT

123421 AGGTCAGGAA AAGATTGTGT TGGCTGATCT TAAGAAATGG AGTGATTTTG AGGAGAAGAT

123481 TGGGCACCAG AAAGATAGGG TTGACTGGAT TAAACTGGGA GACTCTAACA TCAAGTTCTT

123541 TCATGCTTAT GCTAAAGAAA GGACTTCTCA GAAGGCTATC AAATTGCTCC TGAGGCAAGA

123601 TGGAACCAGG AACAGGTCAA GCAGTAGGTC TTGCTCTTTT ACCAGGGGCT TATGGGATCT

123661 GCTGCCTCCT CTTTACCAAT GGTGGACAGA TCTATTGTTC TGAGGGGACC ACTTTTGTCT

123721 CATCATGATC AGGAGCTCCT GTGTTCCTCT TTTTCTGCTA AAGAGATTAC TGATGCTTTG

123781 TTTAGCATGG ACTCATGCAA GGCTCCAGGT TTGGATGGGT ACAATGTTGA CTTCTTCAAG

123841 AAGGTGTGGG TGGGTTCTAG TGTCATTAAT GCTGTTCAGA GTTTCTTCCT CACTGGTAAC

123901 TAAAAAGCTA AATTTAACTT ATGTTACTTT GATTCCTAAA ACTGAGAATG CTTGTAGGGT

123961 GAAAGAGTTT AGGCCAATTG CATGTTGTTC TGTTCTTTAT AAGATTCTTT CTAAAGTCTT

124021 AGCAAATAGA ATGCAATCTG TGTTGAGTAG TGTCATTGGA GATTGCCAAT CTGCATTTGT

124081 GAAAGGGAGA GTGATTTTTG ATAACATTAT CTTGAGTCAT GAGCTGGTTA AAGGTTATGG

124141 AAGAAAGAAT ATCTCCCCCA GGTGTATGAT CAAGATTGAT AAAAGGCTTA TGACTCTGTG

124201 GAGTGGCCTT TTGTGAAGTT CCTTATGTTA GAGATGGGTT TTCCCTACCA GTTTGTAACT

124261 TGGATTATGG CTTGTCTTAC TACTGTCTCC TACTCTTTTA ATGTAAATGG GGAGCTCACT

124321 ATCCCTTTTG CTGGTAGGAA AGGTCTTAGA CAGGGAGACC CTATCTCTCC CTATCTTTTT

124381 GTGATTTGTA TGGAGTATCT CAATAGATGT TTAAGCCTTC TCCATGAGGA TCATGACTTC

124441 AATTTCCATC CGAGATGCAA TAAAATCAAG TTGACTCATA TGTGCTTTGC GGATGACCTT

124501 CTTCTTTTTG CAAGAGGGGA TGTTTCTTCA ATAAGGCAAT TGTATTCTGC TTTTCAGTTG

124561 TTCACTACTG CTTCTGGTCT TAAAGCTAAT TTGAGCAAAA GTTCTCTTTA TTTTGGTGGT

124621 GTGAATTCTG AGATTCAGAG TGCTATTTTA GAAGAGTTTC AGTTTACTAA AGGGGATTTG

124681 CCTTTCAAAT TCCTTGGGGT TCCTCTTTCT GATAAGAAGC TCTCTACAAT TCAATTCCAG

124741 CCCTTGGTGA AGAAGATTTT AGACAGAATT AACAGTTGGA CTTCAAAATT GTTGTCTTAT

124801 GCTGGTAGAG TCCAATTGAT TAAGTCTGTT TTGTTTAGTA TTCAAACTTA TTGGTGCCAA

124861 GTCTTCCTCC TCCCTCAGAA AAGAATAAAA ATGATCCAAG CTGCGCTAAG TTTAGCATTA

124921 TTGAACGGGA AAGGCTATAT CCAATGTCAG GGAAGAACCA GACGAAGGGA AGAGAGCACT

124981 AAGAGTCAAT CAAAGGGGTG GGGGAGATAG ATGAAGAAAG TTCTTTCAGA GCAGGAGCAG

125041 GGCGGAGAGA GCTCAGTGGG GAAAGAAGGG CAGGGCAGCT AATTGAATAA GCGTTAGAGC

125101 CGATGGAGGG CACGGGAATC ACGCTTTAGC CGAAAAGCGC TTACTTGCTT CAAGACTGAT

125161 TAGTGTGCGC TAGCAGGGGA GGGGATGCGC CTCGCGTATA GGCTCGCTTG AAAGCCCGTG

125221 AAAGGGTGAA GATTGGGGCA TTCCTGCTTT CCGCCTTTAT TGACTGTTAC ACTTTCTTAA

125281 ACTACCAATT CGGTGATATC AGTCTGAGAA GTATGTTCTT ATCATACGAG ATTCTAATTG

125341 AGCTTGTAGG AATGAGAAAA GAAGCATGAA ATGCCAAGTT TTGTCGCCTC ATTGTACTAG

125401 AGGCCCTTCT CACCGAAGTC TTTCCCACGA TTTTCATTAT CTTAGAGTCG ACTCCTTTTG

125461 CTTTTTCTTA CCTACCATCA GTTAGCTTCG GATCGCGCTT GACTTTGCTA TCAGCCACGG

125521 TAGGCTTTTT AGAAAGCACT GTTCTGCTTT GGCAATCAGG TAAGACCGAA TGGGGACGGT

125581 AAACTGCAAA CTTTTCCAGT ATTCGTTGCT CGGTTGGCTG GAATCTCGCA CAACAACAAA

125641 ACGGAAACGC CCCTATAGAC CTCTCTGACA ATAGTTTCGT AGCCCGAGAA AAGTGCTGCG

125701 AAGCGCAAGA ACGTATCGAT AGCTAAACCT TAAGAAAAGC ATCAAGTTTT CTTTTCTCTT

125761 CAAGAGAGAA ATACCTTTCC TGTTTGTTGA TAGAAGAAGG GTAGCCAAAA AGGCGAAGTC

125821 TGGTACTGGA TCATCGGTTT TTCTATTTAT ATAAGAGTCA GACTCCATAT CAAAAGAACC

125881 GAATAAAGTT TCATCCTTCA GGGAGTGGAG TGGGCCTCGG CTTACGAAAG TGGTTGCTAT

125941 GGTAGCAAGT TCGACAACAG ACATCGCTTT TCTGCTTTTT TAATGGGTAT CCCTGAAAGG

126001 AAGGCCCGAA GAAAAGGGAT CCGGAAAGTC CAATCCAATG ACGGTGTTGG AAAGCAAGTC

126061 AGAATAGGCT CTCGCTTGAG CAGGACAAAG GCTATAGAAG GTGTTCGGAG TTGGCTTAAC

126121 GAATTGTGAT AGAATCCGAT TTGAAAGCAG CTTTTCCTTA CCCAATGTTG CTCCCCGATG

126181 GAAGTGGGCA TCTAAGGAAA GGGATGATGG CATTGCCCGG TAAACCTTCT TTAGCCAAAG

126241 AGATCCTAAA TTTGAATTAG CGAAGCTTAG AGAGTGGAGT TGAAACTGAC GTGGGGACCT

126301 ACTTTAGGCA TTTCTTTTTC CCACGCCACG TTTTGAACGG GTTCTTGAAC AGCCATGTCA

126361 TTCCTTGGAA CGTGAAAGCT TGTTAATCCA CTGATTGGTG ATGAAAGATA GAACTCATAG

126421 GCACCTACTG CCCTGATTTT TGTTGTTCAC GGAACTTATA TGAGCGGGTA GATCTCTACA

126481 ACTACTATAC ATACATGATT TATTTCGCCC GGCCTTTTCT TTTGTGCCGA GACCTTGGTT

126541 GAGACTGTTT GATTCGCCAA CCTTAGCAAA TAAGAGGCAA TCCTTCGATT TCGACGAATC

126601 TGCACTTGGC CTGAAAGTCC CATCCCTAGG ACCTGTAGAA CAATCAAGCT TCGGCACAGG

126661 ATCTTAGGAC AGAGAGGTTA GCGGTAGGGG TCTTTCCTCT CCGTTACCTT GTTGGGTCAA

126721 CGGGGGATCA TTTTCTAAGA TTTCCATTTG CGTTGTGACC TCTTTTCTGC CCTAAGAGCG

126781 AGATGAAATG GGATTTTTTG CATCTCGTAT AGGGCCAAAA CCTAGTGAAT CTCCGAGTGA

126841 AGCTCGTTTT CAATATCTTT CTATCACGCC TATAGGCAAA AACCACTAAA AAGCGGATTC

126901 CCATACTAGA CCTAAGAGCC CTTGAATTAT ACGGAGAAAA GATTGGCATT ACTGCTCGCT

126961 TCATCCCTTT TGGTTGAAGC TTTCCCAAGC CATCCGTCAA CAATCAATCC CGAGGTTGGT

127021 TACCAGCCGG CAGAACTGAG CTCAACAGGC TGAGCTCAGA GGCTAAAAAC ACCTAGGAAA

127081 CAGACTGTCC TAGTAACCTA TCAAACCATG CTCTATTCCT AGCACTAGCT TTTTTAGGCA

127141 TAACATACAC AATTCTATGA TACAGCTCTC CTATCATTCT ATGGATTGCT TTCTCTGGTC

127201 TAGTCACTTT GTGCGTGCTC CCAAATAGCT AAGTTTCTCT GACTCCAAAT GGTGTACAGA

127261 AGCCCTGTAT AGCAGCTCTG CACTATCATT CTTTGAAATC TTCACAGACC CTAGGCTTGT

127321 ATTGCAATTT TCAAGACTGG AGGTATTGAT CTGCAGTTTC AGAATTTTAT GCAGGCTCTC

127381 ACAACACTGA GAAGAATAGT GACAATCAAA AAACAAACGT TCCACTGTCT CTGGGGCCTG

127441 TAAGCACAAA GGGCAGGTGT CATCAGTGAT CACTCCAAGT TGCACCAGCT TAGCCCTCAC

127501 CCATTCATGG ATCTCTTTAC CTTTCTATAA ATTTATTCTT TGTTGTTAGT GCTTCGTCGC

127561 TTTCTGAAGA AGAGGAGAGG GTCTATGTAA TTTACCAAGA CTGGCGAGAT AAGATAGGAC

127621 TCCTGACTCT TAAAAAGGGA GGATTCCCGG GTTTCTTTTT TTTTGGTAAA TGAAACTTTT

127681 ATTATCAAAA GGAGAACAAA CAATACAAAC ACCAATCACC AAAATTACAC CACACCTAAC

127741 CAAGTTGCAA AAGCATCACA ATGAGACTCA AGCCACCTTC TAGTAAGGGT TCAAGAGTCC

127801 CATCCATCAT ATGCAGCAAC AAGGCAAACA AAACTACCAA ATATTAAGCA TACAAAACAG

127861 TTCTTAAGGC CTCATCACAT CTACAAGACA CTTTGAAAAG AATTTCCCTA AGCAGCTGAT

127921 CAGTGGACTT GCAAATACCA CCAAACACAA TAGCATTCCT TTGAAGCCAT ATTGCATGAA

127981 TAGCCTCAGA AAAACACATC ACAACCAATC TACTTCTGGC ATCAGTTCTT CTGCACCTCT

128041 GAGAAATCCA CCTAACTTCC TCATCCCAAA CCTGAACCTG CTTCAAAATC TGAAGTTGCT

128101 TCAGTAGGCC CTGCCACACA GCATTAGAGT AATCACAACA GAAAAACAAA TGTTGAGCAG

128161 TTTCAGGTGC TTTGTTACAT AAAACACATA AAGGATCACA ATGTAGATTC CAAAGAAGCA

128221 TCCTGTCTTT AGTAGTAAGC CTATTCTGCA CAGCTAGCCA GGTGATAAAA ACACTCCTAG

128281 GACTTGCAGA GTTGTTGCAG ATTAACCTCT TCCAATTCAC CTTAGGAACT GCAGGCCTTA

128341 AACACTGATA CATCTTAGAT ATGCTGTATC TGGACCCCTT CACAACTGAG TTCCAACCAC

128401 CAATAGCATC CACTACAGTT CTATAGTTCA AGACTTTCTT AAGCATCCAG GAACAGTTTG

128461 TGGGAACAGG ACACTCCCAA CAAGACTGTC TCCTAAAATA AGACTCATGC ATCCATTTCA

128521 CCCAAAGACT ATCAGCCTTA CTAGCTATAG CCCACAGAAG CTTGATAGTA GCAGCTTTGT

128581 TCCAATCATG CAAATGGATA ACATTCCATC CCCCACTGAC TTTAGGTAAG CAAATTTGTT

128641 CCCAAGAGAC AAGAGGATTG CTAGTCCCAG TCCAAAGAAA AATCCTAAAA TAACCCTCAA

128701 TCATGGTGTT TGGTTGAAAA CTGCTCTTGT TGGAGATATA TTGAGAAGAT ACACAGCCTA

128761 CAGCTTCTCC CCAAAATGGA TTTGGAAGCC CTTTTGCTTG CAACAGACTT CTGGCTCCGT

128821 GCGGTTTTTC CGCTCTGCAA CTCCGTTTTG CTGAGGTGAG TATGGGGCTG TGAGATCTCT

128881 ACGAATGCCA TGCTCATCAC AAAAGGAATG AAACTCATCA GACACAAATT CTCCCCCTCT

128941 CTCAGTTCGG AGAGCAATAA ATATCGACTT CCGCCTAATG ATTCATCATA GGCCCACATA

129001 AATCGGCATG CACAAGTTCA AGACAAACCG ATCCATGCCA GAAAAGAAGC TCTACTTTGC

129061 TTTCCATATA CACAACCTTC ACAAAAACCA AGCTCACCTA TTTTTGGTAA GCCAACAACC

129121 ATTTCTCTAT GACTCAAAAG TTTCAAACTT TTCACATTTA GATGCCCGTA TCGCAAATGC

129181 CATAATTCAG ACTCATTTTG AGTTTTAGCA ATGAGTGTTC ATAACATCAT TAGAAAGTGG

129241 AAACATTCTA TTTTGAGTCA TATGAACATT TGCTATACTA TGACCAGACT TCTTATCAAT

129301 CACAGCACAC ATATCATCAT CAAACACAAT CTTATAACCA CTACTCATCA ATTGTCCGAT

129361 ACTCAGCAAA TTATGAGATA AGTTCGGAAC ATACTGCACA TCATAGAGAA GTTTTACATC

129421 ACCTTGCACA GTCTTGACTG CAATAATACC TTTTCCTGCC ACTTGCATTT GCTTGTCGTC

129481 TTCAAGACGA ACCCTTTTTT CGACTCATCA AGCTCCTTGA ATAGTGACTT AGTCCCGGAC

129541 ATATGGTTTG AACATCCACT GTCCAAAAAC CACACATCGT TGCTGCATAT TGAGTCTTGA

129601 ACATGTGAAT GGGCTCTTCC ATTTTTTCGG AAAAATTCGC TTGTGGTCCA ACAATCAACT

129661 CTCTGCCTGC CTCTTTATGG CCATATTTTT TGCAATATGG GCATTGAATT TGAGACTTAT

129721 GTTGACGAGA ATCATTGAAA TGACCTCTGC CTCTTCCACC ATCACCACCA AAATGAAAAT

129781 GGCCTCTGCC TCTTCCACTG TCACGACCTC CACGACCTCG GCCTCCACGA AAACCACCTC

129841 TACCTCTGCT TTGGTTTCCC AAATTTGCAC TCTTCCCCGG AAGTCTCACC CTTCACTTGA

129901 AATGCTTTCT CCTCCACCTT AACACTTTTC TTTTTCAGCC TACTCTCATG AGCTAACAGA

129961 GACCCCATCA ATTCATCAAA GGTTAGAGTA GTTAAATCCT TTGATTCCTC AATTGCAGGA

130021 ACAATATGAT TCCAATCATT ATTCATACTC CTCAAAACTT GACTCACAAC CGTTTCACTA

130081 CTAATTGTTT CACCGTAAGA CCGCATTTGA CTAACAATTT CAGTTACTCT AGACAGAGAA

130141 TTTTGCACAG ACTCCTTATA TCCCATAGAG AATTCTGCAA AATCACTACG AAGAGTTTGC

130201 AACCGTACCT TAATGACTCT CTGATCACCC AAATACTCCT GCTTGACTAT TTCCCAAGCT

130261 TCATGAGCAT TACTTGCTGC AGAAATTCTG GGAAAAAGAT CATCATCTAA TGCCGATTGA

130321 ATGAGGAACA ACGCCTTCGC ATCCTTCTTG CGGTTCTCCT TCAACGCCTG ATCGGGCCGG

130381 TGCCGGACTC GGTTCTGTAT AACCGGTCTT CACCAAATCC CACAACTCTT GGGACTTTTT

130441 CAAGGTCTGA ATTTGACCAT AAATGATCTT TTTCTCCGGG AATTAAGGGT TGAGAGGATG

130501 TATTTGTACC ATTTCCTGCC ATTTTGAATC ACTCAATTTG GGTTGCTCTC AAATGAGGTT

130561 TATCACGGGG TGGAATTTAC CTGCGGCAGG ATCTTTTGTG TTTTGGAATG CTTTCCGCAA

130621 CACCTAATCT CCAACTTTGA ACACCTTAGC CTTGACATTC TTATTGAAAC TTCTGGCGAC

130681 GAGAGCCGCC GTTCTTATTA ACGCTGCTCC CCTCTTCTAT CGCGTCCAAG TTGTTTTGTT

130741 GTACATTTCC ATGTCGTTCC TTTCCTTCGT CATGAACGCC GTCCTTGGGT AATGCACTTC

130801 AACTGGTAAG ACAGCTTCAC AACCATACAC CAACGAAAAG GGTGACTGTC CTGTCCTTTC

130861 GGTGTCGTCC TATTTGCCCA TAAGACTGCG GGTAGTTCTT CAGCCCATAA ACCCTTAGCT

130921 GCTTCAAGTC GCTTTTTCAG TGCACCTATG ATGGCTTTGT TACTAGACTG ACTCTGCTTG

130981 GCCATTTGCT TGAGTCGGCG TCGATGTACT CAACTTAATG CCAAAATCCT TCCAAAACTT

131041 TCGGGTTCTG TCCAAACGCT GATGAACTGG GACCCATTGT CGCACACTCT TTCTGATGGT

131101 ATGCCGAAAC GACAGAGAAT GTTTTTCCAT AAGAAGGATG TGACCTCTTT CTCAGTCGCC

131161 TGCTTTCATG CTTCTGCTTC AATCCATTTG GAGAAAGAGT CGGTTAGTGC TAACATGAAC

131221 ACCCTTTGGC CAGGAGCAAC GGGCAACTTG CCGACTCCAT CCCCCATTTC ATGGTCGAGG

131281 AGGGAATAGT CCCCGGCCAT AAGGTTTCCA AGCATGGCAT AGAGGTTGAT CCGGCAAAGG

131341 TGCCGGCAAT TGAGAAATTA CCCCCTCGGT GACGGGAATT ATAGCATTTC TTAGTCACGC

131401 CGGGTTTTAC CTCATTAAGA ATTGGCGAAA CCTTTGACGT CCAAGCTTTG TTTTGTTTTG

131461 ATGATGCTTG TCATGAGGCC TTGAAAAGGG CCTTGACTAG TGCTCCTATA GTGCAAGCTC

131521 CTAATTGGGC CGTTTGAACT AATGTGCGAC GCAAGTGATT ATGCTATATG GTCAACGAAT

131581 AGATGGGAAG CCGCATGTCA TCTCTTATGC AAGCAAGACC TTGGATGATG CCCAAAGAAA

131641 CTACACCACC ACGGAAAAAG AGATGCTAGC GGTGGTCTTC GCTTTTGAAA AGTTCCGGTC

131701 CTACCTTGTG TGCAACAAAG CAATAGTCTA CACCGACCAC GCCGCGGTTC GATACTTGAT

131761 GTCAAAGAAA GAAAAGAAGG TATGTAATCG CTTATGCGAA GCTTATGGGC GGGATAGAGC

131821 TCAAAGACAG GCTGAGGGCA GACGAGACAA GGAAGCAAAG GAGAAAAAGA GGCTAAGGCT

131881 AACTAACTTA CATGATTCCA AGTCGTTAAA ACCTGCCTGA AAAGTTCACA AAGTATTGAA

131941 AGAGAAGAAG CCGTTCCAAC TGGTCCTATA ATCCTAGGGT AGTAGTCAAC CCGATGTAGC

132001 CCGAAGACGA GTACCAATGA ATAGAGTATC CCTATACAAT AGACGGCAGT TCCATTCTAA

132061 CTATATGTCT TGGCTTGGCT AGGTTTCAAA GGCAGGACTT AAACCTGTAA CTCTTTTCTG

132121 ATTTCATATA AAATGCCCTT GCCCCGCCGC CAAAGAAAGG TAAGAGAAGA AGCGCTGGGT

132181 CGATAGAGTC ACTTTGGGTA ATATCGGTCA GCAGTTGAAT TGCAGCTTCA TAATGGCGTT

132241 AGAGTCATTT TGTCTTTTAA CGCTGATTCT TAAATAGAAT AAGAGAATAT CATAAGAGAA

132301 TCAAGGTGAC ACCAGTAAAG GTGAGACTGA AATCCCATAA TCGAATCTGG CTCGAAGAGA

132361 CAAGTAGAGT ATATATGCGT CGAGAACGAT CAAGTTGTAA GACGCCGGAA TCGGTCTAAT

132421 CCCATTAACA TGGAATTCTT CCCTTAACGG TTCTTTGGGT TCTAGCTCAA TCCCAACCAA

132481 ATTGCATAAA TGGCGATCGT AGGCGGCGGG TTGAAGAGCT TAATAGAGTA GCTGTATGTT

132541 CATCCTTCTG TTCATGTTGA AAAATTGCAT GGAGCCTCGA ATTATAGAAC TTGGAGAAGA

132601 GACTTTGAAG TGAGTCTATC TGCAAGAGGA AAGTTAGGGT TTTTTACAGG GGGAGTTCAA

132661 AGAGATGAGT CTGATAAAAC AAAGCAACAA CAGTGGGATG TGTGTAATGA CTTGGTTATC

132721 TCATGGATAT TTGGGTCAGT GGAGTGGATG AGTCTATTAA GAAATGCATT ATGTTTATGA

132781 CTAATGCCAG TCAAATGTGG AGGCAACTGG AAATGATCTT TCTAGTGGCC GATGGATCTA

132841 GAAAGTACCA GTTGAACAAA CTCACCTATG AAACCTTGCA GAAAGGTAGA ACAATCTCAG

132901 AGTATTATAC TGAAATGAGT GGTCTGTGGG AAGAACTGGA ATCACTGATT ATGCTACCCT

132961 CTGTAACACC ACACCCGAAG TGCAGAAGTT CATGACTGCA CTTAAGGGTA GAGGTGATTC

133021 AAGAATGAAA ATGTCTGCAA ATGTATGTAG TCAAGGAGAA AGCAGTGGTG GTGGTCCTAT

133081 AACTGCACAG CAGCTTGAGC AACTGCTGAG AATGTTGCCT GTGCCCTCAA AGACAGGAGT

133141 GAGTGACAGT GATGATGACA TGGAGGCATG CTTTGCTGAG ATGGTGACAT GTAATCTTGC

133201 TACAAGTGTG GGGCAGGAAT GGATTATTGA CTCAGGGGCT ACACATCACA TGACAGGAAG

133261 CAAAGAGATT ATGACAACCT TTGTTGAGAG CAAGTTTGGT GGAAGGAGAA ATCTTCCAAA

133321 TGGTTAAACA TCCAAGGTAA CACACCAAGG AGAAATAAAG TTAAAGAGTG GTATTGAGTT

133381 GAAAGATGTG ATGTACATAC CATCTTTCAA ACACAATCTG ATGTCAGTAC AAAAACTGAC

133441 TGAACATGAA AAGTGCAAGG TGATCTTTCA TGCAGGACAC TGTGTCATTG AAGACAGTGT

133501 GACACACACT GTGAGAGGGT TAGGTCTGGC TGACAAAGGA TTGTACTATC TGATCAATGA

133561 ACCAATTGAT AGTGTGATCA AAAAATGAAA AAGCAATGAA GGTAGCAGTC TGCATCAGAA

133621 GCTGTTAAAG ATTGGAAGTA CAAAGCATGT CCAGAAATCA AAGCAAAACC ACTAAACTGC

133681 TAATGCATCA GGGTAACCCC ATGACCACCT TAACGGAAGG GTTTCAAGAG GGAACTCATC

133741 ATCTGCAGCA GAATAGGACT AACAGAACCC TATACACCAT CAAAAAGCCA GTCCTTAATG

133801 TGACTGGGAC ATCTACACAA AACATGAGTC AAAACATCTC TAAAGACACT ACTAGGTTCC

133861 TTGCAGCTGC CATGACAAAT TTTTGCATTC CTCTGCAACC AGATGCAGTA GACCACTTCA

133921 GCAAAGCCCA TAACCAACAA TCTGCTCTGA GGACAAGTTT TCCTGCCATG CATAGCCACC

133981 CACTGAACCA CTGAAGTAAA ATAAGTTATC ATATTCCTGA ATCTGAGCTG AGCCAACAGC

134041 ATAAGCCGCA CAGTTTTTGA AAAAGCACAG CTAAAAAAGA GGTGATCCAC TGATTCAGGA

134101 ACAGAACCAC AAAGGACACA CATAGGGTCA CAGGACATAT GCCAGTGTAG CATCCTGTCC

134161 TTGGTTTGGT GAAAAGTCTA TTTTGAACAG CCAACCAAGT AATGAATAGG CTTTTAGGAG

134221 TGGCCAAACT GTTGCAAATT ATTCTTCTAC AAGGAACTTT AGGAGGTTGA GGTCTCAACT

134281 TGTTATACAC CTGCTTAATG CTAAACTGCC CATTCTTTAG AATAGCAGAC CAACCTCCCA

134341 AGTCATCAAC AAGATTCCTT CAAAATCCTT CTCAAATGCC AAGAACAGTT CCTAGGAACT

134401 GTAAAGCTCC AACAATCATT CCTTTTGAAA TAATACACAT GTATCCTAAA TTATAACTTA

134461 GTCTATCTGA CTTATCCAGC AGCCCTTATT TTCTGTGTTT ATCGATATTA CCCTTAACTT

134521 ATAACTTAGT CTATCTGACT TATCCAGCAG CCCTTATTTT CTGTGTTTGC TGATATGACT

134581 CAGCTGTTGT TTAGAGTCTA TCTCAGTTAG AAGTTAGGGT TGATAGACAC AGGCTCGAAG

134641 AGACAAGTCT AGTATAGACG CCGGAAAGAA GAGTAACGTT GATAGACGAA GGTTCGAAGA

134701 GCGACGGCGT CGGGTTTGAA GAGCTTAGTA TAGTATATGT GGCGGAATAA AGCAAGCAAA

134761 TAAAGTATTC ATAGGTAAGA TCAATAGATG CATTGGTAGA GCTGTCTTGT AACGGTCTCT

134821 AGGTCGGTCA AATTTGTCTT CTTTCATGTA GAGAGAGCTA GGCCCAGGAG AGGTGGACTT

134881 TCTGGGACAG GGGAAGCCGA GTGGAGAAGG AAAACAGGTG ACTTTATTAA AAGCGAAAGA

134941 TTCTTACTTT ACTTCTTATA TCATTCTTAT ATCATATAGT AGTTGTCTAA CACTTACGCA

135001 TTAAACCTCA TGAACTAAAA CTCATTAGTG CGCACTCGAT CTTCTCAATT AACCTTTCAG

135061 CTTCATTGCT CTAAAAGCAA GCCTTGAATG AATTCATTTA TGACGGAAAG GAATTGCTAG

135121 TCTAGAGGCG GCTCTATTCA AGCAAGGGAA TTGCAAGACT TGCTGGTGAA GGGGTCTATT

135181 TGCCTTCTCG TGTGCTTCGA TTCAGTCAAC TCTTTCTGAC ACGAGGTAGA ACAATAAATA

135241 GGAGAGTGCT TGAAAGCACG AAGAGCGAAT GTTGAAAGCC AGACTAAGGT AGTTCTTTCT

135301 ATCAAGTTGA TGACAAGATT AATAACGACC AAAGCTAATA GGAAATCGGC ACGTACCTCG

135361 CTTTCTTTCT TCTTCAGGTT AAGTCAATAA AGCTATCTGC TGCGGGAGAG GTTACTTCTC

135421 CGACATGCAC CGCTTCGACT CAAATAAACA GTGATTCAAT CATCTCAAGG CGGTCTTTGA

135481 ATGTGTCGGG AACCCTCGAA GTCAAGATCT GGGTATCGTA ACACAGTCTA TTTGAATCTT

135541 GGGGCCGGGG GACATCTCCA TAGTTGTGAC CTTCCCGACT GCCAGCCCTA TGAACTAGCT

135601 TACCAGCTCG ACCTTTAACG ACGGGACAAC AAAGAAAGGA CATTTAACCC AAGAGCTCTA

135661 GACCAATAGA CCCAAGCAGA GCTACAAAGC TGGCTAAATA CGGATCGGTA CAATTTTCTC

135721 CAATGCGGAT AACGAAAAGA GAACAAGGAC TAATAGACAG TAGGCCAATA GGCAAAGTTA

135781 CACGTCTAAA AGGAAAGCGC TCGCCTCGCT CCAAGCTCTA TAGTTCTCTT TAATACTTCC

135841 ACCTATCAGC CTGTGAACCT ACACCCGCTG ACGTGTCTAC TCGAATGACT GAAGAGAAGT

135901 CCTTTTACGC GGCTGAACGA ACAGAAAGTC GAACTACTAA CAGGATTGAA GTCCACGGGC

135961 GGATCGACCT ATAATAAGTC TTTTCTTTGC TGGCTTGACT CCAGAACTAG TACTGGAAAG

136021 AGTTGGTCTT TCGATTAGTA AGTAAAGGTT CTAAAGACTG AGGCGATAGA CTCAGAGGCG

136081 GAGAATAACG CTGAGCCGGT AGGCTCAGAT GAAAGGACTG AAGTAGCAGC GATAGACTCA

136141 GAGGAGAAGC GACAAGTCTA GTATAGACTT CAGTAAGGAT CGAAGACAAG TTGATAAACG

136201 CCGGATCGAA GAACGACGTT ATGCGTCGGG TTCGAAGAGC GACTGCTAAG GTTTGAAGAT

136261 CGACGTATAG TATATGCGGC GGGATGAGAA GGAGCTTTTA CGTTACGCTT CAATAGAATG

136321 CAATTTTTAA GGGTAGAATA CGCCCCATGG TCGTCTTTCA GAACCTGTAC TACTTGAACT

136381 CAAATGAATC TATCTTACTT TCAATCCATC TTTGTCCAGC CAGCTCATAA TCAAATGTTA

136441 GACCAAAGCT GACACAACCG AATTGGTTGA AGAAAAGGAA AGCCCAACAA CCAAGCCCCA

136501 AAAAACGGAA ACCGAACGAC CACCAGGCTC GGGGGCTTTA GCCCTCTAAG TTGACCACCC

136561 TACCCACTAA TTAATGGACT ATGAGGAGAG CAGGCGAACC GGAACCGACC GAATCACTGT

136621 AGCAAACCCT CCCTTTACTC AATAGATAGC GCTTATCCTC TTTCAATCAA AAAAAAAAAT

136681 GAGAAATGGG ACAGAAAAAG GTCTTTATTG AAAAGGCTTT GCACCTGAAA TAGGACTCCA

136741 TAAGAATGAG TCCGGGCTTT CAAAAAGATG AAAATGCAAG GTATGTAGCC GCTTATGCGA

136801 AGCTTCAGGG GTAAAAAGAA AGTCTTTTGA ACAACCAACC TGACATAAGG CAATGCAATT

136861 GCTCGCCCGC TTAGAGCAGA TGGAGATTCT CGGGCAGGGA AAGGTGGCAC TCGACATCTA

136921 TTAAACAACA CCAAGAACAA AGTCATACCA TGTCCTCGAA AGAAAGACGT GATGATTGCC

136981 ATTCATGCTG CCCTCGAGGA CGTGTAAAAG AAGGTCTTTG CCCATTCGCC TTCAACATAG

137041 TACACCTCTC AGTAGAAGGG AAAAGGCCGT GGAGACTTTG ACCGAATGAA TAGGCATGCT

137101 ATCATGATAG ACATTTTGAT TCAGGAAAAG AATCCAGGAT GAACGCTTTT TTCGTTCGCT

137161 ATGTGCTGAC TGGATGCGTA CTCGCGCGAT CGATCGATGG ACGAGGAAAT TGCGTGAATG

137221 ACGAGACCGG CCTAACCTAA AGTCAAGGCT CTTCCCTCTA TGGTGAATCT TGATTGACTG

137281 ACACTAGGAA GAAATTCGGA GAAACAAGAA GCATGAGATA GGCGGCGGAA CAATTTCCGA

137341 TAGCGAATTA CTTGACTCGA TGGATGGAGG TTTGGAACCC AACTCAAGGA CGAAATCAAT

137401 GTTGAGTCAA CAATCATCGA GAAGGGCACC ACCAAGCGAG ATCGAGACCA GCACCTTGTA

137461 TAGGGTGGAA AACCTGCCCT TCTTCCAATA TCCTATGCAA GCTTTAGCTT GACTAACAAG

137521 CGCGAACCTT ATTGAAAGGT CCCCTCCTTA CTATAGTATA GATAGGCTCG AAGCTATTTG

137581 ACTTGGAAGG GTATCGTCAG ATACTCCTTT AATAAGATAG AAAGGGCTTT TTCAGCTTGA

137641 TCGGAATCGA TTCTATGATT GAATAGCAGA TACTTAATAG TAGAAACTCG GAGAGACAGA

137701 TAGAGAGGGG ACTCTATCAT ACCTGCTAAC TCCTAGGATG AGAAGTCAGT CTCTTGTTTT

137761 TGGCAGGAAA AGTTCTACCT TCGGTAGAGT GAGTCTACTT AGCGAACTGG ATGGAAGGAC

137821 GCGGAGATCG ATTGATCAAT ATGAATCTCG AGAGTGGATG GTTTACTGCC GCCCCCTTGT

137881 CCTTACGTCT CCCCGGCCGG GGAGGGGCTT GCTATCGTAA CCTTTTTCCC GGTGTATGTG

137941 AAAAAAGTGA CGAACCCATT TCGGTCATAG GTTAGTCCAA AGAACGAGAG TCGGCTTCCT

138001 TAAGTCCGTT GTTCCTCAGT AGCTCAGTGG TAGAGCGGTC GGCTGTTAAC TGATTGGTCG

138061 TAGGTTCAAA TCCTACTTGG GGAGAATTTC TAGTTATCGC TTTTCTGACC TAGCGACCCC

138121 CGTCCTTCTA CTTCGTGTCT AAACTAGCAG AATCGTGGGA CATCAAAAGT GGGAAGTTGA

138181 TTGTTGGTTT TTATTCCTCA CTCTCGTATA GGCGAACTTG GTTCGTTCAA TTCTTAGGGA

138241 GAAGAAGGAT CCGCTGGGAA TGAATGGGCA GACTGAAGTA GTCTCTTCAT TAGCCGGAAG

138301 GAATTAGTCT CCACTAGCGT CATTCGAAGA ACGAACAAGA AAAGGCTGAC TGTTTAGGTA

138361 GGATAGATGG ATATGGTCCA ATGGCATGGC TAAAGCTCTG CCAGCTTCTT GTAGACTGAA

138421 CTTTCGGTAA GATGTTCTAA TTTCTCTTCT AACTAGTGGC AACGAAGTTA TTGGTAATTA

138481 GCAAGGAGGG AGGAAGATCT CCACTCATTT CATTCAGTGC CTGCGGGGCG CGACCCACAA

138541 CAAAGGAAGG GGGAAAGCTT GCTTGCTGTA GCCCTTTTTT AGTAGACTAG GCTTAGTAAG

138601 CGTAAGCTAT TTAAGTAGGC TCGCAGCTTC GCCAGAAGCG ACGAAGGGGG GCTGGGGAAG

138661 AAGGCCGACG ACTACATGAG AGGGAAGCTG TCTACGAAGC TTTGCCCCTT GCTTTACAGA

138721 GATTGTTATG AACTGACTAA ATGACGCTAT TCCCCCGCTA AGCTAATAGT CTTAGTTTCT

138781 CAATAAGCTT ATTGATTGAT TCAGCGAACA AATCGCCTCC TTCTCTCAAC CCATTGAGGA

138841 GGGCCTCGGC CCGGGAAGGG GAGAGTGGCC GAGTGGTTAA AAGCGACAGA CTGTAAATCT

138901 GTTGAAGTTT TTCTACGTAG GTTCGAATCC TGCCTCTCCC ACTTTTTTGT TGTAGACTTC

138961 AGAGAAGAGA AAGAAGGCAT TCGTCAGCGG AGGAAGGCCA ACCGAGCGAA GCTCTTTCTT

139021 TTGGCCGTGC CGTGAAGTTC AATTGTATCG TATGTTAGTT AGAGAGGTTA GCGAACTACT

139081 ACGATCTATA GATTCTCCAT CTATATCCAA TCCCAACGAG AATAGAAGCG AGTCGCTTCC

139141 GGCTTGGCTT GTAATCGTAG TCTTGACGCT TATGTAGTGG TCGGCCTTCC TACACGCACG

139201 CGCTCGCAAG TACAACTTGC CTTGGTTCGG GACGAAGCCA AGCCGATACA TACGATAGGC

139261 GAAGGAAAGA CCCCCATTTC ATAGCGCCTG GAGAACGCAA GTTTGATCGA GGATTGGAGA

139321 GGAAAGGTGG AAGAAAAGGG GATGGATTGT TGAGTCTTTG TGCGAGCCGT ATGCGGTGAG

139381 AGTCGCACGT ACGGTAACGA GGGGGGTTCG CGTCTATACG TGTAGTGTGG TGGTTGGGCC

139441 TACCCACCCT ATTTGTTCCA TGATCTATGG GTCTACAGGA GCTACCCATT TCGATCAATT

139501 AGCCAAGATT TTGACCGGAT ACGAAATCAC TGGTGTTCGA TCTAGTGGTA TTTTTATGGG

139561 GATTCTTTTT ATCGCTGTAG GATCCCTATT CAAGATCACT GCAGTTCCTT TTCGGGCGGC

139621 TGTAGGACGG ACGGCCGCCT ATAAGTGATA GGGTAGGGTG GGTGGTACCG CTCAGATTGC

139681 GGCCAATCTT CCTAACCGCG CGCGGGCCGG GCCGGGCTTA GAGCGCGTGA AACTCATCAC

139741 TACCTCGTAA GGGCGTTGAG ACCATAGCAT GTTAAACGAA AGCGCCGCTT TCTCTGACGT

139801 GTTGTCACAC AGCTGCCCGC CTAGAAGAGC CACTCGCTCT GACGTGTTGT CACACAAGAT

139861 AAGCACGCCG CCCGCCTGCT GGCCGGGCGA ATCGAAGTTC TCTTCCGGTC AACTGTCCAC

139921 CCAGTCAAGT GCAAAAAACA CAGTAGAATC ACGCAATGCA CGCTGCTGGT GTGCTTCCTG

139981 CCCGCGAGGA AAGAAAGAAG AGCGACAAGG TTCAGTTCAG ATTTGACTGT TTGCAGTATG

140041 GGAGCAGATT ACCCAAAAAA TCCCTGGGAA CAATGAAAAA AATAGATATC TCGGTATCGA

140101 AAACTATAGG AGGCTGTATT GGCGAGATCC AACGGTAAAC AGCTGCCTAA AAGAAAAACC

140161 GCCTGGAAGT CCGAGGACCT TTAGTACTGT ACCCTACCCC CGAACCAGCA GCCTTCGCGC

140221 CAAGCAAGAC CGCCCTTGTC CCTTTCCTTT CTCCATTCTG CCTTCTTCTT TGCTTTGTTC

140281 CAAAACAGTA ACAGGCAAAG CGTCAGTGGT TCGTATGCCT ACTTTACCTA CTTGACGAAA

140341 GGGAACGAAC TTTGTTTCGT TTCCGGGTTT ATGGATTGGA TTCAGTCAGC GTCACTCCTT

140401 CCTTTTTCTT ATGTCGTGAC GCTTACCAGC GAACGCTTTC AAAGGCGACC CTCTCGAGTT

140461 TCCGGCAGTT TCCGTCATTG AAGTAGCCTT TCGTCGCCTT ACCAAAGGTA ATTCCTATTT

140521 TCATACTTGA ATAAGTAAGG TTTGCAAACC AAGTATAGTA TAGACTAAGA TCGAAGACTG

140581 AGTTGATAGA CGATAAATAA CAGCCGGGTA ATATGTTAGG ACACAGAAAA GAAGAGCTGC

140641 TTCATAAGTC AGATAGACTC AGTTAGAACT GCCTGCCGGG TAATATCGCC AGACACAGAG

140701 GCCGGCGGGC TGCTTCATAA GTCAGATAGA CTCAGTTATA AGTGGAGTAA GGGCGATAGA

140761 CACAGTTTAG TAGAGCTGAA TAACGTTGTG AGACTCAGAT TCTCAGACCT GGTTCGAAGA

140821 GCGACGTATA GTATATGCGG CGGGAAAGAA GTCACTATCA AAGAACTCAC ACGACTGAAG

140881 TACCAAAGGT GCGCTCCGCC CGATGACTAA GAAATAGGTT TGCGCTTGAA TTGAAGTGAT

140941 GAGGTCGCAA AGAGGAAAGT AGGGCTCCTA TTGACTAAAG GTTGCTTCTT CGGTTTCCTT

141001 TAGAATGAAA GTAGCTTACG CTACCTTACT ACTTACTTTG TTTTATTCAA AGGTATAAAC

141061 CCCCTCAACT AGTCGTATGG GGCGGGGTGC TTGTGGTAAC TTGGATATGA AGAATTCCTT

141121 AAGAAAGGTT TTCAGAGCTT AATATATACT ATGTGGCGGC AAAGTCCGGT ATTTGACGAA

141181 GATCTTTCTT TCGAAAGAGG GGAACACGCT TTTTCGACCG CGGTGGCGGG CCTTCTCCTC

141241 GTTCCGCTCG CTGGCCTATT GGGATAGCAG CCTTTGGGCT TTGCCTGCTC TTTTTAAGAA

141301 AGAATTCCGG CTCGGCCCGG GAAAGCGCTG GCAATAACAG AAAGGAAGGG GTCCATGTAG

141361 CTGCTGCGTC CACTGCCTTC TTAGTCAATA GAGCAGCAGG TTCGGCATCT ACTACAAAAG

141421 AGAGAATCCA CTTCAGATAA CCACGCCTCT GCTAGGCAGC GTGTGGAATG GCCGAGAGCG

141481 GACCTTTTTG GATATATAAT CCAAGTCGAG AGTGGAGTTA CGGGAACAGC CGTCTGATGG

141541 AAAACAACTT TCACGTTCGG TTCAGAGAGC ACTTTTTTCG TTGAGAATTC TTCGTTCCCT

141601 TTCGTGTGAA TTCCCTAGCG GCGAATTCCA AACTTTTTGG GCCCTATCTA TTCCATCTAT

141661 CGAGCCCCGA AGAAAACCCC CCTCCCCTTC GGACTCAATC TCTTTTTTGA CTCTATATAT

141721 GTGGGCACCT GATATCTATG AGGGTTCACC CACCCCGGTT ACAGCATTCT TTTCTATTGC

141781 GCCTAAAATC TCTATTTCTG CTAATATTTT ACGTGTTTTT ATTTATGGTT CCTATGGAGC

141841 TACATTGCAA CAAATCTTCT TTTTCTGCAG CATTGCTTCT ATGATCTTAG GAGCACTGGC

141901 CGCCATGGCC CAAACGAAAG TAAAAAGACT TCTAGCTCAT AGTTCAATTG GACATGTAGG

141961 TTATATTCGT ACTGGTTTCT CATGTGGAAC CATAGAAGGA ATTCAATCAC TACTAATTGG

142021 TCTCTTTATT TATGCATCAA TGACGATAGA TGCATTCGCT ATAGTTTCAG CATTACGGCA

142081 AACACGTGTC AAATATATAG CGGATTTGGG CGCTCTAGCC AAAACGAATC CTATTTCGGC

142141 TATTACCTTC TCTATTACTA TGTTCTCATA CGCAGGAATA CCCCCGTTAG CCGGCTTTTG

142201 TAGTAAATTC TATTTGTTCT TCGCCGCTTT GGGTTGTGGG GCTTACTTCC TAGCCCCAGT

142261 GGGAGTAGTG ACTAGCGTTA TAGGTTGTTG GGCGGCCGGA AGGTTGCCAC GAGTAAGTGA

142321 GTTTGGGGAC CGAAGGCAGT TCTCCGTGCA CCGGACACGT AGCTTACCGA ATCAGTTGCG

142381 ACACTGATGG GAATGCATGC TACGAAAGAG AGGGTCGAGT CTGATACATC AACCGTCTGT

142441 CTACTCAATA CCCTTGTACG AGTCCACAAT CACTACACGA GATGAACCCT GGTTTGGTGA

142501 ATTTGAGTTG GCCTTAGGTG TAATAGGACT CCCAGTTACT GCGCACGATC GTATACTGAG

142561 GTGCTCCCCG CCGGTTGTTG GAACGACGCG AGCCGGGCCT CAATTCAGAA AGAGAAAGGG

142621 CCCAAAAGTA GAAATAGGAG GTTTTCAATT CCCCATCTCA TTGAGGGCGG AAAACGAATC

142681 GACATCTCGA TGTGATACAG CCTTTTCTAT TTGAGTTGGG AAAGAACGGC GAAGTCCATC

142741 CAAACCGTCC AATGAAGAAT AAGAAGAGAG CAAAGCGGAA CGGACACAGA AAAAAAGAAG

142801 TGTGGAAGAG AAGCAGCCGA GCTCATTCCC TTCGCTTCCT GGGCCCAAAG CAGTGCAGTC

142861 TTTCCTGGCC AAATCAAGGA TTTGGGGCTT CTCTTGCTAC GCTACTTAAT CCATTTCTTT

142921 CTTTTTTGAA TCTATATGAA TAGAAAGATA GATCTATCCG TCTATCCTAT CCGATTTCGA

142981 TTTTGATATC TAAAAAAGAA TCGATTTCAT TCAACGTTTG ATTCAAAGAA CTGCGCTTAG

143041 CCCCCCCGCT CATGAAACGG CTTTGCTGCA ATGTGGATGG CAGAGGGTCC GTAGTACCCG

143101 AAGCACTGGA GTGATCCAGT AGCGGGGAAG GGGCCTAGAA GTGCCTACTA CTACACCACG

143161 CTACACTTGG CTCTACACAT TGACAGAGCT AACCCCTGTC CAGTGCCTGG CAGAGCTAAG

143221 GTAGCTTGCT TCTACTCTTT CTCCCTATCT TCGCCCAGGC TAACGGGGCC TTACTTTTTA

143281 AGGGGGGAGA GTGGAGCCTC GAGAAGAACT GTTGAGAGGA AGATCCTTGG CCCTTCTTCA

143341 TTCTCTACAG GGTTCAAAAC CTTTCTTCAA CATAGGTGAC AACGAGCAGG GCAGGGATGG

143401 AAGAGATCAA ACACGGGAAT AAGAAGTCAC TCTTGTGACC TTTTTGATCA TTTTTTTAGG

143461 GGGGGATCGG GAAAGTGGAC AAAAGAGACT CGTATTTCCC AGTCGAAAAG AGGGGTTCCT

143521 TTTTCGTCTC GAATTTCTCA TCGAACAAGA AAAGAATCAT ATTGAAAACG CTCCTAACCC

143581 AAGCCCTTCC TTCGTAGAGC CGTGTATTGT AAGTGATCCG AACCTGCCCG GAGCGAGCCT

143641 CCCATAGAGG CAAGTGAAGT TGGTGAGCCG TATGATGGGA AACTATCTCC TGCGGTTCGG

143701 AGAGGACTCA GCTGTTAGTT AGTACCCTCT TGGTTTCGGA GTGGACCCTT TCACTCACTC

143761 TATTTTATTA TATACGTTTA GTGAAAAGAA TGTTTTTTGA TACACCTAGA ACATGGATTC

143821 TATATGAACC AATGGATCGT GACAAGTCGT TACTACTAGC AATGACTTCC TCTTTCATTA

143881 CTTCATCCTT TCCATATCCT TCTCCCTTGT TCTCAGTTAC TCATCAAATG GCACTCAGTT

143941 TATATCTTTA AGTTCGATCA TTGACAAGGT TCAAAGAAAG GATGGGCAAT TGATAAAGAA

144001 TCGATTCCAA ACCACAATGC TAGCAGATGG TGGTCCTCTG CTTTTCTTGA AAGAAAGATT

144061 CGATTAGTTA GCTCGTAGTC AGTCTATACT TCACTTCAAA AGCAAGAAAA CGGATGTTAG

144121 CCCTGCGTCT TACGACTTGT GTCTATCGAC CCTGCTGGAG GCTTTCGCTC AATCAATCCC

144181 TTGCCCAAAG ACTCCCATGC CTTTCTTGGT CGGACCAACC CAACCGGTGA TTTCCGACAA

144241 GTCTTTCTTC ATTTTTGAGC AAGAAGCGGA ACTACAAGAA AGCTTTCTTT CTCTTTATGG

144301 ATAACCAATT CATTTTCAAA TATAGTTGGG AGACTTTACC CAAGAAATGG GTAAAAAAAA

144361 TCGAAAAATC AGAACATGGG AATAGATCTG ATACCAATAC GGACTACCCA TTTCAATTGT

144421 TGTGCTTTCT TAAATTGCAT ACCTATACAA GGTTTCAAGT TTTGATCGAT ATTTGCGGAG

144481 TTGATTATCC TTCTCGAAAA CGAAGATTTG AAGTGGTCTA TAATTTACTG AGTACTCGGT

144541 ATAATTCGCG CATTCGCGTA CAAACCAGTG CAGACGAAGT AACACGAATA TCTCCGGTAG

144601 TCAGTCTATT TCCATCAGCC GGCCGGTGGG AGCGAGAAGT TTGGGATATG TTTGGTGTTT

144661 CTTCCATCAA TCATCCGGAT CTACGCCGTA TATTAACAGA TTATGGTTTC GAGGGCCATC

144721 CATTACGAAA AGACTTTCCT CTGAGTGGAT ATGTAGAAGT ACGCTATGAT GATCCAGAGA

144781 AACGTGTGGT TTCTGAGCCC ATTGAGATGA CCCAAGAATT TCGCTATTTC GATTTTGCTA

144841 GTCCTTGGGA ACAACGTAAT GGTAACGAAG GATAATTCGG AATCAGAATA AGTCCAGTCC

144901 AGGGGACAAA TCAATAGGAA ATGCTATTTG CTTCGTAAGA AGACTTCTAT GAATAGAGAA

144961 AAAAACGATC TGGAAAACAG GGAAAGGGTT CTCTACAATG ACACTGTAGA CTAATTGAAA

145021 AGGATGTAGC GCAGCTCTAC GCCCCTTCTC CTATCGGCGT TATGAAGCTC TAAAGACACT

145081 GTGTCGTTAG ACACAGTCAA CCGCCCCGTC GCCTATACTA GGCTTGATCT TCGAACCTGA

145141 GCCTATCTAT CGGCGCTATG AAGCTCTAAA GACACTGAGT CGTAAGACGA CGTTATGAAG

145201 CTCTGTCGCC ACTTAGCCTA ACGTCTAAGT CTTCGAACCT GCGTCTATAC TTATAACTTC

145261 AAGACCTGCG TCTATACTAG ACTTGGTTCG GAGACCTTCT ACTCTACTTG GTTCTTCGAT

145321 CCTTCGTATA TACTATACTC AGCGTTATTC TTCGCCTCTG AGTCTATCGC CTCTACAGCA

145381 GTCTTTGAAC CTTTGTTTTG GGTAAAGAAT GTCACGGGTT CCAATCCTGT CATCCCTACC

145441 TATTCTTTTC CCCTGGGCAG TAAGGGGGGG GATCCATTGA GATCGATTCA ATTGGGACAT

145501 AGAGAATCTG TTCTTTTTAT GAGACTCTAT ATGATAGTAT ATGTATGCAG GGTGTAGTAT

145561 TGGGTTACAA AAATCATCCT TTTCTTTACA GTCTTATCTA TTGTGATAAG AAAGCGCTCT

145621 TAGTTCAGTT CGGTAGAACG TGGGTCTCCA AAACCCAATG TCGTAGGTTC AAATCCTACA

145681 GAGCGTGATT CCCTTCTTGT TTTTTGAAAT TGAATTAGAC TGAAATAAAT TCACTAAGTT

145741 AAAGAGTAAT CGAATCTCAA ATTCTCCCTA GAGTAGAGAC TAATAGAAAT GTATATATGT

145801 GTTTGGTGTC AAGATCGTCA GAGATCGATC TAAGAGACTT CTGAGTTTGT CTCAAGAGAC

145861 TTACATCAGC TGCTTGAACG ATACCAAATG CGCAATTGTA AACCTATAGA GACTCCTGTG

145921 GAAGCCTAAG CCTTGATATG GGTCCTAAGA CCCCAGAAGA AAGAGAGAAG ATGTCAAGAG

145981 TTCCCTATTC CAGCGCAGTC AGAAGCCTGA TGTATGCTAT GATGTGTACA CGGCCCGAGA

146041 TTTCTTAGGC TCTTGAGCTT TCAGCTGTTT TCAGACGAAC CCAGGACAGG ACCAGCGCAC

146101 TGGAAGATGG TAGGATATTG AGGTACCTGA AAGGAAGAGC GGATTACATG CTATCAGGGT

146161 AAGGATTTGC GCCTAGTAGG TTAGAGTGAT GCTGATTGGG GAGGTGACCT AGATGAGCAC

146221 AAATCGACAA AAGGGTATGC CTTTATGCTC CAATAATAGC CCCATATCTT GGAGCAGTAA

146281 GAAGGAAACT TGTCTAGCCT TGTCCACCAT GGAGGCTGAA TACATAGCAT GTTCAGCATC

146341 AGTACAGGAA GCTGTTTGGT TGAGAAGGTT CTTGCTGCGT CTAGGTATTC TCACTCATGC

146401 CTCAGCCCCA TGTTGAATGG CGGAATCCGC GAGTGAATGA ACGAGTGAAT AAAAGAATTG

146461 GTTAATTCAA TACGTATGTG TGTGTAAAGC ATTGCGCAAC TTTCAATCTT TCCAATCTTT

146521 TATTGGGTCT AGAATGACTA TTTTTCCCAG ATTATTACTT CATTATACTC CATGTCCATA

146581 GCTTACCTGA ATTATCAGTC TGAACACTTG ACACATCATC CCGTCTAGGC GCATCATTTA

146641 TTAGTAGCTG ACCCGCCCCT TACTTACCCG CTCGCTACTG AGAAACTGGC TCCCCAACCA

146701 GATTCAAAGA TTGCATTTAT GATAGCGGGA AATGAACTGC CTTACGCAAC GACAAGGATT

146761 TATGATCTAA GCTCGCTAAA CGCAAGGGAG TCCTTTACTT TAAAAAAGGA AAGAGATTGG

146821 TCGCTCTCGC TTGAACTGAA GGCTTTTCCT ACGACCTCAC TTTTGAAAAC AAGGAAGAAG

146881 ACATTGAATC AGTTTCATTT GGTTAGAAAT CTCATAACAT AAGAGAAGAA AGAAGGAGAG

146941 ATAATTTGAC CCTTTAACTT GGCTTTCAGA GACTTATTTC TCCTGCTATA ATGCTCTCAC

147001 AGGCGGAGGA ATACAACAGA GCAATCCAGC TGGCATTGAA AAGAGATGCT GATAAAGAGT

147061 TCGGAGTAGT TCAATCAAAT CCCCAGGCAG GCGAGACAGA GATACATATA TTCAAAGAAA

147121 AAAAGCTGCT ATCTTAACTG ATTCTTTTCT CAAGGCAGCT AGGGACAGAC GAGAGGATGA

147181 GCTACTAGTA CGAGTAGTGG TTCGGCAGGG TCTTCGATGC GCGTAGTAAA GTAGCCAAAC

147241 AAGGGATGCA AGGATAAGAT TCCTCTCCGA TCACAGTGCA AGTGCAGTGC CATATTACAT

147301 AGAAATAGAT GCGGTATTAC CGGTTTCATA AGATGTTTTT GCTCAAGTGG AATCAGCAAA

147361 TGTGGAAACT TATCGTATAG AAATAGAGTT TTAAAAAACC TTGCCCGATG TCTTCTCTGA

147421 ATGAGTGCAC TACTAGGATT AGGGTTTACC TACTAAGAGT GAGACTAGGG AGCTCTTAGA

147481 GTACGGTATG CGGGAACTCC TTTTTCTGCT TTCATAAGCT AATCACAAAG AAGTCTTGTT

147541 GGATTAGCGA GGTTCGTAGC CCTTTGACTC TTGAGAGATA GGAATTTCAT ACAAGTGGAA

147601 AATGCAGCAA AGTCAAAGCA GGGGGCGATG TCTGGTGAGC ATATGGGTAG GGTTAGTAGG

147661 TACAAGGAAG CCTGTCTTTG GTCTTTTAGT CAGTCTTTCC CTTCCTTGTA CTAAGTAAGT

147721 AGGGGATCCT TTCTTTCTTT CTAAGATTCT TTCTCTCCAG GCAAGCAAGG AAGTAAGCAA

147781 GTAAGGAAGG GGGTCTGTGA TTAATAGGTA AGCCTGTGCT GCTAGTGTTA AGCTAGTGGT

147841 AAGGCAGCAG TAGGCCAATA ATCCTTCTTT ATAAGAGTCC TAAATCCTAG GGTCCTCGTA

147901 GTCCATTAGT AAGAAGGGAA AAGAGCTTAC CTCTTCCCTC TGAAGGATTT ACTTTGACTT

147961 TCCCCTCCTT CGTCAGCCTT TTTCTATTCT ACTCTCGCCT TGAGCCCACC ATACACGAAG

148021 ACTAGTTAGA CTGCCTATAC AACCTTCTCT TCTCCATGGA ATTGACCTAG AAGAAGAAAG

148081 CCAAACAGGA AAGAAGAGTA TGAAGCTGGT CATGTCATAT AGGATGGATA GGTTGGGAAA

148141 CTCTCTCTTA GAGACCGTGC TTATAAAGCT TGGTTTTCAT TCCAACTGGG GGCCGGGCGA

148201 AGACTGAAGT GAAAGGTTGC AAGACACAGA GGCGTAGAGC CAAATAACGT TGATAGACGA

148261 AGGAGAAAGG TCATTCCTTC CCTCTACGGG CCAGTCGTTA CGTTATGGAT TCAGGAAGAA

148321 AAGAAAACGG ACCTACCCTG GTAGCACGAA GACTCGGTTA AGCCTAAGAT TGGCTGGTTC

148381 GGCGGATAAG AAGGAGCTCA ATTGAAGAAG AAGTACACTC ACTCCTCTTC TTGAGTCAAG

148441 CTGGATGGAA AACTAAGAAG AAGAGTCAGC CGGGTAGTAC GCGTGGGAAC AGAACTGGTG

148501 TAACGGCTTA ACCTCGTGGC ACAAAAGAAG AGTGGGTCCC TGGTCTCCCT TACGAGGATA

148561 GTCTTTCCAC GGAATCGAGC TTGGGATAAT CGACAGACAC ACCACAACTT CTTAGTATGT

148621 CCATTCCAAC CAGGTCTTTC CAATAAGGGC AGGGAAGGAA GATAAGCTTT CTTAAGGTGA

148681 AGGAAAGCTT TCTATTGGTT GTTGTTGTGG CAGAGGGTCT GCTGGCTTGA GAGCTGCTTA

148741 GTTGGTTTGA TCTTCTTTAC CTTCTCTCGT CCATTCATCA TAAGACTCCA ACTCAGCTTC

148801 TTACTTGGCA AAAGAACTCA AACAGAACTC CACAAAACAA GCACACAGCT GACTCAGCAC

148861 TCCAAAAACT GTCTGTTTGA GGAACATGAA CTTCTCTTAC ATCAAGGCTT CTATAATGAC

148921 CTTAGGATGA TGGATTAAGC TTGTAAATTG CATTTCCAAC AAATCATCCC TAGGCAACTC

148981 TTCATGATTC TCACTGCCCT GAAATCTCAG GGTGGAAAGA ATGCTTCTAA TTAGCTCCTC

149041 TGGCTGCTTT GACTTTCGTT GACCAGCATA AACTACCTTT GATTGAACTA GGGAGGATGC

149101 TCCTGCATCA CTCTCCCCCT CTTGAGAGGC TCCTTCATCA GATAGCTCTT CATCTTCATC

149161 AACATAAGGT TTATGGATAT CCTACATTGA ATGTAGCTGA TACTCCTCCA AACTCAGCTG

149221 GTAGTTACAG CTTGTATGCA GGCCAACTTT CTGTATAACC TTGAAGGGAC CATCACTTCT

149281 AGGCATCAAT TTGTTCCTCC TCCTGCTAGG AAACCTTTCT TTCCTCAAAT GAAGCCAGAC

149341 TCAATCTCCA GGCTTGAACT CAACTGATTT TCTGCCTTTA TTAGCCCTTG CCTTGTACAT

149401 GTCATTCACC TTCTTCATTC TTTCTCTGAT TTGCTGGTGA AGCTTCTTCA TTTCTTTGGC

149461 CTTGGCTTCT GCATCTTTGC TCACAAAGGC TTCTGAGGGT AGAGGAAGTC AATCCACTGG

149521 GGTCAAGGGA TTGATGCCAT AATTCACCTA AAAAGGAGTA TGGTCTGTAG CATAGGATGG

149581 GGTCCTATTG TAAGCAAACT CAGCATGAGC AAGCTTAACA TCCCAATCCC TCTGTGACTT

149641 GTTGACTAAG GTTCTCAACA GAGTGGTGAG AGTTCTGTTG GTAACTTCAG TTTGACCATC

149701 AGTCTGTGGA TGAGCTGTGG TACTGAACAG CAACTTTGTA CCAAGCTTCC TCCACAGAGT

149761 TTTCCAAAAG AAACTCAAGA ACTTGACATC CCTGTCAGAC ACTATAGATC TTGGCAATCC

149821 ATGCAACCTT ATAACTTCTG AAAAGAACAG ATCAGCCACA TGCATAGCAT CATCAGTCTT

149881 ATTGCAGGCA ATGAAATGTG CCATTTTAGA GAATCTGTCC ACCACTACCA TAATTGAATC

149941 CATGCCCCTG GCTGTCTTAG GCAAAGCAAC AAGAAAATCC ATGCTCACTG CTTCCCATGG

150001 TTGATTTGGC ACTGGTAAGG GAGTGTACAG GCCTTGATGG AATTGGCTCT TGGCTTGTTG

150061 GCAGATTGCA CACCTTGAAA TGACTGCATG CACATCTCCT GCTAACTTAG GCCAATAGAA

150121 ATGATCTTGA AGAATATCAA CTGTCTTGTT GATACCAAAA TGACCTGCCA AAGCTCCGAG

150181 GGCTAGGTTC AAGGGCCGGT CGAGCGTATT TTAGAACCTC TCCTTTACAG TCGAGTTGCA

150241 TTCGCTCCTC TCCCGTTGGT CGAGCGTATT TTAGAACCTC CATGCACCTC TTGAATCAGC

150301 AACTCCCTCA GAGAACATTT AGGAATGCAT AGCTTGTTCT GTCTGAAAAG AAAACCATCC

150361 TGCAATGTAT ATGAACCTGC ACTGCCATCT GCACACTTCA ATAAGATAGG TGAGAAATCA

150421 GGATCATCTT GATACAGAGA TTTAATGCAA CTGAAGCCTA GAACTCTGGC TTCAAGGACT

150481 GATAGCAAAG AGTCTCTTCT GGAGAGAACA TCAGCAACAA CATTTGATGC TCCAGTCTTG

150541 TACTTGGACA CAAAATGAAA GGATTGTAGG AATTCAACCC ACTTGGCATG CCTTGGACTC

150601 AACTTATGCT GTCCATTAAT GTATTTGAGA GCTTGATGGT CTGAGTGTAG GACAAATTGA

150661 GCTGGTCTCA AGTAGTGAAT CCAGTGCTCC AAAGCCCTTA TGATAGCATA AAACTCCTTA

150721 TCATAAGTGC TGTAGTTCAA TTTGGCTCCA CTCCACTTAG CTTCTCACTG AAATATGTCA

150781 CTGGTTTGCC TCCTTGTTGC AAGACTGCAC CAATACCTAC TCCACTAGCA TCACATTCAA

150841 CCTCAAAGAC TTGGTTGAAG TCAGGCAAGG CTAGAATAGG TGCTTCACTG AGCTTGGCTT

150901 TGATCTTCTC AAAGGCCTCT TGAGCTGCTG GTGTCCAGTT GAAGTTGCCC TTCTTGATAC

150961 ACTCAGTCAG AGGTAATGCC AATTCACTCG ACCATAGGGA GAGGGGCGAA AGGGCAAGGT

151021 GCTAAAGCCT CTGATGAATC TTCTGTAGAA GGATGCTAGG CCATGAAAGC TTCTTACTTC

151081 AGTTACGGAG GTTGGAACTG GCCAGGATTG AATAGCTTCA ACTTTATCAG GATCCATTGA

151141 AATGCCATCC TGAGACACAA TGAAACCAAG AAAGGAAAGA CTAGGAGACA AAAACTCACA

151201 TTTCTCTAGT TTAGCATACA ATTTATACTC TCTCAGCTTA GCAAAAACTA GTCTAAGATG

151261 ATGCAAATGT TCACTAACAG AATTACTATA TACAAGGATA TCATAAAAGT ACACAACTAC

151321 AAATTTACCA AGGAAAGGCC TTAACTAGCA CAAAGCTATT TCATAACCAG AGTCTTGCAA

151381 CTAAGATCTT CGAACCCGCG TCTATCAACT TGTCGTTGAA CCTTAATCTA AAGATTAAGT

151441 AAGTAAACTC CCTTAATGCT TTGCATTAAG TCTCCGAACC TTAGCTAGCA CTAAGCTATT

151501 TCATAACCTT TTAAGGCTGG TTTTTTAACA GTCTCTACAG GATTCTTCTA TGTTTACTAG

151561 GGAGCAAAAG AATCAGTTTA CTGTGATCCT AGTATATGTT GATGACATGA TGATAACTGG

151621 AACTAGTCTT GAGCAGATTA ATGAAGTCAA GGGATTGTTG AATAGAGAGT TCACAATCAA

151681 GGTTATGTAG TATCTTATAA TATAATAATA AGGAAGTAAA TAGTTGATTG TTCTTGTAAT

151741 TGTAAAAGCT ATTCTGACCG CTCTTATCTC GATTATTGAT CTTCTCCTTT CTTGCTATCA

151801 TTCCTCCATT CCACTTCTAA AGAATGCGAT CTTCCCGAAG CTGGGTAAGC AATTCAATTG

151861 AAATCAGTCT TAGTCGAGTC CGAAGCCAGG CGATAGCAAA GGGCAATGAG CTGTACAAAG

151921 CAAGAGCCAA CAAGCACAGG TATGTAGTCG CTTAAGCGAA GCTTACGGAG TGATTTGCTT

151981 GAAATTAAGT TTAGAAGCTT ATTTAGTAGT CCCAAGATGA TTAAAGAGCT TATTTTGCAA

152041 GACATGAAGA ATTGAAGAAT ACAGACTGTT CTGTTTTGCT CTGAAGCAGT CTGTCAGTTT

152101 AGAGTTCTTG TTTTTTTGAG GGAAAGTTCA TTTTTGCCTA TGTGGATCGT TGCCAAATCA

152161 CCTGCTGACT ATCTTTGGTG GTCCAATGAG AAGAATCCTA GTCAATAGCA GCTGGAGACA

152221 TTGGCCTCAT CTACAGCCAA TAGGAAGCAA GCTAGAGAAA AGAAGATGTT CTGATTGGAA

152281 GATGCAAGAG GCTGCTGACC AATCACTTTT GCTCCATCTA GCCAGGCTTC TACTGCTTTC

152341 CACTTGAAGA TTAATTAAGT TCGAGTTTAT GTAACCTTGT TTAAGTCTTT ATAAGTCAGA

152401 TTAAGCTAGA TTAATTAGCT GATTAGTTTA GCTTAATTCA GAATCACTTC TTTTGTATAA

152461 ATTCAGCAGC TTATGGTAAG TTGATGTTGA ATGAATGAAA TTTGAAGCCT TTGAGCTTGT

152521 TATCCGAGTT GCTAAGGTGT GTCCTTGGTG CCTCAAAAGG GATTCTTCAA TCTCTAGCTA

152581 AGTTCTAAGG TGTGTCCTCA GAATTTGGTG AAGGTTTGGA GTGGCATAAG CTGCTGGATA

152641 GGTGTGTCCT AGGTAGCTTG TGTATCATCT TTCTTCCCCC TCGCTTTCCC TATCTTAAAC

152701 TGTTATTTTC TAAATTCTCT TGCTTGCCTT CCATCCTTTT TCTAAAAATA GAAAGATAAT

152761 CTGTAAACTA AAGGTGCTTG AATGAGTTTT TCAGTTCAGT AGTTGCATGT TATAGAGGTT

152821 GTTTGTTGAC TTATGAACTG AACTTGTTCT GTTAATCTTA TTTAGCTCAT ATATCTGTTG

152881 TGCTTGCTTG TTATGCATCT CTACATGCAT CAGAAGGGGT CTTCGTACAG GGCTAGCTCG

152941 TCAGTAACTG GTGTTGATTT AGTAACGTCT TTCAGAGAAT GGGCCTTATC AGACGCCACA

153001 TCTTTTATCC GGACGGGAAA GTCCTTGGCG AGAACTCGTA CAAGGCCTAT CTGAGGCATA

153061 TAATAAATAA GGGGACGCGC TCCAGTCTTC CCTATCGCAG GGTAATTAAC GAAATGCTGC

153121 GCTATGAAAA AGGCGAAAGG TGAGCTTGTA CTTTTCTTTT TTGTCGAGAA ATAGAGATCC

153181 ATATGTCTGG ATCAGATCCT TCGTTGCGCT CGTCAAAGGT CAAGGTCTCA AGGCCCTTTT

153241 GTTCGTAGAA ATTTCCCTTT CCTGTCAAGG ACACCCGACA GAATAATTCG CTATTAAATA

153301 GAAAACATAG AATACACCCG ACATTGCAAC CGGATTCTTC CCTTGGGAAA CTGTCTACTT

153361 CGCTCCTCTC CCGTTGGTCG AGCGTCTTCA AACCAGGAAT TAGATCAATT TGATGCTCTA

153421 TGCCCCTGAG GGGAGGCAAT CCACTAGGTA AATCATCAGG GAAAACATCA GCATATTCCT

153481 TGATCAAAGG CTTAACATTT TCAGGTACTT CTTCCTGATT TTCCTCTCCT TTCTCCACTA

153541 AATGCAGGTA GTACAAACTT TGACCCTTAG TTATGGCTTT TTCTAACTGT GGCTTGGTAA

153601 GGATAAGTCT TTGTTTGGGT TTGGCTTTGG TCTTTGAAGT CTGATCAGAA GATGGGGCTA

153661 AGACAGGTAC ACCTGGGGTC AAGGTAATGG TTCTACCATT AATTTGAAAA CTATCAGTCT

153721 TTTTCCTGCC ACTATGCGTG GTATCCCTAT CTGACTGCCA TGGCCTACCC AACAACAAAT

153781 GAAATGCATC CATAGGCAAT ACATCACACA ATATTTGATC TTCATAGTCA GGGCCAAAAT

153841 GAAAAGTAAC TAGAGCTTGC TTAGTTACCT CAACTGTGCT TCCATCATTG AGCCAATGCA

153901 ATTTATAAGG CTCCGGGTGT GAACTTTGCT CACACACACC GGCTGATAGA GGGCAAGATC

153961 ACATTCACTT GCTTGCCGCC TGGCTCCATA GTCAAAAAGT ATAAAGTAGG CCCGCTCCCA

154021 TAACCACACG GGAGGATAAG GCATCCAGTT AAGGATGGAT TATTACGCTT CTTCGCCTTT

154081 GACGCCTCAA TTTGAAAGCA GGTTCCGTAA GTCCAAGTCT AAACAAGGCA AGCCAAAAAA

154141 AAAGATGATT TTTTTCCCTC GCATCGATGT TCTGGTGGAC AACACCGCTG GACACGGGAT

154201 GCTGTCCTTT ATGGATGCTT TCTCTTGATA TAAGCAGATC AAGATGGCCG AAGAAGACCG

154261 AGAGAAAACA GCGTTTATCA CCATATTAGA TAGGAGGGTA CGTTCTGTTA CAAGGTGATG

154321 CCGTTTAAAG AATGCCGGGG CGACGTACCA GCGAGCCATG CATATATAAG GCTGTTTCAT

154381 GATATGATTC ACAAGGAAAT GGAGGTCTAT GTCGATGACA TGATCGCCAA GTCTTGGGCT

154441 GAAGAAGAGC TTTAATTTGA AGAAAGTGTT TGACAGATTG CGGAAATACA GTCTTCATCC

154501 GCGAAAGCAT ATAAGGGAGG AGGTTTGGTG CTTCGTCAGG TAAGCTACTC GGGTTCATTG

154561 TCAGCAGAAG AGAAATCGAA GTCGACCTGC AAAAGCCAAA GCAATTCTCG GCATGCCGGT

154621 ACCAAAAAGA AAGAAGGGCT TTTTTAGGCA GGCTACAATA CATCAGCAGG TTAATTGCCC

154681 AACTCACACC CATCTGTGAG CCGATCTTTA AACTGCTCAG AAAGAATACC CCGCCTTTCA

154741 GAAAAGATAG ACACAAGGAA CGAGGATTGC CAAAAGGCGT TTGACAAAGT GAAGAAATAT

154801 CTACTAAATA AATCTTCCCA TCCTGGTACC GCCAACGCCT GGTCGACCTC TCCTGATGTA

154861 TCTGTCAGTA ATGGAAGCAT CCTTGGTCAG CACGATGAAG CCATATACTA TCTCAGCAAA

154921 CTGATTATGA GACAAGGTAG TAGGTTCTAG AAAAGACCTT TTGTGCTATT ACATGGGCCT

154981 CGCAACGCCT ACGCCACTAC ATGTTGAACT ATACGACCAT GCTGATTGCA AGGATGGACC

155041 CGCTGAAGTA TCTCTTTGAA AAGCCAGCCC TCACGGGCCG TACAGCAAGG TGGCAGATGT

155101 TACTCTCAGA GTTCGATATT GTGTACGTCA CCCAGAAGCC CTAAATGAGT CAGGCAAGGG

155161 GCAGGCAATA GCAGACCACC TGCGGATCAT CCCATCCCGT GCCTGACTAT GAGCTTTCTT

155221 TTCTTAGTAA GGGGACGAAT TTCCCGGGCG AAGCTATTCT ATTTGCGGTA GGCGAAGAAG

155281 AAGACTGAAA CTCCTCTCCC TACGGTCGAG TTGCCTTCGC TCCTCATGAT TGGCAAATGT

155341 TCTTTGACGG TGCAGTAAAT CAAAACGGAA ATGGAGTTGG ACCCTTTCCC CGCTATATTC

155401 TCTTATAGTG ATCTGACTGC TTGCCTAGCC TTTTTCGCGT CATTCTTTCC TAATGCATGC

155461 ACGGGGCTCC TAACAAGCAC CACAGGGCAC GAAAGCGATG CGAAAGCGTG AAACAGACCA

155521 CCCTTCCATC CTCGAAAGAC CGGCCAGCGG GGTCCCTTTC AAGTGAACGG CGCTGGAAAG

155581 GATGCTTCGC GCCTGTAGAT TAGTCAGTCG GGTCAATCAG TAGTGGTGGA ATTTTCCACA

155641 CCACAGGAGC AGAATGAGAA ACTGCTCAGC CAGCACAGCC CGCCGCACAC GAAAGCAGCA

155701 AAGGAAGAGC GAGCGCGCTA CGTACGCGAA CAGCACGCTA CGCTAGAACG TTATGTACCA

155761 CGCAGAGAAT GAACGCGAAG GCTCCAGCCC CGTGGCATCG GGTTCGCTTG CATATCTATC

155821 GCCCCCTCGA TCGCTTTAAA GCGCGTGCTC CCATAACGCC CCTTTATTCA TGAAAGAAAG

155881 TGAGTCGAAT TCGCTCTTCT CTTCTCTGCT GGATTAGCCT AATTGGATGC CGCAACCCAT

155941 GTTGTTTCAA TCTGGTCAAG GCATTGGCAT TTTTAACCAA AGACTGAACC GAACCGAGCT

156001 CTGTCAAAAG CTATGTCTTT ATTGATTATT GATGGAAGCT CTGAGTTCAT AGAGGGCTGC

156061 TGCAGTTGGT TGAGTGAAGG TCTTTATCTG TCTAAAACAG TATAGAAGAA CCGAGTGATC

156121 GTAAAGGCTG CCTGCCGTGC CATACCATTG GGGCGAAGAA AGAAGTAGCT AAGATAGCCT

156181 CAGAGCTGAT CAAATGCTAC TCTAGGAAAA ACAGCTCCCC TAGATGCATG ATCAAGGTAG

156241 ATTTAAAGAA GGCTTATGAC TCTGTGGAGT GGCCTTTTCT AAATGTTGCA TGAGTTGGGC

156301 TTCCCTGCAG TGTTTGTTCA TTGGATTATG CAGTGTTTAT CTACTGTGTC TTATTCAATT

156361 TTGGTTAATG GCTTCCCTAC TGATCCTATG GAAGCAAAAA AAGGACTAAG ACAAGCCGCG

156421 CCTTTTTTCT TTGCACTTGG AATGGAGTAT CTATCTAGAT GCTTACAGAA GGCTTCATCT

156481 GATTCTGCAT TCAAATTCCA CCCAAGGTGT CAGAAAATGG GTATTACACA CATGATGTTT

156541 GCAGATGATC TGTTGATGTT TGCTAGGGCT GATAAACATT CAGTAAAAGT CATATTTGAT

156601 GCTTTTACCA AATTCTCTGA TGCATCTGGC CTTGTTGCTA ATTGGAACAA AAGTGATGTC

156661 GTTTATCACA AAGCTGGCAT TCCTCCCTCT GAAGAAGACA TTATCATCAG TAGTCTAGGT

156721 ATTCCCAAAG GTACCTTCCC CTTTAATTGG AGTACCTTTA ACTACAAAGA AGCTGAGTTA

156781 TACTGATTGC AAACCCCTTA TTGAGAAAAC AGTTGCTAGA GTGAAAAGTT GGGCTGCAAA

156841 AATGCTATCA TATGCTGGAA GATTGCAGCT TATCAAATCT GTTCTTTTTG GTATACAACT

156901 GGATTGAATA GATTTTGGCT TTCCCAGAAG AAGTTCAGTG GGCAACAAGG AAGAGTAGAA

156961 GTGTTAGAGA TTCAGACAAG GTTCACAGCA TGGCTTTTAC TGAAACAGTG TATGCAGTGT

157021 GGTTGCAAAG GAATGCTAAG GCCTTTAACA ACAAACTAGA TAAATGTGAT ACAGTAGCTC

157081 ATAAGATCTT GTTTAATGTA GCTTGTAGAA GCACTGATAA GATGAAAAAG TGCTTCATTT

157141 AGGTGGCTTG TGGGGTTTTC CTATAAGGTG GGGGGAAGCT TTACCATTTA GCCTAGGTGT

157201 TTTGGTGCTT GGTTGTACTG TTTATTCTTG GTAAATAAAT AATAACAATT TCGATTTGAA

157261 AAAAAAAAGA AGAACCAATA GAATCTCAGT TTTGTATTCT GATGCTGGTG ACAGAATTGA

157321 GGATCCTGAT CATATTAAGA GTGAAATCAT CTCTTTCTAC AAAAAGTGAC TTGGTTCCGC

157381 AACTCCCTTG CTTCCAACTG TTCATATCCC TACTTTAAGG AGTGGGCCAT CTCTTACACT

157441 TGAAGCTAGA AACAGTTTGT GTGCACCTGT TACAAATGTG GAGATTGATA TAGCTTTGCT

157501 TGGAATTGGA GATGATAAGG CTCCGGGAAT TGATGGGTTG AATGCAGTAT TCTTTAAAAG

157561 GAGCTGGGGC ATCATCAAAC ATGAGGTCTA TGATGCAGTA AAGGAATTTT TGACTACAAA

157621 AGCGATGTTT AGGCATTTGA ATTGTACCTC TGTCACCTTG ATTCCTAAGG TTCCTAATCC

157681 AACAAAGGTG AAAGACTTCA GGCCAATTGC TTGTTGTAAT GTTATATACA AAATCATTTC

157741 TAAGATTTTG ACTTCAAGGA TGCAGAAAGT GATAGGACAA GTGGTCAATG AAGCTCAATC

157801 CGGGTTCATT CCTGAAAGGA ATATTTCTTA CAATGTTAGC CACTGAATTG ATCAAGGGCT

157861 ATAATAGGAC ACACATTTCG CCAAGGTGTA TGATTAAAGT AGATCTAAAA AAAGCATATG

157921 ATTCCATTGA ATGGAGTTAT TTAAAGGATG TGATGAAGGA GTTGGGGTTC CCTGAGACTT

157981 TTGTGCAGTG GGTGTTTGCT TGTGTATCTA CTGTATCCTA TAGCATTTTG ATCAATGGGC

158041 AGCCTTGCTC ACCTTTTAAT GCTAAGAAAG GGTTAAGACA AGGGCTGCCG CGCCTTTCTT

158101 ATTTGCCATA GGCATGGAAT TTTGAACTAG ACTGTTGAAT AAGTTGAAGG ATGTTCCGGA

158161 TTTCAACTTC CACCCAAAGT GTGAGAGAAT GGCTATTACA CATATGATGT TTGCGGACGA

158221 CCTTCTTTTG TTCTGTAGAG CTGATGATAT GTCAATCCAG TTGTTGTTTC AAGCATTTTG

158281 CCAGTTCTCT GCTGCTTCGG GTTTGGAAGC TAACCTTGAC AAAAGTCATA TTTATTTGGG

158341 AGGCATAAGG GGCCATGAAA AAGACAGAAT GTTGAGTACC TTGCAGATTC CTGAAGGTGA

158401 TTTCCCTTTT AGGCGCGGCA GCGCTCTCTC TACAAAAAAG CGGACCTATA ATCAGTGTAG

158461 GCCCTTGATT GAGAAAGTGA CGGCTAGGGC TAAAGTTTGG ACTGCAAGAC ACCTTGCCTA

158521 TGCTGGGAGA TTACAATTAG TCAAATCCAT TCTTCAGAGT CTTCAATCCA AAAACTTCGC

158581 TCCGATGGCT TAAGCTCAAC TTCGAGCTTT AGGTTGTTTA CATGCTTTTG GTGTCAGATA

158641 TTTCTCTTGC CTAAAAAGGT GCTAAGAGAG ATCCAAAATG TTTGCAGGAT CTTCCTATGG

158701 ACGGGAAACA CTACTCCCTC TAAAAAGGCT TTGGTGGCAT ACTCTATGTC TACCAAGGGC

158761 GGTTGGGGGG TGGAATGTGA GAGACATGAC GGTTTGGAAC AAAGCAGCAG TGGCCAAGCT

158821 CTTATGGGCT ATAACTTTCA AAAAGGAGAA AATGTGGAGC AGGTGGATGG ACAGTTATTA

158881 CATCAAGGGA CGAAGCCTAA GAAACTTTCA CTGTCCTAAC CGTAGTATAT AGCTTGGGCA

158941 GTTAAGAAGA TAGTAGAATC TTATGAACTC GTTGAAGAAG CAGGAGGTTG GAATGTCTTG

159001 CAGTTGGAGA TTTGGAACAA AGCTGCCACC ACAAAGCTGC TTTGGACTCT ATCTATGAAG

159061 GCTGATTCCA TGTGGGTGAA ATGGGTGCAT GTCTATTACT TCAAAAGGCT TAACTGTTGG

159121 AGTGCCAGAA TTCCCACCAA TTGTTCTTAA AATTTGAAGA GGATCCTTAA AAATAGAACA

159181 TTGGTGGATA CTGTTGGTGG TTGGTCACAA GTGACGAAGG GGGGGGAGGT TTAGTATCAA

159241 GCAAATTTAT GTGTTACTAA GACCTCAAGC TCAACAGGTT CCTTGGAGAA AAATCATATG

159301 CAATAACATG GCTAGCCCTA AGAGTGTGTT TATTGCTTGG TTAGCTTTGC AAAACAGATT

159361 GTATACTAAG GATAGGATGC TGCTTTGGCA CCTGTCCTGT GACCCTCTGT GTTTTCTCTG

159421 TGGGCAGGGC AATGAGTCTG TGGCTCATTT GTTTTTCCAA TGTTCTTTCT CCAGAGCTGT

159481 CTGGCAGCAG GTTTTAACAC TCCTAAAGCT CAACAGGCCA ATTAAAAGCT GGTGCTCAGA

159541 GGTTCAGTGG GTGACTCACC ATAGCAGGAA GGTTTCAGTG CTCAGTAAGC TGATCTCTAT

159601 CTGTTTTGTT GAGGTCATTT ATGGTGTGTG GTTGCAAAGG AATGCTAAAG TCTTCACAGG

159661 CAGTTGTATG ACTGCTCCGC AGCTTGTTAG ATCTATTGTT TTTAGAGTCT CATGTAGATG

159721 CCCTGATCAT ATGAGGGATC TTTTGATCTG TATTTGATGT TGTTTGGCTT TGGTAGCTTG

159781 TTACCTGCCA TGTGTTGTAT TTGGTCAGTT TGCTGCAAGT GATATGTTCC TCCTTTTGCA

159841 CCCTTCCGTT AAGGTGGCTT AAGGCTTTTT CTCTATTCTT TCTCTTGTTG GTTGCAAAAT

159901 ATCCCGGGCA TCGGTTCTAA GATAGATTCA AATCAAAAGA AAAAATGTTT CATAAAGCCC

159961 TTATTGTTAT TGTTACTAAG AGTTTAATTG CTAAGGTAAA AATTGCTTGA GCTGATAAAG

160021 TTGTAAGGCT GAAGTACCCA AGCCAAGGGT TTAAGCGGAT GCCCCAAGGC TCTCTTCGGA

160081 ATGGCTGGTG ACAACGCTAA TGGATTGGAC GACAGGTACG ATGAGCTCAC TGGCAGGGTA

160141 TAACATTCTT GTCCCGAAGA AAAGCAGATG TTGATGACTC CGAGATAGAC GACCGGATCG

160201 GCAACGGGCG TTGACGAGCA ACATCCCTCT GCCATTGAGT GAATCGTATC AACGAGACAC

160261 GCTAGCGCTT GATCTCTCTC CCTCTATCCG GCTCATCGAA GGCTTGAGAT CGTGCTCTCT

160321 TTGGCTTTGG CTCAAGAGAA AGAAGAAAAT TAGCCGATAA TTTTGAACTC CAATAAAATA

160381 CTATTCCCCG AACCTAGGTG CCTATAATGG CGCCCGGACC GCAAAGCGGC TAGGCTTGGC

160441 TTGTTCCTTC GGTAGCTCTT GACGGCCTTT CGCTCGGGCA CCTTCGATTA AGGTGCCCGC

160501 CCTTCTCTGC GCTCACCCGC CCCTTACTAT AGAACAAAGC AAGGAAATGA AGGAATTATT

160561 ATCGCTTAGC GCTTGTGCTA AGGAAGAGAC TGCAGCAGAA GTCTATGTCA TCAGCTCAAT

160621 GCAAGGCCCG TCGAATCTTC CGGATGGGTC TAGCATCCGT AGGTCAGTTA CTCCAGCGCC

160681 ACAGTTCGAC ATCTCGGGAA ATACCTCTCA CGCACCACGG TCGTCTCTTG ACCACGCAAT

160741 GACCTTCCAA GAATGGGTGA TAAGATAATA CAGAAAGCAG AATCTGAAAG GGAAACCAAT

160801 CAAGGGGATA TGCATATAGC CAGGGGTAAC CAGATAGAGC GCACAAGACT TGGCAGGGAA

160861 CGGGACCGTG ATTCTGAACA GGAACAAACA ATATGGACAA AAGGAAACCA AGGCCAAGAA

160921 GCCTCCGGGA TAGACTCTTC CCTCCCTACG TGGGAGCAAC ATAGACAGTT CCTCGAAGCC

160981 GGGAAGATGA TTTTGCAAGC AGGCCACCCC CTTTCAACTC CACGGAACAT CTTATTCCTA

161041 CTCCTCTTGA GCCGTATGTT GTCCTTTCCT CAGCTAAACT AAGCCAGGTG GTAGTTTACA

161101 AAGATACCTC CGACAAGACG GGGCAGGCGT TCTTCCTCCA ACAAACATCT CCCCAAGCCA

161161 AGCCCAAGCA AAAACCAATC GGTTGTACCG GCAGTATCGG AAGATAAGTC AGCGCCTTTT

161221 TGCAAAAATC CCTGAACCTG AATCCGGCTT CAGTAGCTTT GCCTTCGCTA CAATTTCCTG

161281 CGAAACTTGC AGGTCAGTCA AGCCTGTTAG GGCCTTTCAT GCTCTCCATA GACATAGAAA

161341 GAAGCACAAG CCTCACACCG GATTCAGGCT CTTTTCAATG TCCTGTCACT TTCCTGTCCC

161401 TATCTAGTCC ACCAGCCAAG CCCAGTTGAA CAAAGAAAAG TAGGCCTGTC AAGAAGACAA

161461 GCTCCAAGCA CAACCTCGCT CTGATACATT CCCAAATTTC TTGCAGATCT TGATTTGCAG

161521 CTGCAGGGAG GGACCATCTG GAATTAGAAA GTATGTCTGC AACTTTTGCA TTTTTGAAAG

161581 GGAATACAAA GGCTTGGACT TACGATGAGA TGCCTGGTTT AAGTACTGAT CTAGTATGTC

161641 ATGTCATTCT TTACATATAT ATAAGATTAG TTGGTTCTCG TCCGACCCTA TTACACTTGT

161701 AGTCTCGGTC TCTGGATTGA TTGATTTCTG CTGGCACTGG AGCTTCTCCT GCTGGTAGGC

161761 ATTTCTCGCT AATGGTCTAA CGGCTGAAGG GTGAATCGCC TTAGCTGTGC CTTAGCTGCG

161821 CGATCTTCTG TCTTATACTA GTCCGCTAAA GATGGATTTC TAAAGCCCAC GGACCTTGAC

161881 TAGTAGTTAT GGCGCTACGG TATACTTCCC GTGCCCGAAA GCAAGGCGCT TCAATTCACG

161941 CGCTAGAACT GAGAGAGAGT ACGCTCCGAA GACCTTTCTT ACGTAGTTGG TTGGAGCCAC

162001 TATTTCTGGC AAGGTTTACT CACTGTAAGT TTTTGATTGT TATTCCACAC TTATGGTTAC

162061 ATGATGAGAT CATCTTATCA TCTCTTTGTG CGTGCGAAAT GCTTCTATCT TCATGATCCT

162121 AGGTGGCTAG TTGTACAATA TCTTTATTTA TCCACTATTG GAATAGCTCT TTGGTTGGAT

162181 GTTCAGTCTG ATCGTCGAGC TAGACCGGCA GGACGAAAAG ATCGAGTTGC CTTGCCTGAA

162241 AGAAAGACCG GGCGTGAAGA AAGAGCCCGA TTTCATAGGC GGGGGCATAG GGCAGGAATA

162301 GGAGAAAGGT TTCGAAATCC TATTACATCC AGTACCGTCA ATGATTTGAG CAAGACGAAC

162361 TAGCTTCCTT CATTTTCAGG GAGGAAGGCT TTTTGCCAAA GACAAGATGA TCCCGCTTCC

162421 CCCTCCAATT GAATAGCTGC AAAAAGAGAC TCACCTTCTT ACCCTTTTCG GGAACTCACT

162481 GGCCGAGTTA CACCCTTGTG TGAGACGAGA CGACCCCCAT GCTGCTTGGT AGCGAGTCTT

162541 CGCCGAATAT GAATGCCTAA GCCCTCTCTC TAGTGGTGAG GACTATACTC GGAGTATACA

162601 TATTAGCCCT TTTAGAGGCT ACCTTAACAA CTAATTTATT CTCGGCGGAA ATCCCCCGAT

162661 AAATGAGACC CCCGCTTAGA ATCTCTTCCA GCTGAGCTTC ACTAATAAGA GGCTCTTACG

162721 TCAAATAAAT AGAAAGAGAA TTTTGACTGA CTACACGCGT CTTCGAACCT TCTTACTTTC

162781 CTTCAACTAA TTCAAGCAAT TCAGTCAGTA GAAAAAGTTA ATATACCTTT TTGCTACCCT

162841 GTAGGTAAAG GAGCTAACTG CCCCTTCCCG AAGGTGGGGG AGGAAGCACG TCAGTGCAAA

162901 ATATCCCGGG CATCGGTTCT AAGATAAGAC TTTTCTCTTT TCACTTGATA ATGTTTACCC

162961 CACCTACTTA CTTTTAAAGC CAGAAATAGG ACTAGTCTCT TAGTTAGCCT GTATAGTATA

163021 AGGTGTCAAA CGAGAACGAG CAAGGGCCAG GTAAAGGTCA AAGAGAATAA AGGAAAGAGA

163081 AGAAAAGAGA AAGCAGGTCG TAGATCAAAC TCTTCATCTG ACGGATGGTT TCTTCCGAGT

163141 CTGGTAAGAG AGTCTATCTT TTATGGGCGA ATTATCTTAA TGAAAGCCCT CTTTTTGGCT

163201 CTCGTGTGAG GGTTGTCATA ACTTCTGTCT ATCTGCTGTT AAATGACTTT CGTCAGTCCG

163261 AAGGGCAGTC TAAAAGATAA GGGATTCAAG CCTTAATGCA AGCACTAAGC AAGAGTTCTA

163321 CCTTACTCTA ACAAGTAAGC AAGTAAACTA CCTTATTCGT TTTGATTAGC TGTCCCAGGG

163381 AAAGGACTAA GTATTGGCAG TTGGCATGTC CGAGCTAAGA TCTTTTGAGG CCGGTCAAAA

163441 CGGTTGCGTA GCTTACTTGG TAAAGGACTC CTTTAGTTTA GCGGTCTGCA TCACATATGT

163501 AGGGATTGTA CTCAACGAGG ACTGGATTAG GGTCGCCCTT CCCGCCATTG ATAGAGTTTT

163561 GGACCTCCAA CCTGCAAGCT TGCCATTTCA TTTACTCTAT CAACTAAGTA TTGGTAATCC

163621 GGGAGGACCT TCCATTGATC GTGGGAACAC CAAGATACAT ACCAAGATCT TCCGTAGAAT

163681 CCATCCCAAG GCATTCACAT ATTTCATGTC TCGCCTCACT ATCCGTATTG GCGGAAAAAT

163741 AGATACGTGA CTTATCTATA CTCACTTTAC TCCCCGAAGC CGCACAAAAC GAGTCTAGAC

163801 ATCTTTGCAT CACCCGAGCC TGATCAACCG TAGCTTCACA AAACAAGATT AGATCATCAG

163861 CGAAAGCAAG GTTCGAGACC GGTGGGCCAT TCCTGCTTGT CTTCACTGGT TTCCATTGAC

163921 CCCTATTCAC TTCAAGGTCA ATTAGATGGG CTAGTCTTTC CATGCAAATT AAATACAAGT

163981 ACGGGGATAG GGGGTCACCT ATGTCAGTTC GAACCTGACG GATCGTTCGT TCATGATGCT

164041 ATTCAGGATG GTACTATTCT TCCTTCTTAT GTTCCTACAG AGGTGCAATT GGTGGATATC

164101 TTCACCAAAC CGTACCCTTT AGAGAAAGAA GCGGGTCTCT GATAGTAGCC CTATCAACTA

164161 GTTATTTCTC TAGAATCTGC TATAGGATGT CTCGTTTCTG TATCTAACAG ATAGGACAAT

164221 ATCAGTGGGA TAGGTTATAG CATAACCAGC GAAGCCATAC TCTGGTTGTA CGAAATTAAT

164281 GCTTCAACGC GGATTTCCTC TCATAACCAG GGTAGATATA GTAGAAATGG CTTCTATTCT

164341 TACTGATACC CTTGAGATCT TGCGATAGCT ATCCTACACA ATGATCATAT CAGATCTATT

164401 GTTAGACTAC GCAAAATTGA AGAGGGATGA TAGTCCAGGG TAGAGATAGT GGCAGGATTT

164461 TGATTGGGTG GAATCCTAAT TCTTTTTCAC TCAACATCAT TCATGTCTCT AGTCAGATGA

164521 TTCACTGTTT TGTTAGCCCA ATACATGCTA CTGCTGGGTT TGACTGCTCT ATAGTCTATG

164581 CTCATAATGA CAGGAATGAT AGGGAGGCTT TATGGAATGA CTTCTATAAC TTGAGCCAAA

164641 AGGTTGATGG CCCTTGGGTT TGGATGGGAG ATTTCAATTG TCCTTTGAAC CCTGATGAAA

164701 GAGTGGGTGC CTTGGTGAGG AATGGTGAAC TGATGGATTT TAGGGCCTGT GTTCAGCATT

164761 GTGATATGGA GGATATTAAG TTTGCTGGTA ATTTCTACAC TTGGTCTAAT AAGCAAAGTG

164821 GGGATGCCAG GGTCTTTTCA AAATTAGACA GAGTTATGGC AAATGGGGAT TGGAGAAGCT

164881 ATTATCATAC TGCAGAGGTG TGTTTCTTGA ATGAAGGAAC ATTTGATCAC TGTCCTGCAG

164941 TGATAAATGT TCATAAGGAG GCAGCCTCAG GAAGGAAACC CTTTAGATAC TTTCATATGT

165001 GGAGTATGGC TCCTGAATTT GATTGTGCTG TGAGGAAGGC TTGGGATGTC ACCATTCAAG

165061 GGGCTCCAAT GTACAGGATC ACTAAAAAAT GGAAGAGACT TAAGGTTGTC TTCAAAGATC

165121 TGAACAGGAA AGGCTTCCAA GACATTCAAG TCCAGGATGA GCAAGCTAGA CTTCACCTTA

165181 TGAACCGCCA AGAGAAGCTT CATGCTAATC CTTCTAATGA GTCTTATGCT TCTGAGGAGG

165241 TTGAGGCAAG AATGGCTTCC ATTTCTGTGC ATAAGGCCTA TCAAAGTTTT CTCCAACAAA

165301 AAGCTAAGCT AGATTGGGTT CGGGAGAAAC TGAATGGATT GGTTCAGCAG GAAAAACTAG

165361 AACTATTGGT TCATATGGGG ATGCAGATTC ATCGAATTCG GGAAAGAAGT GGGTGGGGCT

165421 GGGCTGGGGC ACAGAAAGTT TTGGAGTAGT GTGGAGTGGT GTGCGCGGTC TTGCCTCCTT

165481 TAGCTCTGGC TTTCTTCCTT CCCCTTAGGA TCAAGGGACT GACCCGAGCC TAACGAACCG

165541 ATCAATCAGC AAAGGTGGTA ACTGCCTTGT GTCCAGGGAG GGGGTGAAGA ACGAATTGAG

165601 CGACAACATC TGTCACCGTC TTTGATTATG CCCCGCCACA GGGAGAAGTT TGGTAGTTAC

165661 TGTGAGGGGC AGCATTTGCC ACACGCCTTT TAACCCGAGC CTGAAGCAGT AAGGGAAGCT

165721 TCTCTTTGAG CGAAGCAGTT GCTCTTGCCT CGAAAAATCG GCTAAGGAAG GGGTAAGTGT

165781 TCCATTCCTC ATGCATGGCA TGGGGGGATC TTTCCATGAG AAGAGTGTGA TGTGGCTTCA

165841 ACCCCACGAG AAGGGCCAAT TAGAATAAAT TAGTGGTATT AGTATGCCTT TCCTTCTTCC

165901 TTTTTTGCTT TGCTATACCT TTACTGCTTG ACTTCCTTTC TGACTTTCTT TCCATTTCCT

165961 GCCGGTTGGA GGAAGAGACT CAGCTGTTTC AGCCCCGTTT GTGAAAGAAG TGAAGTCTAC

166021 TTCCTTTTCT CTTTGATGGA CACCTCCCCT TTTGAATGTA CTCGAAGCAA GATGCCCACA

166081 ATCAGATGCT ATAGGAACGA ACTGAACTTC GAATATGTAT AGCAAGATCT TCAGTCTGAA

166141 AGCTTTCCCC TAATTACCCA ATCTGACTCA ATAGGAACTG CACTTAGACT TTCCTCTATG

166201 GCTTCGCATG TCTCCCTAGT GGGCGGAGGG AGCGAGCTAT AGTCTAAAGA AAGGAAAGAA

166261 GCAACTCACA TACTGATGAT ATGCGCTAAA AGCCTAAAAA GAGAGCTAGT GTCCTACCTA

166321 AGTGAACCCG AAGCGAGAGC ACAGGTAGAG CCCGTTTCTT TTTGTGACCA AGGATGAAGT

166381 AGATGTATAT TTTGTTCCCG TCCCAAAAGG AGCATTAGCA GGCACGTATC GATGTGCAAA

166441 TGATGAGCAA TTTACTCTTT TCACGAGTAG GCTGCTGTTA GACTGTTGGT TCTAGGTTTG

166501 ACACATCTAT TATCATTCTC TTCTCTTGCC GATATCGACC TTCTTTTTGT TGGCTTTCTT

166561 TCCATTTTTA GTAGAAAGCT CCCCCCCGAC TACTATACTT CGGTCTTCGA ACCTTTTTGA

166621 ATATATTATG AACACAATTT GCCAAGAGTT GGTTGTGACA AAAGTGATTG GGATGCCCAT

166681 CTTTGGTCCA GAAGGGGTTC TCTATGAAAA GAGTTTCCAC CTTTCAGATG AGATACGGGC

166741 TGCCACTCCC CCCGGTGATA GCTAGCCATC CGCGTCGAAC ACGAAATTAA GTATTCAATA

166801 TCCGATTTGA GACACGTACC ATCTTTGAAG ATTCGAGGGT GACATATAAG AATTGATTTG

166861 GGCTGTGACA GAAGTGATTG GGTTTCATTC ATGCATTCCC CTCTTTGGTC CAGAATGAGT

166921 GACCTATTAG TAACAGAGAG CGGCTAAGAA GAGGAGGTTG TTGATGTAGT TTTCTTGATT

166981 TCATTGAGAT TGGGTTGGTG TCATTCTGGA TCTACATTGA TTCTGTATCT AGTAAAGCCA

167041 ATGGGCGCAG TCATATCTAA ATTTTTCTAG ATCATTATTC TAACAACTTT GTCATAAAAA

167101 GTTGTCATAA AACCTATCTC TCTCTCTAGG GGTGCACGAT AAGCAGTGAC TGCTATCGTA

167161 CGCATCTCCT CCATGGGGAG GAAGAAGAAA GCTACTCCTC GATCGCTGGT TCCTGCTGCT

167221 TCAATTACTC CTTCTAACTC TCGTCCTTCT TTGGTGTTAC ACAATGTCTC AAACCCTAGT

167281 CCCTCCACTC ATGATGTTTT GCAATCCACT GAAGTTCATC CATCTGCCGG AGCGATTTCT

167341 GCCGCCGATA AGGAGAATCT CAGACTGGGT AACGATTTCT TGCGTTCTGG TATGGATTTG

167401 GCTGCTGTTG ATGGATCCAC CCATTCAGAA TCCAATGGAA CAGTAACCGC CTCGTCCAAC

167461 CTTCAACAGA GGATGAATGT GGTCACTGCA AATGCTCAGG CAATGACTAC AGATCTGGTT

167521 CCACCACCCT CCACTGACCT TCCTGGTGTG CCTAACCCTT CGTGGGCCTC TGTAACCTCT

167581 GGTGCTCAAC TTACCGCCAA AGGTACTGCT CTTAAATTTG TTTCCCCTGC GTCTATACTA

167641 GACGCTATTT GTCTCCAAGG ATACTGATCC CTACGGGCGT TATTCAGCTC TATCGACTCT

167701 GTGCCCTACG GGCCCAACTT GAAAAAGCCT GCGTCTCTAC GAGAAAATCC TTTCAGATTC

167761 TCCCCGGCGC AGGCTCTTTA GAGTCAAGCC CGATAGGGCG CAGGATCGAA GAGTTAAGTC

167821 TTGGTATCTG CGCCGAAAAG GAGAAAGAAG GACAAACCGA AGAACAAACA AACAAAAAAG

167881 GAAAGAGTGA TGCCCACAAG AGAAAGAAAT TTCCTTGTCT CGTTAAGGAA GATAAGAAAG

167941 GTAAGAATCC GCAAGTCTAG TATCTGCACC GGGAATGAAG AAGAGACAAA CACAGGTCCG

168001 GAGATGAGAA GGATGGGCAA GCCAAGCAAG GGTCGAAGTA TTCCGGTTTA CCGGTAAAAA

168061 TGCTAGGCAT TGGATTTCCG CTCGTAGATG ACAAAACCAA ATCTTCTTAA TTCCGTTTTA

168121 TCGGGAAAAA AGGCAGGATC TTTGAAAGAA CCGAACTTAT TGTTCTTGGC TTCTCTTCTC

168181 TTCTTGCCTG TAGCCACATT TTAAGCAACA AGTAAGGGGG TATCAACTAA ACCCAATTTC

168241 GGAAGTTTTA TCCTATAAGA ATAAGAATTG GCTTTCCTTC TGTCTGTAGC TCTCCTCTCG

168301 TAGCTCGTTC TATTCCCTGA AAGGAATAGA GTTAAGGGAA GGGAGACCTT CTCTGTATTC

168361 TGTAGCCAAT GTAGCTTCTG CAGTTCCTGC TGTGCCTGTC CCTAGAGTTT CTATGGGTAA

168421 TCCGTTTGAG GTGTTTGTTG CCCAGAGGGG AAACTGTGTT TACTGATCAG GATAAGACTA

168481 TTGTAGATGA GGGCGTCTTC GAACCTCTGG TGCAGGATGA AGTTTATCTT CTGGAATGTA

168541 AGGGGCTGTA ATAAGCCCTT TAAACAGAAA GAGCTCAAAC TCTTTATGCG GAAACTCTAT

168601 TTTTGGCTGT TTGTAAAATT AGAACTAAGA TTTGTGGGAA TTGGCGGGCT ATCCATAACT

168661 ATGATCATGC TGCTAATGGT AGGATTTGGT TGTGTTGGGA TCCTACTAAG GTAGATGTGA

168721 CTCCTGTTTC TTCCACTTCT CAAGCCATTC TCTAACCCTG AATATGAATA TTCTTCCCTT

168781 TCTCTAATCT CTAACCCCGA ATTCCTAGCC TACACCCGGA CTCAAGACTG ATTAAGATTA

168841 GTAGGGGTCT CCATTCTTTA GCTAACTCGT CGCTTTAACC GTGAGGATCT GCCCTTTCTT

168901 CTTTACTACG GACTAATTGA GTCTCCCTAA CTCGTCGCCT TAACTGCTAT TCCCTTCCCT

168961 TTCCTTTTAG GGACGGACTT TCTCTTTAGG TTCTTCCCAG CCTCTTATTA AAGAATAGGG

169021 AGCTAGCTTC TTGTTATTCT AATGACTCTA TCGGATACCG GGCCCTACGG GTAATATGAA

169081 GTTCTGCCGC CACTTCGTCT ATTGGCTCGA CTCTACCGAG CCCCCTTCTG CAGCTAGAGG

169141 ACTTAGTTAG CTAAAGTAAA GTGCAGCTAC TCTTTCCGAT TTAAAGAAGA AACAAGTGAC

169201 CCGGACTTCG GTGCTGATCC TCGTAGTCTT ACCTGTAATT AAAGAAGAAA GAAACGAGCT

169261 TCTTGTTCTT GGCTTCAATG ATTGCTTGTA GCCACAATTC CAACAGCAAG TAAGGTGATA

169321 TCTTAACATT TCGGAAGTTT TATCCTATAA GAATTGGCTT TTCCTTTTTC GTAAGTTTTA

169381 TCCTATAAGA ATTGGCTTTT CCTTTTTCGT GAGTTTTAGC CTATAAGTAA GAATTGGCTT

169441 TTCCGTTTTA TCTTATTAGG GGACAGGGAC TTACTCTACT TGGGGGACAA GGACTTACTC

169501 TACCTCTTAA ATCCAACTAA GCCGTAAATC CGACTAACCG ACGAACTAAA GCAGCTTATT

169561 GGCTTCATCT CTTGTCTTGC CCGTAGCTTC AATTCGGGTA GCCGGTAAGG AAGGTGATAG

169621 CTTAACTAAA ACCTTTTTCG GAAGTTTTTT CTCCTACAGA ACAATCGATA GATGTAAGAT

169681 ACCCGTACCT TTACTCGGCA TTATTCCGTA CTAAAAGAAT AAGAAAGAAG ATGGAGTCCG

169741 TTAGGTTAGG GAAAGAAGCT AGTTTCCTAT TGACTGGGTA GAAAAGGATT AAGTCCTTAG

169801 AAAGGCTAAA AGTCCTAAAG ATAAAGTCCT TTTATACAAT TATGAACTTT ACGTAACTTT

169861 CTCAATTCCA ACCCAATTTA TCCTTCTCTA CCTGGTGATT CAGTAATCCC CGTATTTTCT

169921 TGTACTGGAT GGGTTACTTC AGCGGTAACT CCCCGCCACG AAAAATTATG ACGTATATTA

169981 ACCCTGTATT TGAAAGCCAC TCGGACCAAC CTTCGTTGAT CCCGCCGGTG GTAATACAGG

170041 GCTACGAATA AATAGCTAAG ATAAGCTATT CCTAAAACGA AAACAGCTAA GATAAAGTTC

170101 TTGTCCCAAA ATGTAGTAAA AAAGTCCACA AACCCCTGTA CTTGATCGAA GGGAGTGAGT

170161 CCGTTGACTT GTTCACCCTT CTGATTTGGG GGGTTGCTTT GTCCGATGAA CAAACTCGTG

170221 GTATCATAGT GGAGGAAATC AAGGGTATGG AAACGACTAA CAGTAGGTAC TTTAGAAAGG

170281 TAAGATCCAT AAGTGGCACT CTCTTTTTCT AGTTCCGCTT CTTGCTCAAA AATGAAGAAA

170341 GACTTTTCGG AAATCACCGG TTGGGTTTTT TCCAACCAAG AAAGGCATGG GAGTCTTTGG

170401 GCATTGCTTT CGTCTCTTAT TCCATTTCTA GTTGTATGAA AAAAGTGATC CTAAAGGACT

170461 TCTCAAGGAC CGAGGAAGTG CTATCGTGCT ACTGGCTTTT AAGCGGATTG CTACTGGTTT

170521 GTTGACAAAG CAAAATGAAA CTTCCTTCCA TCCTTACTCT TTTTCTTATT TAGAAACCTT

170581 CCCTTGCTTC CTTTCGCACC TCGTCATAGC CCTGAAAAGC TCACTCTGGC CGGACACCTT

170641 ACATCTATCC CTATATAATA GAGGTCTACG TTGTGTCGTA ACAAAGGCTG TTTGTGATGG

170701 ATCAATCAAA ATAAACTCAC CAAGAAAACC TATTAGCTAT GAGCTTAGTG AGGCACTTAT

170761 TAATGGTGTT ACAACATGAA ATGAGTCTGT AATTACTTGG CTTTGTGGCA TTAGGGATCT

170821 TGGGAACTTT AGCAATAACG GTATATAAAA CCTCCCTAAG CAAACTGCCA GAGATGAGGC

170881 TCCAAGCAGC TCTTAAGCTA GCAGCACAGA AGAAAAGGAT GGGCAGAATT TACAACAGGA

170941 AAGTAAGGCA CAGAGGTGAG AAGTGTTTAG ATTATCGATA CGAAGGTACA AAGTGGATTT

171001 CTCATGGCCC TCCCAATGAA TCCTTTTTAT GCTATACGAG CATAAACAAT AACCATTTAT

171061 TTAGAAGACC TGCAGGTCGA GGTAGTTTCT ACTTGCTTAC TTATATAAGT AAGGATGAAT

171121 GTTCGCAATG AAAAAGAAGA AGGAAAGCAG ACTTCGCGGC CCATTACCTA TTCCTTATGA

171181 CTTCTAGTGC TCTTCTAGGC AATCTTTAAG CAAAAGAGAA TGCCCAACAC TGCTTTTTCT

171241 CTATTCCCTC GGATCACGAT TTATTGCTTC TATTAAGAGA TGGGATAGAG GTTTGCATCC

171301 CTGCTAGAGA TTGTTCCGGA AAGCAGGAGT CAAGATGTAG TAACACCCTG ATAATAGAAC

171361 TCAGACTCTT TCTCAACCTG GGGTTCATTC CTGTTCGTTC TTGAAGAAGA GTCAGTTCCG

171421 AGTGCCAGGA GTGGGATCCC CTAGCAAGAG TTCACCACTT TCCCAAAGAA GATAGAAAGC

171481 CTGCTTCATC TTTACTTCCT TCCGTACCTT ACTTATTCTT AGTCTGCTCT AAAATCCGCC

171541 AGTGAGTCGA TGTCTTATGG AGTGAAATCC TTTTCGGGTA ATGAAAAGGT TTCAGCTCTG

171601 GTTCAAATGG TATCTGTGGT ATATCTCTTA TCTCTTGTTC ACGAATCCGT TTCAGGTTTT

171661 CAGGCATACC CGGTATTTTC TCTTTCTCGG CTTCGGGGAA AGAAGTTTCA TTGGGGAAGG

171721 TGGTATCTTC TAGTTGATCA CTGAAGTTCC TTACAAGGAC TGATCTTTGC TTGAACTTAG

171781 CCCGAGTAAG GCCAACTTAA AAGAAAACTA GGTGCCAAGC CTTTCAAACA AAACCATTTC

171841 TTTCTCTCTG GGAATCATAG TGAGAGTGCT TGAGCTTGAG AGCTGGTAGT TCACTCATCC

171901 GTGTAACTAG TTGAAAGGCC AACCAGTTAT CGATGTGGTA AGATGTCTTA TCTAGCGAAA

171961 TACCTTCCCC GAATTCCTAT TTGTTTGTTT GTTTGAAAAG AGTACCTTAA GTTCGAGAGT

172021 CTGGGAATGC AGCTCTCTTT CCGACATCTA GCTCTTACGG AACCTTTGAA AGAGGAGTTT

172081 TAGCTTTTCC TCCTATCTTT CTTAACGGAT TCGTCTCTTT TGGCCTATCG GGTTGATAGA

172141 CACTGGTTTT CCAACCTTTC TTCTTCTGGT AGCGCAGAGA GTAGCCAACC CAGTCAGCCA

172201 GTCCAGTAGC ACGGTCTCGG TCCTGTAAGC CAACGGTTGC TAACTTTCTT TCAAATAAGA

172261 TCTGTCCCAG CGGTCAGTCT CATCGACTAG CATTATTCTT TCTTTAAACC GCCTTCTCTT

172321 GATGTAGAAA ATCGTTTTTG AGGGAAATAC AGAATTAGCT CTATCTTATC CAATGGGAAA

172381 CTTTCGAGTT CATCCTTTAG CTGTCCAGGC AGTCCTATCA GTGCAGTACT TGTCTGAGGA

172441 GTGCTTCCTC CCGAGCCAGT AGGCCGATTG GTGTATAGAA AAGAACCTTC CCAGCCGGAC

172501 GCGTATCCAG GACCTGCGTA TTGGGGAACC TAGTGGGACT GCTCTGAAAC TGAAAGTTCC

172561 AATGTTTTTT TTTCAGTCCG GGGCTGCTAA GAAAGCGCTG GAAACTCCCA GTCGATGAGG

172621 GAAATGGAAA AAGAAAAGAG AATGAACCGG TTTGGAATTA GGTCTTGCTA TATTACAAGC

172681 TCATCCTCTT CTTCATCTGG ACCTTCAATC TGACTCTACC TTATTCAATT CAAGTAGCCT

172741 GTTTTCGGAA TAGTGCTAAC CTTCCTAGAA TAGTTGTCTT TCGATATAAT AATCGAATCA

172801 GGCTTCTCTT CGAGCCTTTC TATCCCTTGA TTTAGTGAAG GAGATGGCTA GAATAAAATA

172861 AGCTATGATA AAACGAACTT GAAAACGAAT TGGCTTTTAT TTTAGTAGGG AAAAAGGCTT

172921 ACCTTGCCAC TCTAAGTACA CAAAACCCGC ATTGTTGAAA GGATGTTCAA ACCATTTTTT

172981 GGTAGCTTTT AGGCAGTGTA AGCCTTTGTA TTCTGTAAGA GCAAAAGCAT CTTCTGCAGC

173041 TTCTGCCCCC CGGGAGAGAG AACTCCTAAA CTCAACCTAA GGCAGCCTTT CTATTTCAAA

173101 GCGAGACCAC CTAATTCAAG AAAGGCCAAG AGCAGTTGAT GAAAGATAGG TTTGAGTGCC

173161 CGTTCTTCTC GAAGCCGGAA ATAGGGCTTT CGGAGACCTT CTTCCGTCTA CCCTTCGCCT

173221 AGCGGCTAAG CTCGGAGACC CAAAGTCTTT CGACTAAGCG CTTTGAGACG ACCTAAGAGA

173281 ATGAGTGGCT TAACGCTCTA ACGGCCGGGA CAAAGCCATA TCTTTCAATC TCGTATCTGA

173341 CGGAAGTGCC TGAACTCCTT CTTTGGTTTG GAGCGAAATT CCCTCAAAGG GGATGGATAG

173401 GTTTCATTGA GTGCCTTACC GGAAAGCGAC GATCTAAAGG AAGGGCTCTT TAGCTTGCTC

173461 CGAAAGAGGT CCCCTTCTCC CTTAGCTGCG AGACCTGCTC AATCATAACA TTGGGTATGT

173521 AGGTCCAGCC GAGACTATGT TCTACTGACT AAGTGCAGTT GCCTCAATAG AAATGTTTTC

173581 CCGGGGATCA AAGACGGAAT CTTTCTCATT AGACCGGCGA GGATGCCTGA CCAGGGTTTA

173641 GATCTTTGGT CAATCCATCA TTGGCTAAGC CATTTCTTTC TATTTCTTTC GGACTTGGCC

173701 GATGAACAAC TAACGTTGCC TCGATTCTTC CCTTAGTCTA GCAACTAAGC TCTTCGAACC

173761 TGTGTCTATA AACCCGGGTC TTCAAACCTT TTCAATCAAA ATAACAAATG AAAACATTAT

173821 ACCATTCCTA ATATATAGTA GCGTACTGGA CTCCATCTAC ATAAGTAGAA GCATTCAAGA

173881 ATCACTTGAC AGTTCTTATT TCCATTTTCC GACTCTCATT TTGTTAACTG ACTTAAGCGC

173941 AATACTTATC CTTAGCATAT ACTATACTAA GATCTGCGAA CCAAAGCAAA GACAGGACAA

174001 GTTGAAAGAG CTTCGGTAGT TAGACTTTCT GTCTCGCGTA AGAAAGAGAG TTTAGAGTGC

174061 CATACAAAGA ACCTTAGATA AGGTTCCCAT TGCCTGAAGT GAAGAGTCAA CCTTCCACAC

174121 AAGGAAATCT TCTGATAGAG GGAGAGCACC CGACTTGCTT GTTGACACGT GAGGGAAAAT

174181 AGGAGTCTGA GGTGGCAGGA TTTACCACTC AAGCCCTATG GTAGTGATGG TTGGTCCCAC

174241 TACTCCTTCG AGTGCCTTTT GCGCTTAGCG TTGGAAAGAG GTACTTCTAC AGCGAAGGTG

174301 CTAAAACCTA AAACTAGGCG AACTGACTTC GGAAACTTAA ACGAATCAAT TCCCACTTGA

174361 CCCATTCTTC TGACTGCGCT AGCATCATCG GAGACGGCAA CAGAGATTCT TCCAACTTCG

174421 CTCTCAGAGG CGAGCTTGTA GACTATTGAA TTCAAAATCA TCGCCTTTTT GATTTCCTCT

174481 AAACCTACCG TGTGCCTATT TGGAGCTTTT CACAGTCACG TTTGTCGGTG GCAACATCGG

174541 CATGCCTTAT AGAAGACTTT AAGCGCACCT GAACTACCCA TAGTTACGGG GTTGCACTCA

174601 ATAGTCAATC AATTCGTTTT TCCGTAGATT GATGTTTTGT ATCGCACGCT TGTTCTATTT

174661 TTTTTTATAG TGTTAGAAGT ATAACTAACT GAAAGCGCCT ATGAATGAAT TCCAAGAAAG

174721 CGGCCGGCTA GAAAGTGCAA TCAATACCTC GTGACTCCTA TGCAGACAAT AGCTACGAGC

174781 TGGATAGACT TTTCTCGAAA TTGCGTATAT AAAGAAAAAG AGATTCTGAA TTGATTGCAT

174841 GGTAAATTCA ATGTTTTTGA CTGAACCTCC CGTTGTTATC TCTCCGATAG CGCGCAGCCG

174901 ATAATAGAAA CCTTTTTTGA TTTGCCAAAG AAAGACTCCC ATGCCTTTCC TGGTTGGAAA

174961 ACCCAACCGG TGATTTCTGA CAAGTCTTTC TTGATTTCTC GAGAGAGCAG AGCAGTCAAA

175021 GAATGAACCA AATGACTCCT CCTGACATTC TCAAGTTTCT TACCGACATG TGCCAAGAAA

175081 TTGTAATTAT TGCAGGGGTA GCGGCCTTAC CGCTTATTGT ATTGATTATC TTTAGGGCTG

175141 GCAGTCTTAG GGGGTTGAAT ACGGAAAATG CCAGCGAGAA ACTATTTGAT CTTTGTTCTG

175201 ATACAATCAA AGAACAGATC AAAGATCAGA TTAAAACCTT GCTGGAACTC TATTATACGA

175261 ATTCATCTGG ACCTTTGCCC TCGAATCGTA AGATTCAAGA CGCAGCAGCC TTCCTCCATC

175321 AGGATTCAGA ATCCTTGGAA CAGCTGCTGC CGATTTGGAA AAATCTTACC GAATTGGGGG

175381 TTCAAAGTCC AGAGTTTATG CAAGTTTTGC TGTTTCTCTC AGCATCACAA TAAATCATTC

175441 TAGTACTATG TTTTCTGTTA CCGATCATTT AGCTTTACTC GCCGCTCTGT CATTGGCAAA

175501 GCAATTATTT GGTTATGCCA TAAAGGCTCT TCTAGTAACA GCATTCCTGT GCGTTTTCTT

175561 TCTTGTGGCT AAGGGGGTGG GTGCGCTTTC CTTATTTTAT ACTTATTTAA CCAAAAGCGG

175621 CCTATCGGTC TTAGTACACG TTTTTGTGAA ATCGGCAGGA ACAGGTTTTA AGGGGGTAGG

175681 CCTTCTCTTC CTGGGAACTC TACTCCGCTG TTACTTTAGT CCTAGTTCAA TGATCGAACC

175741 GTCTGGTTCT GATCTCCCCG ATTTAAACGC CCCGGCTCCG GAGCCGGAGG CTACCGTGGA

175801 AGAAAATAAA TTGGGAGGGT CCGACAGCGC TTAGAAGAGT ACACGCTTTT GGTGGGCCCA

175861 CGAGACACTC AACCTCTTCC GTCTTTTTCC CATTCCTTAA TCAAAACTTT TGGTTTAGAA

175921 GAGGGAGTAT CTGGGCGGCG GTTGCAAGCC CTTGACGAGA TACTTGAGGA AGAAACCCAT

175981 AGAGTGCTGG AAGGCGGCTC TCCCGGGCAT ATGAGCGGCC TTCTACGGGT AAAAAAAAGA

176041 ATGGACCAGT GGGACTCAGA AAATGGGAGT TACCCTCCCA TACCATAGGT TGGACTCCTG

176101 CCCGAGCGCG GCGGAAACTT TATTCTTCGT CATTATCGGC AGCGGCATTT TACCTGAAAA

176161 AAATAAGATT TTGGAATCAT GGAATTCTCC CCCAGAGCTG CGGAACTAAC GACTCTATTA

176221 GAAAGTAGAA TTACCAACTT TTACACGAAT TTTCAAGTGG ATGAGATCGG TCGAGTGGTC

176281 TCAGTTGGAG ATGGGATTGC ACGTGTTTAT GGATTGAACG AGATTCAAGC TGGGGAAATG

176341 GTGGAATTTG CCAGCGGTGT GAAAGGAATA GCCTTAAATC TTGAGAATGA GAATGTAGGG

176401 ATTGTTGTCT TTGGTAGTGA TACCGCTATT AAAGAGGGAG ATCTTGTCAA GCGCACTGGA

176461 TCTATTGTGG ATGTTCCTGC GGGAAAGGCT ATGCTAGGGC GTGTGGTCGA CGCGTTGGGA

176521 GTACCTATTG ATGGAAGAGG GGCTCTAAGC GATCACGAGC GTCGACGTGT CGAAGTGAAA

176581 GCCCCCGGGA TTATTGAACG TAAATCTGTG CACGAACCTA TGCAAACCGG GTTAAAGGCG

176641 GTAGATAGCC TGGTTCCTAT AGGCCGTGGT CAACGAGAAC TTATAATCGG GGACCGACAA

176701 ACGGGAAAAA CTGCTATTGC TATCGATACC ATATTAAACC AAAAGCAACT GAACTCAAAG

176761 GCCACCTCTG AGAGTGAGAC ATTGTATTGT GTCTATGTAG CGGTTGGACA GAAACGTTCA

176821 ACTGTGGCAC AATTAGTTCA AATTCTTTCA GAAGCGAATG CTTTAGAATA TTCCATTCTT

176881 GTAGCAGCCA CCGCTTCGGA TCCTGCTCCT CTTCAATTTC TGGCCCCATA TTCTGGGTGT

176941 GCTATGGGAG AATATTTCCG CGATAATGCA ATGCACGCAT TAATAATCTA TGATGATCTT

177001 AGTAAACAGG CGGTGGCATA TCGACAAATG TCATTATTGT TACGCCGACC ACCAGGCCGT

177061 GAGGCTTTCC CAGGCGACGT TTTCTATTTA CATTCCCGTC TCTTAGAAAG AGCCGCTAAA

177121 CGATCGGACC AGACAGGTGC CGGTAGCTTG ACCGCCTTAC CCGTCATTGA AACACAAGCT

177181 GGAGACGTAT CGGCCTATAT TCCCACCAAT GTGATCTCCA TTACTGATGG ACAAATCTGT

177241 TTGGAAACAG AGCTCTTTTA TCGCGGAATT AGACCTGCTA TTAACGTAGG CTTATCGGTC

177301 AGTCGCGTCG GGTCTGCCGC TCAGTTGAAA GCTATGAAAC AAGTATGCGG TAGTCCAAAA

177361 CTAGAATTGG CACAATATCG AGAAGTGGCC GCTTTTGCTC AATTTGGCTC AGACCTTGAT

177421 GCTGCGACTC AGGCATTACT CAATAGGGGT GCAAGGCTGA CAGAAGTACT GAAACAACCA

177481 CAATATGCAC CACTTCCAAT TGAAAAACAA ATTCTAGTCA TTTACGCAGC TGTCAATGGA

177541 TTCTGTGATC GAATGCCACT AGATAAAATA TCTCAATATG AAAAAACCAT TCCAAATAGT

177601 GTAAAACCAG AATTATTACA ATCCTTAAAG GGGGGGTTAA CCCACGAAAA AAAAATGGAA

177661 CTGGATGCAT TCTTAAAAGA ATGCGCAATT ACGGAATAAG GGATGTTATG CCTCTCTTTA

177721 CGGAGACCGG GCCCCCCTCC CCTTAAAAAA AGGGGAGAAA GCTGAGGAGA TCCAGTTTTC

177781 TTTTTCTTTT TTTTTATCTT TTTCTTTTTT TTCTTTAATT AATTAAACTA GGGTGAAGGA

177841 AGTGAAAAAA CTCTTTCACT CTAGCGGGAA GAAAACAGGT GGGTGAGAAT GAGCGGAGCA

177901 AGAGCAAAGC AAGTTCCAGT GGCGGGCTGT CTTCATGGTC CCTTACTCGC CGCTCTGTCA

177961 TTGTCTGATT TTTGGTTGTT TGATCACACT CGAAATTATG TATTTACTTA TCGTCTTTTT

178021 GCCCTTGCTT GGTAGTTCCG TAGCAGGTTT TTTCGGACGT TTTCTAGGAT CAGAAGGAAC

178081 CGCTATAGTG ACTACTACGT GCGTTTCATT CTCTTCGATC TTCTCTTTGA TTGCTTTTTA

178141 TGAAGTCGCA CCGGGAGCTA GTGCTTGCTA TCTAAGAATT GCTCCATGGA TTTCATCGGA

178201 AATGTTTGAT GCTTCTTGGG GCTTCTTTGG CGACCGCGAA GTCACCGGAT GAATTGCCGG

178261 GCAGATAGAT CAGATCCGGA CGCGGCTGTT GCTCCACGGC GATACGGACT CGACCCGCTC

178321 CTACCCACCA CGGAGCACCA TAGCATGTCG GGAATAAGGG AGGGCATACT GGACGTAACC

178381 ACTCCCTTGG CTAACTCTAT TTAGACTTTG AAATGCGGCT AGAGGGAAGA AATGAAGCCA

178441 CCGAACTCGT TTTGGATTGA CTGCTTAGTC TGGTTTCTGA GTTAGACAGA GAGATGTTGT

178501 TAAGAAGCAG AACCGGTCTT CCTACTAACA AGTTTTCTCT TCTTCTCAGC TCCCGGCGCG

178561 GGGTCGGTAG ACACAAGCCG AAGGCGCAGG GCAGCGCATA GCGCAACAAA CCAGCTAAGT

178621 CGTCTAGCTG TACTTACTTG CTTAGCTACC TCTAGCAGCA CTTACTTGGT TTAGCTACCT

178681 CCTACACCGA GTAACTAAGT CCTATAACTG CAGAAGGAGT AGCTGCACAG GCTTTAGCAA

178741 CGGGTTATGA AACAGAACAA AGCTTAGCCG CATCCATCTA ACAACTACTT TACTGCTTAT

178801 GCTTCTAGCT TCACTGTCTT TAGCAGCAGG GGAGAATCCA CGAGTCTAGT AGATACGCAG

178861 GTTATGAAAC AGATATGGCT TATGCTTATC CGGCCGGCAG CTGCACTATC TTTTTTATTA

178921 ATCCTCAGAA ACAGCTACGC TCGCGCCTAC CGTTTCACTC CGTGTAACTA TGCTCGGATA

178981 CGTTCGGAAG CCTAGAACAA GCTGGCTTCC TTCACTCCCA GTCTGGTTAC TACGTGAGCA

179041 TGCGTGGAGC AGGTTATATC TATTTAGCTT CACTGTCTTT CTTTAACAGA TATGGCTTAT

179101 TTAACAGCTG GTCTTACTAG CTTTACTGCT TAGTCTTATG CTTATGGCTT AGTCTAATAG

179161 CTTATGCTTC TAACTACACT ATCTCCGGAC AGGCTAAGCT CCTTCCGGCC GGACAGTATG

179221 GTTTTATTAA ACTAGCGTGG GTTAACGAAG TGTACTCTTA AGCTACGTAT CTGGTTTCTT

179281 AGATAGAATC TGTCTTAGTT ACATCGCTTT CTTCTTTATC TAATTGAGTT CTTTCTTCTG

179341 TAAGAGTAGT CTCTATATTA ATACCCAAAT ATTCACTCTT TTCTCTCTCT CTTTCCTTCT

179401 GAGACAACTT CTCATTAAGA ATTTTATTCG TTGTCTGCAG TTTCATTAAC TTTTTCATTA

179461 GTGATTTGGC TACCGCTTTT CCAATGTTGT GATCTACCCA ACACATATCA TTTACTTCAA

179521 TGGGTAAAGT CTCTCCATCA GGTTGAGTAA TCCTCTTACT GTTCAGTTTA ATCCCCAAAC

179581 TGTAATCATA TTCTTTAACA CCGACAGTCA GTTTGTCCCA ATCAACCTTG AATTTGTTTT

179641 TGATTATTAC TTGCATCCTA CGAGAAGGGT TAGCGAGCTG TTCTCTGAAC CATGGAAGAT

179701 CGACCAGGTG TTTAGCAGCT CCTTTGAACT TAATTACATC TGTGTCTTCT TCTGAAATAT

179761 AGCCATATGC TTTTGGCGCC AAAAAGAATC CTTCTTTGAT TTTATCTTCT AATTTAAACA

179821 ACCCTAAGAC TTTGGAAGAT ATTATGTTAT CTGGAAGAGG ATTGGCAAGA ACGATACAGT

179881 CTGTGTCTGT GTAGTAGCAG TCATCCCTTG ATATAAATGG GTGCATGTAG ATCCTAGCGC

179941 ATGCAGTGAT TGCGGCGGAA AGTTGAACTG CGGAGTTCTT TGGCTGAGCC CAATGAAAGC

180001 TATCATCAGC CGTAACAGTA TGATAGGATA CCATGTATTG GTTTTCTTTA ATCGGATGAC

180061 AGCCAATGAA GGAATCTTGT TTCATCAAAA AGTGATAGCG CTCGCTATCG CATAACTCCG

180121 TTTTAGTGCT ATTTGGGTTA ATACCAAATC TTCCATAGAG TGAATGAATA AGGATTTTAT

180181 AAATAAACAA ATGACAAAGC TTCATTTCCC TCTTTCTTTG CCTGTAATCG ACTCTCGAAG

180241 TGATAATTAA CATATTCTTT GAAAGGGCTT TCCTTCTTCT CGAAGAGGTA CCCACAGAGT

180301 GGAATCACAG TGTAGCCTAG AGATTTAGCA TACTTTAACT CCTCGCTATA GTATACACCA

180361 ACAAAATCAC CTGTGGGGAA GAGAAGTGTA CCATCTTTTC CCCGAACGGG GAGAAATGGT

180421 TTTTTGACTG AAGAAGGGCA TGACACAAAT GCCTCTATAA ATCCAAATAG GCTATCTATT

180481 TCCTTATAAA CCAGATTACC ATCCCAGACT GGCTTACCTC CAGGCATAGG ATATTCTTTC

180541 ATAATGAACG GATAGAGTGA GTTCACATCA TAGTAGAATA GGTTTCTACC AAATTGCTTG

180601 TAAGCGTCTG TATGACCTCC ATAGTATCCA CTACGCTCGA AGAGACAAGT CTAGTATAGA

180661 CGCCGGAATG AAGGTATCTT CATTCCGATT AGGTATGTGT ATGGGGAATT TTTTATCATC

180721 GTAAAACACC TTGCGAAAGA TTTTGAGAGC CATAGCGGAA CAAGTTAGCA CGCTCACAAT

180781 GTCCACCCAC CTTGTAGTGT GTCCAATACA ACCTTTGGGC ATTTTGCATT ACACCCCCAA

180841 GAAGACGTAT GTCTTGCTCC ATATACTCTA ACACGCTATC TTTCATCTTA CCCACATTTT

180901 CGACTGTCAC ATCTTCATGA TCAATAGAAC CCTTTCTACC AAGACCAGGG CATAGACTCT

180961 CAGCAAGGCT ACCTAGCTTT CCAGGAAGCA GATGCAGAGA GTCTCGAAAG CTAAAGATTC

181021 TTTTATTACC CGCGTATACG CCTAATTCAT AAATTCTATT ATTTCTCATA AGAGGTTTTA

181081 GCCGGTAATT CGGGGCATGT ATTGCAAGAT GCTTCAGGAT AAAAATCCCA TCGAATCGTG

181141 AGAAGTTGTG GAAGTACACG GTTTGTATTG CTGGGTTTTG TTTAATAATC GAAATTATCC

181201 TATGTATAAA GTCGCTAAGT AACTTAGAGC TCCGCTTTCA AATACAAATG AAGAATAGTC

181261 TTCGCTGAAG TATGAATCGA TTCGACTATT GTTTTTGATG TTATCACCAG GATGAACCAT

181321 CATAACACCG GCAGCATACG GTTTATGAAC ATTCTCAAGA AGCAGAGTCT CAGTGTCGGC

181381 AACCAGGAAC GGGTTTAACT CCTTAGAATT GCATTTAACA GGAGTTATAC TGCTTTTATA

181441 TGTTTTCTTA CGATTTCGTA TCTTTTTAGC TGTAATCGTT GGCAAAGAAC CGACCTCTAC

181501 TTGATTATGA AGGGCCTCCT CCAGTTGTTT AGTTCTGTCA TCAGGGGATA CGGATAGAAT

181561 TTCTATCTTT TTACCCGCCT CCGTGTAGAA GCGAATACCG ACTCTAGGCA CTAGTTCCCC

181621 CACGTATGAC TCACCTTTAT ATAAAATACG ACTATAAATA TGACCCAAAA TCTCACCCTT

181681 TGGTAAAGGT GTACCATCAC CCAAAGTCAA TGGTATAGCC TTTCCTTCAA CAAATGATAG

181741 AAAATCCTCC TCTTTCTTCG ATGATACCTC ATCCTTTCCA TTGTCTAGAC TCAATAATAT

181801 ATTGAACTTA GAGTAGCCGC CTATCGCGGG GTAAGCATAC AGAACTAGTA GATCCAGCAC

181861 AGCAAGACTG AGGAGAGCGG TCTCCTGCAT TAGAATTCCA TGGCTGAATC TATGGCTTGC

181921 CACGATTAAG CTAGGGTGGG GACGGATCAC TGTGCTTTTG CCTATTACAC TGTACAACTT

181981 ACACACTAAC GAAGAAGATA CATTTAACCC AGTTGAATAC GACCTGTTGG TAAGAATTTT

182041 TTGTTTCATG GTGCTGTTAT TCTTTATTAA TGATGAATGC AATAACCCCC TTCCAAGTTG

182101 TTTTTGAATG CTTCCCCGTG ATTGACCCAC TTAATTTTCC CTTCACATAC ATAAGAGCAA

182161 TAGTTATGGT AGTATGTCTG TAAACGAGAT ACATTGCTTT TCCATACTTT AAGTCTCCTC

182221 GTATCATTTC GGAATTTCTC TGGAATATTG AATTCAAGGC ATTGATCGAT CATTTGAGGG

182281 GAGAATACCA TACAGTCGTC AATGAAGTGC TCATGAAGAA CACCACCAGC ATGGGGTTCA

182341 ACGAGATTTT GAAAGAAAAA AGCATTCACT ATTTTAAGGG GTGGTCCCAT TTCTTTAAAG

182401 ACTTCTAAGT AAAAGAGAGA TAACTTATTA CAAAATGGAG TTGTGCTAAT AAAGTTATCG

182461 TGAACTGTAT AAATAAAATA GGCCCACCAG CCCTTGTCAT TTTATCAACC ATTTTCATAG

182521 CAATAAACGC GTCTTTCTGA TGGATAAAGT TCACAAACAA AGGTAGAGAC TTCAGTCTTC

182581 TTTCTATATC TCTTTTCAGA AGAGACTCTA AGCGTTACCT TACGTCTTTT CTTATTTTTT

182641 CTATCATATA CCCAGAGAGA ATGGCTATCC ATTACCCTAT AATCCTGAGA TGTACTAAAA

182701 AAAGAAGTCT CATACTGAAC GGGTCTATCA CAACACGTGG CAAACCACCC TATAATCCGG

182761 ATTAAGCGGA TCAGGCAGTC CATATGTGCT GTGCATATTT AGTAGCCCAG AACTTAAAAC

182821 AGAGCCGAGT TATGTGGAAG CACTCTTTAT GTGTCAGGTA CTGAGTGAGC TCGCCTTTGA

182881 TATCATCGCG GGTGCTCATC ATAGTTTTCC CATAAATTAG GGGCATAAAG ATACTCTTAA

182941 CAAGCTTACG ATCAAACTTA TCCTCTATAA TCGTATAAAC TGATTTATCT AGTTCATCCT

183001 TAAGGAAGGA CTTCAACTCA GCCATTAAGT ATGAATATAT GTCCAGTATC CTATAATTCA

183061 ATACGAGATT GGTTCTCGCT GCCATTGTTT CGTCCAACAT GAAATAACGC AGAAGTTGAT

183121 ATGCACTTGC TGAAGCATCC TGCCTGGGTA ATAGGGGTAT TATATAAAGT ATTAGCTCCA

183181 AATTCAATTC CCCTTCATCA AGAAATCTAT ACATAAAAAG AGTCAAAGCT TTTGATATGA

183241 ACTGAAAAGG ATTTTTAGCC TTTACACCCC ATTCAGTTAA ACAAGTAAAC ATTTTTCTTG

183301 CATCTATATT ATCATTAATA TCCTTTGCTA TTTTAGAAAG ACCATCACTC ATCCAGTTAG

183361 TGGCATCTTT ATAATTATCG AATGATGATT GATAATGAAA GGCCGCAGCC GCGTAATGGG

183421 TTTTTTCAGC TTCCTCACTA ATCAAATAAC CTTTCTCATC GCCGTTATCA AATAATATCA

183481 GGCTTCGAAC AAGATCGCAT TCATGAAAAT TCAACCCACC GCAGCGGTAG ACTCTCCCTC

183541 GGAAGTCAAG AAAGACTGGT AAATAAAATT TATAGCCCCG GTAGGCTTCA GCCATATCTA

183601 ATATTCTTTG CTCATAACGA GCGCGCTGGA TATTAGTTGA TAATACCTCT AATACCTGAT

183661 TAAAAGTACA TATACCTTGC ACGGCAGTGT TATCAACATA AAATTCTCTA AGCAACTTAT

183721 GTTATGCAAC CGCTCATCAT TCATATTTAG ATAGTTAAGA AAACGAGGCC TGATAAGACC

183781 CTTAACAGCA TACATCGGTT CCTCCCTAGT AAGATTATAG AGAAAAAGCT CATTGATCTT

183841 AAATGCCTGA TGCTGAAGTT TGTTCATTAC ATTACACACT ATATTTGCTT TTTCAATACT

183901 CATATTATCT ATTTTCTTAC CGAAGTAAAT ATAGAATTGG TTTTCGTTCC AAGAACTTAG

183961 TAATCGACAC CGCTCATAGA CTTCATTGGA TAAAGCTAGA AGGTAACCAC CATATAGATC

184021 AGTTATGTTC AACCAACTCT TTCTTATCGC GGCGTAGGTC ATAACCCCAA TCCACTGGCG

184081 GGTAAATCAT AGGAAGGCTT ATCTGTATTG GAAGAATAAC TGGATTTATT AAGCATTCAG

184141 CGTGAAGCGA TTTGACCAAA TAAAATGATT TATTCCTCTT TTTAGCTGTT TTAGATGAAT

184201 CCACCTCTTT GTTTACAATT CGGATCAGAC CCCTTTCAAC TAAGTATTCA ACTAAGGCGG

184261 TACCGAAGGG GTATCGTAAC TCCACAACAC CACCTGTTTT GGCTAATTCC TTTTTATGGG

184321 TACTGCCTGA CCAACCGGCT GTTGGGGTTG TTGACCCTCT TCAACCGGCT CTTGGGCCTC

184381 TTGGGGATGT TGAGCTTCTG GGCCTTGGGC TTGAGAAGAT GAACCTTCGG CGGCTTCGGA

184441 AAATACAGAA TAAAGATTAG GATTATCGTG CATCATCCCC GAATAGTCTT CACCTGATGA

184501 GTTAGAAGGT GAAGGAAGAA CCCCAAAGAC TCCAAATAAA GAAACTAGCT TTTGCTTTTT

184561 ACATTGTTTC TTCGATAAAG CAAAATCAAA ACAATGACCA ATAATAAAAA AAGAATTGAA

184621 AAATAACGGT TGAAACCTAA AAGAAACCCG AAATAATCCG AGGTTTTTGT AAAACTATTG

184681 TAAAGGAGAT TCACGAAGAA GTATTGCGCT ATTTACCAGT GAGTGGTATT ATTGAACTGA

184741 TCTTTTGGTG GGAGAATTTT GATTGGAAAG CTGCCTTATT CCTGCTTTTT AGGAAGAATA

184801 GGCCGGTCTT CCTTCTCCTC TATTGGATAG GTTCCTTCCT ACTCTATAAG GCAGGGGTGG

184861 CGGGCTATCT GCTCGCCGGC GGTCTGCTGG GAGACGTGGT CGAACCCTTT TTGGGCGTCT

184921 TCCGGCGGGG TGAGCGGCCT ACCGGGGCCT TCTGGGCCGC CGACCTCATT TTTTCCCATA

184981 GTACCAGATT CCGAGGAGAT TATGTCTCCT TACGTGTCCA CCCCCCTTAT GGAGGAAATA

185041 AATGGAACCC TCATTGAAAT GGAGCCGCCC CTGATTTCGG ATTCTCAACG CCGCGAAGAA

185101 ATCTCCCGAA TCATGACGGA CCGGTTCAAT GCCGGGACCG ATCCCCAAAA ACCTAAGGAT

185161 TCCCATATTG AATACCTGTG CGAATTAGAA AAAAAGCTTG AGTATGAACT TCGAAAAGAT

185221 GGGTTTACTG AGAACTCGAT CAACAAAGGC CGCTTCAGCT GGCGGTATCG AGCGCTTACC

185281 TCGGGGAATA CCGGGCGTTA TATCCGGGAA TATTCGATTC AAAAAATTTT AATTAAAAAT

185341 CAGATTCGCG ATAACGGCCC CTATAGGCGC ATATTAGCCG ATGTTAAGAC TGGTGGTGGT

185401 TTCACTTGGT AAAAAAACCC AGTTAGGGGT CTGGAATGGG ATGGTCGAAC GACCCGCAGA

185461 TGTAGGGATG AGTTGTCACC CGAACTGCGT TACCAAAGCG GTCCCCTGTT GGCGTAAGGT

185521 AGGTGTAGGT CCTCTCCCTC ATTAGAACAG AGGGTGAAAT ACATTCTGCC AGAATTTTGC

185581 TTCCCAGTGA AAAGAAAAAG ATATCAACCT TATAACTCCT CGGCCTGTAG GGCGACGTAA

185641 TCGAACGTAT CCAACACGTA TCACTTCTCT GAAAAACAGT GCAAAAGGTA TGAGTCCGTT

185701 CTTGGTTGCT GATACTGAGA CAATCATCTA CGATGGGAAG GTGTTCCAGC CTATTTCTCG

185761 GGAAAGGGAT TTCGAAGGAA AAGTTCATTC TCCTTTTGCT ATAGGTGTCA TGATTGTTCG

185821 TCCGTGTGTC CCGGTAAAGG AGAGTAATAT CGATTACTAC TACAGTTCTG ATTATCCGGA

185881 TAGAATCTTT CCGGAAAGAA GTACAAGGTG ACTCTCGGAC TTGATTCACC GAATAATCTC

185941 TATTATTAAA CAAAATCCAG AAATTCCGTC TACTTCCACA ACTTTTCTCG CTTCGATGGA

186001 ATTTTCATTC TGAGGCACCT CGTGCTGCAT AATGAAGAAT ATGAAATTAT ACCTCTTATG

186061 AGAAACCAGC GGCTATATGA GGTCGTAGTC TATTATAAAA AGCGTATGTT ATTCCGGTTC

186121 CGAGACTCCT TCAATCTACT TTTGGGTAGT CTCGACTCCC TATCAAGGAA TCTATGCCCA

186181 GAGTTAGGAA ATAAAGGCTC CGTTGATCAT GAGTCAATGA ACGTAAAGAA CCTTAAGGAT

186241 AAGAGAGATG AAGTGATCGA ATATATGAAG CAGGACATTC GACTACTCGG GGGAGTAATG

186301 CAGAAAGCTC AAAGCTTCTA TTTGGAGCAC TATAATATAG ATATAGTTAC TAAAATCTTC

186361 GAACCTCACT AGCACTAAAA ATCTTTCGTA TGAAGTATTA CGATGCAGAA AATAACCAAA

186421 TCCACATTCC AAATAAAAAT GCAGATAGCT TCATTCCGGC GTCTATACTA GACTTGTCTC

186481 TTCGAGCGTA GTGGTTACTA TGGTGGTCAT ACCGACGCAT ACAAGAAGTT TGGGCAAAAC

186541 CTGTACTACT ACGATGTGAA CTCCCTCTAT CCTTTTATAA TGAAAGAGTA TCCAATGCCA

186601 GATCGACCCA TACTGCATAT GGAATTCATA CATTGATAAA GTATACCCGC ATCCCTCCGG

186661 CAACTTCAAC TTCTCACAGT TAAACCATGA ATCCCCTGTC TCAACAATGA CTGCAGTGTC

186721 ACTTGTTAAC ATCTTCTGGA TATGCTTGCT GGAAAAGATG ACCCTCAGAG GCTCGTTAGG

186781 TTCACACTTG AGAGGCGGTT TGCAAACCAA GTCTAGTATA GTAGAAGGAT CGGAGACGAC

186841 GGTAAAGAAG AAAAGCTAAG GAGTATTCTA TCTATTTAGC TACTTCCTTT ATTAGCTTCA

186901 TTAGCTACAC TAGAAGAATC TAGTTTTAGA ATAGAATACG GCATTCCAAT TCAAACTTCC

186961 CGCGTCTATC TCCCTTCGCC CCTTCTTCTC TTATGGGATT TCAGTCTCAC CTTTAGCTTT

187021 GATTCCTTTC CTGCGTCTTA CGACCCAGCT CTTCGAGCCT TTTCAGATGA TATTGATATT

187081 GAAGAATCAG CGTTAAAAGA CAAAAAGACA GCTTTCCTTT TCAACCCTAG CATAGTATAT

187141 ACGTCGGTCT TCGCCTCTGA GTCTATCAAC TCAGTCTTCA AACCTCCATT AAAAGAAGGA

187201 TTTGGCTGCA GTCAAAGTGG CCTCGGAGCG CAGTGTTAAG GTTGTAGTTG TTGAACGCGC

187261 AACCAGAGAG GAGAGCTATA GGAACAAGAC TTTGTTTGGA CTGGACGCGT GCCGAACGAA

187321 GATCGTGTCT ATTTACGCTC AAACAATCCA TATAGGTGGA AAGCTGCAAG CTGCAATAGT

187381 TCCCTGCTGA AGCGGGTTAG GCGTCGCCAC GGATAGGGCA TCAAGGTTGA AATCCTTCTC

187441 CATTCGAATC TGTCTCAGTT CCAGCCAGGT ATTGAAGCGA AAGCAGCTCG ACCGATAGTA

187501 AGCAAATAGG AATTACCTTA CTAGAAAGCT TACCGCGAGG AAGCCCTCCA TTACACTAGC

187561 CTTAAGCTAA TGGCAGACAT AAGAAAGCAT TAGTCTAATA ACGGAAAAGT CATAAAGCTA

187621 AGGTCTTCTC CTGTCGTCAA TCTTATTAGT CGTTGTCCCC ATTAGCTGTA GAGCGAAGCA

187681 AGGCATTCCA GCTAAAAGCA GCAGCAACTA GAGCATCCCG TCTTCAGGCC GGGGACAAGA

187741 AAGCAAGTCT GAAAGGGCTA GCTAAGAGAG GGGCAGCTAG GCGGAAGGCA AGGAAGGCTA

187801 GCCCGGCAAC TGCAGGCTGT CAACGAAGAA AAGTTTGAAT TCCAAGGTTT GTTTATCTAG

187861 AAAAGCTAGA AGCAAAGTTA TGGAAGCAAA GGAATACAAA TATGAGATTT TGACGGAGGA

187921 GGAAAAGGCT CTTCTCTCTC AGTTTGGGCA TCATACTATT GAGGCAATAC TGATAAGAGA

187981 GACCGAAAGA AGACTGAAGT CTCTACCTTT GTTAACTTCA TCCATCAGAA AGATAGATGT

188041 TCATGCCTAG AAAACATACC AAAGTGGGAC TTTTGTTTGA CTTTTCTCTC TGGCTGCCAT

188101 GGCGATTTAG CGGTGTTTTG GTGACCTTCC ACGCTTTTCA ATCTTCATGG CGAAGAAGAG

188161 ACGGCCGGCA ACTCAACTCT CTACTCCAAA TCATGCTCGG GATTCAGCTC GTTCCTCTGG

188221 AGCTGGGGTT TTTGTTACTG GGTCTGGGGT TCCTAACTCT GAGATCCATG GTGGTGAATC

188281 CGCCTTCGTC GGTGGTTCAT CCCTCTGTGG GGGCTATTTC TAGAGATGCT GCTGAGATCA

188341 TTATCATTAG GGCGGGCTTC CAATGAGGCG TTGCTCTCTC AGGTGCGGTC AGCTGGCAAT

188401 GGAACAGTAC CTCTGTCTGG TTCTTCCAGA TCTGCTTCAG TCACTCGGAA TCCAGGTAAT

188461 CCCTCCTCCT CTTCGGTTCC TAGTGAGTCT GGTCGAGGCA CTGGTGAGCC TGTTGCGGGT

188521 AATGGGGAAA AGAACTGGTC TAATTTGTTT GAGGGTGTTC GTATGGCTAG TAAGGGTCGA

188581 AAGTTGGGTT TCATTCCCCC GGTTGTGAAG GATGGCAAAT CTGTTGCCTC TTTGCAACAA

188641 TCTGAAATTG CTAAGATGCA TTCTAAATGG GAAATGTCCT TGATTCTGTT TGTTGTTGGC

188701 TATACCCCTA CTATTGCTTC TGTTGCTCGT TTTATTGCCC AGAACTGGAA CCAGGTTCAA

188761 AAGCCTAATC TGGTTCTGCA TGAGGATGGT TACTTTATTG TTCAGTTTGT TTCTCTGGAT

188821 GACAAGAATG AGATTCTTTA TTCTGGGCCT CACTCTTTTT ATGGTAAACC TGTCATTGTC

188881 AAGCAATGGT CTGCTACTTT TTATTTTAAT GCTGAGGTCT TGAAAGTTAT TTCTATTTGG

188941 GTTCAATTTC CTGGCTTACC TTTGAGCTGT ATCTCTCAAG AGAAAGCACC GCGCCAGAAG

189001 GACTACATCG AGTTCTATAC CATGATCTTT TTGGGGGACC ATGAAGACAG CCAGCCCGTG

189061 TGCCATTGGA ACTTGCTCTC GCTCTGGGCA TTCCCACCTG CCTTCTTCCC GAAACACCAA

189121 TCTTTCTATG GTTCACGCAT CCCTTTTTCT CTCCTTTCCA CCTGTCCTAT CTTTTATTGG

189181 ATGTGTTCCG CATCTGGCAT ATGCTAGTGG ATTCCATCCG CTATCCCAGC TTCTCTCTTA

189241 CCTAAGCACT CAACCATTTT TTTCTCGATG CGAATGGAAT AGCGTAGCGT AGTTAAGTAG

189301 CCAAGCTAAA GTAAAGTATC CGGAGGGAAG GCATTTTTAT TACTACGAAA AGCAAAAGAT

189361 GTCCCACTAG TCTTCTTTCT CACTAGCCCT TACACTCAGT CTCAAGGAAA AGTTTTTACG

189421 ACTGGGCGGA CATACCGAAT AATCGGAGAG AAGGAATAGA CCCAGGAAGG GAAGGAAAGA

189481 AAGCCCCTCA ATACAAACAA TACAAAGGAA TTGTCCCCGG GCAGCAGGTA AGGTAATAGG

189541 AGAATTTCTC AAGGGCTTCT CCGATCGCGA ATGGGGCTCC CCTGCAACCT AATTCCTTCC

189601 CTCTCCCCCG AGTCTTAATC TCAAAGAAAG GGAATTGGCC CTGATACGGC TTCGAAGACT

189661 GTTAGGCATA GACTGGAAAG AAGGACTTGT TACATCCTCA AAAAAGTGAA AAGTACCTCA

189721 ACAAATAGAA AAAAAACTAA AGACAAGAAG AAAGTCTAGC CGGAATAAAC TATTTGACTT

189781 TACCTTTACC TACGCAATAA ACTACATGAA AGCAAGCAGA GGAAGCGGAG AGGTACTTGA

189841 GAGAATGGAG GGCAGGAACC CTAATCGAAA TAGAACTCTT ACCCACGGAA GATTAAGGGA

189901 CCTCCTCATC TCAGGCATGG GTTCCTCCCC AGCCCAAGAA TCCAGAAGAA AGGGTTGCCG

189961 ATCAAGCGGA AAAGGTAGCC ACACAGCCGG AGTATGATCT TCTCGGTCAT CTCAGTAAGT

190021 TTAAGTTACC AGCCCACATA TCTATCTTGG AGTTGCTGAG AACGTCTCCA AAGCATAAGG

190081 AGTTGTTCTT CAATTTCAAC CAAGAAGCAC AGATTCCCGC AACCCTGACG CCAGAAGAGC

190141 TGCAAGACGT GGTCTGGTCG AACAGATTAC GACCAACGCT GACCTTTAAA GAAGAGGACA

190201 TACCAAAGGG GAGGGATACA TCACAATAAG TGGTCGGTCG TCCGTTGTCT CATCATCAGT

190261 TGTCGAACCA TCTGCTTTGT TGCTCTAGGC CTAACCTCCA ACCTTGGTTT TGGAATGGAT

190321 TCCCTCTCCG AGCGGAGCCG GGCAAACCCC CTCCCTCATA TGCCTTTTGG CTAGCTTTTA

190381 CGGGTTGCTA CTTTCTAGCT CTTAGCTTTA CTACCTCTAT CGAGAAGCTC TCTCTCGCTT

190441 CAGGTTTGCC TAATCATTCG ATTAGCCTTT TCCTCCGCAA ACCACTTTTG AAAAAGGGCA

190501 TTTCCTGTGT CTATCAACCC AGCCAGATCT TCAAACCTTT CTTCGAACCT TTTGGTATGT

190561 ATTGTCCCCT AACTATAGAT CAGATCCGCC GGACGAGAAA CTCAATTCCG CACTGCTGCT

190621 GAGTCGTCGG ACTTATCCAA AAAGGGATTT TTAGAATTTC TTTAGATTGC GTTGAGGGAA

190681 ATCTACCAAA GCTAGGCAGA TAGATAGACT CCTTTCCCGC TGCTAAGAGA GAGCAAGAAA

190741 GAAAATCAAA TGATTGTTTT TTAACCAGCG CTCTCTTTTG AGTATGCGGG TACTAAGAAT

190801 CCTCTGACTA CCAACCAGCA GACATCATCT GGCTGGGTCT TGCCGGTATC AACAACGAAC

190861 AAAAACAAAA TAGAAACAGC AACTAACTAT GGCTCTTGGC CCAGACAACG TCCTAGGCGT

190921 AGAGGAGATC GGAGCAACAG AGAACGCCTA GACGATGTTT TTCTTCCTGG GCTGCAGTAA

190981 GTAGATCGAG AGGTCGTTCC GCCCCTTGTC CCCGAATATT GGTAATATGT TCTCATACAA

191041 TGTTGCTCCA ATCTGACCTA GCTGGCGAGC GATCCCAGTT CGCAGCAGAG AACAAGACAA

191101 CAAGCGAGCG TACCTTTGTT CGCTTCTTCT CCACCAAGCA CGGAAGTTTA AGGATAACTG

191161 TAGGTCGGTG GCTACCTAAG GAAACTCCGA TTCGATCCGC CCCCCGGCTG GAAGGCATCT

191221 ACCTCATCAC GATCACAAGG AGAGGTTCAC CATGATGGGG GGTACTTTCT TTTCTTTCCC

191281 TTCCAGAAAG AAAGAAATGC ATAAGGGACC ATCCTTTTGT TGCGGCATGC TCTTAAAATT

191341 TACGGATTCG AAGGGGGCCT CAGGCCTGAC TTAGTCCCGC TAATGTAGGG CTAAGTAGCC

191401 GCCTTTTGAA TTGAATCTTA ATAAGTAGTC TATCAGTGGT GCGAAGCGTT ACACGCCTTT

191461 TCAGTAAGGG AGCGAAAGGT TAGACCTTAG GAAGTCAGCG AACAGCGGTT CTTCTATGTA

191521 GGTATGGTGT TATCCCTGGA CTCTTTTAAC GTCGAGTGAC TTCGTAACCT TTGCGTAGCG

191581 TAGTAGAATG AAGGCTACGC ACCGACGCTC TCTTATCTAT TAGTCTAAGC GTCTTCGCTA

191641 ACTCGCTCGC CTACTATACT ATACCCTACT TAGCCCTACA TTAGCTTGAC AAGCTGCCCT

191701 TCCTATTGGT CTGAGGTGCG AAGAGAAAGA TCTCTTTTTT ATGACTTCAA TTTCTGGATT

191761 CCGACCCGGA AAAGTAAGCA GAGCCCTATT GATGAATGAA AGAAAAGGTT TCTGAGCCCT

191821 AGCCCTGTAA GCCCACACCT GTGTAGAGTA GATCGTTCAA CACCTGCGGC ACAAAGAAAT

191881 TTTTGACCTA TTGGTCCTAG TATCATAGGC GACCGAACGG CCGCCCCCTA TAATTACTAG

191941 ACCAACCTGC TATAATAATT CCATAAACAC CTAGCGAAGA TATGGCAAAC AAATAAAGTA

192001 GCCCTATGTT CGGATCTGAC AATACCATAC CATAATCAAA AGGTACAACG GCCCGAGCAA

192061 CCAGACTTAG CATAAATGTA GTGACTGGAG CCATCCTAAA AAGGGAGAAA TTAGCACTAC

192121 TTGGTGAAAT AGGTTCTTTT AGAATCAATT TCGAACCATC TGCTAGAGGT TGTAACAATC

192181 CGAACGATCC CACTACATCA GGACCCTTTC GACGTTGCAC AAAAGCCATT ACTTTACGTT

192241 CAGCTAGCAC TAAAAAGGCT ACTCCTAGTA GAAGTGGTAG AATTATTCCA AGTATTTCAG

192301 CTGGAACAGC TATGTACGTT TTCGATTTTC TATTCACTCA TGATCTGGCC TGGTCGACCC

192361 GATCATGATA TTTCACTCAT GATCTGGTCT GGTTGACCCA ATCATGATAT TGAAGGATGG

192421 GACCTTTTCT CGAAAAACTA TAGATTCAAG AATTACTAAG AGCAGGGCAG GGCGGCGGGT

192481 CACCCGTTCT TATATAATAA GTCTCTAATC AACGGGACGA TCGATGGGTT CGATTTTTCT

192541 AACTTCGAAA GAAAGACAGT TCTTTCGAAC TCCCTCTCTT TCTGTATCTG GGTTAGTATG

192601 TTTTCGAGCA TCCTGCGATG CTCGAAAACA GCTGCTCTGA GAGCATCCTG CTGTTCATGG

192661 AGCTGACGCA GCAAGTCAGA AACTTCATCC TCAGCGAGAG GCCGCTGTTC CGGCTCCACT

192721 GCGGGTAAGC CGGCCTCTTG GGCTGGAGGA TTCGAACCGC CGCCCACTGA ATCCGCGCTG

192781 GGAGAAAGGT CAAGAGACTT TCTCCAGCTT CCGCTACCAC TGCCACCCGA ATCCGTGGGA

192841 ATCATTGCAG TAGAAACCGG AATATTCGGG TTTCCACATA AATCGGAAAA CCCTACTAAG

192901 CTGACCACAA ATAGACTTTC CCAATGGGAC CGAACATAAG AAAGAAATAG TACATAACAG

192961 ATAAAAAATA CCCAATATAC AAAAAAATAA AAGCATTTCC GCCTTATTAA TGAGGAAAGA

193021 TTGAATATAA AACCACTAAA CAAAAAAAAT AAAATCAAGA AAATGAAAGT GTTATGCGAC

193081 AAAACAAAAT CAGAGCGCAA ACGGAAAAAG GAACCAGCAA AGAAAATCAA AAGCGAAGTA

193141 ATAAAATTTC TTCGAAATTG ATCAAGTTGA GGCATAAGAA CGGACTGGAT CAAAGAACTG

193201 AAAACATTTC CAATACCGAT AGCAGCTCCC GCTGAAGCAA TTGTAGCAGC TCCGGCACCC

193261 ATTGATTTTG CACCTTCTAA CATAATTAAG TCGATCATTC TTCTAACACT TTCACTAAGG

193321 GAACTTACCC TTTGTCTTCT GAATCTTTAC GATACAGAAA TGGCACAGGC ATAATCCTTG

193381 TGCCTAACCA TCCATATTCA ATGGAAGCCT AACTCCGCCC CTTTCGTTGC ATTAAAGTTC

193441 AGTACTTCTT TCACTTGTTT CTGGTTTGTC CGAAGGCCGT AAGCCCAAAC TGCCAGAAAC

193501 GAAAAAAACA GAAGTAGTAG GAGTAGAACA AGAAATTTGT CCTCTTTTAG CAACTTAAGA

193561 AAGAACTCTA AAAAGTCTAT CATAGGGTGG TTGGGTTGGT TTGAAAAGTC GTTGGATTTG

193621 AGTTTTAGCA AGGGACAAAA TAAATAACTA TATATAAATA GAATATACGT TATTTTCTAT

193681 TCGTCATTCT TTGTCGATTC TTCCCCTCTT CTTATAACTA ACAATTTTTT GTTTTAGAAC

193741 AAACTGGGCG TACTACTTCT CTTCTCCACC TTCTGTGAAC CTTGATTCTC TTATTCTTTT

193801 TGAGACTTTC AGAATCAAAA TTGGAAGTAT CACCTTTAGT TCTCTTATTC TTTATGCTAC

193861 TTGAACAAGC AAGATTCTAT TCCTCCTTCT TCTCTTACGA TATTTCTATG TCAATTTACT

193921 TGGATCACTT TCCTACTCCG ATAGCATCTC TGAACGGCGG TTGAGGGAAA GTCAATCTGG

193981 CAGCAAAAGA GGTAATAGCT AGGAAAGGTC CCTCTTCCTA ACTACAGATA GGGAAGTTGG

194041 CTGTTAGCTA CGTATGACTA CAGACCGTTG AGTGCTCAAT CATCACTTAA GAAAGACCTC

194101 CTAGCTCGAC TTCTGCCTCT GTATGATTCA CTCTTGTCTA TATGTAGTCT TGTTCGTTGA

194161 AGGTCTTTCA TAGCTCGATC TCAGTAATAG GAATGAAGAA GAGTTTCGCT ACTCCCATTT

194221 TAAATGGAAT TTCCCCTTAT CTTTACTTTC ACGCCTGTGA GATACATTAG GTCTCAATCA

194281 TAGCCCCCAG CCATAAAAGG TTTCAAAAAG GGCCTATTAA CGAAATACCA ATACAAAGAC

194341 AAGAAAGCTT CACCTTGCAG TAGGAAGGTG TTCGTTGCTG AGACGGAAAA ATCTAACTAG

194401 AAAGGGCAGA CTCAAGGCGA TGACTAGTAG ATTTTCCAGG AGTTTAGAAA GCTAACGAAC

194461 TATGACCATG GGAATTCTTT TTTAATAAAT AAACTACCTC ACCCTGTAAA CCCTCTTGCC

194521 CACCACTAAT CACTCTGTTG GTTAGCTGGG AATGAATGTT AACCAATTTT CCCTACCTGC

194581 GAGCGAGTTC GACTTCTAGG AGTTAGAGTC CCTAAGTAGC AAGAACAAAG TTTAGATGTA

194641 GGATTGTTAC TACTACTTAG GGAGTCTGAA GGAAGAGTTT CATCGATTAG TTTACTTATA

194701 AGGCTTTCTC CAACTAGCCA TTTATCTGAA TGAAAGTCTT TCTTAGGCGG CTTAGGGAAA

194761 ACCCTGCGGA TATCGATTCC GCCTTGAATA AGTTCCAAGG TCTTCCATAC TTGTAACAGA

194821 TTGAGGACCT GATTCATGGG CCTACTTCTA CTTCTCTTAT AGGCTTTCAC GGTCAACAAC

194881 AGGCTTGGAG TAGATAAGTT TTTGATAGCG AACTCACTCT ATTGAGAAGA TAGATAAAGG

194941 CTCGAATTCT CTGTCAGAAC CTCTATCTGA TGCGGAATAA TAAGGTCTTG AAATCTCTGG

195001 TTCCATAAGA ATGGTTCGTT CTCCTCTTTC AGGACGATGA GTAATAGGTG GATGCGGACG

195061 AGTCCACTTC CCCTCCCGGA ATGAAAATAG GACCAACAAT CAAGCATGGG AGTAGAAAGA

195121 GATACTATCC GATAGCTCAT AACAGTTGGT ACGATCGCTC GGAGGGGCAC CCTTTCGGGA

195181 TGTCTTTCAA ACAAGCAACG GGTGAGCTAG CGCGAAAGCC GTTTTAGTTA GTCACTAAAG

195241 CCGTTTTCTT GCTGGAAGAA AGACGAATGC TTGGACGGAA TAAGGTCTAG GGGAGACCGC

195301 CCCGCCCATT ACCATCCACT TTGCTCTCTA GTGATTGCAG TTCCTCTCTC AGATAGACCA

195361 TAAACTTTTC ATACGCAATT CGCAATTCTT CGATCCATTC ATGAATGCGC AAGAGAAAGC

195421 GATCCATCAG ACTAGAGGGA AGTTTTTCTT TCTCCATGAC CCCACCATCA TCAATTTGAA

195481 ACTTTCACAG CACGGATGCA ATCAAGAAGC TGTTAACTAT GAGATTATTT CGGTATCTAT

195541 CTAACAATCA AGGGCTGACC TTCCTGCTTG ATTTCTCGAT CCAATCTCGC ACTTGGTCTG

195601 ATCGCACCGT AGATCAATCA AGTTGTAACC GAAGTAGACC AAGAAGGGAG TATGACCAGG

195661 CACTCTCTTG GATCTCATGG TTTGGAGCAA GCTCAGCTTT CCTTTCACTT GGCACGAGAC

195721 ACCGTACGCT ACACAGAAGA ACACAAGATT TGTGAATGAA TTTAACATAT TGACATTTCC

195781 ACATTAGACT GATTCAATGG AGAAAGCAAT GCCCTTGAGG AGAGCACTTC CTTCAGTTTA

195841 GCAATCAATT AGATCCCGAC TGCCTTAGCC TTGATGAAGC ATAGCTTGCC GTTTGATGCT

195901 ACTCTTGGGA ACATTGAGAG GAAAAGGCTG TTTTTGATTA TCCAGTTCTA TATCGAATAC

195961 GATCAGTTGA TCCCAGGAAA CCAAAGGGTT CTGGTGCTGG CTTTGTTACC GGTTCAACAG

196021 GAATTGGATC CTAAGCCTTC TTCTCGCTCG GACCGGACTA GTCAAATCCC ATTAAGGTTC

196081 GATCGAAGAG CTGAGTATAG TATATGCGAT CGGAGACGAC GTCGTAAGAC TAAGTGGCGA

196141 AGAGCTGAAT AACGTATAGT ATAGTAGAAG GTTTAAAGAG CTGAGTATAG AATAGACTCA

196201 GGAACGAAGA GCGACGTTTA GAGACGGCGG GAAAGAAGAC AAAAACAAGT AGAAATTAGA

196261 AGGTCTCTAC TTGCTAATAA AGTTAATATT GTTGGCTTAC TTGAAACTAG AGTGAAACCC

196321 CATAGAGCTA CTGGAATTAA AAAGAAGTTT GGTAGGGACT GGAGGTGGGA GCATAACTAT

196381 GATCACTCAA GAAAAGGAAG AATTTTGCTT GGTTGGAGGG CAGATTTTAT AGATGTGACT

196441 ATTTTGTCCA GGCATGAGCA ACTTCTCCAT TGTTCTGTCT GCACTAAGGG TGGTCAATTC

196501 TCAGCTTTGC TCACTGTTGT TTATGGTTTG CACACTATTG ATGATAGAAG ACCTCTATGG

196561 ACTTCTCTTT TTTCTCTTGC TGCAAGTTGC ACTAGTCCTT GGCTTTTAGC TGGTGATTTT

196621 CACTCTGTCC TTTTCTCTAG TGACAGAATT AATGGTGCTT TGGTCTCAAC CTATGAGTCC

196681 AGGGATTTTG CTACTTGTGT AGAGGATTGT GAATTGTATG AATTGAAGAG CAAAGGTTCC

196741 TACTTCTCTT GGACTAGTAA AGGTGCTGGT AATGGCAGAG TGGCTAGCAG AATTGATAGG

196801 GGCTTAGCTA ATAGCCTTTG GATGCGGGCT TTCCCTCATG TGGAAGTGGA CTACCTGTTG

196861 CCTGGGTTAT CAGATCACTC TCCCTTATTA TTCCAATGTG CCACTCCCAC TGTGGAGAGA

196921 GGGAAACCTT TTCGATTTTT TCATGTTTTG GCTGAGCATG AGCACTTCCT TGATGCTGTT

196981 CTTTCTGGAT GGCAACAATC TGTTAATGGT AGGCCTATGT ACAGGTTATT GACTCATTTG

197041 AAGCTTGTGA AACCACATCT TAAAGCACTA AATGCCAAGC ATTTTTCAAA TCTTTCTGAG

197101 AGGGTCACTC AATGGATGAA AATACCCACT TCTTCTTTTC TGCTATGAAG AGCAGATATT

197161 CTTCTAATAG AATCAATTCT CTCTACACTG CTGATGGAGG GAAGTTGGTT GATCCTGTTG

197221 ATATTCAGAA TGAAATTGTG GGATTTTACA CTGGTTTGAT GGGCACTAGG GCCACCCAAT

197281 TGCAAGGTAT TGACCTTACA ACTATGAGGG CTGGGAAGGG AAACAACTGT CTGCTGATGC

197341 TTGTGCTATG CTCTGTGCTC CTGTTACCTA TACTGATGTT GACAAGGCCT TGGCTACTAT

197401 TGATGAGGGC TTCGCTCCTG GTATTGATGG ATTCAATGCT GTGTTCTTTA AAAAAGCATG

197461 GTCTGTGATT AAGGGTGAGG TCTATGCTGC TGTGTTTGAC TTCTTTGAGA ATGCTTATAT

197521 GCTGAAGCAG TGTAACATCT CCACTATTAC TCTTGCGCCT AAGGTTAGCA ATCCAACTTA

197581 TGCCAAAGAT TTGAGGCCTA TAGCTTGCTG CTCTATGGTC TATAAGATTA TTGCTAAGAT

197641 CCGGCTTGCT AAGGTTGTTG GAGAAGTGGT GAATGATGCA CAAACTGGGT TTCTCCCTGG

197701 GAAACATATC TCAGACAAGA TTTTATTGGT CACTGAACTT ATTAAAGGGT ATACTTGGAA

197761 ATACATCTCT CCTAGATGTA TGATAAAAGT GGATTTACAG AAGGCCTATG ATTCTATTGA

197821 TTGGAGATTC ATAGTATATG CTAAGTTCTT CAAACCTTTC TTGTTTGCTT TAGGTATGGG

197881 ATACCTTTCA AGATGCCTGG CTGAATTGAA GAATAACCCT TACTTTCATT ATCATCCAAG

197941 ATGTGAAGCT GTGGAAATTA GTCATCTCAT GTTTGCATCT GATTGACTCC TTTTCTCCAG

198001 AGGTGATGAA TTATCTATTC AGTTGCTCTA TGGTGCTTTC TTGAAGTTTT CTAGGGCCTA

198061 TGTTAGCTAC TGCAGTTAAA TGCCTTTTCC TTTGTTTATG ATTGTACGAA AGCTTCTTCA

198121 AGCGCTAGTT CGTTAAGGAA GAGAAGAAAG GCCTAACGGC CCAGCGGCGG CTGACTGAGT

198181 TTAGTTAGTT AGTCTTTTCA ATCTGTCTTT AACAGCAGGA ACTACACTTA GGTATACTTA

198241 TTCCTTCAAA GCTGATGTTC AATCGTCACT TATCAAGAGA ACACTTCCTT CAGTCAAAGC

198301 GTTAGCGGCA TAAGAAGAAC AAGGAAAGAA AGCAGCATCG GTAATTGGAG TTTGTTAGGG

198361 ATCGGAGATT AAGAGAGCAA CATATCGGTA ATCAGCAACT GCAGGAGAGA CTAGTTCAAT

198421 ACTTGCTTCG TTCCTTAACG TTCGTGCTCC TAGCGAGCAA GAAAACGGAT GCCTTTAGTT

198481 AGTAATGACT AACGCCTCTA ATAACTAAGC TTTCGCGCCA GCGCGCTCGC CCTTATGCTT

198541 GTATCCTCAT GTCAAAGCGT TAGCAGCAGG ATATATATGG TTTTTGGATC GGATTAGGCT

198601 TTAGCCGGGA GCTGGTTCAA TAACAGCAAT AACAAAAGGT CAGTAAGAAT TCTTAATTAC

198661 AAAACCCCGT ATTTTAGGCT GCAAGTCCAT TTGCCCTCAT AGGTGGTGTT TCAATTCGAT

198721 ACAAATGCTC CTATACCGGA AAACGGTACA TCGAGTAAGA CGGTGTTTTA ATCTTCAACA

198781 ATTCCTTCTC CCTTATATGG CAAAACGAAA ACGGTACAAG GCCTTTTTTT CCCTTCCGGC

198841 GTCTATACTA GACTTGTCTC TATCGACTTC AGGTGAGACT TCTACTTTAG ATTCTGCTAA

198901 AGGTGAGACT GAAATCCCAA TTCTATTCTG AACAAAATGC ATAAGATAAT CAAGAAAGTA

198961 GCAAATCTCG CAAGTAAGAA GGTAATTTCC CAACTCTTAG GCAAGGAAGA AAGAGGCAAG

199021 GGAGATAAAC CTTCTTTCTC TTTCCATAGT AGGTGTAAGG GTTTGAAGTT GAATCATTTA

199081 TGTTTTGCTT CAGACCTGCT TCTGTTCAGT AAAGGTGATG TGTCCTCTGT CTCTCTCCTC

199141 TTGAGAGCCT TTGCCACTTT CTCTGCTACT TCTGGTTTGA AAGCCAATGT GGGTAAGTCT

199201 GCTATTTATG CTGCCAATGT TGATAATGGT ACTCTTTCAG AGCTGCTCCA CCTGTCAAAG

199261 TTCTCCCTTT GGAAGCTCCC TTTTAAGTAC TTGGGGGTGC CAGTGGCCTC CAAGAAGCTT

199321 AATGCTATGG ACTGTGAAAT TCTGGTAGAT AGGATAACAG CTAGAGTCAG AACTTGGGGC

199381 GAAGACTTAG TCGTAAGGCT AAGCGGCGAA GAGCGATGTT GATAGACGCC AATTCGAAGA

199441 CCTCTCTTTT TACGTCCCCA TGTCCCTCCG TGTGGCGACA TGGAGGCAAA AGGGGGGATC

199501 CTATCAACTT GTTCCGACCT AGGATAATAA GCCCATGAGC TTGGTCTTAC TTCACCGCCG

199561 AGAAACGAAA GAAGACTTCC ACCTCCAAGT TTAACTCGGA CGTCACTCGC TTCTTTTTGG

199621 GTGTGAAGCA GTGTCAAACC AAAATACCCA ACAAGCATTA GCTCTCCCTG AAAAGGAGGT

199681 GATCCAGCCG CACCTTCCAG TACGGCTACC TTGTTACGAC TTCACTCCAG TCACTAGCCC

199741 TGCCTTCGGC ATCCCCCTCC TTGCGGTTAA GGTAACGACT TCGGGCATGG CCAGCTCCCA

199801 TAGTGTGACG GGCGGTGTGT ACAAGGCCCG GGAACGAATT CACCGCCGTA TGGCTGACCG

199861 GCGATTACTA GCGATTCCGG CTTCATGCAG GCGAGTTGCA GCCTGCAATC CGAACTGAGG

199921 ACGGGTTTTT GGGGTTAGCT CACCCTCGCG GGATCGCGAC CCTTTGTCCC GGCCATTGTA

199981 GCACGTGTGT CGCCCAGGGC GTAAGGGGCA TGATGACTTG ACGTCATCCT CACCTTCCTC

200041 CGGCTTATCA CCGGCAGTCT GTTCAGGGTT CCAAACTCAA CGTTGGCAAC TAAACACGAG

200101 GGTTGCGCTC GTTGCGGGAC TTAACCCAAC ACCTTACGGC ACGAGCTGAC GACAGCCATG

200161 CACCACCTGT GTCCGCGTTC CCGAAGGCAC CCCTCTCTTT CAAGAGGATT CGCGGCATGT

200221 CAAGCCCTGG TAAGGTTCTT CGCTTTGCAT CGAATTAAAC CACATGCTCC ACCGCTTGTG

200281 CGGGCCCCCG TCAATTCCTT TGAGTTTCAT TCTTGCGAAC GTACTCCCCA GGCGGGATAC

200341 TTAACGCGTT AGCTACAACA CTGCACGGGT CGATACGCAC AGCGCCTAGT ATCCATCGTT

200401 TACGGCTAGG ACTACTGGGG TATCTAATCC CATTCGCTCC CCTAGCTTTC GTCTCTCAGT

200461 GTCAGTGTCG GCCCAGCAGA GTGCTTTCGC CGTTGGTGTT CTTTCCGATC TCTACGCATT

200521 TCACCGCTCC ACCGGAAATT CCCTCTGCCC CTACCGTACT CCAGCTTGGT AGTTTCCACC

200581 GCCTGTCCAG GGTTGAGCCC TGGGATTTGA CGGCGGACTT AAAAAGCCAC CTACAGACGC

200641 TTTACGCCCA ATCATTCCGG ATAACGCTTG CATCCTCTGT CTTACCGCGG CTGCTGGCAC

200701 AGAGTTAGCC GATGCTTATT CCCCGGATAC CGTCATTGCT TCTTCTCCGG GAAAAGAAGT

200761 TCATGACCCG TGGGCCTTCT ACCTCCACGC GGCATTGCTC CGTCAGGCTT TCGCCCATTG

200821 CGGAAAATTC CCCACTGCTG CCTCCCGTAG GAGTCTGGGC CGTGTCTCAG TCCCAGTGTG

200881 GCTGATCATC CTCTCGGACC AGCTACTGAT CATCGCCTTG GTAAGCTATT GCCTCACCAA

200941 CTAGCTAATC AGACGCGAGC CCCTCCTCGG GCGGATTCCT CCTTTTGCTT CTCAGCCTAC

201001 GGGGTATTAG CAGCCGTTTC CAGCTGTTGT TCCCCTCCCA AGGGCAGGTT CTTACGCGTT

201061 ACTCACCCGT CCGCCACTGG AAACACCACT TCCCGTCCGA CTTGCATGTG TTAAGCATGC

201121 CGCCAGCGTT CATCCTGAGC CAGGATCGAA CTCTCCATGA GATTCATAGT TGCATTACTT

201181 ATAGCTTCCT TTTTCGTAGA CAAAGCGGAT TCGGAATTGT CGTTCATTCC AAGGCATAAC

201241 TTGTATCCAT GCGCTTCATA TTCGCCTGGA GTTCGCTCCC AGAAATATAG CCATCCCTAC

201301 CCCCTCACGT CAATCCCACG AGCCTCTTAT CCATTCTCAC TCAATCACGG CGGGGGAGCA

201361 AGTCAAAATA GAAAAACTCA CATTGGGTTT AGGGATAATC AGGCTCGAAC TGATGACTTC

201421 CACCACGTCA AGGTGACACT CTACCGCTGA GTTATATCCC TTCCCTGCCC CCTCCCCATC

201481 GAGAAATAGA ACTGACTAAT CCTAAGGCAA AGGGCCGAGA AACTCAACGC CACTATTCTA

201541 CTATATCTTG TCTTGTCTTG AACAACTTGG AGACGGGACT TCTTTTCGCA CTATTACGGA

201601 TACGAAAATA ATGGGGAAAT TTGGATTCAA TTGTCAACTG CGTCACGATG ATACGGATCA

201661 ACCCCTTCTT CTTGCGCCAA AGATCTTACC CTTTCCAAAG GAACTTCAGT TCCATCTCTT

201721 TTCCATTCAA GAGTTCTTAT GTGTTTCCAC GCCTCCTTGA AACCCCGAAA AATGGACAAA

201781 TTCCTTTTCT TAGGAACACA TACCGCATTC GTCACTCCAA AAAGGATAAT GGTAACCCCG

201841 CCATTAATCA AATAACTTCA TTTATGAATT TCATAGTAAT AGAAATACAT GTCCTACCGA

201901 GACAGAATTT GTAACTTGCT ATCCTCTTGC CTAGCAGGAA AAGATTTCCC TCCGTGGAAA

201961 GGATGATTTA TTCCATTCGG ATCGACATGA GAGTCCAACT ACATTGCATT GCCGGAATCT

202021 GTGTTGTATA TTTGAAAGAG GTTGACCTCC TTGCTTCTCT CATCGTACAA CCCTCTTCCC

202081 GACGAGCCCC CCTTCTCCTC GGTCCACAGA GACAAAAAGT AGGGCCGGTG CCAATAGTTC

202141 ATCACGGAAG AAGGGACTCA CTGAGCCTGG ATCACTAACT AATACTAATC TAATAGAAAA

202201 TTCTAATAGA AAAGAACTGT CTTTTCTGTA TACTTTCCCC GGTTCTCTTG CTACCGCGGG

202261 CTTTACGCAA TCGATCGGAT CATATAGATA TCCCTTCAAC ACAACATAGG TCATCGAAAG

202321 GATCTCGGAG ACCCACCAAA GCACGAAAGC CAGGATCTTT CAGAAAATGG ATTCCTATTC

202381 GAAGAGTGCA CAACCGCATG GATAAGCTCA CACTAACCCG TCAATTTGGG ATGATCCAAT

202441 TCGGGATTTT CCTTGGGATC GGAAAGGAAT TGGAATGTAA TAATATCGAT TCATGCAGAA

202501 GAAAAGGGGT TCTCTATTGA GTCAAACGCT GTACTTATGG GATAGGGATT GAGTAAGGAC

202561 AGGGTGATCG TCAGAAGGCA GCGCTCCCAA CCGCAAGGCA GGAGGGCGAG AGCTCATTAA

202621 CCACCCTTGG ATCCGTTCAT AACATATTAT GGATAGACTT TAAGAATTAA TAAGTAAAGT

202681 AAATAGTCTC TGTCTTCTCT CTTTTATTGA ACTAAGTAAA TAAGGTAAGA TCAAGGAAGT

202741 ATAGTAGATT AGCTCCATAC ACAGATTAAG GCTAGAACTC CTTTCTTCTG TCGTGCCTTA

202801 CGTGCCCTAG TGTAAAGCTT CCACATTAGG CCAAAGCGTT GGATCTCAGG ATCGACATTG

202861 GTCCTAAAGG GAGAACTTTG CACTAAAGTT CGAGCATGGA CAGGAGGGAG TTGGACATAT

202921 CGGAAACTAT CCGAACGTGA GACAAGAGCG CCTTCAACCA TACCCGCATC CAACCATGGA

202981 GGCAGGTACG CTCTAAGAAC TCGAGTTCTT AGTGCCAGGT GCAATAAGTA CGCCATTTCC

203041 AAGCGTCCTT GTGAAGCGTG CGTCATCTCT TGTCTGAATT GAAGGCATCT CAATTACTAC

203101 CTAAGGCCTC CCCGGCCTTG GTTTACGTCT GATTCAATTC TCCCTGGCTT CCTTCCACCA

203161 CAGAGCAAGC CAGTTTTCAT CGGTTGGTGT GTTCCATAGT CTAGTGTTTC CATATAACAT

203221 AAAAAAGAAT AAGTGGGACT CATCTCTGAG AGATATGCCT TTTTATGACT AATTTAAAGA

203281 AAGTAGGTCT TCCATCAGGG GCATTCCTCA ATTCCATAGC CAACCAAGAA AGGCATGGGA

203341 GTCTTGGGGC ATAAGAGCCG AGTCTTCTTA CGAAGCAAAT AGCATTTCCT TCTTACTTGA

203401 CTTTCTTTAT GCTTTTTAAA CTTTAAGAGC TTTTCTACGC ACACGGCGTA GCGAGTGGCC

203461 AGCTTCCGCA CAATCTGACA GTAAATAGAA AAGGCATACT ATGGAATGAT GTTGGAGGAA

203521 GAACAATTCA ATCAGAATAA GCTGTTAATG AATTTCCTGA AGCAAGAGAT CCGGAATTGA

203581 TCAAGACCTG GTTTAAGGAA AAACCGGAAG TTCCCGCAGA AGACGAAGAT TGGGTGAAGC

203641 ACTTATGTTA TGGTGTTCTC CGCAAGATGT TTCAGTTTGC CGATCCCGAA GAGCGAGGTT

203701 TCGATCCGAC AACCTTAATG ATACCTCCCT CGGACCACGT TTCCCATGAT TGGAGCGTGG

203761 AGTGCAAGAT GGATAACGGA TCCTTGAATT TCTAATTATT CCTCGGAAAC CACCCAAAAA

203821 TCTTTCCCAC CTCTCCAAAC CATTCCTCTA ACTCATCCGA TGGATACGAT ACCGATATCG

203881 AAATCGTCAT CCAGCCTCTC CTCATTGCAT ACTGAATCCG ATATCTCTGA TTCCGAAACT

203941 TCCAATCCCG ATCTAACACC AGAACCTATT TTCATTCAAA ACATTGAACC TGAACATTCT

204001 GCATTATCTG ATGATGAATT GTCTGATGCA CCTAGGACAT GCATGTCTCC AGTAGAAGAG

204061 TCAGTCATTG TAAATATAGG GTCAGATAGT GATGTAAAAG AGGTCCGTGT AGGGTCCTCA

204121 TTGTCTCATG ATGAACAGTC CTCATTCATT GCATTACTGA AAGAGTATGT AGATAGCTAC

204181 GTCCAGAATT TCTACTACAC TCAACAGGCA GCCAGTCTTC TTCTCACATC CCATATTACA

204241 TAAGGTCAAG CAAGAGCATA AACTCTGAGA CTGCAGGAAG AGCTCTAACA AGGAAAAGAA

204301 AAGCCTTGCT TAGTACTTAT AGCAGTCACT GCAATTGAAG GATAGTAATA TAAACCTACA

204361 GCCTGCTTTT CTATCTTAAC TTTTAGGTAG GCTTCCTCGC TATCAATCAA TAGAAGAAAG

204421 CTGATATGAT ATAAGGCAGA GGACGGTGAC GGTAAGAGTG ATGATACCTA AAAAGACCAG

204481 GCAAGAAGAA TGTTCGCCTA AGCTGTAAGG ATTATTAAGC TATATTTCTT TAGCAGCAGA

204541 GGCAGAATCG AACAATTCTC ATTGCACAGG GAGCAAGATG AATCATTTGG TTCTTTCTCC

204601 AAAAAGGGGC AGCATACTTG CTTGGAAGAG GCTAGAGTTC CTTTGCGATG GGAACATGAG

204661 GTGGGCTGTT AACAGGTTGA AGTCGACCTT ATTGCAGTTG GGATTTCTTC TTGCTGCATC

204721 TGTATACGAT ATCTGAAAGA AATTCCAGAA GATTGATTCT TCAGTCTGAG ACAAAAAGAT

204781 TGTTCAAGCT TTGCACCTGA GAGGCCTGCA TGGCAGTTTG CACTCTAATA ATCTCATCCC

204841 TAACAAACCT GTTGCTTTGT TCCTTCTTAT CATTTGGAAT ATCCCTCTTC CAGAACAACT

204901 GGAGCCTTTG CAGCCTCACT TTACGCTTGC CCTTATTCCC GGTCTGCCAG CCAGTTAAAG

204961 GCCTTAGCTA TAGTAGCACT ATGCGCTGTG TCTATATCCT ATCTCAGCAA GTCAAACCCT

205021 AACAGGGGAA GCTTTTCACT CACTAAGGAT AGAAAGTCTC CGCGTAGGGG CAGAATGAAA

205081 GGCTTATCCA AAAGGAACTA GCTTCTGTGA AAGTAGAAGC ATCAGATTGA TTCCAATTGA

205141 AATTCTATAT ATATATAAGG CTACTATTTC AAGAAGAAGA AAAAGATTCG AAAGCAAGAA

205201 GAACTGCTGG ATTCGGCTCA GCTATAAGAG TGGAAAACCC AGCTTCAGGG GACCCGAGGT

205261 TCGGAGACTC GAGAGAGAAG GTTAAGGCAT GCTTTGCACC TAGAAAGTAC TACTTAAAAC

205321 GTTCCTCTGT CAGAGAAATT CATGCACAAG AGTCAGGTCA CTCAGAAGGT ATCTCATAAA

205381 GGAAGATTTA TACATGACCT GGTTCCGCCC CCAATCGCCG GGCTTGCTAA GAGCAGGGGC

205441 CGCAGCTAAG AATCCTTAAT ATTCCTCTTG CGGAGCATCC TTTGAATGGT TCACACTCGT

205501 GCCTGTTTGA AAGCATGTGA TAAAGCCTGC CTTTCAATGA CTTAATGAGA GCCGAGTAAA

205561 TCGCATCTTC TATAAGGCTG GCATCTAAAG AAAGCTGTCC TTGGCTGTCT CATTTTTTTT

205621 ACTATATTAG GACTATAAAA GGGGGCAAGT CGACTTTGCT ACACCATGTT TTAGGATATT

205681 TTCCTGAATG AGAAAGCTGT TTCAAGGCCA CTTTCAAGGG AATTTCTAAG AAGTTAGGTC

205741 GGGAATAGAG GGATGGTTCT TTTTCGAGTT TCATAAGAGA AGATACCTCT TAGAGGGGCT

205801 GTCTTTGCCC GAGGGAACCC TTTCTCCAAC TGCCCTATTC TTGTTTTGAA ATCATTATCT

205861 TATGTATATA CCTACGGCAG ATGATGTCTT GGTGTACACG GGATTAGCCC GAATGTTTTT

205921 TACGTCTTTA TCTTCCTTCG AAGATAAGGT CTAGTGCGAG CAAGTCAGGG TTCTCCGGGC

205981 AAGGAGAAGG GGCGGAAGAG CTGAGTCGTT TTACGACTCA GTATCGAAGA CGACGACAGC

206041 GGCCGTCAGG CTAAGTGGCG AAGCTCCAAA TAGCGTTGAT AGACGCAGGC TCGAAGAGAC

206101 AGACAAGTAG AGTATCTACG CCGGGAAGAT GGAAGAAAGA TAGTAGCACG GAAGAAGGCA

206161 GTTTGTTTGA AAAGCTGTCT AAAAGGCTGA TTCTTCAAGT AGCAAAGCTA ATCTAATTCA

206221 GCTTATCGGG TTTCAACACA AGTCTCAGGT ATCTTCGCCT AAAAGTCAAT CAACTTGGCT

206281 CTTCAATCCT TCTACTATAC TATACGTTAT TCAGCTCTAC TTAACTTAGT CTTACGACTC

206341 AGTCTCCGAT TCTTCTACTA TACTATACTC AGCCGCCCTA AGCTTAGCCT GACGACGTCG

206401 TCTTCCAACC TTCACCTTAT CTTATCTATG ATATTGAATT ACCGGGCTTC TTTCCAAAAG

206461 TAAGAACGTC CCAAAGAGTT AGCTAAAGAA TAAGACTGAG CTTTTCGATA TTTGAGACTT

206521 TAAGAATCAG CGTTTTAGAC TGATGGTCAT ATTTTCAAAC TAGTCCTGCG TCTATACTAG

206581 ACTTGAGTCT TCGACCCTAC TATTACTGCT GTTCATAAGT ATATTGCTAC AACATGGAAT

206641 TTCATTGCTA AACCTGAAGT TCACGAGGAT CTGGTTAAAT GTACTTCTAA AGATGATAAA

206701 GATGCTGTCC TAGCTGCTGG TCCTCATATG TTTAATGGCA AACCAATTAT AGTATAGTGA

206761 AGCCATGGAC TGAGGGAGGG TTTTGATTTT CACTCTGAAG TACTCAAAAC CATTCCATTA

206821 TGGTCCCTAA TCTGTCCTTA AACTGTTGGG GTTAGTAGGA TTGGGAGTGC TTTGGGTGTT

206881 CCAGTGCAGA TGAGTGCACA TCACGACAAT TGAGGGAATC TTTTGCAAGA TTGCTGATAG

206941 AGATGGATGT TACCAAAGCA CTCCCCTCTT CTGTGAGTGT AATGGATGAT CAGGGCATTG

207001 TTTTTGAACA AAAGGTAGTC TTTTGTAAGA AGTTGGCCAC AATTGTGACA AGACTAAGCA

207061 AGCTAAGCAG TGGGTACCTA AGGCTGCTCC CAAGGTCAGT GGTAATGCTC GGGTTCCTGT

207121 TACTGAACAA GCTGCTGGTA GGACTGCATG CAGTTCAGGC ACCATCTGTT AAGGAGACTC

207181 CAGCTCAGCC TCAGCCTCCA GTTACATCTG ATGATGATGG TGGGTGGAGG GTTGTATCCA

207241 GGAAGTCTAG GGACAAAGGG AAGAGGACCA TGCGCGGAAG TGGTAGTATG ACTAATGCTT

207301 TTCAGGTACT GTTGGAGGAG CAACCTGCTG TGGTGGGTTC GGATCCTGGT GATGGTGCTG

207361 AGAGTGTTTA CCTCTCTTAA TTCTTTTGTT AACTTGGAAT GTAAGAGGAC TTAATGATCC

207421 TCTTAAACAA GTAGAAGTGA AAACACTATT AGCTCCTAAA GTAGTCAATG TGGTTGGATT

207481 ACTTGAAACT AGAATCAAGG ATCATAATAA ACAGAAAGCT TTGAAGAGAT GGAGATGGTG

207541 TCATAATTAT ACCATGTCTC CAAGATTGGT TGGACCATAG GTGCGATGAT TTACTTCACG

207601 GGCGAGGTCT CTGGTTCAAG TCCAGGATGG CCCAGCTGCG CCAGGGAAAA GAATAAGAAT

207661 CGAAGAAGCG TCTGACTCCT TCATGCATGC TCCACTTGGC TCGGGGGGAT ATAGCTCAGT

207721 TGGTAGAGCG CCGCTCTTGC AATTGGGTCG TTGCGATTAC GGGTTGGATG TCTAATTGTC

207781 CAGGCGGTAA TGATAGTATC TTGTACCTGA ACCGGTGGCT CACTTTTTCT AAGTAATAGG

207841 GAAGAGGACT GAAACATGCC ACTGAAAGAC TCTACTGAGA CAAAACAAAG ATGGGCTGTC

207901 AAGAACGTAG AGGAGGTAGG ATGGGCAGTT GGTCAGATCT AGTATGGATC GTACATGGAC

207961 AGTAGTTGGA GTCGGCGGCT CTCCTAGGTT CCCTAATTTT GGATCCTGGG GAAGAGGATC

208021 AAGTTGGCCC TTGCGAACAG CTTGATGCAC TATCTCCCTT CAACCCTTTG AGCGAAATGC

208081 GGCAAAAAAA AGGAAGGAAA ATCCATGGAC CGACCCCATC GTCTCCACCC CGTAGGAACT

208141 ACGAGATCAC CCCAAGGACG CCTTCGGCAT CCAGGGGTCA CGGGCCGACC ATAGAACCCT

208201 GTTCAATTCA ATAAGTGGAA CGCATTAGCT GTCCGCTCCC AGGTTGGGCA GTAAGGGTCG

208261 GAGAAGGGCA ATCACTCATT CTTAAAACCT TCAAACCAGT ATTCTTAAGA CCAGGGAAAG

208321 GAGTCGGGCG GAAAAGGGGG GAAAGCTCTC TGTTCCCGGT TCTTCTGTAG CTGGATCCTC

208381 CGGAACCACA AGAATCCTTA GTTCGAGTTG GATTCCAACT TATCACCCTT TTTTGAGATT

208441 TTGAGAAGAG TTGCTCTTTG GAGAGCACAG TACGATGAAA GTTGTAAGCT GTGTTCGGGG

208501 GGGAGTTATT GTCTATCGTT GGCCTCTATG GTAGAATCAG TCAGTCGGGG GCCTGAATGA

208561 AAGACGGTGG TTTACCCTGT GGCGGATGTC AGCGGTTCGA GTCCGCTTAT CTCCAACTCG

208621 TGAACTTATC CGATACAAAG CTATACGATA GCACCCAATT TTTCCGATTC GGCTGTTCGA

208681 TCTATGATTT ATCATTCATG GACGTTGATA AGATCTTTAC ATTTAGCAGC ACCTTAGGAT

208741 GGCATAACCT TAAAGTTAAG GGCGAGGTTC AAACGAGGAA AGGCTTACGG TGGATACCTA

208801 GGCACCCAGA GACGAGGAAG GGCGTATTAA TCGACGAAAT GCTTCGGGGA GTTGAAAATA

208861 AGCAGAGATC CGGAGATTCC CGAATAGGTC AACCTTTCAA ACTTCTGCTG AATCCATGGG

208921 CAGGCAAGAG ACAACCTGGC GAACTGAAAC ATCTTAGTAG CCAGAGGAAA AGAAAGCAAA

208981 AGCGATTCCC GTAGTAGCGG CGAGCGAAAT GGGAGCAGCC TAAACCGTGA AAACGGGGTT

209041 GTGGGAGAGC AATACAAGCG TCGTGCTGCT AGGCGAATCT GTGGAGTGCC GTACCCTAGA

209101 TGGTGAAAGT CCAGTAGCCG AAAGCAGCAC TAGCTTACGC TCTGACCCGA GTAGCATGGG

209161 GCACGTGGAA TCCCGTGTGA ATCAGCAAGG ACCACCTTGC AAGGCTAAAT ACTCCTGGGT

209221 GACCGATAGC GAAGTAGTAC CGTGAGGGAA GGGTGAAAAG AACCCCCATC GGGGAGTGAA

209281 ATAGAACATG AAACCGTAAG CTCTCAAGCA GTGGGAGGGG ACAGGCTCTG ACCGCGTGCC

209341 TGTTGAAGAA TGAGCCGGCG ACTCATAGGC AGTGGCTTGG TTAAGGGAAC CCACCGGAGC

209401 CGTAGCGAAA GCGAGTCTTC ATAGGGCAAT TGTCACTGCT TATGGACCCG AACCTGGGTG

209461 ATCTATCCAT GACCAGGATG AAGCTTGGGT GAAACTAAGT GGAGGTCCGA ACCGACTGAT

209521 GTTGAAGAAT CAGCGGATGA GTTGTGGTTA GGGGTGAAAT GCCACTCGAA CCCAGAGCTA

209581 GCTGGTTCTC CCCGAAATGC GTTGAGGCGC AGCAGTTGAC TGGACATCTA GGGGTAAAGC

209641 ACTGTTTCGG TGCGGGCCGC GAGAGCGGTA CCAAATCGAG GCAAACTCTG AATACTAGAT

209701 ATGACCTCCA AATAAAAGGG GTCAAAGTCG GCCAGTGAGA CGATGGGGGA TAAGCTTCAT

209761 CGTCGAGAGG GAAACAGCCC GGATCACCAG CTAAGGCCCC TAAATGACCG CTCAGTGATA

209821 AAGGAGGTAG GAGTGCAGAG ACAGCCAGGA GGTTTGCCTA GAAGCAGCCA CCCTTGAAAG

209881 AGTGCGTAAT AGCTCACTGA TCGAGCGCTC TTGCGCCGAA GATGAACGGG GCTAAGCGAT

209941 CTGCCGAAGC TGTGGGATGT AAAAAAGCAT CGGTAGGGGA GCGTTCCGTG TTAGATGGAA

210001 GCATTGGCGC GAGCCATGCT GGACGAAGCG GAAGCGAGAA TGTCGGCTTG AGTAACGCAA

210061 ACATTGGTGA GAATCCAATG CCCCGAAAAC CTAAGGGTTC CTCCGCAAGG TTCGTCCACG

210121 GAGGGTGAGT CAGGGCCTAA GATCAGGCCG AAAGGCGTAG TCGATGGACA ACAGGTGAAT

210181 ATTCCTGTAC TACCCCTTGT TGGTCCCGAG GGACGGAGGA GGCTAGGTTA GCCGAAAGAT

210241 GGTTATCGGT TCAAGGACGC AAGGTGACCC TGTTTTTCAG GGTAAGAAGG GGTAGAGAAA

210301 ATGCCTCGAG CCGATGTTCG AGTACTAGGC GCTACGGCGC TGAAGTAACC CATGCCATAC

210361 TCCCAGGAAA AGCTCGAACG ACCTTCAACA AAAGGGTACC TGTACCCGAA ACCGACACAG

210421 GTAGGTAGGT AGAGAATACC TAGGGGCGCG AGACAACTCT CTCTAAGGAA CTCGGCAAAA

210481 TAGCCCCGTA ACTTCGGGAG AAGGGGTGCC CCCTCACAAA GGGGGTCGAA GTGACCAGGC

210541 CCGGGCGACT GTTTACCAAA AACACAGGTC TCCGCAAAGT CGTAAGACCA TGTATGGGGG

210601 CTGACGCCTG CCCAGTGCCG GAAGGTCAAG GAAGTTGGTG ACCTGATGAC AGGGGAGCCG

210661 GCGACCGAAG CCCCGGTGAA CGGCGGCCGT AACTATAACG GTCCTAAGGT AGCGAAATTC

210721 CTTGTCGGGT AAGTTCCGAC CCGCACGAAA GGCGTAACGA TCTGGGCACT GTCTCGGAGA

210781 GAGGCTCGGT GAAATAGACA TGTCTGTGAA GATGCGGACT ACCTGCACCT GGACAGAAAG

210841 ACCCTATGAA GCTTTACTGT TCCCTGGGAT TGGCTTTGGG CCTTTCCTGC GCAGCTTAGG

210901 TGGAAGGCGA AGAAGGCCCC CTTCCGGGGG GGCCCGAGCC ATCAGTGAGA TACCACTCTG

210961 GAAGAGCTAG AATTCTAACC TTGTGTCAGG ACCTACGGGC CAAGGGACAG TCTCAGGTAG

211021 ACAGTTTCTA TGGGGCGTAG GCCTCCCAAA AGGTAACGGA GGCGTGCAAA GGCAGAAGGG

211081 AGCTTGACTG CAAGACCCAC CCGTCGAGCA GGGACGAAAG TCGGCCTTAG TGATCCGACG

211141 GTGCCGAGTG GAAGGGCCGT CGCTCAACGG ATAAAAGTTA CTCTAGGGAT AACAGGCTGA

211201 TCTTCCCCAA GAGTTCACAT CGACGGGAAG GTTTGGCACC TCGATGTCGG CTCTTCGCCA

211261 CCTGGGGCTG TAGTATGTTC CAAGGGTTGG GCTGTTCGCC CATTAAAGCG GTACGTGAGC

211321 TGGGTTCAGA ACGTCGTGAG ACAGTTCGGT CCATATCCGG TGTGGGCGTT AGAGCATTGA

211381 GAGGACCTTT CCCTAGTACG AGAGGACCGG GAAGGACGCA CCTCTGGTGT ACCAGTTATC

211441 GTGCCCACGG TAAACGCTGG GTAGCCAAGT GCGGAGCGGA TAACTGCTGA AAGCATCTAA

211501 GTAGTAAGCC CACCCCAAGA TGAGTGCTCT CCTATTCCGA CTTCCCCAGA GCCGCCGATA

211561 GCACAGCCGA GGCAGCGACG GGTTCTCTGC CCCTGCGGGG ATGGAGCGAC AGAAGTTTTG

211621 AGAATTCAAG AGAAGGTCAC GGCGAGACGA GCCGTTTATC ATTACGATAG GTGTCAAGTG

211681 GAAGTGCAGT GATGTATGCA GCTGAGGCAT CCTAACAGAC CGATAGACTT GAACCTTGTT

211741 CCTACATGGC CCGATCAATT CGATCGGGCA CTCGCCATCC ATTTTCATTG TTCAATTCTT

211801 TGACAACACG AAAAAACCAT TGGTCAACTC TTTGACAACA TGAAAAAACC AAAAGCCCCG

211861 CCCTCCCTCT CTATCTATAT CTATCCAAGA GATGGAAGGG CGGAGGCCTT TGGTGTCCCC

211921 CCCAGTTAAG AATTGGGGCC CCACAATCAC TAACTAATAT GCCTTTCTCT CATGCCTTTC

211981 TTAGTTCGTG GTTCGATATT CTGGTGTCCT AGGCGTAGAG GAACCACACC AATCCATCCC

212041 GAACTTGGTG GTTAAACTCT ACTGCGGTGA CGATACTGTA GGGGAGGTCC TGCGGAAAAA

212101 TAGCTCGACG CCAGGATGAT AAAAAGCTTA ACACCTCTCA TTTTTTTTCT TTTTCATATT

212161 GAAAAAGTAA TAAGAATGAA AAGGTCGTCT TATTCAAAAA CCCAATTATG ACATCCCTTC

212221 TCTCCCACTT CACATCTCGG AATGCACCGT TCTTATTCTT AGAGAAACGC GCTTTCACAT

212281 CTTCTTAACC CGAAATGGCT GGGGAGAGGA AAGGTTCCTT TTTTTTTGAG GATACTCCCG

212341 GGAACAGATC CAGTGGAGGC GGGGTGGGGC CTGTAGCTCA GTGGATTAGA GCACGTGGCT

212401 ACGAACCACG GTGTCGGGGG TTCGAATCCC TCCTCGCCCA CAACCGACCC CAAAGGGAAG

212461 GACCTTTCCC CTTTGGGAGT AGGAAAATCA TGATCGGGAT AGCGGACCAA AAGCTATGGA

212521 ACTTGGGTGT GGGTCTTTTG TCGAAGTGGA ATGGGCCTTG CTTTTTTTTA TTACGTGTTA

212581 TCTTTTATCG TGAATCAAAT TTATTTAAAT TTACATATAG TATGCCCCCG GCCTATTTTT

212641 TTTATGCCCC GCACCTCTTT CTCACCCAGG CTTGGGCAGA ATAGCAGAGC AAGTACAAGT

212701 ATTAGTAGCA TAGCTAAAAT GCGTTCCTCG TCATGTCATT AATATGTTTT ATGGTTGCTT

212761 GCGGTAATTG CAGCCTCTCG GGAGAATCAA TGACTGCATC TTTGATGCAC TGCTAGTACA

212821 TCCGAGAATT CTTAATTGGC TAGTTGTAAA TAGCCCCAGG ACTACGGAAC AAAAGATTAT

212881 CCCGGACCTA CACCGAGGTA TTGACGGAGA TTTTCAAATA GCGCAGAAGA TAATGAGAAT

212941 GTGATACGAC GAGATATAAA AAAAGACAGG GAAGGGGTCA CCCACTTACC TACTCTTAAC

213001 GGCCAAAGCG AGTCCCTTCA TTCTGAATTA AACAATGAAG AATGAATACA ATCTCCCCAA

213061 GTAGGATTCG AACCTACGAC CAATCAGTTA ACAGCCGACC GCTCTACCAC TGAGCTACTG

213121 AGGAACAACG GGAGACTCGA TCTCATAGAG TTCAATTCCC GTTCTCAACC CATGACCAAT

213181 ATGAGCTCGA AGCTTCCTTC GTAACTCCAG GAACTTCTTC GTAGTGGCTC CCTTCCATGC

213241 CCCGTTTCAT AGGGAACCTC AAAGTGGCTC TATTTCATTA TATTCCATCC ATATACCAAT

213301 TACATTCATT TAATATCCTT TTCGACATAA GAGATATCGT TTCTAGTCTA TCTCTTTCTA

213361 TTTCTATATA TATATATGGA AAGTTAAAAA AAAAAATCAT CATATAATAA TCCAGAAATT

213421 GCAATACAAA AGAAAAAAAA GGGAGGTTTG TAATGATTTT AAAATCTTTT CTATTAGGTA

213481 ATCTGGTATC CTTATGCATG AAGATAATCA ATTCGGTCGT TGTGGTCGGA CTCTATTATG

213541 GATTTCTGAC CACATTCTCC ATAGGGCCCT CACCATTTCA AGAAAGGTTG GAAGGTTGGG

213601 TACGGAACGA CCTGCAAGTA ATATTACAAA GGCTACAGAA CCACATGCAA GAGGAAAACT

213661 AGGTACTGAA ACAAAGAAAT CCGTAGTTAT CATAAGAAAC CCTTGTTTGA GTAGCTTCAA

213721 ATTCATCAGC AAAAAGGGGT CTACCTAGGT ACCCTTTGCT CAGCCTCGTT TTAGGACATG

213781 GCTGACAAAA TAGATGGGTA GTTGGGTCTT GATGCGCTCA ACCAACAGAA CTGCTGCTAC

213841 CGTTTTGGGT GATGCTGAAA TGTATAGCTG CAACCTCTCT CCTTCTTTCG GTCTTGTGAC

213901 CGTAGGAAGT TTCTTTAGAT GCTCTTTTAT TGCTGCGAAC GCTGTCCTTT CTTCCTCTCC

213961 CCATTTGAAG GTGTTGTTAC CCCTAAGGAG CTGAAAGAAA GGTAGGGCCT TGTCAGCTGA

214021 TTTGCTGATG AATCTGGTGA GACATTCTGC CTGTTAGCCT CATGACATCC CTGGTGCACT

214081 TGGGCTCAGG CAGATTAAGG ATTGCCTCCA CTTTATCTGG GTTAGCATCT ATTCCTCTTT

214141 CGCTAACGAG GAAAGCTCCA AATTTGCCTG ACTTTACCCC AAACACACAT TTTTTGGGAT

214201 TGAGTCTCAT CTTGTACTTG CGCAATGTGG CGAATGTTTC TTTGAGGTCA GCCAACTTCT

214261 TCGGTGATGC TCTTGACTAT TGAATCATCG ACATATACCT CTATGTTCCT ACCTTTCTGC

214321 TTTGTGAATA TGTGATCCAT TCCCCTCTGG AAAGTTGCTC CTGCGTTTTT CAGGCCAAAA

214381 GGCATAGCTC TGAAGCAGAA GACTCCTTCC TCAGTGACGA ACGCTGTCCT GTTTCTGTCA

214441 GGCTCATATA GGCTGATTTG ATGATATCCT GAAAATGCAT CCATGAAGCT GAGCAGAGCT

214501 TGTCCGCTTG TAGCGTCCAC TAGCTGGTCG ATTCGAGGCA GGGGGAACAA GCAACGGGTG

214561 AGCGAGCTAG CGCGAAAGCC TATAGCGTTA GTAACGCGCT ATAGTTTTCT TTGATTATCA

214621 AACAACAGCC TCAAATTTCT ACTCTCAAGA AGTTGACTTA CTGATAGTAA GTTATGCTTC

214681 AAATCATTGA CATATAAAAC ACCAGTCAAT GTCACATTAG GGGATATCTT GACATTTCCC

214741 ACTTCATTAA CAGTTTGAAC ACTTCCATCA AGTAAACCTA CTCTAATTTC TTTCCTTAGA

214801 GTTCTAACAT TGCTCATAAT TTCTTTGTTC CCTGTAAAGT GATCACTAGC ACCTTCATCT

214861 ATAAGCCATG CACTCAAAGC ACACAACTTT GCATCACTCA TCTCTTTTGT GACTGTAACA

214921 TTACCTGCAA AATTGCTCTG GCTAGTCACT GTTCCATTCT GCTTCTCTCC CATATCATTT

214981 CCTGCACCAA ATGAAATTGT TATCTGGTTT CACTCCACTG CTTTCACCTT GTTGATTTCC

215041 AAAGTCTAGA GGGTTGTCTC CTGCATAGAG ATTTCCTTCC CTTTTCACAT TTGCAGCCTG

215101 TCTCTGGTTT GGTTTTCCCT TAGGGTTTTT GAACCAATCT GGATATCCCA CTAGCTTGAA

215161 GCATTCTTCC TTGAGATGTC CTCTCATCCC ACAGTGGTCA CACCTTTTGG CTTCCCTTTC

215221 CATCCTCATT TTTTTGTAAT CTTTCTTCTG GAAGTTCTGA AGTGGTCCAA GGCTTTGACC

215281 TTGTCTGTTC ACAGCCAAAG CACTCACTTC TTCTCCAAGA TTCATCTCTC CAGTGATCTG

215341 TTTTTGCCTT TCAACTTGAA GAACCAAGTT GTAGGCTTTA TTGACGCAAG GGCTCCATCC

215401 CTAGGAAATT AGTCTTCATC TGGTCATAAC CTGAGTTCAG TCCCATGAGA AACTTGAGAA

215461 GTTTGTTGTT CTGTTCCATT TCTAACACTT TCTTCACAAC ATTGCAGGTG CATTTGGCCA

215521 TTGCACCACA GCTGCATTCT GGTATCTCTT CCAATTATTC AATCTGATCC CACAGATCCT

215581 TCAGTTTGCA GTAATATTCT CCAACTGACA GGTTGTTTTG CTGCATCTCC CATAGCTCCT

215641 TTTTGAGTTG AAATAGCTGA GGAGCATTAG TTTGCCCATA TCTCGCCGAT GTGAGATCCA

215701 TGGCTGAATG CTTGCTTAAA GCACCCAACT CATCATTGGG GAACTCGTAG GTTCGATTCC

215761 TCTCTCGTCA CTAGATCCTG GTCAAAATTC TTCCTGAGAA ACAATGGGGG CGGTTCGTTC

215821 CTCTTCCGAC CATATAAGAA TTCGACCTAT TTCCAGAAGT CTCTGTTTTC AAAGGGTGTT

215881 GCCGCTAAGC CAGAGGCTGG GCTAGGGGGT TTCTAGTCCG ATCATCCAAA GAAACCTGAG

215941 ACACTAAGCG ATCCCACCGC CGCCAGTGAA CTAAAACGAC ACTGGGGCTG ATCCCTTTCC

216001 TGTTGATGCA AGTAACTGAA CTGCCTTAAG ATACGAATGA TAGCCCGCAA CCTTTCCTGG

216061 CCTTGCGCCC TTAGGAAAGT CATCAGTCCT CTTTCATAAC CTATGATGAT TCATTTCCTC

216121 TTTGATTAAC CGCTTTTTTG GACAAAATTC CATTCCCCTT AATAAAGAAT TCAATAGCAT

216181 TTGACTAACT CGGGTTTAGT AAAGCAGTAC TGATCCCCGG GGATTCCTTC CATTCCTTCC

216241 AAGGAAATGG GAATGGATAT AATGGCACGG GCTCTTTCTG GATTGGTGCA CTCACCCCCT

216301 TTATTGACTA GTGGGATATT GAAGCAGAGA ACCCTCTCGC CGGCCGATCT TCGTCTCCTC

216361 CTTTTGTCCA ATGATTCCTT CTAACAGTCG TGAACAAGCC CTGCTAACAG CTCTTTGAAA

216421 GATTCTATTC CTATTTCCTG CTCGATAAGG GTCAGAACTC GATCCGGGAA TTTCATTAGA

216481 CCTCGCGCTC TTACTCTTGG AGGAAGATCT GCTTGAGAGC ATCGAATCGT TGCTGCTTTT

216541 GCTATTGGTC TACAAATCGC TGCAACCAAT GTCCCGAAAG TAGCCTCCGT CCTCTTTTGA

216601 GTAGAATGAT GGGCTCTTAG GAATAGAAGT GGGCATGAAT GGAGCTTCTA GGACTGTGTT

216661 GACTGAAGCT CTCTTTGTCC ATCTAATCTT GATTTGCTGT AAACAGACGA TAGTGTCAAT

216721 TGGCTTATTC GATGCTCACT GTTAGGAGTT AACCCGATCG AGATCAGATG ATGCAAGGAT

216781 CGGATTTGAG ACACTTTCTG GGAATTCGCC TCTTTCGGGA TCTTCTATGA CTCTATTAGC

216841 TTCTTTCTTC CAACGTCCAA CGGAGGTCAC TTCGCTCGCC TAAGAAGGAG CTGTGGGACT

216901 TTTTGGATCA ATTGCTGAGG AGCAAACGAT CTTGGCTTAG AGAGATGCGC CTTTTAGCTT

216961 GTTATCGCTT TTTAGGTTCT TGCTCTGGTT TCAGGGAATC CCTCACCCAG TTCCATATGG

217021 TTCCGAAGGA AATCCTAGGG CATTAACCTT TCTGGGAAGC CGGTCCCTTT ACATAGCCAT

217081 AATAGGCAGT TTTTTTTAAG TAGCTGCAAT TGAATCGGCT GGTCTAGAAT CAGCTGCTAG

217141 AGAATAGGCC GCTAGGGGTA CAGATTTGCT AACTGTTCAA TTAACCAGTG TTCTGTTTGC

217201 AATTGAATGC GTATCAGCTG TGATTGAATC AGTAAGCGCT GCAGATCTGA TCTATAAAGA

217261 ATGACCCTCA TTCGATCTCA GATGGGATGA ATACAAAGGA AGTCTTTTTC ATTTTTACGA

217321 TGCATACCCC TTCCTCATTA ACTATGTCAT GTAACTTCCT TTAGTTTAGC AGCTCCGGTA

217381 TCGGTATCGG TAGCATTCAC GACTCTTGAA CTAACAACCA TAAAGCAGAG ACAGAGAGAG

217441 GAATTAGTAC CACAGACGGG CAGAGAGAGG CTACTTTCTA ACAACCATGT TAGCAAGCGC

217501 TTTCGCGTCA CCCGTTGCTT GTTTAATAGC TTATTACTTG CTTAAGGATA TGTAATAGCT

217561 AAAGACTTTT CTTTCTTTTT TAAGACTTCT CAAGTATGGA TCTAAGCACA TAAAGTTGGA

217621 TTTTGGCCCA TACAGTTTTC ATCTTATGTA TTTGGATCTT CTCCCTGCAA AAAGGAGAAA

217681 TATCAGCTAC ATAAGTATGT ATGGGTCCCT CTACCAGGGA ATATACTATA TATAGGACTA

217741 GAGGCCTGTT TGGTTTTAAC CACCAATCAT GAGCGGAACA CCCCGCTATT CAATTCGCTG

217801 ACTCTAGGAT GCCAAAACTA CACTTTACAG AATCCTAATA GATGTTCTAT AATTTCTATT

217861 GGTGTCAGGC CTCGCTGGGA ATTGACCTTT AAAATAAAAG GCTGATTCCC TATCCTACTT

217921 AAGCTTCCAT CTCTAGATGG TACTAGAGTA CGAGAGACTT TATGCACCTT CTCTTGCGGT

217981 GACCTTGTGT GAATTGTGCA AGAATTGGAA GGTCTGTAAA GGAAAGGGGA CCAAGCTTCT

218041 TCTGTAGTAG AGTGGATATA TTTGACTACT TTGATAGGGG CTGTAAGACT TCCAACCATG

218101 GAAATCACGG TCTAAGTAGC AGAATCATTG GTGCGCTAGG CCCTTTAGTC ACTCGATTAG

218161 CCGTGAAGAA GGTGCATACT TGCTTCGCTC TTCTAGTTGG TTCGTGGAAG AGGTCTCATA

218221 CTCCTCCAAG GCAGCAACGC GCACTACGGG TACTAGTTTC ATGGTGATTC GTTTTCCCCG

218281 TACACCTCTA TGGCAGACTG CAAGCACAGA AGCTAATGGA ACGATTGCCC CACGGAGGAA

218341 TGCCCGGCCC GAGTTTCAAA GCAGAGGTGA AGATCATTCG ACAAGAGGAA GCATAGGGGG

218401 AGGGTGGAAC TCTACTTTAC ATAAGCTATT TAGAGCGATC CCCGTAGATT AGAGAAAAAA

218461 GGGAAATAGC AAGGAAAGAG CTGGACTTTG CTACAGACAT ACCAGGGAAG ACTCTGACTA

218521 CTAACTGTGG GGATCCCTTA GGCCTCACAT TCGATTAGGG AAGGCAGTCC CGAGACTACA

218581 ATAATCAGTG GACTGCTCGC CGCATTGATT CTTTATCCCC GGATGGATAT TGATAGATTC

218641 CTAGTACCGA CAGTACCGAC CTTACTTCAG GCTCGAAGAG ACAAGTCTAG TATAGACGCC

218701 GGAAAGAAGA GCCGAGTATA GTCTATACGA AGGAGCGAAG ACAAAAGGTA GTGGAAATCA

218761 AAATCTTTCT ACACCATCAT TCATTGAGTA TTTTTTGCCT ACTTGAGACA AGAGTCAAAA

218821 GTCATAATTT TCAGAAAAGT TGTAAGAAAG TTAATAGGAC CTGGACATGG GTTGCTAACT

218881 ATCAGTGTTC TCCTAAAGGG AGGATTTGGT TGGGGTGGAA TGCAGCTGAG GTGGACTTGA

218941 CTGTGCTGGA AGTTCAGGAA CAATTCATCC ACTGCGCTGT TTCTAGCAAG CAGTCTGATG

219001 TGTCTTTTGT GTTTACTTTG GTGTATGGCC TTCATTCTGT GGAAGACACG AAATGTTTAT

219061 GGCTTCAGCT TCAGCAGATC TGCTCTGTAC TGAGGGGTTC TAAATGGCTT CTCATGGGAG

219121 ATTTTCATGC TATGCTACAT ATGGATGATA GGCTTCATGG TGCTCCTGTT AGTCTCTATG

219181 AGATTAGAGA CTTTTCTCAT TTCATACAGT CTTCAGGTTG TAGTGAGCTG AGGATGGTAG

219241 GGTGGTCTTA TACCTGGTCC AATAAGGCTA TTGGTGATTC TAGAACTTAT TCTAGAATTG

219301 AGAAAGCTCT AGGTAACCGG GAGGATTATA GTGCTTTGCA GGTTGAGGTT CTGAATCCTT

219361 CTATTTCAGA TCATTCACCT CTTCTATTGA CTATGCGGGT TGGAGGAGGA AGGCCTTTTA

219421 GGTTCTTTAA TCACTTAACT GATCATAGTC AATTCTTGCC TATTGTTCAA TCTCAATGGA

219481 TGCAGGCTGT TTCTGGCAGT TCTATGTTTC AGGTCTGGAG GAAGTTGCAG GGTATTAAGG

219541 CTCAACTTCA AACCTTGCAT GCAGAGGAAT TTGCAGGCAT ACACCATAAA ATTGCTCAGG

219601 CTCAGAGTGA CCTGGATATG ATTCAGAGTG GATTAAAGGA TGCCCTGGAT GATGTCACAC

219661 TGCAACAGCA AGAACAGCAA TGTGTCTCTA CTTTGAGGAA ATGGTTTCAA GTTATTGAAG

219721 CTGCTTTACA GCAGAAAGAT AGAATTATGT GGCTTGGTGA TTCCAATCAT CATTTCTTCT

219781 ACTCTTCTAT GTTGGTAAAA TAAAGGATTT TATTAAACCA AAGTAAGCTG TAAAGCCCAA

219841 CTTACAAGCA CAGAGTTACA ATCAAACTAG TTCAGAATAT GACTCCTAGC TAATTTCTGA

219901 ACATGCAAAC AACGAAAACA CATCAGAGTT TTAACATGTC TAACAAGCAC ATCAGGTTCA

219961 CAATGCTGCT GCATGAACCT CCTACTATTC CTTTCTTTCC GGAGTACTTA GAATCTTACT

220021 AGCTACCTCG GAGAGGGAAT ATATTTCAAA AAACAATCTC TTTTAGCTCC GTTCATCCGC

220081 TCGCTACGCT TTGGAGAAAA CCTACCGAGG GGAATAGAGT AAGGGATTCC TTAGCTTGAG

220141 GTTCTTGCAG TTCTTGTAGC TATTGAGGTA GGGGTTCGGA CAAGCTGAGT GAACGGATAG

220201 GATAAGCCAG CTTGAAAAGA GAAAGCAGAA AAATCATAAG AGAATCAAGT ATGCTTAAGT

220261 CAACAAGCAA CGGGTAAGCG CGCTAGCGCG AAAGCTTATT TAGTTATTAG AGGCGTTAGT

220321 CACGCAAGCC GTTTTCTTGC TCCGATAACG CCGCTTCTTT TTTTCGTCGA GATTGGGTTG

220381 GTCTTCAGTG TACTTTCGTA CAAGATCGAA AAGAATGCAT TGGATGGATG CCCGGGCATT

220441 GAGAAGGAAG GACGCTTTCA GAGGCGAAAG GCCATGGGGA GATACCGTCT GTGATCCATG

220501 GATCTCCGAT CGGGAAACCG TATCCAAGCT CCGTGGCTAG TCTGCGCTCT TTGGACTTTT

220561 CAAACTTAGC GAACTGAAAC ATCTGAGTAG CTAAAGGAAG GGAAATCAAC CGAGACCCCG

220621 TTAGTAGCGG CGAGCGAGAG CGGATTGGGG GTTTGAAGAA AAACAAACAC GAATAAGAAT

220681 AGAAGTGTGA ACTTCTTTTT CGCCAGGTTT CATTCGATTT GTTGTGGATT GGATGATGGA

220741 AAAACCAGCA AGCTACGGCT GAAAGGCTTA GTAAGCTTGA AAGCCACTTA CGCCTATTTC

220801 TTAGGCTCCA GGGCGCAGGG AACTGTAATT GTGAAAAGGT TGGAAGATCT GGCCAAAGAA

220861 GGTGATAGCC CTGTATCTTC GTTCCCATGG TTCGATCCTT CCCAGTAAAA CGCGGCGTGT

220921 TCGAATTCTG ATCGCTTTTA CGCGAGAAAG GGGGACCACC CTCTAAGCCT AAGTATTCCT

220981 CAATGACCGA TAGCGTACAA GTACCGTGAG GGAAAGGTGA AAAGAACCCT ATTTAGGGAG

221041 TGCAATAGAG AACCTGAGAT CCGATGCGAA CAATCAGTCG AAGGAGCGGA GCAAGAAAAC

221101 GGCAGCGCGT GACGGTTTTC GCGTCACCCG TTGCTTGTTC CTTTACTTTT GATTCTATTA

221161 GTAAAGCGCA CTCACTCTAA CGGCGTACCT TTTGCATGAT GGGTCAGCGA GGAAATGGGA

221221 ACAGCGGCTT AAGCCATTAG GTGTAGGCGC TTTCCAGAGG TGGAATCTTC TAGTTCTTCC

221281 TATTTGACCC GAAACCGATC GATCTAGCCA TGAGCAGGTT GAAGAGAGCT CTAACAGGCC

221341 TTGGAGGACC GAACCCACGT ATGTGGCAAA ATACGGGGAT GACTTGTGGC TAGGGGTGAA

221401 AGGCCAACCA AGATCGGATA TAGCTGGTTT TCCGCGAAAT CTATTTCAGT AGAGCGTATG

221461 ATGTCGATGG CCCGAGGTAG AGCACTCAAT GGGCTAGGGT GGCCCCCATT TCGCCTTACC

221521 AACCCCAGGG AAACTCCGAA TACAGGCCTA GATCGTTTGT ACAGACAGAC TTTTTGGGTG

221581 CTAAGATCCA AAGTCGAGAG GGAAACAGCC CAGATCGTAC GCTAAGGTCC CTAAGCAATC

221641 ACTTAGTGGA AAAGGAAGTG ATCGAGCGAT GACAACCAGG AGGTGGGCTT GGAAGCAGCC

221701 ATCCTTTGAA GAAAGCGTAA TAGCTCACTG GTCTAGCTCC ATGGCACCGA AAATGTATCA

221761 GGGCTCAAGT GATTCACCGA AGCGACGAGA CCTTGAAAGC AGCTTTTTCA AGTGTCAGTA

221821 GCGGGACGTT CTGTCAATCG GGGAAGGTTT TTGGTGACAA CACCTGGAGA TATCAGAAGT

221881 GAGAATGCTG ACATGAGTAA CGAGAAATCC TGTGAAAAAC ACGATCGCCT GCCAGTGGAA

221941 GGCTTTCTGC GTTCAGTCAA TCTACGCAGA GTGAATCGGT CCCTAAGGAA CCCCCGAAAG

222001 GGCTGCCGTC CGATGGGTAC ACGAAAGTGA CGAAGTTGCT TTGACTACAG AACCATGCCT

222061 GTCTGTTGGA GCGAATTGGA TGATCGGGCC GACTCTCGTC GCCTCTTCCC CTCACTCTCC

222121 TTTCCCTAAT ATGAACCTTG AGTCATCAAA GCCTTTCTGA CTTGGCCTGG CCCGGTCGCC

222181 CTACGCGACT GGCGCTTCAA AAGGTAGTTT CTACTTGCTT ACTTGTTAGA GTAAGGTTCA

222241 AAGACAAGTC TAGTATAGAC TAGGTTCGAA GAGAGACTTA TAGTATAGTA TATGCTAAGG

222301 TCGGAGGCGG ACACTTTTTG TTATCTAAAG GCGAAGACTG ATCAGTGGGC GAACACTCGG

222361 CCCAGCGGGC GAACATGCCG GGCTCCGGCT CCGCGCACCT GCTGACACCT TTCGAAGCAC

222421 TTTATAGTGT GCGCTTTAGT TTTAGAATGT GTCGTTCATC CATACTTGTT CCAAGTAAGT

222481 GAATTGCATT ACCATACTCT AACGAGTAAG CAAATAGGAA TTACCTTACT TGTTCAAGTA

222541 AGTGAATTGG CATTACCTTA CTCATTCAAG TAAGCAAGTA GTCGAGTTCC TTCGCCTTAC

222601 GAGTCTACAA GCCTTTCTCA TTTCAGTGCT CGAGCTTGAG CTGATGTCAG CTCAAGGGGC

222661 TGGATGAAGT GTCTGGTTTG ATAGAACCAG GTTCGAAAGA CTGAGGCGAT AGACTCAGAG

222721 GCGGACGCGC TGAGCCGATA GGCGAAGAGG CGAAGAGCTG AATAACGTTG ATAGACGAAG

222781 GGGCCTTTAG TCGAGTAGAG GTTTCAGCAA GCAGAACCTA CCATAGTCGC GAGTCTGTTT

222841 ATAGTCGCGA CTGTTGTCAT AGTCAACAAG GGCGTTTAGG CTTCCAGGAA AAAACTTCGA

222901 ATTGGGAGGG CGATCCTCCC GGTGAACTGA CCGTACCCCA AACCGACACA GGTGAACAAG

222961 TAGAGTATAC TAGGGCGCTT GAGAGAACCA TGTCGAAGGA ACTCGGCAAA ATGACCCCGT

223021 AACTTCGGGA GAAGGGGTGC TCTCCTATCT TTTGATTAGG AAAGCGGCAC ATACCAGGGG

223081 GTAGCGACTG TTTATTAAAA ACACAGGACT CTGCTAAGTG GTAACACGAT GTATAGAGTC

223141 TGACACCTGC CCGGTGCTGG AAGGTCGGAA GGAAAAGTGT TATAAGCTTT GAATGGAAGC

223201 CCCAGTAAAC GGCGGCAGTA ACTCTAACTG TCCTAAGGTA GCGAAATTCC TTGTCGCATA

223261 AGTAGCGACC TGCACGAATG GTGTAACGAC TGCCCCGCTG TCTCCGACAT GGACCCGGTG

223321 AAATTGAATT CTCCGTGAAG ATGCGGAGTA CCAACGGCTA GACGGTAAGA CCCCGTGCAC

223381 CTTTACTATA GCTTCGCAGT GACAACCTTG ATCGAATGTG TAGGATAGGT GGGAGGTGGT

223441 GACACACAAC GACCAATCCT GAAAGACCAC TCTTTCGTCT AAGGATGCCT AACCGCCGCA

223501 CCGATCATTC GGGGGAAGGC GGGACACTGC GAGGTGGGTA GTTTATCTGG GGCGGATGCC

223561 TCCTAAAGAG TAACGGAGGT GTGCGAAGGT AGGCTCAAGC GTCTATTCTG CTCGTGAGCG

223621 TAATGGTATA AGCCTGCCTG ACTGTGAGAC CGACTGGTCG AACAGAGACG AAAGTCGGCC

223681 ATAGTGATCC GGGAGTCCCG TGTGGAAGGG CTCTCGCTCA ACGGATCAAA GGTACGCCGG

223741 GGATAACAGG CTGATGACTC CCAAGAGCTC TTATCGACGG AGTCGTTTGG CACCTCGATG

223801 TCGACTCATC ACATCCTGGG GTTGAAGAAG GTCCCAAGGG TTCGGTTGTT CGCCGATTCA

223861 AGTGGTACGT GAGTTGGGTT TAGAACGTCG TGAGACAGTT CGGTTCCTAT CTACCGTTGG

223921 TGTTAAAGGG AGAACTGCGA GGAGCCAACC CTAGTACGAG AGGACTGGGT TGGGCCAACC

223981 TATGGTGTAC CGGTTGTTAT GCCAATAGCA GCGCCGGGCA GCTAAGTTGG TATGGAAGAA

224041 CTGCTGCGCC GCGGGAAATC CTTCTCTATA CAAGTTCTCG GACGAGGTTT TTGAACAGAA

224101 CTTCGATAGG CGAGAGGTGT AAGCACCGCG AGGTGTGAAG CGATCTCGTA CTAAACGAAA

224161 CTACTTTCAC TTTCCATAAC CAAAATGAAA GAAAGTCAAC GCTCCGCTCC ATACTTGTTC

224221 CAAGTAAGTG AATTGCATTA CCATACTTGT TCCAAGTAAG TGAATTGCAT TACCATACTT

224281 GTTCCAAGTA AGTGAATTGC ATTACCATAC TTGTTCCAAG TAAGTGAATT GCATTACCAT

224341 ACTTGTTCCA AGTAAGTGAA TTGCATTACC ATACTTGTTC CAAGTAAGTG AATTGGCATT

224401 ACCTGCAATT GCGGTCAGTC TCGCTACCTC TTGAGTTGCC GCCCCCTACT TGCTCATTCG

224461 CAATTACTAC CACCTCTACC CCGGCCAAGC AACCAAAGCC GGGGACCTAG GTGAGAATAG

224521 GGAAAGAAAG AGAAGAAGCG GGGTAGAGTA ATTGGAAAAC TCATTAGGCT CATGCCCTGA

224581 AGATTGCAGG TTCGAATCCT GCCCCCGCCT AAGAAGTGTT TTTTCATTTT AGGTATAGAT

224641 GGTACTGGAC AAGCTCTTAG GGAAGAATCT CTTTCGCCCT TATTTATTTC CGGACTTTTT

224701 TCTATGAAAA GACAAATCAA AAATTTCACT TCGAATTTCG GACCTCAACA TCCTGCTGCT

224761 CATGGTGTTT CACGATTAGT ATTGGAAATG AACGGAGAAG TGGTGGAACG TGCAGAACCA

224821 CATATTGGAT TACTCCAGTG CGGCACGAAG CCGCTGACGC CGAGTCGGCT CCTATGCCGC

224881 TAGCTATGCT ATGCCCTGCT TGGTCCCCCG GCACGCTTAA GGTTCCGTAG CGCGTTATGA

224941 GCACCGGGCT AAGGGGCGGT TGAGCAACTC AAGCGAACCG CCCTACCTTA TTACAACATA

225001 AGGACAGAAG GGAGAAGGTT GTGAAGGTGG CCTCGTTATC TACATCCCCG GTCGGGAGAA

225061 TAGAATAGAA TAGAGGACCG ACCGAGACCC GGGTTTCACG AGCGTTGGCG GGTCCTGGAG

225121 TGCCTGTCAA GGGCGCTAGC GCATACCCAC CCCGGGGTGA TCATCACCAC CTGCACCTCA

225181 CATCTCGGCA CAGTGGAACG TGTAACCCGC CTGCTGTCCC ATTTCACTAC ATTTGTTCCT

225241 CTAATCCATA GCCTAACAGA ACGCAGCAGC GAGGGGCAAC CCGCCCATAC AGCCAGCGGG

225301 GAGGATGGCA CTACTGGCAA AGACCGTCTG GCGAAAACGC CGCAGGCGCG AAGCGGGGTA

225361 GGCCTGCGCC GAGGGAGCAT AGCATAGGGA GGAACCCGGA CGGTGGAAGA ACCGGGAGAG

225421 GCCAGGTCAT TTGACGGAAA TGTAAGGCTT CCCCCTATTA GAGAAGGCCC TATGGGGTAA

225481 AGGGAAGTGC ATGAATTCTT AGAAAAATAG GAAGCGAGCC TATATAATGA TAATATAAAA

225541 AAGAAAATTC CATGAACAGA TAGAGTCAAC GGTACAACAG AAAGCGCTGC CTACACGCGA

225601 ATTTGCTTCC GAGGTCGAGC AGTCTCAATG AATTTGACTA CAGGTGGTCC GTAGGAATGC

225661 TGGGCTGGGC CACCTCGAAT GGCGTGAGCC GCATGCGGGG AGACCCGCAC GTACGGTTTT

225721 TAGGGGGATC CGGTCGAAAG ACCGGCCGGC GCCCACCCGA CTAGAGGGAC TGAGAAATTA

225781 ATAGAGTACA AAACTTATCT TCAAGCTTTA CCTTATTTTG ATCGTTTAGA GGGCGATCGC

225841 GGAGTCACTG AATGAAGTCC TCCGTTTCTT TCGGAGATGC TGACCCGCAG CGAAGCAGAG

225901 ATGACTAAGT GACATATAGA ATATGGCAAC GACAACAGCA TGTCGTAGAA GGAGATAAGA

225961 GGTGGAGCCA ACGACCCACT AAGACTAACG TATCTACAAC TACATCCCCC GAGCGGCAGT

226021 CAAACGAGGG CGTGAATGCG AGATGCCAGC GGAATGATCG GCCGGACAGA GGCTAGGGCA

226081 GCTTTCTTCC CCACCGCGTC TTTCCTTGTG TGTCGGAGAT ATAAAGCGAG TGCACCGGAA

226141 AAGAACGGGA ACTGACTCGA TCTATTCTAT GGCGAAGCAT CCAAAGCATA ACTGCACACT

226201 CACACGATCT TTGCCGAGAG ATAAGAGCAT TCGGTGAAAC CGGTGAACTA CACTATCTTC

226261 TGGATAGATG TGTGGGGCAG AGGGCTCGTG GTACCTCCTG CTCACCCTTC CTCCTCCGCT

226321 TTGAGAACCG TGTGAACGGA GAGTGGGCAG AAGGGAAGGA GGTCCTCATA TGGAGTCGCA

226381 CACTTACTTG AGCAGTGCGA GAGACTGGGA AATGGGTTGA GTCAACTCCC TCCCGAAAAA

226441 TAACAGACAA AGCTTGACTT AGATAGTGAT TTGTATTTCT TTTTTCTTAG TGATTGGAAA

226501 GTGGGGCTCC TATTGACTAG ACGTCAACCT CCCTCAATCA AAGGGAGACC CGTTTCAATA

226561 CTAGTTTTTA GGTTATGCTG TCATTTTGAC AATATCATTG AATAGCATGG CCTGGGGCTA

226621 AGGTAACTCA AGTAGGAGAG CCGTGTTATG GGTGACCTTA TTGCACGGTT CAGAGAGCAC

226681 TTGTGTATGT GATGCAAGTG AACGTGTACG AAAAAGCTGT ATCTAGGGTG AGTTCTTCGT

226741 TCCGTCGTCG ACCCTATCTA TGTTTCTATG ATGGCCCAAG AACACGCTCA TTCTTCAGCC

226801 GTAGAGAGAC TTTTGAATTG CGAGGTACCA TTACGAGCTC AATATATACG AGTGTTATTC

226861 CGTGAAATAA CTCGAATTTC AAATCATTCA CTTGCTTTAA CTACTCATGC TATGGATGTG

226921 GGAGCATTAA CTCCGTTCCT GTGGGCTTTT GAGGAGCGAG AGAAATTGTT GGAATTCTAT

226981 GAAAGAGTCC CGGGAGCCAG GATGCATGCC AGTTTCATAC GACCAGGTGG AGTGGCACAA

227041 GATCTGCCTC TTGGCTTATG TCGAGATATT GATTCCTCCA CACAACAATT TGCTTCTCGT

227101 ATCGACGAAT TAGAAGAGAT GTCAACCGGC AACCGTATCT GGAAACAACG ATTAGTGGAT

227161 ATTGGTACTG TCACTGCGCA GCAAGCAAAG GATTGGGGAT TCAGTGGTGT AATGTTAAGA

227221 GGTCGTGCGA CATGAAGACA TTGATAGCAA TATGGGGGAA GTTCCCATCA GGCAACAGCG

227281 GTTCTGCCTG ACCCTACTAA AGCATGCATA TTATGTCAGT GAAGACTTGG TGTGAAGCCT

227341 TGGAGCTTAC GTTGGAAGAA GGCCCGGGGC TGGGGTGAGT TGAGGGGGGA CAGCGTAAGT

227401 GAGCGAATGT GTGTAAGCCC AGTCAAACAT GAATGTTCTA GGTGGGGCGG GCCACCCGCC

227461 TTCGAATGGT GTTGGTCCGT AGGACCGTGA ACGGATTCGC CTCTGGCCTC TGGGCACGTC

227521 GGAACCGCAT GAGTTCACCG GGGTGGAGCA CAGTCCGCCA AAATCGGCAT AGGTTAAGTG

227581 CTATTGATGG AACATGGTAA GCCTATCTTT CTCCATATGG AAGTGCTGCG GGCACATAGA

227641 GATGTGGGTA AAGGAAGCCT CAAAAAGCGA AGGCCGTGTA GGTCGCGTGA CCTGCACCGA

227701 GTTGGTGGCT GACTGGGCTT TTTCCTTGAT CAAAGAAAGC AGATCAGCTC GCCTTCTTGT

227761 TATCATAAAG TTGGTCGAAT CGGGCCCCGG AACGTCGAAT GAAATAAGTG GCCGGGTTCT

227821 CTTTTTACAA CCCTTTTTAT ATGATAGGCC CGGCCCCCTT CCCCTTATGT TTAGGAGCGG

227881 GATCCCCCCA AGAACGACCA TTCTTGTGGT GGTACGGAAG GCGTGGACTC CGCGAACGTC

227941 CCGCGCCCCC CCTTATTAGT AAGGCAGGAG AAAGAAAGCC TCAACTAGAA CCACATTCAT

228001 TCCCGACGCA TAGTATATAC GTCGCTCTTC AAACCTTTTG CATGCGGATG TAGTTAAGTG

228061 TCTGACTCTA TTGGTCATAG TTTCCTGCTG TTGCGGCCGG TGCTCGTTTG CGCGCGCGTG

228121 AACCAACCCA ACAAAGAAGG AAAGGATGCC CGGGCATCTG AGAATGATTC GAGCCGTATG

228181 AAGGGAAACT CTCAAGTACA GTTTGTTTTT TTTGGGGGGG GGGGAGGAGC CCGACAGGGT

228241 CCCCCCACTG ACTTGGCTCG GGCCTAAGCG AAAGTGAAGT GGTGGGCCTA CCCATCCCAA

228301 CCAGGGGTAT GCTGGGATTT GCGAAGAGCA GCACCTTACG ATGTTTATGA CCAATTGGAT

228361 TTTGACGTAC CAGTAGGTAC CAGAGGAGAT CGCTATGATC GTTACTGTAT CCGTATCGAA

228421 GAGATGCGAC AAAGTGTTCG GATCATTGTG CAATGTCTTA ATCAAATGCC TAGTGGCATG

228481 ATCAAAGCCG ATGATCGTAA GCTATGTCCT CCATCACGAT ATCGAATGAA ACTATCCATG

228541 GAATCGTGCG CCGTGTGAAA CGTAGATCAT TGCCGTTCTT AACCGAGACT CAGGTTAAGC

228601 TCCGTCTCGG AACCATGTGG GGTTAGGAGT AAAGCATCCC GAGGTTGGCG CATCTCGTTG

228661 GGCGTGGAGA AGCATTGGGA ACCTCAATTT CTATCTTCGG AGCCCTTTCT TTTCTCGTCC

228721 CCCCGCCCCG GCATAGCGCT TCGCTTCCGG TTCTTAGGAA GAATCTACTG ACTTCTTTCT

228781 TCTTCATTGA TCTGGGGGAA AAGAAAGCGT CTACCAGTTG GAAAGCTAGA CATCAAGTAA

228841 GTGGCTTGAT GAGGATAACT AAGCTGACAC GCCGGAGTTG GCTGCTGGCA CAACTGGTGG

228901 TGCCTTACCG CGCCGCAGGC GGACGCGCGG TAGCGTTCGT GGTGGTGCTT CAGGATTCCA

228961 ATGTACTGCG TCCAAGATCA GAACGAGCTT GCCGGCGGAC CACTGCCGTC CCATTCTTGA

229021 GTGAGCTGGA GCGCAGCCAT CTTATCCACT GAACTAGCTA GAAGCTATCG CTTTGGGTCG

229081 AAGCACTAAA AGAAAAGGAC CGGGAAACGC GGCGGCATAG GAACCACGGG ACCCCTACTA

229141 GTTAAGGAAA AACAAAACAG AAGTTTTTCT TTGTATAGGT TGGGTTGCTG GATACGGGAT

229201 CCTTATAGTA GGCTGGGCCA ACATCCAGCC GAGAGAGGGC AGTCTTTAGA AGCAACAGGC

229261 TGGGAAAGCA AGAGAAGGCT TTCTTTGTGT TTTCTTCTCT TTTTCCCGCC CTAGGAGTAG

229321 CACAAAAAGA GGAACCGGGA AGGGTTATTG ACCCAATGAT AAACCACTAG CACCTTCCTC

229381 GTTGAGGCTC CGTGCACTGG GAAAGCGGCC ACTAGTAACA AAGCTCAAAT AAGGTAAGGT

229441 ATCGAGAGGG CTATCACAGT CAGGTGCGAA GCAATTACCC CCCAAAAGTA ACCTTATTCC

229501 TATTATTTAT AGGGGGGTGA GGCGAGAAAT GACTTGATGA AGCGTTCCGT TCGCCACGCA

229561 CTGGCCCCAT TCACTTGCTT CTCGTAGAAG TTGTAAGTAC ACAGTGCCCC ACAACTATGA

229621 ATAGTATAGT GAGGTTAAAA CACAAGAGTG CCCTTTAGTC TATCAACTCA ACTCAGAGGA

229681 GAAGCTCCAA GTCGTAAGAC GAAGGTTCGA AAGACTGAGG CGATAGACTC AGAGGCTGAT

229741 GCGCTGAGCC GGCAGGCGAT GGATCGAAGA GCTGAATAAC GTCGTAAGAC TCAGGGGCAA

229801 AGAGAAGCGA TTTTGCTACT GAGAAAGCGA ACGGTCAGCG CGAAGGTTCA AGACTTAGCC

229861 AAGCGTCGGT AGCAAAGCTG ACAAGGCAAG GCCTTAGCAA AGCGCCATTC TCATAGTCAT

229921 AGCGGGGCGC TTCGAGTTAG CGAAGCCCTG TAGTAGGGCC GAAGCCCTAT GTGATAAAAT

229981 ACTGAGCCAA GGACGCTCCG CCTTATCTAT AGAAGCAGTC AACTGAGTTC TGAACAAATT

230041 AGCTCCTTGG TAATGGCTTA ATCTATAGAT AGAAAGCCTT ATGATGGGAA ACTATCACGT

230101 TAGGTTTGGA GAGAGATGAG ACCGGTTATA TAATAAAGAG AGCAGATGCA AGCTTTTTCT

230161 TTCAATAGCC GGCCAAATGA CTACAGGATC ATCGGTCTAC TCTACCTCAA TTCACCATTT

230221 CGAACCTTAT ACAGAAGGTT TTTCCGTACC AGCTCCTTCT ACCTATACCG CAGTTGAAGC

230281 ACCTAAAGGA GAATTTGGTG TCTTTCTGGT CAGTAATGGA AGCAATCGTC CTTACCGTCG

230341 TAAAATAAGA GCACCTGGCT CTGCCCATTC ACAAGGACTC GATTCTATGT CCAAACATCA

230401 CATGCCAGCC GATGTGGTCA CCATCATAGG TACTCAAGAT ATTGTGTCTG GAGAGGTGGA

230461 TAGATAGGAC TACTAGTTGC TCGATCAGGA CCCTAGCTTT ATTGCGAGCC AAAACCTTGC

230521 AGGATTCCCG CACAACTGAG TATTACACAG AAATGAAAGG ATTATGGGAA GAGCTTTAAT

230581 CCCTGGGTTC TCTTCCAGTT TTGAGTAAGA CAGATGGTGA GATAAAAGGT TTTCTGGAAG

230641 CATTGCACAA GCGAGTTTAA GCTTTTTCAA TTTCTAAATG GATTAGAGGA GGCATTTGGA

230701 CGGACCTCAA AGAAGTCAAA TCTTAATGAT GAAAGTATTA CCATCTGTTG AGGCTGCTTG

230761 TAGTATGCTA CAGCAAGAGG AAGCTCAGAG AGAACTTCAT AAGCCTGTGA AAGTAGAGCA

230821 GGATACACTT GCTATGTATA GCAAAGGAAA TGAGACTGTG AGTTGCACTG CTTGTGGAAA

230881 GGCAGGACAT GTCAGAGAGA AGTGTTTGAC CATTCATTGT AGGCTATTCA TCTGCACATC

230941 CAAAAGGCCA ATATGGAAAC AGTAACAGAG GAAATAGAGG AGGCAGATGG AATAGGGGAG

231001 GAAGATCTAA CAGAGTAGGA AGGAAATTTG GAGGAAATGT GAGCACCAAT TGTGAAACTG

231061 GTAGTACTTC TGCCCCTAGT GGTTTTACTG CACAGCAGCT TAAGCAGTTA ATGAAACTTT

231121 TGCCTTCTCC CTCAAAGGTA AATGGATCAG AAACAGATGA AGAAATGGAT TCTAGTTATG

231181 CTGGTATGGT GAGTTGTTTT CAAGCAAATG TGAAAGAAGG AGTGTGGATA ATAGACTCAG

231241 GTGCATCACA TCACATGACA GGAGATTTGA ATCTGTTGTG TGAGGTAAAA GAGACAGGAA

231301 ATCCGCCTCT TATAAGTCTT CCAACTGGTG AGTGAAACTG CAAGGATAGC TCACAAGGGA

231361 TTGGTGAATC TGAAGAACAG TATACAATTG CAAAATGTAC TACATGTCCC TGCATTCAAA

231421 CACAACCTAC TCTCAGTTCA GAAATTGGCA GAAGACTCAA AATGCAAAGT CAATTTCATG

231481 CCTAAGTACT GTATCATTCA AGACAACAAA AGTGGTGAAA TCAGAGGAGT AGGTAAAGCA

231541 TCCAATGGAC TGTATTACAT GGTGAATGAG TCACTAAGAG AGCTAATGAA AAGACTGAAC

231601 ATCAGTGCTG GAAATATAGC TATGAATGCT AATCTGAACC CTAAAGTGCC TGCATGCAGT

231661 TGTGACTAAG AAGAAAAAGC TCAGCAAAAC CACTATTTGG CACCTGGTCA AACTCCTTAC

231721 CAAAAAATGA AGAGAATAGA GGGACTGGAA GGATTGAATC ATAAGAGTGA TGAGGTGTGC

231781 CTCACCTGTC CCCTTGCTAA ATTCACCAAG CTGCCATACA CTCAGAGCCA ATCCAGGGCA

231841 AGTCAAATAA TGGAACTCAT ACACATTGAT GTGTGGGGAC CATACAGAGT GGCAACAAGG

231901 AATAATCATA GATTCTTTCT CACAATTGTG GATGACCACT CCAGGACCAC ATGGGTACAT

231961 TTGCTCAAAT ACAAGTCAGA TAGTTTCTCT GCAATCAAAA GCTTTGTTAA GATGGCAGAA

232021 ACTCAGTAAG TATGGGAAGA AAGTAAAGAA GATGAGATCT GGCAATGCTC TGGAGTTTGA

232081 TGATAAACAG TGCAGACCAT TCTTTGATGA GTTAGGAATC ATTCATCAAA CCTCATGTGT

232141 TGATAGGCCA GAGCAGAATG GGATAGTTGA GAGAAAACAC AGAAATATCT TGGAAATACT

232201 AAGGATACTA CTGCGTCCGC TGGTGCTGAA GAAGAACCGC GATATGATGA GCCTGCGCCT

232261 TTCATCGCAC AGAGATCTTG ACTATGGGCG AGTACCTGAG ATTTCCTTTC AAACTTTCAA

232321 AAAAAAAGTT AGAGTTTTTA TAAACCCGTA AAAATCCGTA GAGGAAGCCC CGAGTTCTAC

232381 CTGATGGAAA ATGAATAGAA GCTGCTATTG AATTAGAATT GGAATAAGCT GTGGCACTTA

232441 CTTAGATACC TTAACTCCTT ACACTCTTAG CATACCCCAA AGAGTTCTCG CAAGGGATAT

232501 CACTGGTTTT AAGGGATGGG ACATCTTTTC TAGTAGACAG AATGGCATCC GAAGCAATAG

232561 TACCTTTCCC TAAGCAGTGC TTGAAACAAA TTCATTCACA TGTCCCAAGA ACCATTGCCC

232621 TGTACTCTGC CTCAGGCTGT AGAGGATCTC TCTCGTCAGC CCGGAAATAG GATAAAGATC

232681 GAATTGGAGC ATGAGGGCCG AGTGGTTCAA TCAAGTTGAA AAGAAAGGGT GACAAGGGCA

232741 CGAAGTTGCC CGGTGGGTAG GCTAGAAAAG ACATCGAGTC AGTAGCTTCC TTGTAAGAAA

232801 GAGGCTTTAG GAAGCTATTG GGCAGGAGAA GGAAGCCTAG GTCAGTCTTT CTTTCGCCCT

232861 TCTTTACCTT ATTCTATCTC CTTGAAAGGG GTTTCCATCG TTGAGTTTAC GTGTCCCGAT

232921 TACTATTCCT TCTGTCAAGC TCGGGAAAAA GCAGAAAGCG ATGTACATTC CTTTCCTATA

232981 CGGCGGGCCT AAAAGTCAAT CTTTCCCTAG CTCTCAAAGG GTAGACGCGG GCACCGTACT

233041 CTTTTATTTG ATTGAATCTT TCTATCTCAA CTTCTTGGGT GCGTGATCTC GCATTGAGAT

233101 TAAGGATAGA GACTTAAGAT CCCATTACCA TTACTTCGTT GAGCCACTCC CATTCCTATC

233161 GCTTGAAGCG GAAGAAAGAA CATATATGGA ATATGACAGG TATCGGTATT GAACAGACGG

233221 AAGTCGATAC AAGCAGATCA GCTGGTCAAA AAAATCCTCT GATGCTCTAG CCAAAGCTTT

233281 GAACCAGTTC CTCACGTCAA GGACAGGAAA GATAGATTAG ATTACTGTCC TATCAGTGCA

233341 ACCGCCGATT TCTGTCAGTA TTGGAGATGG TAGGAATACA TCATTCTGGT TTGATACCTG

233401 GCATCCTTTG GGTCCTTTTT GAAGTTTCCT GAGTCTCTTC TCAAATGCTT AGGACTCTCT

233461 CTTCAATCTA AGGTTGTGGA GTTTATCAAG GATGAAGAAA GGTCTTGGCC TAGAGGAAGG

233521 AGACATACTA CAGTGGTGCA AGAATTTCAG AGAGCTACTC CTAATCTTCT ATTGCAGCAG

233581 TTGCATAGAG AAGATCATGT TAGATGGAAT GCTTCTATTT CAGGAGAGTT TTCTGTTAGA

233641 TCAGCAATGA GGAAACTTTA TCATGCTGAG GAGACAGTAG CATGGTATAA ACTGGTTTGG

233701 TGGAAAGGCT ATGTGCCTAA GTATGCTTTT GTTTTGTGGT TAGTGCTGTA GCAGAAATTG

233761 ATGACTAGAG ACAGACTTAT TAGATGGGGG TTTGCTAATG TATCCCCTAT GTGTGTACTA

233821 TACAGTCAGG AGGATGAATG TCTAGAACAC TTTTTTTTTT AGTGTGTCTA TTCACGTTGT

233881 GTGTGGGATA AGGTTCAGAG GCTTTGCTTG TTTTTCAGGG GTGTTATGCC TTGGAGACAG

233941 GAAGTGCAGT GGTGGTGGGT AGGGATCGGG ACACCAGTGT AATTCCTCAT CTCTAAGTAA

234001 TTGGTTTTAG TAGGTGATGA GGTCCTTCTC TAATTGTTTG AGGAAGTCCG ACCATGAGTA

234061 AGGGCCCATC GAAAGAAGAA AAGACTGCCT CTTTTCTGTC TTACATGGAC TCCGGTCTCT

234121 CTACCTTCAG CGTGCCAAAT CCCAATCTGC AACAGAGCGA GTAGCCTGGT CAACGAGTGC

234181 GAAGGGAGCT TTGGTTACGA ATAAGGTTTT TCTATCGTAG GAAGTGTAGT CGCCAAAAGG

234241 CGAGTTGAAC GAAGGGCCTA GGGAAGTCGG GGCTGAGCAA CCTTTCTCTA GCTTTTTCAG

234301 TAGGGGAACT TGCCCCGGCT AGCAGGAGAA GTCTAGAGAT AGGAAGAAGT AGGCAGAAGA

234361 GCGGTTGATC CTGTCCCGAC CGAAGACAAC GTTTTTTTGT CTATTTCATC TAATGGGAGG

234421 GGCGGCTAGG CGGGTTACGG CGTAGGCATT CTTCAAATCT GTGTGGAAAC ATACGAATAA

234481 GGATTCAGAC TCGCCCTCGT TGGAAAGGTG TATGCCACTC CCCAGTGAAT TGAGCTTGAG

234541 CTGCCGGTGA CCGGCTTTCA AAAGCGTTCC CTCTAAATCT TCTTTCCTAA ACTTCACTCC

234601 TCTCTGCCTT TCGCTTCTAC AACTAAGCTC TTACCAGAAA TGAATTCACT ACCCGGTACT

234661 TGTTCGGTAG GTCGTAAGTA ACCCAGTGCC CGCTTTCTCA CTTAAGGAAA TGAAATGAGT

234721 CGCAAGACTA GCAACGGAAT AGAAGTCAAA TCTGCCATGG ACCGAACGGA ACTTAACTCC

234781 TTGACTCGAT CTTTAATTCA TTTCATTATG AAACTATCTC CTCGTGTTCA ACGATATATA

234841 GTTGCCGTAA TCATACTACT TACCTGTCTT GGTATCTTTT ATTTTCTATT GGGATCGTGT

234901 AATGTTTTTC AGTCTCTACT TTCGAAGGCG GGGTTCTCTC TTGGGAGTAG AGCCCTCTCC

234961 TTTACCTTAT GTAAGTTGGG CTGCTCCGGG GGGCTGGCCT TGGCCATTAG GTGGGCGATC

235021 AAATTGATCT TTTTAGACAC CCTACGCCCG AATCCGTATC ATCCCCAAGC CCTTTGATCA

235081 TAGTCTCCAA TAGGTTCTTC AAGAGATAGG ATGAGGGAGA GTGGAACTTC TAACTGAAGC

235141 TGCTCACCTT TTTCAGCGGG GTAGTCTTGA ATTTACTTAG TCCCAGAGCT CCGGAGTTGA

235201 GAGAGCAACT AAGGTAGAGT TATTCAAAGA AAGGGGCAGG CCCAGAAGAA GAGAAGCGGT

235261 CTTACAGCAA TTGAAAGAGT CCCCCAAGGG AGGATATTAA TTTAAGAGGA ATGGCCGGGA

235321 CGGGACTCCT AGGTGAGAGA GACTAGGGCT ACTAGCCCCT AACTAAGAGA GAAGATGAAG

235381 GAGGTTTTTA CCTTAGGTGG TCGGTCCTCC GCCGGGGAGG TGTTAACAAA CTTATAGAGC

235441 CACTTCATTC ATTTTACTCT ATAAATTAAC GCATTACCAA ACTTGACTTT GAATAAGAAA

235501 TCCACACTTT GACACCTAAC CTAAGATTCC GTAACGAGTA GATACTTCTG CTTTTTCATT

235561 CCGGGGTTCC CATGTATCTT TGGACAGAAG CTTTTCATAC GGCTGTTATT GTTATCAATA

235621 ACCAACCTAC ACCACTTCTA TATCACAGAT CTTCCTATGA AATCCTACAT GGTGCTCCAC

235681 CCACCAGCTT ATTCATCTCT TCGGGCTTAT GGATGTTTAT GCTATGTCCA CATCTTGAAT

235741 TGAAGTCCAT TCGTCATAAA TTTGAGCTTA AGGCTGATTG CTGCATTTTT CTCGGGTACA

235801 GTGATGATCA TAAAGGCCTC TCTCTGTGCC GTCGTCGAGT TTTCATTTAT TTCCATGTCA

235861 CATTTAATGA AGCAACTTTT TATGATCCGC CATCTACAGT GCCTCGATCT CAGGGGTTGT

235921 TGGAGGAGGT GTTTAGGCCC GGTCAAGGCA AATGTAAAAC GAGACTTAGC AGCACGCCTT

235981 CATGAGGAGG ATCCTACTCT CGGACGCGGG ATCGCTCATG CTCCGAGCTC AAAGTCGGAG

236041 GAACAGAACA CGAGGCTTTT TCGACTAATG AAACGACCGA GTAGCTAGTT TGGTTGGTAT

236101 CTATTATGGG TACCCCCTTG TCGGCTCATA CAGCAAGGTC ATCATTCCTA TTTAGTTCGC

236161 TGCTAAACGA AGACGGGAAG AGATCAGGCG CCTAAATAGC TGAGGGAGGT CAGCTGCGCA

236221 GGATCGTGGA GTCGTCTTTT GGTCTCGGAA TTTTATTCTT ACCATATTGT CTACACAAGA

236281 GCCAAGAGAT CAGGGGGGCC TTCGAGGGTC CCAACAGGTG TCACGATCAA GCAAGAGCCT

236341 GAATTACCTA TTGCCGTCCG CGTATTTTAA GGTGAAGGGA ATGAAGCTTC ACAAATATAA

236401 CGGCGCCCCA GTTGGCTTCA GGTCCGAGTT TTTTCGATGG GAGGAGCGCA GCGGGGGGCC

236461 GGGCCGCAAG ATCGATTCGG TTTGGACGCT CATCTCGGAC AGCTGGTAAG GCTGACAGAG

236521 GCCATTTCAT AGTCAGAAAA TTGGGAACTA CGATCACGGA GAGAATTCAA GGGATTCGGC

236581 TCTCAGGTCC ATCAACCTTG CAACATTAAC CCCTGGGGAG AGCGTGTATC GTACTGATCC

236641 AGAGCGGAAG GAGAGCATAT ACCGATCCTA CCAGGAAGGC TGGGGGCGAA GGAGAACATG

236701 GCGGGAGTGA TTGTAGTTGG CTGAGGCGCC TGTCGCCAGC CGATAAGCGA CACAATCTAA

236761 CGTCGTCAGG GGAATTTTGG CGGGACACAG GCTACGAAAC CATGCTTCGG AAACATAGTG

236821 ACTCTTCGCC CTGCGTAGCT TGTACTGTTC ATAGAGTGCA GCTTGTTTTT GAGAGGAAAA

236881 TAGGAAATTG GTCTTCCCTT GAGTCTTCCA TTCATGCCTT CATGGATGGC TACCTATGAG

236941 GTATGGCTTG AAAGCGCTTT TCTACTATAG GAAAATTACA ATACAATAGA GATTTCTGGA

237001 CAAACTAGCG AGGAGTGGAC TCCCAGGAAG AGAAATAACA AAGAGCAACA GACTTCGCTT

237061 CGGTCCCTAC TGCTTGAAGT TCAATCCCCT CAACAACAGG AAGTTGAACC TCCCGCGGGT

237121 ATAGGATTAG GATTAGATCG TACACCCGCA AACAAGACTG CCATGGGCGG CTACCTGCTT

237181 GACTTTCTTT ATCGAGAAAG CACCGCATCA AAAGGGCGGG ATCGAGTGAT TCCCTACCTT

237241 ATTGATATTA TTTCAATTCA TTTTTGAAGT TTGAAGGTCG ACATATTATC AAGCTGAGAG

237301 AAGCTGAAAT TAAGAAGGCT TAGGGAAGCT CTTATTACTA TGGCTTAGCC TAAGACACAG

237361 CAATCGAGTG CGCTGATTGC TCCGGTTGTG CCTGTGTCTG CATCGATTCG TCAGGACCTT

237421 CGAATGTTTC GATTGCACCA GAAGGAGTGG GCTCTACGGG GATTAATGGA ACAGTGCAAG

237481 GAGCAGCGAT TCTTTCTTTC TGCCGCTGCG TCAAATGTAG GCCGTGGTGG GCAAGGGCGC

237541 AGCGTGGTTT CGCGTCGTCT GGACATGGCT ACGCCGCCTA TACCTGAGGA GTCTGCTAAC

237601 TAAAGGCTAA AGGTATGCGT CTTTCCTATA TTGCTCCTAC ACTTAAGCAA GGTAAAAAAA

237661 CTGCTTGTCT GCTTAAGAAT GAGGTTGAAT CTGAAGCTAA GAAATGGGCT AAGGCTATTT

237721 TCCTATATGT GATTGGCGAT ACTCCATCTA TTCATTTCGT TTCAACTTTC ATTGAAAAGC

237781 AATAGCCCTT ACACCTGAAC TATTTGGACA TAGTGAGGGT TCTTTTGTGG TTCGATTTAA

237841 GACTATGGAG GAGAGGAACG AAGTCTTGTA TTCTGGACCT TATACAGTTG CTAATCGTCC

237901 TGCCATAGTC AAGCCTTGGC AGCCTAATTT CCATTTTCAT GAGGAAGTTC TCAAGGTGGT

237961 ACCGTTGTGG ATTTAATTGC CAAATCTACC ACTCAATTGC TGGGGTTGAG TCGCATTGGT

238021 AGTACTCTGG GGAAACCTCT ATGTGCTTCT GACTGTACCG CAACTCAATC TAGAATCTCT

238081 AATGCGGGGG TGATGGTTGA GGTTGATGTT ACTAGACCTT TGGTGAAGGA AGTTCTGGTT

238141 GAGGACCCGT TAGGGTCTGG CATTTGAGCA ATCTATTACT TACGAATGGG TTCCTGATTT

238201 CTGTTCTAAG TGTCAGAAGG CTGGACATGA CTGTGCGAAG GCTGATGTGC ATGATAAGAG

238261 GAAAGGTTGA ATTTCATCTT GTATTCTGAA GGGGGCTTTC CTTTGTTTGT TAACCCTCTT

238321 CCCGACGAGG TCTCCTTCTT CTTACACTGT TTTCATAAAA GACGGTTGCG TAGCTTACTT

238381 GGTAAGGGCT TTTGAAGTGT TTCATAATGC TTATGGGCAC GGGGTATTTT CTAACGGTTT

238441 CATTTCATCC CTTTAAAAAT CAGGTGGGGA CATTCACATT AGAGGGTAAA CCCTAGACCC

238501 ACTTTCTACA CCTTTGCATA AGCCTTTCCC GGGAAGCTAA ATTCTAGCTT TTTGCCTATA

238561 GATACTTTCT TGAAGCTCTA TCGACCCTTT ATTAAGGCTT CATTCCTTCC TATTAACCTT

238621 GATTTAGGGG GCGGCTTTTT AGGGGCTGCC TCTTTTCCCT AGGGCCTATT CCATTCTCCC

238681 TTATGTCTCG GTTTCATTTA CAAATTAGTT CGAAAGAGCT TTAGCTTCAC TGATAATGAC

238741 TTCTGTGTAC CACTACAATC CCTTGCTTGT TCTTTCGCTT TAGAGTTTAA GGAGAAACAC

238801 GCTCTCTTAA TATATACAGG CTAGAAAAAA CGATTCTTGA ACTCATATAT CTTTCCCTAT

238861 AGCCAGTAGA GGGTCTTTCT TAGCTAGGAA CTAGTACTTG TTTTTATTAA GCGGATGATC

238921 CGGACCCAGC TCCTTTCTTC TTTTTATGCC CTATCTGCCC ATCTTCTTTA AGGTCATTTA

238981 TAGATTCATA TGAATAGCCC TTGGAGAAGC CGAGCTACCT GGTATACCCC TTTAAACCTA

239041 GAAAGCATTT TTTCTGGATT TCTTTGTCAC TTAAGAGAAG ATGTCTCCCT TCTTCTGCTT

239101 GTTGCTCATC CCTTTATTGA CTGACTTTTC TTATCTGTCT TTCCTTTCTC TGGGCTGGAT

239161 CGATATCTTG GTCGATGGGC CCATTCTCAA ATGTCTTTCC CTTTTTACCG CTAGGAGTTA

239221 AGCTAAGTCA TATGGTAAGG AGAAGAGAAG GAGAAGTCTT CGCAGCTTGA GCATGTTTTT

239281 GTCCTTGGTG GTGTGGTATA TGGGTGATGT TCTTAAAAAA CCCTTGGTCC TGAAGTTGTA

239341 TAATACCGAA AGAAGGTAAG TAAATGCGAT TAGTGGTACA TTTGTTGGAA AGCCTAGCTA

239401 CTTGATTTAT AAGCCACTCC AGAGCGGTAG AACCAACCCC TTGCGTATCA TTCAAGGCCA

239461 GAACCTTTCT CCTATAATTC TTTATTTTTA GGCATCTATA ACGGGTTTGG CAAATAGACA

239521 TTCCTAACCG AGCACAGAAT GTTCTCCAGT TACTTCTGGG TGCCTAGGTA TCCACCGTAA

239581 GCCTTTCCTC GATTGATTGA AAGCGTAAGA CAGAAACCTT GAGGTCAAAA AAACTAGCTA

239641 TTCTACCCAT AAGGGTATAT TTAGATTAGC TGCCTTGCCT AAAAGAAATG AATTAACCCT

239701 TGCATTAATA TGTGAATGCT CCCTTTCCTA ATAAGTTTTC TGACAACCTT CTAATTGTAC

239761 TGGTTTTAAT CGCTGGTTTA TATCCACCGG TTTTAACCGA ATTCATCCAG GGCGATACTT

239821 GCTCGAGCAA GAGAGGAAAG GTTTTATTAC CATATGTCAT CGATAGGGAC AAGGGCTACT

239881 CTTCAATTCT TTAAATGCCT TTAGCTATGC CTTGAGGAAG ATTGAGATAT CCTTTAAAGG

239941 GGGGCTTACT TGAGACGGTT TAAAGAGCAT TTATTGAATG GGAAATGAGG TGGCTCAGAA

240001 GAGACCGGGA TATGAGGAGA AAGCAGCCGG CTCTTAGCTT CGTAGATTAT GGTATATATG

240061 ATATACTTTT TGCTTAAGCT AGGTTTTACA TGAATTGGAG GTTAGCTAGC TTCAAAGCAC

240121 GGATTTCTCA TATCTCGATT CTGTTGCTTC ATAATAGGAA GGCATAAACC CTTGCATCAT

240181 TGAATGATCC CTTTCAAAGT ATATGTCTCT GCTCATGCTT CATATTGAGA TTCGCTAGCT

240241 TAATAGGTTA TACAATTTAT TCATTCTGCC TGGCAATTAA TAGTCTATTA GCAGCCTTAA

240301 AGTGAATCTG ATTCTCGGTA AAGGAAATAT CTTAAGAGAA GAAAGCTGAG TCTAGGTTGA

240361 ATTTCATCTT GTATTCTAAG CTTGAGCAAC AAGGCGACGG AGCCAATGAG CACCTCAGTA

240421 GCGCTCCGAA ACGGGGCCGA GGAGCCGGTA AACCAGTGCG TTTGAGTGAA GGTTGCGGAT

240481 ATGAGATGGA TGAAACCGAG CTAGAAACAA GTACGGGGAT TACAAGGGAA ACCATTCCCT

240541 AACCAAGAGG AAGATCAAAA CCCTGCAAGA AAGCTTGAAC AAGCGATAAT TCCGATATCA

240601 CATCCATTCC TTGTTCTCTT TTTCTTGCTA ATTCGCTTGA AAGGAACAGC TAATCTACAA

240661 TTAAAGGCAA GGCAGAATTC ATTGATTTTA TGCATGGTAG CTAATCTCAA TCTGTATTCT

240721 TATATTCCTA TTCTAGCCTC GGGATTGATT TGTCCGTTTC ATATATATGG AAAAGTAAGA

240781 AAATAGTCAT CTTATTGTCA GATTTCGTCT GTGATTTCAG TAATTGACGG AACTATTAGA

240841 TTGACATTGA CAATGCTAAC ATTTGCCCAT TTCTTCCTTC TCTATGAACA TCTTAATTGA

240901 TTCAAAATAT GAAATTTCCT GCTCTTCTGT ACTTCACTTC TGGTAAGTCT CATCAGTCTT

240961 CTGGAAATAT CAGGCATATA ATAGATTCTT TGACCGGCTT TGGTCGAGCA ACCGTTACAT

241021 TTCTTGAATG GCCACAGCCT ACATAACGCG TCTCCCTCTT TTCAAGGAAG TGAGTCTCAG

241081 ACCGTATGTA GTTCTCGGTC CTTTTTTTAC AGTTCCTGAC AGGTGCTTTT GTGGCTCTTC

241141 ACTCCAGCCC TGAAGTATTC TGTGAGCCCA ATCTGTTTAA CGTGGGCCCT CCGTTATGAG

241201 AGTTCAGTAA GGAAAGAATC GAAATACGAA TGAAATCAAA AAGGCCATCA TTAGTAAGAA

241261 TAAAGTCAAG AGGGCGTGTC CCCTGCGGGT CTCGCAGAAT TCTGCTGCTG CAGCAGTTCA

241321 GGGCGCACCA TAATCACAGG TTCCAATTCC ACTCCTCTCA GCCAGCTGTA GGAGAATTTA

241381 TGTAAGATAA TAATAGGGGA GGCGCTATGT TTCTGCCGAT CATTCTCTTC ATAAACCCTC

241441 TGCATAAAGT TGGGATAAAA TACAAAGAGG AAATGAAGTA AACTTACGGC ATGAGAACAA

241501 AGATAGAACA AAGACCCAAT CAGAAACGGT AGGCCCAAGA GAATCGCGGG CATATAGTCC

241561 CAAAAGGGAA GCTGGCTTAG CGCCTCCCAC GTCCACAATT TCATGCACGC AATGACAAGT

241621 CCTCCCACTG AAGCAATTGT AGCAGCTCCG GCACCTATTG ATTTTGCTCC TTCTAACATA

241681 ACAGTTTCTT ATTCTTATTC CCCGTACCCC CTTTTTCATT GTGCCTCGGT GGGCAGGTTT

241741 CTCAGTTTGG ATTGTTTATA GTACAAGCTT TCTGTTCGGT TGGTCTTTAT ATCCTCTAAA

241801 AGAACATTTC ATTTTTCTGG TCCATGTTCT TCCGTTAGAA TTTCTATTGC AAATTGGACT

241861 TTATAAGCGC CCCATTTTTG CATGCGTTCT TCTTTTCGTA GCTCGAGGAT TAACTCAGCT

241921 AATTGATCTT CTTTTTCTGT GAGCCATCTT GCCGCATCTT GCGGTCTTTC GTTAAACATA

241981 GTTCTTATCG CCTCTTCCTC TTCGGCCAGT CGGAATATCT CATCTTGTGA GATTTCATTA

242041 GGCCCAGGCC CAGAACTCGA AGCATCCATC ATATTGCTCG GAAAAAAAAG ACTTAAGCCA

242101 CTAAAGAGTG AGAATAATTC CGCGAAGACC ATAATCAAGC TTGATGAAAA GGATACTCGT

242161 AGAAAATACA TATAAAGCGC ACCTAGAAAG AAAATCAGAT AGTAAATGAG AAAAACGACT

242221 CTTTTCCCAA ATAGAAGAGA TAAGCGAAAA GAGTAGAGAC GATACAAGAG AACAACACAA

242281 AAAAGGACTA TTCCCATAAA AAGATAATTT TGACCACTGA TTACAATAGA ACTGCCTTGC

242341 CCGACAAAAC CATATAAAAT AATAACGGTG AGACTACTGA TTAAACACCC CAGGAAAAAA

242401 TGCATTTTTC TTTCCATGAT TCCAAAATCT TCTTTTGTTG AGGGAGAATG CCGCTGCCGA

242461 TTGCCTTTTT AGGCTCCAAA GCAAGATTGG ATCCATAAGG CTCCTCTTAG CGAGGCGAGA

242521 ATGATGAGTG GGGCAGGTTG TGACGAACAA TCGAGCCTTT TTTATTTTAC TACTATCGAA

242581 CATAAGATCT AGGAGAAAGG CGCAGGAGCT AAGATCAGAA GCCTTCCGTC CATTCCTAGC

242641 CATTAGCTTT TTGATCTTTC TCCTGACTTG CGCATCTCCT CTGCTTGTTA GATCTTTTTT

242701 TTCTTACGAG ATTTTTGACT ACTTATTCTA CCTTTACGTA CCTTAACCTG GATCGGAGGA

242761 AACTTTTCGT TGACGATCTT AAATGTCGTA AGATTCTACT TTTTTTCTCA ATTTCATTTC

242821 ATATAACACT TGCGACTCGA ACAAGAAAGA AGAAGGAAGG TTGGGTCGTA TAGAGGCAGC

242881 TTAATTTAAT AGACTAGAGC TATCTAGTAT TAAAATATTG ATTCAAACCG GCATTCAAAC

242941 CAAGCCTTTG CAGCTAAAGC ATAAGCTCTA TCCTTTTTCC CAATCGATGA CATCAGGCTC

243001 GAAGACCTTC TGCCCTCTTC CCCTCGCAGT TTGAAGCCGG TGACCTATTC CCATTAAAAG

243061 AAAATTCCTC TTATTTATCA GGGTACTACT TCGAAACCGA GACTCAGCTT GATTCTCTGT

243121 ATGATATTTC CTTTCCTCGG GAAAGACTTT CAAAACCATA CACTTGTTTC AGACCTCTCC

243181 CTCTCTTCCG CCCTCAGTTT CACTCCGGGT CGTCCGAAGA AGGACAATAG CAAACCAAAA

243241 CCAGACGACT AACTTGACCA ACGCAGCAGA AGGATATATG AAAACAAAGA AATTCAAACA

243301 CAGCTTATTC CTACTGCAAA GGGTAATCCG GCTCAACCAT CCCCTCCATC TCTCAATCCA

243361 CCGCAGCCGC AACCAATGAT GTCTTTCAGA GATCTTGTTT CTGGTAACCA TGGCAATAAC

243421 ACGGATATGG ATTTCAACAA TGAGGAGGAT GAAGTATCCG ATGATGATGA ACCACCACCA

243481 GATATCATGG AGGATGAGAA ATGCCCTGTA ATCCTCTTAT CTAAGGAGGA GAAAAGAAGA

243541 TTGAGACAAC CCTGGAAGTA TTCGCTCATC ATCAAGTTGT TTGATGGAAA GGTGGGTTAC

243601 ATGTCTCTGA TGAAGAGGTT GAAGGCCAAA TGGCAACTCA AGGGGGTCCT TAACTGATGT

243661 CGGTAATAAT GACTTTATTG CCCGTCTTTC GTCCATGGAT GACTACAATC ACGTCCTTAC

243721 ACAAGGGCCA TGGTTGCTTG GTGACAACTA TTTGACAATA AGGAAGTGGG TACCTAACTT

243781 CATTCCTGAC AATGACTCGA TCAAATTCCT CACAGCATGG GTACGCATCC CCAATCTCTC

243841 AGTTGAGTAC TTTGATGAAA CCTTTCTGAA GAAGGTTGGA AGCAAAATAG GCAAGGTTCT

243901 AAGGGTGGAC AAAACCACGG CAAAGGCTGA AAGAGGTCAA TTCACCCGCT TAAGTGTGGA

243961 AATTGATCTA ACGAAGCCAC TCTTGTCCAA ATTCTGGTTG AATGGTCAAA TTTGGAAGAT

244021 TCAATATGAG GGGCTCAAAA TGATTTGTTT CAAATGTGGA AGGGCAGGGC ATAAGGGGAT

244081 GGCATGCGAG GTGGAGAAGA ACTTGGAAAA AACCAGGATG ATGGTGATGC TGATTCTAGA

244141 AACCAAATCG AAGACAATGA TTATGGTTCT TGGATGCTTG TTAAAAAGCC AATGCAAAGG

244201 AGGAAGTCCA CCAAACAGCA GGTGCAACAA CCACCAAATC CGACCACCGC AAATAATAAC

244261 AAATCAACCA CCATATCAGT CCAAGGGCAA TCGGGTGGCG CGGCAAAGGG TGGTGGTTCC

244321 AGATTTCCAA TTTTGGAAAA CGGCTTTGAA GAGGAAAGGG CGCAATTTCA GGGAACCAAA

244381 TCCTCGGAGG ATCAATTCAT TCTTGAAAAT TCGGAAATTA ATAAAGAAGT TTCCTACAAT

244441 GTGGCAACCG TTGACTTGGA TGCTGATTCT CAGTCTTGGT CACAGGAAAA TCCTAATAAA

244501 TCCTTTCATT TAGGAAAATT TTCTCCAAAG AAAAGAAAGA AATGGTACCC TTTAGGGGAA

244561 AGAAAAGAGG TAACCTTGTT CCCAGCCTTT AGGAAAGGAG TTGGCTCACA TCTTTTGTTA

244621 ACCTTATTCA AATGGGCTAC ACTTCAATTC TTTAGCGAGG GTAAGAGGAA GATTGAGATA

244681 TCCTCCTTTA AAGGGTACTT GAGAGGGGCA ACAGATCCTT TATTTCAAGG AAATAATAGC

244741 AAGTATGGGA AATGAGCAAG AGGAGTGTTC TTATTTCTAA AGTATGGGGT ATGTATACTG

244801 AATTGAAATC CTCTACCCTA GCACGCTATA CCCGACCTAA GGCCGCTGAT GACGACATTA

244861 GACTAGATTG ATTTAACCGA TACCATCGAA GGGTGGTGTA AGGTTCCGTC TTTAACTAGT

244921 AAGGCTGAAG GATTTCATTC CGGATTGTCC GCAAGGATCA TATTGAAGGA AAGGAATATC

244981 AATCTCTATC ACTGGTTTTA CTTAATTGGT TAAATACCGT AATCATCGAT AGCTACACTT

245041 GCTCTAGCAG CCCAGTCTTT GTTAAACCAT ATTGATTCGA TAGCGGGTTT GATTAGCTTG

245101 GGTACAAGTT TTCTTGAAAG AGTGATATCA ATCAACAGCT TTTGCTGCAC CTGTCCTATC

245161 GATCGTGCCT CTTTCGAGGA CTTCGCTGGG AATAAATGCA TTAGCCGGTG TAAGCTCCAT

245221 CTTGGGTGCA AGGGAACCCC CACCTACACT AGATAAAGAG GAAGCTGTAC TTTCAATAAG

245281 GCAAAGGGTT TTTCAAGACA ATTAGCATGA AAGTGATCAT AAAGTTTGAG CTGACTTGTT

245341 TATAGATAGG AATCAGGGTG CCAAAACCCC GTATTTTTCG TCATTTTTCG ACTCAAAATA

245401 GGATAGAAAG ACAAACCACA TACCTATGAT TTTTAGAAAT GAATAAAGAG TGAAACACCT

245461 TATTTTAGGC AATTCCGGTC CTTATTTTAG GATGAAAGAG CTTTTTCCCT CTAAGCAGCT

245521 GGATCCCAAA TCGGAATAGT TGCATCCCGT ATAGTGGCAA ATGTTATAAA GATGCTCGGC

245581 TCACTAGTTC TCTAACCTTT GAATTCTTGA TTGCAAAGAC AGTCTTTATG AAAAACCGTG

245641 ATTGGTGAGG GTGGCGGACA GGGACCCAAC ATAGGCATTT TGTCTCGGTT TCATTTGAAT

245701 CAAGATTCTC GGGAAAAGGA AGAGTTTTCT TCTTATCCGT GGTAGAGCCA AAGGAGAGGT

245761 TCTAATGCTA GATTAGCCGA TAGGGAAAAA GGGTTTAGCA ACACTGGTTT ATTGAAAATA

245821 GATTCCTCCA TAGCGCCACT TGCTTTAGCA ACAAAGGAAA GATCACTCCG CCTTATCCTT

245881 TCGATAGACG AACCAACAAG CGAGGGATGA TAAAGAAAGA CTGATTGAAC CTATTCCACT

245941 CTTCCAGCTA GAGACAGCTT AAGACCATTC CAAGAATTGA GTTTGGCTGC CATTTTCTCA

246001 ATAAGAGGAG CACAAGAAAC CATCTTTCAA CCATGACAGC ACAGTGGTAG ACCAAGATAA

246061 GGAACTGGAA GGCTACCAAC TTTGCAATCA AAAATAGAAG CTATGGTTCC CTTTCTTCTC

246121 ACTGATGAAG TCCTACCCCA CCCACAGAAT TTAAAGAACC TAGGGGAGCA TGAGTCATAT

246181 ATTCTGCTGA ACGTCGTTCT TGCCAAGGCT GGATGTCTTT TTTCAGCCGA CTCAAGTCCA

246241 AACCATTTGG ACCCCTTAGG GGTTCTAACC AAGGAGCGCG CAAATCCCAA AAACGCATAG

246301 TTTCTCCCCC AAAAATAACT TCTCCAGTCG GAGAACGCAT TAGATACTTA CCTAAACCAG

246361 TAGGTCCTTG AGCGGATCCT ACGTTAGCTC CAAGACGTTG GTCTCTAACT AAAAAAGTAA

246421 ATGCTTGAGC TTGAGAAGCT TCGGGTCCAG TGGGCCCGTA AAACTCACTA GGATAGGCAG

246481 TATTATTAAA CCAAACAAAG CAACAAGCAA TGAAACCAAA GACAGATAAA GCACCCAAAC

246541 TATAAGACAA ATAAGCCTCT CGTCTTCTTC TCCCTTTCAT TCCTCCTTGC TTCTTGGGGA

246601 AGAGGGAAAA GGCAACGGTT AGAAGAGGGA AGCAGTACCC AACCAACTTA TCTAGAGTGT

246661 CTAACAGACG TAGAGTGCCG AGAGAACCTA CCGAGTTTAC GACATGGGGT AGGCGACCTA

246721 CCTGGTAGTT ACTGGGGAGA ATACGGCTTA CTGTCCAGCA ATGGAGTGAG GTCCCTGCTA

246781 AGGGTATATC CCGAGGATCA CCTTTAACAC ATCTCATCTT CTGCTGACCC AAGGAGAAAT

246841 TGCCAGGGCC CTTGGTGAAG TCGACCGACC GAAGCTACAC TCCCAACCTC CTATACAAAA

246901 CTATCTACCC TTTATCAAAG AGAAACAAGG TAGATTAGAC TATTACTGGT GGGCGAAGGT

246961 ATGTTCGTAT GGTTAGTCAA GGAAGTCAGT TAGCAGTTAT AAGAGACATA GAATAAACCA

247021 GATTAGATTA GACAAAAGGT ATCCTAGCTA GGACTTACCG GCCGGACACT GTCTTTTATT

247081 AATACTGGTA GTTGACGCTC ACGGGTGTGT AGCGAAGTGG GCTGGAACAG CATGTTCTCG

247141 CCTAGGCTTA ACTTACGACG AAGGACAGAC AGTAGGATTT GAACCTAGCG TCTCCCTCGA

247201 ACGAAGTGGT CTATCAACGT TACTTGGATC TTAGCTTCAC CTTAGCATAT ACTATACTAA

247261 GCTCTTCGAA CCTTCGAAGA GAAGTCCTTT TATGCGACCT TATGTTTAAA TAGGTGCTTC

247321 TGAATCAACG CTCTCATGCT TGTCTCGATC GACGATTCTC AGATGTATAA GTACTCCTTT

247381 CCTTGTAGTG AACGGGCAGG TCAATAGCCA TGCCCCACGC TACCAATAAG CGCTCCTGAT

247441 CACTAGTAAG GCTCACCAAG AACCGTGTAT CCCCCGTGGT GGTATTTCAG CGGTCACTTA

247501 CGACATTCAG GAAAGAGTTA ACTTATGCAA TTTCCGATCA TTCTTAACCT ATAATTTAGG

247561 AGAATTCTTA ACCTTAAGTA TGAGTAGCTA TTTCTTTTCT TTATACGGAC TCACTCTTAG

247621 GAGTATGTAT TCCGTAGGAC TGACTACTAT GTCCTTCCTT CTTGCCTTAT CGCCTTAGTA

247681 GGACCAAAGC CTCCCCTTTG ACTACTTGCT TCGTCGCTCC GTTAGTCGAT CTAAGCCGGA

247741 TTCCCCCTTT CCTACTGTAG AAGCGTAGGG GACAAATCTA CTATCGAATT CCTTCAGTCT

247801 TTCAATACGA CGGAGATGTC AATCAAACTT TTTTCCTTAA TAAGACCCCG CTCCGGCGGA

247861 CTTTCATTAA CAGACAGGCA GAAGAGGACT CTGGGAGGAA GGTGTAACGG TAGGTGCCTT

247921 ACTTTGGGGT TTAAATTAAA TAGGTGTACT AGAGAGATCG TTGAAGCTAA GGGCCAGGCT

247981 AAGCAAGCAG GATCCGGGCT CATTCTCGGG ACTTCGTTTA GCTCTCCCCC TTTTTGTTTT

248041 GCCTTAGTAC TAGGCGCGGG TGAACGAGCG AGAGTCTGTG AGCGCTCCTG CGTGTAAGCA

248101 TGGACGATCA GTCATCTAGG ACTGATTGCG AAGAAGCAGC CTACCGTAAA TGATCGATTC

248161 TCCTTCCTAT TCGCTTATTT GACTCGTCTT AGGAGAGGAT TGCGAACGCC TTTGCTCAGC

248221 GCTTGTCTTT CCGCACCAAA ACGGAAGATC TATCTATCTT GCTCGGGATG CTTACGTGCT

248281 TCCGCACCAG ACTTTCTTGC TTTTCCGATA GCCTTTAGTA TAGGAGCATC TCTAGTGGTC

248341 CCGCCTAACT CTTCGTTATC TGTCCGAATA CCTCTGACTA TCTGCCTCTG TTTCACGAAT

248401 AAGTTAAGGG ACTAGGAGTA CCTGCCGGAA TGAGCTTCCC TCGTTGATTC TTTATACTTA

248461 AGTATAGCCT TCAGACAGAA TGAACGGATC GAAGACCGAT TCTGATCTCA AAATGAACCT

248521 ATCCCTTCCG CCACATATAC TATATGTCGC TCTTCAAACC TTTCTTTTCT ACGCTACGAT

248581 CTTTCTTCTC TTATGGGTTT TTACTTACTT TCTTCTTAGG AAAGAAGGAA GAAGGCCATT

248641 GATCTTATAA TACGTTACCG GTGTACTTAC TTCAACACAA GAAGCGTGGG CCTCTTCGAT

248701 AGAAGCACTT TCCTTTGTCT TGGTCCCAAT TCAACTACAT CCGCTATAGC ATTTCAAATA

248761 AGTGGTTATT GAGTTCTTAG CTATTGCATT TCTTTTTCTT ATTGCTGGTC ATATGTATAG

248821 AACGAACTTT GGTCCCAAAC TCCTTAGGGT TTCATTGTTT TTGGATATAA GGGAAACGTA

248881 AAAGTTCCGA ATGCAAAAGA TAGAAACAGA GTTGATAACC TCACGGAGGG GTTGAAAAAC

248941 GTCAAGGGTG GTAAAAACAG GTATTTTTGC GATGTTGATT ATGCGACAAA ATGGACAAAA

249001 AGATGTGTCG ATAGGCTCCT TTTTCATAAT GTCATAAGAT ATGTGTTTTT CTAAAGTACC

249061 TCTTTTGCAT CGAAATATAC GGGGTTTCGG CAACTTTTTC CGTCCATCGG CTCCAGAAAA

249121 AGGAGAAACA TATTCTATTT GTCCCAGATT GGGTGAGAAG GATTTTACTA GGGCCTTTAG

249181 GCTCAAGTCG CGTAGAGACA CGTAGGTTCG AAGACTTAGA CGTTAGTCTA AGTGGCGAAA

249241 GAGCTTCATA TCGTCGTCTT ACGACTCAGT GGCTTTAGAG CTGAATAACG CCCATTAGGG

249301 AGGGCTCAGT GTTGATAGAC TCAAATAGCG CAGAGGAGAT GCGCAGGGCC GAAGGCTCAA

249361 GTCTCGTAGA GACGCAGGCT CTTTAGAGTC AAGCCCGATA GGGCGCAGGG GGGTTTCATA

249421 CTCAACCTTT TTCTTCATTA GCTGGCCATC TGGACCCTCA ATGAGCAAAG AAGAAGGCAT

249481 AGGGACAGTA ACATCCACCT CAACTAGCAA TAACGCAAAA GAGATACGAA TGGAAGTAAA

249541 CTCATCAGCA TAAAGAGGCA CCCCTAAAGC ACTACCAATT CGACTCAAAG AGTCATTGCT

249601 CCAACAACTC AATGGTAGAT TAGGCAATTT AATCCACTTC CAAATTTCAG TATGAAAATG

249661 AAAGTTAGGA GTCCAAGGCT TGACAATAGT AGGTCTACCT AGTATAAGTA TAGTATGAGG

249721 ACCTGAATAT CAAATATCAT CCCTGTCCTC AATAGAAGCA AAATGAATCA CAAAGTATCC

249781 ATCATCATGC AAGTAAACAT GGGGTTTCCG AGTATGATTC CAGTCTTTAG CAATAAAACG

249841 AGATATAGCA GCAATTGTAG GCGTAGACCC AACCACATAC AAAATCATAG CAGATTCCCG

249901 CTTAGTAGCC AGAAGCATCG GCTAATTCAA CAAAGGCGTC ACAGGCCTTT GATACCCACA

249961 ATTTAGGCCC GCCCACCACG ACAGGCTTCA CTACCTTGTT CAGGAAAGAA GTGCTTCCAC

250021 TGCAGCATGC AGACCCATCC GGTGACTCAG CTTGGGAGAA AGAGAGAAGG GAACAGGCTT

250081 CCGACTAAAG GTAGGGTGAG GAATCGCCTA AAAGTTGCAA CTTACACTTA TATACACCGG

250141 CTTACTCTCT TTCAATGCCG TCGATATTGC CGCATCTATC AACTCATGCG CATCGTCTAT

250201 CTTATTAATG GAAGAAGAAA GAAATCGATC CGCTAAATTC TTCTCCGCTC GCACATAGTC

250261 TAGAGAAACC ACACCGTTCA CAAGAAATTG TCTCACGGAC TCATGCCTGA TGCGTATGTG

250321 CCTTTTCTTG CCATTATACA CACTGTTCTT GGCAACGGAG ATAGCTGCTT GCGAATCACA

250381 ATGCACCCAA ACAGGAGGGG TCGGCTTCCC CCACAAAGGG ATATCTGCGA GAAGGTTTCT

250441 CAACCAATCA GCTTCCTGTG TGGCCAAATC CAGTGCTATA AACTCCGACT CCATCGTCGA

250501 ACGAGCAATA CAAGTCTGCT TTGAAGACTT CCAATTACCT GAGCATACTC TCCCTGAGAA

250561 ACACCGTTCC CAGTATTCTT CACCAGATGC ACATTTGGAT CATATGGGGT TTTCACCGGC

250621 ACTACATCGA AGCAATCCAA TTTCCTCAAG ATCTTTTCCA CATAATGTGC TTGAGACAAT

250681 GTGTACCCAT TCTCGGTCTT TATAGCTTTC ACACCGAGAA TCACATCCAC TTCTCCTAGG

250741 TCTTTCATCT CGAACTTAGA AGACAAGAAT TCCTTAGTTT TGTTAATGGA ATCAATGTTT

250801 GCACTAAATA TCAGCATGTC ATCAACATAT AAGCATATGA TCACGCAATC ATTTCCAAAC

250861 ATCTTCGAAT ACACACATAC ACACATGCAT CACCATCATT AACCACAAAG CCAAAACTAA

250921 GAATAGTATT ATGAAATTTG TCATACCATT GCTTCGGAGC CTGCTTCAAG CCATATAACG

250981 ACTTCTTCAG CTTACACACC TTACTCTCAA TGCCGAACTT ATGTGAGAAC CCTATAATCA

251041 CAAGCCTTGC CTTGAACCTT TCCACTGTGC CATCTTTCTT CATTTTCCTC TTGAAAATCC

251101 ACTTGCAGCC TATAGCTCTA TTACCTTTTG GTAGGTCCAC CAACTCCCAG GTTTGGTTTG

251161 CCATGATGGA TTCAAGTTCA CTATTGATCG CTTCCTTCCA GAAACTCGCA CCCACGGACC

251221 CCATAGCTTC TTCATAGGTT TTGGGATCAT CATCTACTAC CTGTAGACAT ACCATATATT

251281 TCATCCAAAC CATCCACATC TTGCATCTCA GTGAGGAACG CTGTGAGAAA ATCAGGCCCG

251341 AAACTCGTTT CTGTTCTTTG CCTCTTACTC CCTCCTCTTA GGTTGTTCCT GATCATCAAC

251401 CCTCGTTTCA ATTTGCTTAC CCCCACATGC TCTAGCAATA GCGTTAAGAA CACCCAAATC

251461 GCCAACGCCA ACAGTGAAAG TCACGACACA GCACACCACT TTAAAGATGG ATTCAATCCA

251521 GCTAAAAGTG TCCCTTTGGC TACCTTGTTA CGACCCGACA ATAGACTATA ACAAGCAAAA

251581 ATCCCGAGAA AACGCGAACT TGATTGTCTT ATGTTTGATT TTATATAAAA CACTTCATCT

251641 TTAAGCTCTA CTTTAGTTGC TTTTATGCTT GTTCATATGA AAAGATTCAC ACAGCATGTT

251701 TTTCAGAGAT TCTATTTCTC CCATATCATT TCCTGAAATC AGAAGATCAT CATCCACATA

251761 GATGAGAACA AGAGTAATGC TTGCAGAGGT GGTCTTTGTG AACAAACTAT AGTCAGCTTT

251821 GGATTGGTGA TAACCAAAAC GAAAGTTTAA GAAAGCTTTG AAAACCACTG CCTTGGAGCT

251881 TGTTTCAACC CATACAATGA CTTTTTCAAC TTACATTTGA GCTTGAAGTT GTACTTGGAT

251941 CACAGTTCAA CTGAATTCTG GAACCTTTTC CAGTGTACCC CAATGGCATC TTCATGTACA

252001 CATTCTCATG CAATTCTCCA TGTAGAAAAG CATGAGTCAC ATCCATTTGT ACAGTGTACC

252061 ATTCTTCCAT TGCAGCTACT GCTAAAACTG TTCTTACAGT AGTCATTTTT GCAACTGGTG

252121 CAAATGTCTC AGCATAGTCT ATTCCATGCT GTTGTTTGTT CCCGAGCACT ACCAACCTTG

252181 ATTTGCACCT CTCAATCATT CCACTAGGCT TTAATTTGGT CTTGTATAGC CATTTACATC

252241 CTATGGCAGT CTTTCCCTTG GGAAGATCAG TTACTTCCCA AGTTTCATTT TCTTCCAATG

252301 AATGCATCCA ACTCTTTGTT CATAGCATCT ACCCTTGTCT GATCTGTTAC AGCATGTTTC

252361 AAGTGAATAG GATCATGAGA TTTAGCCAAA GTGGTCAGGA AACAATAGAA AGAGGGCTGA

252421 ATGGGTGTTA TGGCTAGATT TGCAATATGT GCAGTGTTAG CACCTCCTCC TTTCTTGCTC

252481 TCATAATCTT TCATCCAAAA AGGAGGAAGA TGAGGTCTGC TTTACTTTCT CAGTGGTGCT

252541 ATTGGTGCAG GAATTGGACT GGCTTGTGGT TCAGAAGATG AGGATGGTTG TGTTTGAGGT

252601 GATAAGGGTG GTGTCTGAGG TTCTGATGCA GGTTCTTCTT CTTCTAGTTC ATCATCTGAG

252661 AAGTCAAGAT CATCAACAAC AGGTGTGTGT TTTGGATCAA TTACAGGAGA GCAATAATGA

252721 TATGGTTACT GCAAATCCAT CTTTGGTGCT TCAACAAGAT GAGGTATGCC CAAAATCCAC

252781 TCATGGAATT GAGAATAATG GTATTCCTAT CTTTCAATTG TCTATGGTGG ATGTAGCTGA

252841 TGAACTTGCT TACTGGGAGA TGGGGGGTGG AATATCCCTC AACTGGAGTT ATGGAATAAA

252901 TCTGCTACTA TTAAGCTGCT ATGGAACTTG GCTAGAAAGG CTGACTCCTT ATGGAGCGAA

252961 GCTTCAGTAG CGTTGATAGA CTCAGAGGCG GAGCTCCAAA TAACGTTGAT AGACGCGGGT

253021 TCGACGAAGT CTCGTAGATG CGGCGGTTCA AAGACAAGTC GATAGACGTT ATGCTACTTG

253081 AAGAAGAAGC GTTTTAGACA GCAAAATTAC TTAGGTCGAT AGACGCAGGG CTGCCGCGCC

253141 TTTACCTTGT TAGAGCTCTT CTTATGCCAT TTTCTGCAAG CCACTAGTAA TTCTCGGCTC

253201 AAAGAAGTCT CCTGGCTCAT ATCAGCTCCT GTTTCTATTG ATCCCGTTCT ATTACCAGAA

253261 TAAGAAGAAA AGATGGATTC TTAGCAGGAC TAGTCAAAGA AAAGAAAGTG GCGTTAGAGC

253321 TGACGTCAAT AGAGTCAGAT TCTCCGACTT CAGTTCAAGG TCGATAGACA CCGTCATAAG

253381 TTAGACACAG TGGCGCAGAG CTGAAATAGC GTCGATAGAC TCAGTGGCGA CGCGCTGAGC

253441 CGACAGGCGA AGGGTCGAAG ATCCAAGCGG CGACGGGGAG GATAATCTGT TATTAGCTTT

253501 TGCTTTTGCG TCCGTGCTCG CGCATTCATT TACTAGAAAG TGAGCCTCTT CAGCTTGAGC

253561 ACGATCTGCT GCGGATGAAT GGAGGGTTCT TGCTGCTTTA GGCCCTTTTA TTGAAGTCTT

253621 TTATGATGGC ATTAGATGCT TCAAACGAAG GATTTGGATA GAGGAAACTT AACTTGTCAT

253681 AGAATTGATG TTTCGATTGA GGCTATAAAG ATTGAATCAG TGAAGGGGTA GCCTGGTCAA

253741 CCAGGCAAGA CGGAAGAACT TCCTATATGA CAGGATCGGC AAGCCAAGAA AAGCGAGAAG

253801 GAGCTCAGGG TAACCTCTCA ATCTCGTAGT GAGCGGGGTT AACTCAATGA GAGTAGACGG

253861 TTTTCCACGT GGAATGAATA ATATAATCAT AGGAAAGAAT CGTATGATGA AGAGTGCTAG

253921 TTTTTTACAA AGATTTTGGT GCACAAGAGA TTCTCTAACT AAAGAGTATG TTTGGGAACT

253981 AGCCCAGCGA CCCTGGATAG CGATCCCTAG AGAGAGAGGA AGGAAACTGC GCATGAAAGG

254041 GCAGAGAGAG CGGGGGTACT TCAGGCTGCT GGTCACGCTC CAGAGCTTCC TAATAGGCGC

254101 ATAGGAAATA ACTAAATGCC CAGCTACTCA ATACCAACTA GCAGTTCATA TTACAGAGGT

254161 AAGCCCTTAT CCCAGTCCTT TGGAATGGAG GGACGGGCAA GCAAGATGCC TTTAAGAGTT

254221 AAGAGTGTAC GGAGGTAGGA AAAGCGGTCT CTTAGACAAA TAGTTGTGTA ACGAAATAAG

254281 ACGCTACTCG GATAGCTTCA GCTAGGCGGA TACGAAGGTT CGGAGACTTA GACGTCAGGC

254341 TAAGTGGCGC AGAGCTGAAT AATGCCGATA GGCGAAGTAG CGGAGCCCTT TCTCTTCTAG

254401 TATAGACGCC GGTTCGGATA ATTTTGGAAA AGCTTGATAT AGCAGCTGAA CTGACACTAC

254461 ATCTGCTCTA GACAAGAAAA GAAGGTCATC TGCTTTAATC ATGTGAGTGA TTCCCAGCTT

254521 CTCACATCTA GAGTGGAAAT TGAAATCAGA ATTCAACCTC AGCTAGACAC CTGGAAAGAG

254581 ACTCCATACC AATGGCAAAG AGAAAAGGGG ACATGGGGTC TCCTTGCCTC AAACCCTTTT

254641 GTTGGTAGGC ACACCATTAA TATTAATAAG AATGGAGTAA GAAACAGATT GCACACACCC

254701 CATGATCCAA TCCACAAATA CACCAGCCCA GCTCATACAA CATTGTTTGA AGGAAGGGAA

254761 GCTCCATTCC AAGGATCCTC AAATCCACTT TAATCATGCA CCTAGGTGAA ATAAACTTGT

254821 GTGTGTACCC TTTCATAAGT TCAGTAGCCA ATAAGATGTT ATCAGCTAGA AACTTCCCAG

254881 GGATAAACCA AGCCTGTGCA CTGTCCACCA CTTCTCCTAT AACAGCTGCC AATCTTGCAA

254941 AATCTTGGAA ATCCATTTAT AAACTGTAGA AAGAACAACA GGCTATGTAT GCTATGGGCC

255001 TAAACTCCTT CACATAGGTA GGATGTTGAA CCTTTGGCAC TAAAGTAATG GTAGTACAGT

255061 TCACTTGCTT TAACATCTGG CCAGTGCTTC AAAACTTCTT CACTGCCTTA TTTATATATA

255121 TCAGTCTTTA TAGTCCCCCA AGCCTTTTTG AAAAAAAGAG CACCAAAACC ATCTAACCCG

255181 GGAGCCTTGT CATTGCTAAT GGATTTAGAA GCCTGGTCAA TCTCAGCTTC CCCAACTGGT

255241 TCGTTTACTT CGAGAGAGAG AAAACTATTC CTACAGCTTT TTTAGAATAC AATACAGAGC

255301 TTGAGCCTGA CAATAAGCTT GACTTCAAAG ACTTTAAAGA AATTTCTCTA TGATATGCTT

255361 TCTAGGAAGT AGAAGTCCTA GAACCCTTTA CCGTGACGGA AGAAAGACGA ATCTTTGTAC

255421 ATTCCACATC AAACTCATCG TATTGAGAGT TCCATCCCAA CCCATCATAT TCAGCATGCC

255481 CGCGTAAAAC CAACCAGTTC TAGCAGTATA AAAAAACTGG ATATCAAAGA CGCGAGTCAA

255541 CCTCCTTTTT CTCTCCTTTT AGTGTTAGTG GCCAAAATTC TCCTTGCCTT TCATTGTTTG

255601 ATCGAGCTGA TAGCGTGCAT GGCCTTGGGC GAGTGTATTG ACTATAGAGC ATACCAACAC

255661 CGAGCATAAA GGCTTGTAAG TGAGCGCATT TGCTCGAGCG AACGTATTTC TTCTCTTTTT

255721 CTTTGGCTAG TCCCCGAAAA TGCCCGTTTT TTGAGAAAGT TGGGATTCTC TTCTTGTTCG

255781 ATTCTTGATA TAGTAAAAGT AGACTCAGTG GCAGTTTCTA AGGAAGATCG AGGAGGACCG

255841 CTGGTGTCTC GACGACTAAG GGAGAAGAAG CAAGTGTCAG CTTCATTGTG CGTTCCGGTT

255901 TGGGTCTTCT TTTTTTGAAT GGGTGGACTA TCGCGATGGT ACAACAACCT TCACTCTAGT

255961 CGACTCTTAG AATTAAGCCT TTTCGGGGAG TTGGTTTTAG TGGTCCAACC TGGTATATGT

256021 TATAAAATGA ATCTTTTAAG TCTCAGCTCC TTACCTATCC ATTGAATGTC AGGCCATATA

256081 CCTTCTCTCT TGCTTCCATG TTCCGTCTAC GCCGACAAGG CATTAGCCTC TTCGAAAGAA

256141 AGGAAGATGG ATGCCCAAAC CCTCTATTCC ACTTTTGTAT GTATAGCTGT AGCATTGAAC

256201 AATCCGCTTC TCCCGCCCAC CAACCCTTGA TGAGCTAGCC GAGCAGATTT AAGGGATTCT

256261 GCTTGAAGAA GATGAAAGAG CAGAAGCTTG GATTGGAGAG AAATATGAAA GTTCTTTCTT

256321 TCACCTGGCT TGAGGAAATG ACCTGACTTC CGGATCTCCT AAAACCAAAA AGTATTCCTT

256381 TCTTTTTCTT ATGCTTATGG AGAATATCCC AGAGGGAGCC CTGATCAAGA GCGACTGTGT

256441 CAAAATCAAA GCTGGAATCG CTTCAAGCAC ACTACTAAGA ATGAATACGA TCGGCAGGCG

256501 TAGGACAGGA AGAGCAGAAC GCATCTTTCA CGGATTTGAT GATAGCTCGT GCAATCTTAG

256561 AAAAAAGCCT TCTCCATACT CTATCTTCTA AGTGAATTGG CATTACCTTA GTCTTGCAAC

256621 GTCGCTCTTC GAATCGCTAG CTTTCTAAGC TAAGCAAGCC CGGTTCTCCG GGCACTACGG

256681 TAGGACGTGG ATCGATCATG ACGAGAATGG ACTTTTCTGT AATGTAATAG AAGAGTCACA

256741 GTCCAGTTCC CCCGGCTATC TCTTTATTCT TACTAGTCAG AATAAGAGAT ATGAATGAAA

256801 GCGGGTAAGG GCTTGGCTTA ACCCTGTGTT CTCTCCTAAT CAGGTCGGGG GCGGAGACCG

256861 GCTTCATCAT TCAGTGGTAG AGTGTTCATA GAAAAGAAGG CGTCGCCCAA CGAGTGGCAG

256921 ATTTTGGTGG TGGATGCTAA GGCAGTTCCT TTTTTCTGGT TTCTGGAGAG AATCTCGCTC

256981 ATGGAGGAAG AGTACGCGTG CTAGCGCGCT ACGGCTTAGG CAGTTGATCG GATCAGATAG

257041 CCCTTCGGGC TACCGCACAT AAAATTCCGA TCAACAACTT GGAGGTATGG CTGAGTGGCT

257101 TAAGGCATTG GTTTGCTAAA TCGACATACA AGAAGATTGT ATCATGGGTT CGAATCCCAT

257161 TTCCTCCGGC GCGGAAGTGG AACGAGCGGG CGAAATTACG TGAGTGAGAT AAAGAACCGA

257221 ACCCTTGGTG GAGTCCAGTC CCCCGGAGGA CTGAATAGCA GCACCACTTA GTGACTAGGA

257281 GCAGAGAGCC CGTTGCGCCT TGTTTTTTTG ACCGGCCTAT CTTCTTTCTA TAAGCAAGCT

257341 CCCTCCGGCC GGTAGGTACC TGGACGGCTC TCGGTTCTTG AGCATGTTGG GGGATTAGGC

257401 GGCAGTTGAA AGAGCTGCTC GAAAGCTTTA CGAACAAGCG AAAAGGGCCC TTAACTGAAA

257461 CTGAAAGGGC TTTTCTCTTT ATTCTGACTT AAGAAGAAAG TGTAGGGCGC TATTCGATGA

257521 AGAAAACAGA CTTTAGGAAA GTGGTTCAGG TAGCTCAGCT GGTTAGAGCA AAGGACTGAA

257581 AATCCTTGTG TCAGTGGTTC GAATCCACTT CTAGGCGGGC GAAGGGTCCA AAAAGGATGA

257641 GCGAGTTCGG TTCGAGTCTT GATCGATCGG GTAGATCTAT ATGCTTCGGA GGGTTAAACG

257701 AGGTGTAGCG CAGTCTGGTC AGCGCATCTG TTTTGGGTAC AGAGGGCCAT AGGTTCGAAT

257761 CCTGTCACCT TGATGTGATG GGCTGATGTG CACAGACCCG TAGGCTATAA GGCTGACGAA

257821 AAAAAGCACA TTTTTCATTA ATGGTAAAAG ATGATTAGAC TTATTTCTTG ACTTTCTAGG

257881 GCACTCGGAG ACATAGTCTT CTAAGTTTTT CTTTCTCTTA GGCCTCTTCG CTCCTGTGTC

257941 TATCGATATT ACCCTTAACT TATAACCGAG TCTATCTCAG TCATTCAGCA GCCCTATCTG

258001 TGTTTATTGA TATTAACCTT AACTTCTAAA CTTCGTCTAT CGACTTTATT CAGCTCTACT

258061 AAACTGAGTC TATCAACGCT ACTTCAGTCT TTTCACCTGG CTCGATGCGC TTAATGAAAG

258121 GGAAATCCCT AGATTAAGAA AGAATTTCCT TTGTTTGTAA TTAAGCAGCA TCCTTTAAGT

258181 GAGTTGGGGG GCGGCTTTGT TTGTATAGTA GGGGTGCGCC GGACCGCCGA CGAAGAATAG

258241 GTACCCGCAC CCCAGGCAGA GTTAGTGAGC CGTGTAATAG GCGACCATTT CGCGCGGTTC

258301 GGGGGGCACT TGAGTCAGCC GCCGGCGCCC GACTGCGTCT TGACCCCTAT CCAATTTTTG

258361 GGCCAATTCC CTCTTCGTAC TACCAAAAAA TGAGATTCTT GCCGAATCCG AGTTTGCTGC

258421 TCCAACCATT ACCAAACTAA TACCTATTCT GTTTAGTACT TCAGGTGCTT CTGTTGCGTA

258481 TAATGTAAAT CCCGTAGCGG ATCAATTCCA ACGAGCCTTT CAAACTAGTA CTTTTTGTAA

258541 TCGACTCTAT AGCTTCTTCA ATAAACGCTG GTTCTTCGAT CAAGTTTTTA ATGACTTTCT

258601 AGTCAGATCG TTCTTGCGTT TCGGGTATGA AGTCTCATTC GAAGCTTTAG ACAAAGGTGC

258661 TATTGAGATA TTGGGCCCCT ATGGTATCTC GTACACATTC CGACGATTGG CCGAGCGAAT

258721 AAGTCAACTT CAAAGTGGAT TTGTTGTGCG AAGAGTGCGT TATGCCCCGT GGCCGCCTGC

258781 CCGGTGGGGG CGGCTCCTCC GTTGTGGGTA AACGGGAAAC CCGACTCTAC GAACCCGAGG

258841 AAAGGCTGCA AAGCAGTAGT AGGGGCGTTA AGACCGGAGC TTTTTGTAGT GCTAGCAAGA

258901 ATGCAAGTGA ATCAATTTCA TTCCCTAGCG AGTGAAGTGC TTACGCCCCG GAGAGAGGGG

258961 CCAGCAAAAG AACTCGTTCT TCCCCTTAGC ATATACTATA CGTCGGTCTT CACTTCACAC

259021 CATTTTGAGA TCTTTCAATT CGTAAGATCA TGATAGAGTC CCCTTTACTA ATAGAATCTC

259081 AAGGTTAGGG GGCTGACTAC TTCGCGAGCC TTCTGTGCCC TTTTTTTTTT CTAACTTCCC

259141 TTTTTTCTTC CGTCCACGAG GTTCTGAAAG AAAGAAAGGG GCGGCTATCT GGCGGGAGTC

259201 GTTTCGGTTG TATGCCACGA GGTCCCTATG GACAAGGGGA CAAGTGAATT CTCGCTTTTG

259261 AGCGCAGGCA GCCTTCTACC ATCCATCCCA TTGCATTCTA TCGTCTCGTA TTGTACTGTA

259321 CCGTATCAGA CCAGATAGAT CTATTGAGTG AGAGAAAGGT AGTGTAACTA ATTCTATATT

259381 CTTTCTTTTT CTATTGATAG GGATCCCCAT TCATTCCGTC ATTCCCGTCA CTACGGATTG

259441 ATTGTCCCTA CCTAACTACA TGGTAGTGGT CTAGAGAGCG CAATTGCTAG AGCACGGGAG

259501 AATGAAGAGT AATGATTTCA GCAAGAGCAG CCGGACGGAC TACTATAGTG AGTCTAGTGA

259561 CTACTAGAGT AGAGTTAAGT CAAAAGGTAT AGTATAGCAG CCTTTCCGAG CGAGCCTCTG

259621 GGATCTCCTG TAAACCCCCA TGATGTGGTA AAGGGAGGAT ATTAGGGGAA GCAGTGAGTG

259681 GAGATTCTCC TGCAGAGAGC CGGATGAGGG GAGACCTTCA CGTCCGGTTC GGAGGGCGGG

259741 GATATCCCGA CCCTACTATC ATTATGCCTT TGCAATGTTA CTTGGTTCAA CTCTATTTGT

259801 GACCTTTTCT CGTATGTGGG ACTTTCTATC TTCTTGGGTA GATAATCGAT CGTCTTTCAT

259861 TTGGATAGTG AGTAGTTTTT ATAATAAGTC AAGTCAAGAA TAATAATCGA ACTGGAGGAG

259921 CTTGCCGGGA TGGCTTGGTA AGCAAGCAAC CAGGCGCCAA CTCCCAGTTC TTTCTCTTCT

259981 TTCTTTTTTT TGTGTACTGT ACAACAACCT TAACCGCACA AGCCTGGGCT GGGCCTACTT

260041 CCATCCCCAG AGGAGCCGTA TGAGGCGGAA GCTCCACGTA CGGTTTTGAA GCCGAGCCTT

260101 TCCAGCAATG GGGCTTAGGG ACCGATATGA TGATTGGTTT AGGTAGGGCG GCCGGCCTAC

260161 TACGGGCACC TGTAGGGATT AGTGTGTGAG ACCGCGATCC ACAAACTAAG GCATGGGACT

260221 CACCCTTTAC TTGGGAATGA AAAAGGGAAA CATAGCATGT CACAAGAGCG AGGCGAGCAA

260281 GAAGCACCTA CTGTGAGAGG GGCGCCTCGC GAGCCGGGCT TATAGAGATG AGGCCTTTTG

260341 GCGAAGCCAA GTCAATTTCG GGCCACCAAA CCCTGCAACT GATGAGAAGG CCCTATAGTA

260401 TAGAGGGAAG CGTGTACGTT GTCACACTCC CCGCCTTCCA AAGGTGCCTA GAGGACGGGC

260461 CAGACGCAGC AGAGCGACGA CCCGGGAGCG GATTCCCCGC GGGGGGACAG GAGACGGCCA

260521 TCTCAAGGCA CATCACGACC TACAGGCAAC ACCGGCGAGA CCTGGGAAGG GAACCCGATT

260581 GGGAGTCAGA GGATCCATAG TACCTGCTGC CTTCCAGACT TCATATTCAT CATTTTTGAA

260641 AGCGGGGGGA AGGGATCTCT TTTCTGCAAC GGAAAAAGAG GAGCTGATTT GACTCGTCAC

260701 AAACTAACGA TACATCCAAT ACCTATGATC TGTGCTTAGA AAGCGAACTA GATTGGTAAT

260761 AACTAACTGA ATAAAATGGA ATCGAGCGAC ACTCCACTTT CCTTGCTACC CACGAGACAA

260821 CATTGAGGAT AACAACAGCA CGATCCGCCC GCAAGGCTGA CTCATTCGGG CTTCATAAAC

260881 CCAACCTGAT TATGAAACCG CAAAAAGGTT CACTTCCACC ACATTAAAAA AGGCACCGGT

260941 TTGGGTGGCA ATTTTTCGCT TCCAATCCGG AATCTCGTAG ATTAAGCTCT TCTTTCATTC

261001 CTATTGTTCA AATGCTTTCC CTTGGCTTCG GTGCCTGCTA GGACTGGTAG CATGGTCTTC

261061 TCTTAGAGTT TCTCTTTGAT TCGGAATGGG AGCTGCACGT TAGCACTTGA CTTTTTTACT

261121 TTTCTGGCAT ATCAGGTCTT TTCTCTTTCC CGGGTATAGG GATAGGTATA AGCTAATATA

261181 TAAAAAGCTC CCCCTTTGTT TTCTCATTCC TGCGATTCAT ATTGATTGAC TATCCGGCCA

261241 GAGATCAAAG TCTTTTAGCC ATGGATGATA CGATTACCTT TCTTGCTCGA CTCGAGAGGA

261301 TCAAAGAGAA GACAGCGCCA TGTTAATGCG ATCACAACAT GAACAAGCAA AAAAAAGGGT

261361 CTTTTTTCAC TTTTATCATA TTTTGCCGGG ACTAGTCAAA TGAAAGTGGA GATTGAACGC

261421 TAGAAGGCGC AGATAGGAAC TGCGAGCACG GATTCTAATC AGAAGGCGAG CGAGTTGTGT

261481 TAAAGCGGTT TTGTAGTGGG AAATGCTCCA AGGAAAGAGA TTTGAAGACG TAGCGCAGTC

261541 TGTAATGAGA GCGGGATGGG GACGGAAAGG ATTCCCCCTC TCCTGTAGTA GCGAACCGGT

261601 CCATTTTTGA ATTTAAGAAA CCGTAGGCCC AACGACAAGT CCTCAGCAAA CAGAAAGCTA

261661 ATGTCGGAAT AGCAGCTGTT AGAAATCGAT CTAGATGCCA GGAATCAGAC AAGGAACTAA

261721 ACTTACACTT GACTGAAAGC CGGGATTCAT CTCGAGAAAT TCCTTTTGAA TCGACAGATG

261781 AGATGAGAGG GAATTCGCAC ATTCAACTGA AGGAGATTTC CCACTCACTT CTCGAAACCT

261841 CATGTTCTCT TTCATGCAAA AGGTTCGTAA TATCTATTGT CTTCAGAGTC AGAGAAGTGG

261901 ACAAATGCAG CTAGTCTTTT CGACGAATCA CTTGTTGGAG GAATAAGCGC TGTAGGGACT

261961 AATCCGTATA GTTGAAAGGA TGCTATAGAC TGAAGCTGCA CATGAGCAAC TTTTGAATCA

262021 AAGCGCTTTT CCCTTGGTTC TATTAGTTCA AACTTGGGCT ATGTAAAAGC TCCCCAGGTT

262081 AACTTAGTTA AAGTTAAAGC GGAATCAAAT ACCTCTTTTC TTTCACTTGC CTTCAAGCAG

262141 GAATGAGAGC AGCAAAGGTG TAAGTAGCAA AGGTTTTGTC TTAGCTCTAG ATTTCTAAGC

262201 GGTTATATAA TTTTTATTCA GTATATATAA TAAAACGTGT GTGCCTTAGA TCAAGTGGCG

262261 GGCTTTCTTT AGCAGGCTCT TGAACCTCTT GTCGTCTGAA TGGCGCCCTT CGGCATGAAC

262321 TATCTATATA TATAGAATTC CGGCTGATCT TTCTTCCCCG GTAAAGTCAT CAATCGCAAC

262381 CTGACCCAGA AATAAATAAG AAGATGTTGG CTTAGGAGTT TGAGTCGTCT TCTCAATCGG

262441 CATAACCCAG TTAATATAAA GAATGGGTTT ACTGTAGTTC TTCTTTAGTC ATTCCCTAAC

262501 CTTTTATTCA TCTTAGCGTA AGCAACCGTT GAATAAGATT ATCTAAATCA GATGCTTTCC

262561 AAGAACCTAA GGCTAATAGC TCCCGTGCTG CTTTCTACTC CTACTCAATG AATCCGAAGC

262621 TGTGGTATGG GATGGGTGTC CCGTGGTGCG CAAATGAAAC CATTTTCTTG TCTTAGCCGC

262681 GAGCAATTCC ATTTGTCCTG CAGAGGGACT TTGGAATGGA ATGTGAATGC GACGCACGCA

262741 GAGATGTGGC AGAACTTTGG ATCGAAAATG AAGAAAAGAT AAGCGAGGAT GAAAGTCAAA

262801 GTTGTATTGA AAAGTATCGG TTACAATTAG CGAACTGTGT AGAGGTAGAA ACCTGGACTG

262861 AGGATCAATG ATGACTGAGA GAGGCAGAGG AGCAACGAAG ACTTATAAAG AGCCAAAGGG

262921 TGGTTGAGAA TGAGGCCTAC TAGGATAGGA AAGTGAGCTA GGCCCCGAAA GAAAATGCTC

262981 AAAGGTGGGG TTAAATACAG TCTTGCTACT TGGGAAATAA TTACTACTGA ACCGCTTATC

263041 ATAGAAAAGC AAAGAAGGGA TTGACTGAGA GACCGGAAAA AGAAGGAGAA GCAAACTACC

263101 CTTCGGTGTA TAGCTGTTGT GGCGAATCGG TTGTTGCTGT TTTTGACAAT GGTAATGGTC

263161 CCAGCGAGCG ATTGGAGCGG ACCGGATGTA ACAAGGGGGT TCGCTCGAGA GACCTGAGAC

263221 GCGCCTCTTA TTTCCTTCTA TTAATCCCTC TCTTTCACAA AGAGGACAAG GAAGTTCAGC

263281 AATGAAGCAA GGCAGTTTGG CTGTTTGATT CTTGCTCTTG AGCGGTTAAT GGAAGGGAAC

263341 GGGTGGTTGA TGGCAGGGAA TGGGCAAGGC CCTAAAGCTA AGGGCCAGAT TCCTTCTAAT

263401 GAGTCTCCTT GTCTTTGTAA CCAGCATGAA TGAAGGAAGT CAGAAACGAG AGAGAGGTCC

263461 GATCAAGCTG TCTCTCTTGC TTTTGAGCTA ATGGCAGGAA GAAGCGGAGA AGATCCCATG

263521 TTGGAGGGAC TACTAGCCTT CTAACAAGAC CATCTCTCTA TTACCTGTCG TAGCTGACTT

263581 TAGAACTAGG AAGCTAGGAG AAACTGCAGC TAACCCCTTT AACTATTTCA TAACCTGCGG

263641 GCTCTAGGAA GCAAGGTAGA GATAGATGTT CTTAGTTGCT ATAAGTAGTT CTTCCTCTGG

263701 CTCTTCTGCT TGCCAGTCGG ATTATTCCCC TCCTTTTTCA ATTCCTTTTG GAATAGATGT

263761 TCTTTTGGCT TTCTTCTTCC AAATCTCTAG AGGCAGGCAT GGGTAAAATA GAAGAAACAA

263821 CTCAAGCTAG AAGCCGACCG TGATTCAATA ACCTACCAAT CTGGGCTATC AGCAGAAGAT

263881 TCCTACTAAT TATAAGTGGG TGTTCCTCGA AGCTTAGACG AGTTGAATGG AAGACAAACT

263941 GTCACACCAT TCTGAGGAAG TTTACTGGTT CGACTTTGAA AAGAGAGAAG CTGATGTAGA

264001 GGACCTGAGG GGTGCCTAAG AATCCTGCCT GAGAAAACAA GAGTTTGAGG CCTAAAAGTA

264061 TGAAAATGAG TTTATATAGG CAGACATTAG CCTCTGAGCG AATCTACCCC TTCTTAGGTG

264121 TTTTAGCACT CCGATCGTCT GACAAACAGG GGGATTGAAG CCTAAACAAC AAGATCCGAG

264181 CGGGTTGCCC ATCAGTTCAT TCAGTTTGGA TTTCCTCAAA CATAGGCACT ATAGGCAGCT

264241 ACCCGAGAGA TCCATCTTCA TGCAAGGAAT GTGGAAAATA GCCTGGCAAA GGCATCTTCT

264301 ATAGATGGAC CGAAACTAAA CTACTAACGC TTTCTTCAAG TAGTAGAAAT GTTATGAATG

264361 AACACGAGAA GAGGGGAATT GCAGGATTAA TAGTTTCGAT ATTACAAAAG CGACAGGTGA

264421 CCTACCAAAG CATTAACGAT GGGTTCTCAA CTTTCAGATG GAGGGGGTAC GATACATTTT

264481 CAGTGTACCT TGACGCTGTA AATGCTAACA TAGAAGCAAT GAATTTATCG ATCTGCTTAG

264541 GGTTTCAAAT ATGGTACTAT CTAATGCCAG TCCTTATGCA GTCTGTAGGG TATTAAAATT

264601 AGAATGAAAT CCTAAACCCT GAGGTGGTAA ATTACATCAA GGACAGATCA AGAGACTGGT

264661 CTGCCCCGAT GATCCAGCGC TCCATAGATC TATGCGATCA TATGTATAAT ATGATTCAGG

264721 CGGGCACGCT CGAAAGAGGT GGTGCCAGCT CCTCGGTGTT AGGGACCATC GCTGAGTCGA

264781 ACGAGACGGG TACCTTCGAT CCCTTGTTGG AAATAAAATA AGAAGAGGTG AGGAAACCAA

264841 CGTGGAATAC CACAAGAAAG TAATACTTAC TAAAGTGGTG ATTGCCTGCA TCACTGTTTG

264901 TATATTAAAC AGTTTATTCG TTACTAACGC CTGCGGAACA GATCTATATC AACTATATAT

264961 TGATGGAATG AGTTCAGAAT AAAAAGAAGA AAAGGGTATA TGATATAAAC TACTGGATAG

265021 ATTGCGTCTT ATTATAAAGT CTGTTATCAT ACAAGTGCAT ATCCTTCCTC AAGCTAAGCT

265081 TGGTGGATGT AATGCTTCTT GCTCGCTTGA TAGCAGGGAT TCGATACCTA GCCCATCTAG

265141 AGATGAATGT GCTGCTGACT CTATTACTGT GGATTCAGAT GCTCCCAGTC TAGAAAACTT

265201 CCTAGCGTTC GTTCCCTTAC TTCAGGTTTT GCTGTCTTGC CCGCTACGAC TGGCTTGCTT

265261 GAATGGAATG AGACTGAAAA GGCCAAGGAA AGACTATTCA TATAAAAGAA TAGGAAAGCA

265321 AATTCTTAGC ATGAAGAAAG ATTGGATTCT TAGTCTAATC TATCAAACTT AAGGAATCTA

265381 TCAACTCCTT AATCTTGCCT GCGTCTATCA ACGCTACTCT TCGCTCCTGT GTCTATCAAC

265441 CCAGCTCTTC GCCCCAGCAT AATGAGTAGT ATGTAGCTGC TTGACCCCAG CCTTAACCTC

265501 CTTCAACTTA GACCATACTT GAAACATCTT ACAACCACCC ACTGGTTTAT TCCAACAGCT

265561 AGTCAAGATG TCCTGGAACT GAGCATGATC AGCAATCACA TTAAGAAAGA GAAAGGGTCT

265621 ACCACCACCC AATGACGCAT CAAAGCACTC AAATAAAAGA GGGCTATGAT CTGAGATGCC

265681 AGGGGGGGAG AAAAAGGTAC TCCACATTAG GATATTTCTG CATCCAGCAT TGATTCACAA

265741 TGCCTCTATC AATCCTACTG GCAATTCTGC TAGTTCCAGA CCCCTTATTG GACCAAGAGA

265801 AAAATGGACC TTTACTCTTG ATCTCTGTCA AACCAACATC CACCAAAAAA TCACTGAAAT

265861 CCCTAGTCTC AAAGTGAGCC ACAGGCTCTC CATTAATCCT ATCCTCACAA GAGAGAATAG

265921 CATGAAAATC CCCAGCAATA AGCCAAGGAA TTGCCTGAAT ATTTATCCCT TGCAGAGATC

265981 TCCATAAAAC CTTCCTTTCC TCCACAGTGT TCAAACCATA TACCACAGTA CAGGCCAAAG

266041 AGTGTTTCAA GTCTTTGGAA TGGACAAGAC AATGAATGAA CTGTTCCTGA ACCTGCACTA

266101 TATCAACAGA GAGAACATCA GCATTCCACC CTAGCCAAAT CCTCCCTTTA TGAGAGAAAG

266161 AATAGTTGCA CTGCCAAAGC CAAGCAGACC CAAACTTCCT TTGAATACCA AGAACTTTAT

266221 GTTCTTTAAC TTGAGTCTCT AATATACCTA TAATATTCAC ATTATGGCTT TTCAGCAGCT

266281 TCTTAACTAC TGAAACCTTG TGAGGGTCAT TGAACCCTCT AATATTCCAA GTTACCAGAA

266341 TCATTGAGAA GGGTTGGGAT GATCCTGCTC CTTTCCATCC CCATCATCTT CAGGAATCTG

266401 AGGCTCCTCC TCAATCAACA CCATGTAGGA GTTAGAACTG CCAATCGCAG GCCTAACCAA

266461 TCTCCTTCCC TTACTCTTTA TTTTCCTAGC AACCACCCGC CATTCACCAT CCTCACTGGA

266521 GTTGTGCTGA GTCTGTGGGA TGGGGGTAGT AACAGGAACC ACAGCAAGAG GTTGCCCTGC

266581 AGTCACAATC TCAGGCCCCC CACCTGCATT AGAAGCAGCA GTAGGAACAG CTTCAGTTAC

266641 CACTGGTTCA GCATCAGCCT CCTTAGATTT AGGAACCCAT TTCTTGGAGA CTTTCTTCTT

266701 CTCTGGAGCT TTCTTTGCAC AATCATGCCC CACTTTATTA CAAGTAGAGC AAAAAGGAGG

266761 GCGCCACTCA TAAATCACAT TTTGCTCCAT GACTTCCCCA TCAGGACCTT CCACAGAGAT

266821 GCTAGTAGGC AAAGGCTTGG TCACATCAAT TTCTACCAAG AGCCTAGCAA AAGAAACCCT

266881 GACTAGAAGT GCACTCATCA GCACACACAG GCACTCCTAG TAAGCTTCCC AACCTACTTA

266941 AAGAGTCAGG GCTCCAACAG TTAAGAGGCA GATTAGGAAA CTTCACCCAC AATGGCACAG

267001 TTCTTAAAAC CTCATCATGA AAATGAAAGC TAGAAGACCA AGGTTTAACA ATAGAAGGCT

267061 TCCCAAAGAA CATATGAGGC CCTGAATACA ACACAGAATG CATATCTGCA GCAGATTGAA

267121 ACTTAACAAC AAAGTACCCA TCATCATGTA AAAAAGCTGA AGGTTTAGAA ACCTGATTCC

267181 ATTGTTGGCT AATGAATCTG TAAACAGCAG CTAAAGTAGG CTTATAACCC ACCAAGAATT

267241 GCATTAGACC ACTTCTCATT ACCTTTCTCA AGCTCTGCAG ATTGTAACTG TGCCACAGAT

267301 TGACCTTCCG GGGCAACAAA TTGGAGAGAA ACCCCTTAGC ATTCATCTTC CCCTTGAAGA

267361 GTTCAGTCCA ATCAGAAGAA GCATCCTCAG TTGGCTTCCC TGCATCAGCA GAAGAAGCTT

267421 GTTTGGTAGC AGCATACCCA CCACCAGATT AAGTAACAGG GGGATCTCGA GTTACTGTTC

267481 CATTGGTGTT CTCCCTGAGG TTACCAAAAG ACAGCCTATT AAAGCTAGCA ATAATCTCTG

267541 CATCAGTCCG CCCCAACCGA TGGATGAACA ATGGAGGGCC CAGGTGTTAC CAATTCTTCA

267601 TCTTCAACAA TGGTGCTAGG GTTTGAAACT GCACCAGTGT TCTTCGAATT TTGCAAAGTA

267661 TTGTTAACAA GGGTTTCATT TGAGCTGGTA AGAGTCTGGG GAAGAGGTGT TGAGGCCTTC

267721 TTTTTCTTTG CCATGGCAGA ATCGAAGGAG CTGAAGGAAA CCGAGCTACT CAGAAATCGC

267781 CATAGTCGAG AGAAAGTAAA CGCTTCTTCA CTTTTATCTT CTTCTCTTTC TTGTTGCATA

267841 ACTCTGACAT AGGTTGAAAT TTCAGCATTG TTTTCAGTCA GAGGAGGAGC TGCTCTCATG

267901 GAGTCAATCT CATCCCACAA AGACTTAATC TTGGTGTAAT ATTCAGTAAC AGTTTTCTCC

267961 TTCTGCCTGA GATCATACAC AGCCTTGTTA AGTTTCTACT TTCTTGTTCC ATTTGTGAGT

268021 GCAAACCTTT TCTCAAGTTG ATCCCAAATC TCCCTTGCAT TCCTCACATA CACAACAGAT

268081 TCCTTCACAC TTGGTGTCAT GGAACCAGTT AACCATGCTA TCACCATGTT ATTGCAAGTA

268141 TCCCACTGAT CTTGCTTTTC TTCATCTTCA GGATCTCTCT TCACCAAGCC TGTTACAAAG

268201 CCAAGCTTTC GCTTTGAAGC TAAGACTATC TCCGTGTCTC TCTTCCATGT TCTGTAATTT

268261 GAAGGGCCAC TCAGCTTTTC AGGTATGGTT CCAGTATGAG GACCATCTGA AGGATGCAAG

268321 TAGAGAGAGA GGGTTCATCA TATCTGCCAT GGTGATGCTT CCACCTTTTG TAGGCATTGG

268381 AATGTATGTG ATTTTAAGGT TGATCAAAAA AAGATTCCAT TTTTGAGGTC AACGCAACCT

268441 GGCTCTGATA CCATGAAGAG TATCAACCAG TGAATGAAGG AGAAAATAGA GAGAAGAAGA

268501 ATGTTGGCGG CTCAAAAGTG ATATTTCATT GATACATTGT GTCTATTTAT ATACATGAGC

268561 AACAGTAGTA ATTCCTAGAG AATTCTGGCT AATTACATGG GATTCCTGAA GTATACACCT

268621 AAGACACCAA AGAACGAGAA TAAGTAGGTG AAGACCATAC CAAACTTATA AGAAAAGTAA

268681 ACACTTACAA TCATTCTAAT GGAAAAGTCA ATTATAAGTC TTTTTCCATT TTTCAAATTG

268741 AATGTGTAGA TACGTACGAA AAATACAAAG CAAAAAAGAA CTATGCCCAT TATCACAAGA

268801 TTCATACCTG TGATTATTAT AGTCTTTTCT TCAGCTTCAT TCTTTCTGCG TTAATTTAGC

268861 GCTTGCTGCT TAGGGCGAGA GCGGCCCTCT CCTTCTACTC TACTGCTGTG AGTGCTTACT

268921 ATCTTCCGAA TCTTGCTGCC CTTCTGCTGC CGCGTATGGT GCTGGTAGGC CATCATATGT

268981 GTGCGGTGCG GCTCTAGTCT GGGAACTTAT GCCGGCTTAG TAAGTCTGAA GCAGCCCTCA

269041 GCTCTTGTTT AGATGTGATG AGCTATCTGG GCATTCTATC TAATCTCGTA GTGGATAGGC

269101 GCTTCTCGAA ATAGTCTTGC TTGCGGTTCG TGACCTAGGC GACCACGGAT TTGAATATAG

269161 CTGTGAAAGG TATGCCCAAT ACCTAAGGTA TCTTTTTCCG GTTTCCAAGA GGTGTCAAAC

269221 CAGAAAGAAA GATACAGGTC ATCCCTTAAG AAATATCTTA AAGGCACAAA ACCAAAACAA

269281 GTGAGAAAGC CGGGGTTCAA GATAGCACGG TTCCAGCTTT CCCGCTTTCT TTCTTTGATC

269341 CGGTGGCAGC TGCCGGGGGA CTAGTAACTA GCCTGTGGTC CCTCTCTCTT GCTTCTTCTC

269401 TCTAACGGCT GTCGGTCTGC GCGGTCTTGA CTAGTGGTTC TATCTCCTTC CTTCTTTTGT

269461 TCTGGTTCCC GCGCGTGTAG GAGGTCTCTT TTGAGCGTTG GGTTTGTTAT CAAGGCAAGG

269521 AGACTGTGCT TTTGCGCTCT TTTTACGGCT CGTTATGCTT TTTCCGGCCG TAGTGCGGTA

269581 GCTTGCTTGC CCGATTTCCT CCTCATGGCT TTGTCAGAGC TTTTTCTCGT TCCCCGACGT

269641 CTATACGTCG ATCTTCGAAT CGCCACTAAC TATAGTATAT ATTAAGCTCT TCAATTGGTC

269701 GGATGGCTCT TTCTGTCCTT CTATCCTGGA TGAGTATGAT CAAAGAACTT CAGACGTCCT

269761 TACGTAGATG GTACGAAGGC CTAAGGAGGA GCGGATGGAC GTTAGTTCAG CTCGACCATA

269821 GGGAACGAGT TACATACTTG GAGGTTTGGA TGAGAATTGA ACAGGAGATA AGGGAAAGCC

269881 TAACGTACCT ACCTAATGGC GTGAACTATA ATATGCCATT AGCTGAAACC CCGCTATCGT

269941 GCTACTTTTT ACCGGGTATA GAAGAAGAAG GCTCGATGAA CATTGACCTC TGTTTCGAAC

270001 CGACGCATAT ACGAAAGTCT AACTACCGCT TTCAACTTGT CCTGTCTTTG CTTTGGTTCG

270061 CAGATCTTAG TATAGTATAT GCTAAGGATA AGTATTGCGC TTAAGTCAGT TAACAAGATG

270121 AGAGTCGGAA AATGGAAATA AGAACTGTCA AGTGATTCTT GAATGCTTCT ACTTATGTAG

270181 ATGGAGTCCA GTACGCTACT ATATATTAGG AATGGTATGA GGAATTCAAA GAATTCTGCT

270241 AACTAAGCGC AAGGGAGTTG ACTTACTTAG TTAAAGTAAG GAAGAAACAG TACCTGCTGT

270301 TAACAAAACG GAGTCTCAAA AGCCCATTTA TCACACAACT CTCGAGGCGA ATCTATATCT

270361 ATCTATCTAA TAGCGGTCGA TTTGTAGCAT TTGTCATGTA AGATAGTTTC CCTCTTCACA

270421 ACTTTTCATA CTAGGGAGAA TTGGTGAGAG AATTGAACAC CATTCCTAGG AAAAGGCTAC

270481 GCACCCTTCT TTTAAGGGAA GCTTCTTCCC TGTTCACATG CCATAACACT TTCTCCTATA

270541 CTAATAAAGT GAAAGTAAGG ACAGGCTAGC GCTTTTCTCT GCTTTCAGAG CCTTAGCATA

270601 TACGTCGCTC TTCGAACAGC CGCATAAATA CCTCGCTTTT GTTCAATTAT AAATCCAAAA

270661 TCATTTTGAT GGAGATTTAT AGCATCATTC AAGTAAATAC AGATTAAGAT CGTAAAAACA

270721 TGAGCTTGTA ATATAGCTAC ACCTAATTCA AGACCGGTTA ATGCAAGAAC TATAAATAAA

270781 GGACCAAGAT CTCCTATGAA ATATAAAAGA TCATTCATAC ATAGCATAGT CCAAGCGAAC

270841 CCACTTAAAA TCTTTACTGA ACTATGACCG GCCATCATAT TAGCAAATAA ACGTATTCCT

270901 GAGCTTAATG CGCGAAAACA ATGAGGGATT AGCTCAAGGA GTACTAAAAA AGGTGCTAAC

270961 GGCAGCGGGA CTCCCGCAGG TAATGAGAAG CTTAAAAAAT GAAGCCCATT TCTTTGAAAT

271021 CCCACTATAG TAATGCCAAT AAAAATGGAA AATGAAAGAC CCAAAGTAAT GAGAAAATGA

271081 CTTGTAACTG TAAAGCTATA GGGTATCATA CCCTGGAGAT TACGAAATAA CAAAAAAGTA

271141 AAAGTGACCA AGATGCAAGG GAAAAACTTT TGTTTCACAT TTCCGGAAAG ACCACCTATT

271201 TGTTCGTTTA CCAGGTTCAG CACGAAATCA TAAATAAGCT CTACCAAGGA TTGCCAAACA

271261 TTTGGTACTG AGTTTCCTCC TCCCTTTTTA GTAACAAAAT GAAGCAGAAG TAGGACCAAA

271321 CTGAGAGTTA GCAGCATAAA CAAAGATGGA TTTGTGAATG AGAAATACAA GTTTCCTATT

271381 TTCATAGGAA TCAATGGGAG AATGGAAAAT TGCTCAAGTG GGCTGTTGGG CGTAATCGTA

271441 ATAAACACTT TTCATTTCAT CCCTCTAGTT CCGCTTCTTG CTCAAAAATG AAGAAAGACT

271501 TGTCGGAAAT CACCGGTTGG GTTTTTTCCA ACCAAGAAAG GCATGGGAGT CTTTGGGCAT

271561 TGCTTTCGTC TCTTACGAGA TTTCTATTAT TCGATTCAGC TTGAAAAGAA AGATCAATAC

271621 CAAACTGACC CATATTTCAG CCAAGTCTTA GAGAACTTGA AGGAACTATC CAGCAGCAGA

271681 AAATTCCCCT ACATTTTACA TGATGGTTAT CTTTTCAAAG GCAACCAGCT TTGCATTCCA

271741 GCTGGTTCAC TTCGCGACCA GATCATAAGG GAAAATAAGC TCTATGTGAA AAAGGTGCTT

271801 TGCATAAGGT CTAGTTCCTT GGGCACTGGA TTGGCGACGG CATGAGTTGG TTGGATCAAG

271861 AGAAGGTGGG TGCAAGCCGT GGTGGACTGG GAGACGCCAC GCAAGGTGCA GGAACTACGA

271921 TTCTTCCTCA GATTAGTCAT ACTTAAAAAT ATTTATTTAT ATATAAGTCT ATATAATACT

271981 ATAGGCGGTT CATCGAGGGC TTCTCGGGTG ATCAGAAGGC GTAGCAATTT GAATCACGCC

272041 GCATCGCAAA AAAGTATTAT CTCGGGCAGC GGTTGTTGTA GTCTCGGGTT TCTTGTAGCT

272101 TTGGGGATTG GTAAATGACT TTCTTCCTGC AGGCAGAACC ATTGATCATC TTCATCAAAG

272161 GCTAAGGGCC AAGAGAAGCT CAATCGAAAC GAAGACCTTC GAAAAAAAGA TTGAACCGGG

272221 AAGAAAAGGG GGAAAAAAGT AAAGTCTAAG CATATATGGC ACGAAAAGGA AATCCGATTT

272281 CGGTAAGACT TGATCTGAAT CGCAGTTCAG ATTCAAGTTG GTTTAGTGAT TCTTATTATG

272341 GTAAATTAGT ATATCAAGAT ATCAATCTGA GATCTTATTT TGGTTCGATA CGTCCGCCTA

272401 CGAGACTTAC CTTTGGCTTT CGCCTCGGTA GGTGTATTAT TATACATTTT CAAAAAAGAA

272461 CATTCATTAA TTTCTTTCTT CCTTGTCGAC CACAACGTCG GAAACGACGC AAAAAATCCA

272521 GATCCATAAA GATGAAGGGC CGGTGGTGGG GATTTGGGAA AGTCGGGCCG ATCGAGTGTC

272581 TTTATTCAAG CGAGGGTAAA AAAGAAGAAC GAAACGAGGT GAGAGGCCGA AGGGCCGGGA

272641 AAAGAGTCGA GTCGATCAGG CTCGACGACC AGAAAAAGCA AACCGAAATC AGGGTTTGGC

272701 CAAAAAAGAA GCAACGCTAT GGATACCATG ACCGATCACC ATCGATAAAG AAGAATCTTT

272761 CTAAATCACT TCGGGTCAGC GGGGCCTCCA AGCATCCGAA ATACGCCGCC GAGGTTGTAA

272821 ATAACATAGA AAATGCTTAT TATTCCTACA AAAAGTCTAA GTTATTATTC CCAAAGAAGT

272881 CTAAGTTATT CAAGTTATTA TTATTATTCC CAAAGAAGTC CCGCTACGGC GGCCCGACAG

272941 GTCATCTACC TAAAGGGGCC TTCCCTGCAG TGCGCCCTTC CTTTAATTAT TTGGTCATGC

273001 AATACTTATT GAATACAAAG AACAAAATTC ATTTCGATCC CGTCCTAGTT CTCAATCATT

273061 TCGTGGCACC GGGCGTGGTT GAACCATCCA CGATGAAAAG AGCTAATGCG CAGGGAAGAA

273121 GCTTAGATAA GAGAATACGT TCTCGCATCG CTTTTTTTGT GGAAAGCTCG ACCAGCGAGA

273181 AAAAGTGTTT GGCCGAAGCC AAAAAGAGGT TGACCCACTT CATTCACCAA GCGAATGATC

273241 TTCGCTTCGC GGGAAGAATA AAAACTACCA TCTCGCTCTT TCCTTTCTTC GGTGCTACCT

273301 TTTTATTTCC AAGGGATGGA GATAGAGTTT ATAAGAACAT CTTTTTTCAA GTTGCCCGGA

273361 TACAACTCCT AGGTAAATTA CGGAGAAAAT GTTGGAACCT CATGGGTAAG GAAAAGGTAA

273421 TGAAATTGAT AGAAAAATTC ATAGATCTAG GTGGGATAAG AGAATTGATA AAGGGAATAG

273481 AGATGATGAT AGAGATCATA CTGAAAAACA GACAAATTCC TTACGGGTAT AACTCTTATT

273541 TGAACGAAGT GAAAAAAATG CGATCTTTGT TGTCTAATAG AACAAACACT AATACCGTAA

273601 TTGAATCGGT CAAAATCCAA TCTGTTTATC AAAGTGCTTC TCCGATTGCT CAAGACATAT

273661 CTTTTCAACC GAAAAAGAAA AGAGGATCAT TTCGTTCTAT TTTTAGTAAA ATAGTGAAAA

273721 AGATTCCATC AGTAATGAAA AAGGGGGTAG AGGGGATCCG TATATGTTGT TCAGGTCGAT

273781 TAGAAGGTGC AGAAATTGCT AGAACTGAAT GCGGAAAATA TGGAAAAACA TCTTGTAATG

273841 TATTACACCA GGAAATTGAT TATGCTTCCG CGGAAGTATC TACTCGTTAC GGAATCATAG

273901 GTGTCAAAGT ATGGATTTCT TATAGTCCAA AATAAAAAGG ACGTGCTATA CCCGAAACGT

273961 ACAAAATAGA GTAAATATGG TAAAAACAAA TGTAGTAGAG GTTGCAAAAC TAGCTTATCC

274021 GAGAATAGGG TTAGGGTTTT CTCCGCTTCT CCCGAAATGT GACCCTCCTG TACGACAAAA

274081 CGTTGTAAGC CCGTTTCCCT TCCGGCGTCT ATACGCTATT TGTCTCTTCG ATACTGAGTC

274141 GTAAAACGAC GTTATTCAGC TCTGCCGCTT CTGCGTCTCG TAGAGACGCA GGCTCTTTAG

274201 AGTCAAGCCC GATAGGGCGC AGGGGCGAAC TCAGCTCCAA GTCGATACGC AGGAACATTC

274261 GAACAAGAAA GATGACCCAG AAAGCATTGC TTTTTTCATT TTCAAGGGGT ATGTATTTCT

274321 CCATTGCTTT CCTAAGAATG GCTCTCGTGT TCATAACCCT TTTAGAGGGG GTCCCAGCTT

274381 AGAAGAGTTT GCGGTTAACT GTCGTTTCAT TGGTTCGACC AGAGAATAGA ATAAAGGTTT

274441 AGACTAAGAA TTGGGAGTAA GGGTCCGTTG GTACCGGATT CAAAGGATTC GTACACTATT

274501 CAAATCAACT ATTCAGAGTT CCTAGAGCTC CCTGTCCGTG TAAAGCTTGT TGGGGAAAAC

274561 CCGTTTTGTC GGACTTCATT AACCGCTTTT TCACGACTCG AGGCTAGGAT ATTTGGAGGA

274621 CACTGTCGTC AGGTCTTATT CTGCATGAAC TGCTACCTAT GATGTACTTT CTCTTTTCGG

274681 ATGAAACCTA AACTTCTTAG CTTCAGTCAA GCATAACAGA CACAGGATCA GAACCCTTTC

274741 TGGCTTCCAG TCTTATTAGG AAAGCGCAAA CTCCATTCCA AGACCTTTTG GTCTACATAG

274801 TAGAATACCC CTCCTAAGAG ACTTCGTTCC AACCGTTAGA ATTCTAGCCT TTTCGTAGAA

274861 GCTGAAAGGG GGTGGTATAC GGCCATCTTA AGAGTCCAAA ACTCTAGCTA AATATGAGGG

274921 CCTCTCCCGG GAACATTCCT TTAGCAGCTA AAGAAGCAGA CCCTAGCAAA GAGGGGGAAG

274981 CGGGTCCTAG CAGTTGAAGA AGGGTCGAAG AGGAGAGCCG ATAGGCGAAG GAGAAGCAGA

275041 TCCTAGTAGT TATAAGACGA GTTAGAGAGA CTCCCGCTAA TCCTATCCTA ATTGTGGTGT

275101 CGAGTCCAGA TGGAACTCCT AATCGGTGTC CGTTAGATGA AGAATGGCTG GAGACTCCTG

275161 CGCCTATCGG CTTGTCTCTT CGAGCCTACT ACTCCTGATG AGTGCCGAGA AAGGAAGCAG

275221 GCTAAGAATA AGTATCAAGA AAGGAAACAG ATCCTAGCAG CAGGTTAGAG AACCTTAATC

275281 AGTGTCGAGA AGGGATGGAG ACCTACTCCT AATAAGTCTC TTGAGTCCCG CCCGATATAA

275341 TAGACCGGGA ATTCGGGGTT AGAGAAAGAA TGGAAGGAAC CCCTAGCAAG TCACGAGAGT

275401 GGGCATAGAC TAAATAAGAA CAAGTATCAA GAATGGATGG AACTCCCAAT AAGTCCGGTC

275461 GGTGCCGTTA GATAAAGGAT GTAGAATCCC AATCAGTGTT TTGTCGCTAG ATAAAGAAAG

275521 GCTCGGTAGA GACAAGCCAT TAGGCGAAGG TGCGAAGCAG CAAGTCTAGA ATAGACGCAC

275581 GGACGAAGGC TCAAGCCGTA AGGCGCAGGT TCGGAGACTG GGCCGTTAGG CCGCGGGCGT

275641 ACCTCAACTC CAACATTAGT ATGATATTGT CCAATTTGTT TTTGCTAATT ACTTCAATTA

275701 TCAACCATTT GCTCTAACAA ATTGGTATCA AGAGCCAAGG TTAGATCTTT GGGTTGAATT

275761 AGGGCTTGTT TTGGTTGATT GAAGATTGAA GTTGTGGAAG GTGTTTGAGC CATGGGAGGT

275821 TCCAAATTGG AAATTGAGAA GTTTGATAGG TCTATCAACT TTGGATTATG GAACTTGAAG

275881 ATGAATGCCA TTTTGGTTCA AAATGGCTTG GATGAGGCAA TGCTTGGGAT TAAGAAGAAA

275941 CCTTCGGATA TGTTGGAGGG GGATTTTCAA AAGTTGGAAA GACTCACCTT AATTCAATTG

276001 AGTCTTTCTA ATGAGGTGTT GAGGGGGGTT GCGAAGGAAA CAACGGCGGC GGGGTTATGG

276061 TTGAAGCTCG AGTCGCTCTA CATGAAAAAA TCGGTGACCA ATCGACTTTT GTTGAAGAGC

276121 AAACTACATG ACCTCAAACT TGAAGAAGGT AAATCCTTGA AATTTCATCT TGATGAGTTT

276181 GATTCTATAG TTATGGATTT GCATAATATA GATGTTACTT TAGATGATGA GGATTTAGCT

276241 ATACGATTGT TGTGTTCATT GCCTCCCGAT TATAAGCATT TTAGAGAGAC GGTTTTGTAT

276301 GGTAGAGATG AATTGTCACT TGAGGATGTT AGGAGTGCGT TGTTGCAAAG GGAGTTAATT

276361 GAGAATCAAT TAACTAGAAA TGATGACCTT GTGCATGGTG GTGAAGGTCT TGTTGCGAGG

276421 GGTAGACCAA AGGAGAGGAA CAATTCAGGT GTTAGAACCG ATACTTCTAA GTCTAGGTCC

276481 AAATCTAGAT TTAAGAATGA ATGTTGTTTG TCATGCTTGC CGAAAGAAGG GCCACATTCG

276541 GAAGTTTTGC CCGGAGAAGG GGAAAAAGAA CAAGGGTAAG GGTGTTGCTA GTACATCTCA

276601 CCAAGACGAT TCGGCGGCGG TGGCTCATAG TGATAGTGAT GATTCAATTC TTCTTGCGGT

276661 TGAATCGAAC TCAAGGTGAA AAATGGATCC TTTCTTCGGG GTGTTCTTAT CATATCACTC

276721 CCAATCGACA TTGCTTCTCC ACTTATGATA GTGTTCAAGG TGGAGTGGTG CTAATGGGCA

276781 ATAGTGCGGC TTGTAAGGTT GCGGGAATTG GGACGGTGAG GATCAAGATG TTTGATGGAA

276841 TGGTCCGCAC TCTATCAAAT GTGCGTCATG TTCCGGATAT GACTAAGAAT TTGATCTCAT

276901 TGGGTACCTT GGATAGCAAT GGTTGTCGGT GCACTCTTGA AAGGGGTGAA CTTAGAGTTG

276961 CTTTGGGTGC TCAAGTGGTG ATGAAGGGCA AGAAGGTTGG CTCACTCTAT GAGTTAATCG

277021 GGTCGACGGT TGAGGGTTCG GCATCGGCGG TGTCTTCGTC AATGTCCGAG TCCGATAATA

277081 CGAAGTTGTG GCATATGAGG CTTGGGCACA TGAGTGAGAG AGGTTTGTCG GAATTGTCCA

277141 AGAGGGGTCT ATTGGGTAAT CAAGCTACGG GTTCTTTGGA ATTTTGTGAG CATTGTGTGT

277201 TCGGGAAACA AAGAAGGGTT AGCTTTAAGG CGGCCACACA TAGAACAAAG GGTACACTTG

277261 ATTACATTCA CTCGGATTTG TGGGGTCCAT CTAGGAAGCC ATCCTTGGAG GGTCACCGTT

277321 ACTTGCTCAC CATAATTGAT TCTTATTAAA GGAAGGAAGG TGTGGGTTTT CTTCTTGATA

277381 AAGATGAGGT CTTTGAGGAG TTCAAAGATT GGAAAACTAT GATTGAGAAG CAAACCGGAA

277441 GGCAAGTAAA GAGGTTGCGA ACGGATAATG GTCTTGAGTT CGTGGAGAAA GAATTCACCA

277501 AGTTTTGCAA GAAACTTGGG ATTGTTCGTC ATCGCACTTG TGTTGGTCGA CCACAACAAA

277561 ATGGAGTGGC GGAGAGGATG AATAGGACTT TGCTTGAGAA GGCTCGTTGT ATGTTTGTTG

277621 TTCCAAGCGG GATTAAGCAA GAGGTTTTGG GTCGAAGCGG TGAAAATGGC GGCTCATGTG

277681 GCAAACCGGT CACCACATAC CGCTCTTGGG TTGAAGACGG CGGATTCTTC CGGATTGAGG

277741 GTCTTCGGTT GCCCGGCTTA TGCTTATGTG AACGACGGGA AGTTGGAGCC AAGAGCAAAG

277801 AAGTGTATCT TCTTAGGATA CACGGATGGG GTCAAGGGTT ATAGACTTTG GGACCCTAGC

277861 ACATCAAGAA GAATCAATAG CCGAGATGTC ACTTTCAATG AGTCCGTGTT TCTCCATAAG

277921 GAGGAAACTT CTTCTTTTGA GCTTGCCGAG AAGGAGGTGG AGGATGGTGA GACACATAAG

277981 AAAGATGAAG ATGTTCTTGA TGATGATGGT GGTGTTGAAA CACCACAAAG AGGTGGAGAT

278041 GTTCCTTTCA CTTCCTCCCC TAGGAAGGAA CCATCTCCAA GTCTTGCTCA AAGGAGGACT

278101 AGGTTTCCCA TTTACCTAAT CGACTTGGTT ATGAGGAGAT GGCGGCTTAT GCCTTGAATG

278161 TTGCTAATGA TGTGGTTGAT CACGAGCCAT CTATCTTCAC ATACCGAGGC CATGGAGAGT

278221 GTTGATTCCG GGAAATGGCA AGTTGCCATG GAAGAAGAAA TGGAGTCTCT CCACAAAAAT

278281 AAAACATGGG AGCTTGTAGA GAGACCACGG GGTAAGAAGA TTGTTGATTG CAAATGGGTC

278341 TACAAGTACA AAGAGGGGAT TCCGGGAATT GAGGAGCCGA GGTGCAAAGC AAGGGCTGTG

278401 GCACGCGGTT TTAGCCAAGT TCCGGGGGTT GATTACAATG AAATATTCTC ACCGGTGGTA

278461 AGACACACTT CTATTCGTAC TCTACTTGCT CTTGTTGCTA TGCATGATTT GGAGTTGGAG

278521 CAATTGGATG TGAAAACCGC TTTCTTGCAT GGAGAGCTTG AGGAGGAAAT TTACATGCGA

278581 CAACCGGATG GTTTTGTTGT TGAGGGGAAA GAGGACCATG TGTGCTTGTT GAAGAAGTCC

278641 TTGTATGGTT TGAAGCAATC ACCTCGGCAA TGGTATAAAC GGTTTTACCA ATTTATGTTG

278701 GGGCATGGGT TCTCTAGGAG TGACTACGAT AGTTGTGTCT ACATGAAGAA GGTGAGTGAT

278761 GGCTCTTTGG TGTATCTTTT GCTATATGTT GATGATATGC TTGTGGTAGC AAAAGACATG

278821 TTTGAGGTCA AGAAGGTGAA AGAGATGTTG AAAGGGGAAT TTGAAATGAA GGATTTGGGG

278881 CCGGCTAAGA CAATTCTCGG CATGGAGATC ATACGAGATC GCAAGAGACG GTTATCCCAA

278941 GAAAAGTACA TTGAGAAGGT CTTGGAGCGG TTTAATATGT TGGATGCCAA GCCCGTTTCC

279001 GTACCTTTGG CATCTCATTT CAAATTGTCA TCCTTGGATT CTCCAAAATC TAAGGAAGAC

279061 AAGGAGTTCA TGTCATCCAT TCCTTATGCC AATGCGGTTG GGAGCATAAT GTATGCTATG

279121 GTTTGTACTC GGCCGGACAT TGCTCAAGCC GTAAGCGTGG TGAGTAGGTA CATGGCGAAT

279181 CCCGGAAAGG CACATTGGCA AGCGGTCAAG TGGATCCTTA GGTATTTGCG GGGTACCTCT

279241 AGCACTTGTA TAGAGTATGG GCGGAATGGT GATGACTTGA TTGGCTATGT GGATTCCGAT

279301 TATGGTGGAG ACCTTGATGG TCGGAAATCT ACTTCGGGGT ATGTGTTTTG CCTCGGTGGT

279361 TCGGCTATTA GTTGGAGATC GGCATTGCAA GATGTGACGG CATTGTCATC AACGGAAGCC

279421 GAATACATGG CTTTAACGGA GGGGAAATAG TGTTGTAACC GAAGTAGACT ACCGAACGGG

279481 TGTGGGGAAG AATCTCGCCA AAGGTTCCAT TTCTGATTCC TCTCCAACGG TTCACTCAAG

279541 AGATTCGATT CTCTTTTACG CCAGGTGAGA CCGAGAACTC GATTGCGGGT GAAGCCTTAG

279601 TTGTCGCTGG TGGTGGAGGA ACGGCTTTGA GTGGGCCAGT GAACGGCGAA TCTTAGGAGA

279661 TTGAAGATTG AGAAACCTTT CTCGAGCAGG TAGAATTAGC AACCATAAGA ACTTTCTCTT

279721 GTTCTTATGG AAGATCGATT TACCCAGAAG AAGTCGTAGC CTATGCCTTT GTCTTTCGAT

279781 GATCAGACCT AAGCCTAATT CCGATCAAAA AAGGGGAGCA ATTCCCCCAG AAAGGGTAGA

279841 GCCTTAGTGA CCCGCAGGTC ATAAGCTGGT AACCAGTGGA AGAGCAAGAA CGGAAGGCTT

279901 ACGAACTACT GAAGTGAACC TAAAGCACCA GCAAAGGAAA GTGATTCTCA AGTTCTTCCC

279961 GCCGCGAAGA GCATTGCTTC ACCGTAGTAA GAACTCGATT ATTCATCCAA CTAAGACCGA

280021 TTTCACTTAC ACGAAGGAAA TGGGAACTAG GCTTCAAAGG CAGACTGGAC AGGAAGTCGA

280081 GCTAGCTAAC CTTTCGAGAG GAAGGAAATC CAGCAGAAGG GAACCCATGA CCTTCTACCA

280141 TTCGGGCTTA AGCGGGTGGG ACTAGAAAAC TCTTTCGCCT TAGAACAAGC AGTGGGGGTG

280201 CATGTGAGTC TCATCTCTAT CAGAAAGAAG GACTACAAGC ACGGGTTAAG CAATCGCCTA

280261 TGGAACTTTG ATTTGGTCTT CCGTCTCCTC GGATTAAGAG TCGAGTGAGT ATCCCCGTCT

280321 ACTTTGTCTC GCTCCTAGGA TTTGAGGTTA CGGAAGTGGT GGCTATGAAT AGACCTACGC

280381 TTGATAAGCC TAGCGATCTC GGTATAAATA GTGGAAGAAA TCCCTTTCTT TTTAAGCCCT

280441 TTCTGTGCTG TGCTTCATCT TTCCCTTTTT TCGGTGATCC CAGTCCTGCT CTTTTGAATG

280501 AGAATAGACC CTTCGTTAGA CCTTAGAACG AAAGAGGAGC TCATTAGTCC CGAGAAGACG

280561 GTCTCCCTAT AAGGAAGTGT AGCGAACTCG TAATACCGCT CCGTGGGTAC AAACGGAAAG

280621 CGTTAAGCTA TGCCAATTGC AGTTCCTCTG AAGGAAGTCC CTTTCCGGAT AGAACCTTTG

280681 AAAGCAGAGG TGCCGATCTC ATCAAGTAAG TTGTTCAATC AGCTCTACTT CTTCTACTTG

280741 GTCACAGGAT AGGAGATGCA ATCCGATCCA CTTCTTTTTT CATTCAAGAG ATGAGATCAG

280801 CTCGACCTAT TTCAAGAGCT TGTGCGGGTT GTTCGCCTTA GGTTCATCTT TCAAGAATTC

280861 CAAGAGGCCG AGCGCCAAGG CTATAAAGCC GGTTGCGGAT TATGATTGCC CGATGGAAGT

280921 CCGGGTTTTC GCTAGCCCAT TTTCGTTGTC GGCTAGTAGG TTAGGTGTCA GAGATTGGGC

280981 ATGGGGATAG AGCCAGAGTA GTAGGGATGA GGAAAGACCC CAAACGCTAT GCATTAAACC

281041 AATGGGACTA AAGCCCTTAT AGACTCCAAT AGTTCGCCTA GTGGCTTTAG ATACTCCAAG

281101 CCTTGGTCTA GTCCTTGCGA GTCTTATACC ATAGGCTCAG GAGATATACC TATTGATATG

281161 TATTCAACCT ACCCGCTTCT CTTATAGAGC TTACTTGGTC GCCAATCTCC TGCTCTATTG

281221 ACCAGAGATG ACATGACTCC TTACGCATGA ACTCTGTCGA CTAGAGTACC AATAGAAGAC

281281 GACCCTATGC TCTCATTTAT GGGCTTTCAC GACTACTGTC AAGTAGAGGG AGAGGAATGA

281341 ATTCTTCTCA TTATTCCCTT CCCTCGGAGT TCTAGTTAGC AGATGGGATC TGATTCATTA

281401 GAGGAAGGGA TGGTGATGAA CTGATCTCTT CTCTTCTTTC AAATCGCATC TCTCAAGTGA

281461 GAAGAAAAGG CCCCCACGGA GCGGTGGGAA ATCAAGGTAT TCAAGGAAGA AGAAGAAGTA

281521 ATCAAGCAGC AAATCTTTCC TCCTCAGATG AGGCTTAGTT CAGCTAGCCC TAGACAGATC

281581 ACATCTCATT AGAAAGGCAG GCATTTCATT ATCATTAGAA AAGGGCATCC CATTATAAAG

281641 AATTGAATTA GCTAAGTCAG TAAGAATGAC TCTGTTGGCC CCGGCAAAAA TACGTTCTTA

281701 GGTTCTACAT TAGCGCTCAA AGCATTGATT CTAAGCCAGT CCGGTCTATT AGCAAAGAGC

281761 GATTCTTTAA GCGCCCAAAG CATTTTCTTT GGGTTCATCA TGAATGTAAG AATCCAATCT

281821 TTCTTCTGAG CTGTTGAAGG TATGTAGTCG CTTAAGCGAA GCTTACGGGA AAAGGAACCA

281881 ATCAACTCAA TATCCGTCTT CTTGCCCATC GTTAGATCTT CTTTAGTCAA ATCTCGTAAG

281941 AGAAGAAAGA AAGAGACAGG AATACCAGAT AGAGAAGAAA GATAGTACTG ACTGACCCCC

282001 TTCAGAGGTC ATTGACCTCT GTCGTATCGA GGCCCAGGAT CTCATGGAGG CCAAAGCAGC

282061 CATCATTCAA AAAATGGCCT CCTGGGATCC AGGCGGGGAT TGGATGGGCA GCGGGGCCCG

282121 GGCTCTTGAC AACCCCCGGA CCGCTACGGG GGAAGACTCC CTGACGAATC TCTATAAGAT

282181 CCTTGATGAT CTTAATGAGA CGGGGCCACT TTCCGATTCC TTCTCGAAAC TGCAGGATGA

282241 CGTCCGGGTC CGGAGGCTCC CTTAATTCCC TCTATGAATG ATCTTATCTT TTTTTCGGTA

282301 TGCCGCTCCG CCCGCGAGGA GCGAGAAAAC TAATTGGTCT GTGGTGATGT CAGAATTTGC

282361 GCCTATTTGT ATCTATTTAG TGATCAGTCT GCTAGTTTCT TTGATCCCAC TCGGTATTCC

282421 TTTTCCATTT TCTTCTAATA CTTCGACTTA TCCAGAAAAA TTGTCGGCCT ACGAATGTGG

282481 TTTCGATCCT TTCGGTGATG CCAGAAGTCG CTTCGATATA CGATTTTATC TTGTTTCAAT

282541 TTTATTTATT ATCCTTGATC CGGAAGTCAC CTTTTTCTTT CCTTGGGCAG TACCTCTCAA

282601 CAAGATTGAT CCGTTTGGAT TTTGGTCCAT GATGGCCTTT TTATTGATTT TAACGATAGG

282661 ATTTCTCTAT GAATGGAAAA GGGGTGCTTC GGATCGGGAG TAACCACTAG TGATAGGGGA

282721 CAAATAATAC GGGGGAAGGA CAAACAAAGG AAAGAGAAAG AGCGATGCCC ACAATAAATC

282781 AATTGATTCG TCATGGTAGA GAAGAAAAAC GGCGCACGGA CCGTACTCGA GCTTCGGACC

282841 AATGTCCCCA GAAGCAAGGA GTACGCCCGC GTGTTTCAAC AAGAACACCG AAAAAACCTA

282901 ATTCAGCTCT ACGTAAGATA GCCAAAGTAC GGTTGAGCAA TCGACATGAT ATATTTGCTC

282961 ACATTCCAGG CGAAGGTCAT AATTTGCAGG AACATTCTAT GGTATTAATA AGAGGAGGTA

283021 GAGTGAAAGA TTCGCCAGGT GTGAAATCCC ATTGTATTCG AGGAGTCAAG GATTTGCTGG

283081 GAATTCCGGA TCGAAGAAAA GGCAGATCAA AATATGGTGC AGAAAAACCC AAATCGATTT

283141 ATTGATTTTA ACGATAGGAT TTCTCTATGA ATGGAAAAGG GGTGCTTCGG ATCGGGAGTA

283201 ACCACTAGTG ATAGGGGACA AATAGGGGGG AAGAACATGG GAAATGGTTT CATATGTTTA

283261 TGAGTGATTT GTTCGCGGCG GTTCAGCCGG GTATTTATAC AAGCTAGCGA GACTTCCACG

283321 TCATTGGAAC AGGGTTTTCA TTCTTTTCTA ATACCCGCGG ATGATCTTCG TGCATTAGAA

283381 GCAGGAAGCA GTCGCAGAAG TGGACTCGAT CTGTCTACCT TCAGTATGAG TCACATGGTC

283441 GGTGAGTCGG GGTTCGGCTC ACCACCATCC CCTTTTGACG CCCTGTATGA GCAGATAAAA

283501 GGTTCTGACT CTGTCAAGGC GCGGAATAGC CTGTTTGTTG GCAGAGTATT TGAAACAAGT

283561 GAAAAAGGGA CGAAGGGCTT AGTTGATAGA CTAGGGGCGA TAGAGTCGTT AGACACAGTG

283621 TCTTTAGAGC TTCATAATGC CGCTAGAATC AGATTCAAAG ACTGAAGTAG CAGCGATAGA

283681 CTCAGTGGCG AAGAGTCGTC TTTTTCCCGC TTTCATCCAT CCTCCCTTCG ATTGCGAAGG

283741 GATGAGATTT TAGGCCGGTT TTCAATTCGC TTCTCTCTCT CCGGCGGGGT TTGAACTCCG

283801 CGTGGTGGGA AGGCTTTCAC AATTCGCATC TTCCCTTCCA GCAAAGAGGG TGAAGGGGAG

283861 CGGACAGCAA GTTGGGGGAC ACTGCAGAAC CGCGTGATTG ATCCATCTGC GCTATTCCCT

283921 AATTGAAGAA AGTTGGAAAG CCTTCAAAAC CTCAGCCCCT ACCATTCTTT TTAAGAAAAT

283981 GAAAGCTGAC TAGCAATCGC TCGTTTTTCT TATTAGCATG GGATTGGATG TTCATTTAAT

284041 AATGAAAGAC ATAACATCTA TTAGAAGGCA ATCAATCCCC GGTCCTATCG ATTTTCGATG

284101 GACAACAATC CATCTTTCTC GCTTCTCCTA ATCAATCGCG AGGGTTTCTT CGGGCATGAG

284161 AACGCAAGTG CCGAAATCCA ACAAAATGTC CGAACGTCCG AGGACGAAAG AGAAAATGTT

284221 CCGCGGGGAA CTCGTTTCAT GTCGGCCTAT TCGTGCCGCT TAGACGTCGG CCATGAAATC

284281 CATCACTATA CTGAGCAGAT CACGGGCATT CACATCTCGG TCAAACAGAA CTGTGCGCGA

284341 TTCTCTCGTG AATCGCCTTC CGCAAGGTAT GGCATTCAGG GTTTGAACCC GGAGATAAAT

284401 CTTTCTTAAT AGATACAAGA CATTCGTTGC TGATCTAAAA AAAAGATCTT ATCCCGTTAG

284461 CGGGCGTTTT TCATTCTTCA CCCGGTCTTT ACTAGCGTTT ACTTTGTATT GTAAACAAAC

284521 GGTTAGTTTA CTTTGGTTTG GAAACGCGCT AAAACAGGCC TATAGGTTCG CCTTTCTAAT

284581 AGAAAAAGAG TCTATAATTA GTTAGATAGA AGTATATATA TATAGAATTA GTCAGATTGT

284641 CTGAAGCATG AACAGAATCA CCTTTGTTCC GAAGGCCAAG TCAAGTAAAG CTAAAGCTTG

284701 CCTTTTTTTT TTTCAAAGGC GGCCCCTTTC TTTCCCCGGA TCGATGACTC GCTTGTTCAG

284761 TACTGCTAAC TATTATAGGT ATAGGAGGAT GCCGTCCCCT CGGAACTATC AGTAGCTTCG

284821 GTTGTTGAAT CTAGTGCAAG TTAGGTTGTG GTTGTATTGG CCGCAAGCAG AACATAGGCG

284881 CTTTAGGCGT GCGTTGACCA TGCACTCTCG CATCGTGTAA TGTCGTATTA CTTCTATAGG

284941 TGGTGTGGTA ATTGACCTCA ATGCTAATGG TTATCCCAAA GGTTCAACGA ATGAATGAAG

285001 CTATGATCGT ACCGGGATAG AGATGATGGT CTTCCTCTGA TGTCTCCAAG CCGGCCATAG

285061 TAGAATAGAT AGGCAAAGCA GGCAATAGCA GTCTGTTCTC GCCTATCGAT AGATAGCAGG

285121 TTGCTTCCAA GCTCAAACTT AAACTGAATT GCTACTTTTT TCTTGTTATT GATAGAGTGG

285181 TATTCCCCGC TCCTGTAAAA TAAAGTAGAG GAAGAGAGAA GGTAATGTCA ATTCACTTAC

285241 TTGGAAGAAG TAAGGAAAAA GAGAAAAAAA TGAACAAGTC TAATGGGAGA AGAATGGCTG

285301 ACACGTTGAC TACCTTCAAG ACTCTAAAAA AATAGAACCC GAGCGGTCTA ACCTAACCCC

285361 CGGGGCGGAC CCTAACCGAA AGACGCTAGA CAGACTAACA GAAAGACAGT TTTTGGACAA

285421 GACAAGAAAG CAACCGTCCA TTTGCCCTCA TTTCACAGGT TGAGCGAAGC TTAGGACAGC

285481 ATTCAGAATA TGCATTTCTT ACAGTTCTTC GATTACAGCA TAGCTATCAT CAGAAGCAGT

285541 ACTTCCGAGT CACTCTATAA CTGAGAGCTT GTAGTTGGGG ATTTACCAGA TCTCTAAGAT

285601 AGAGTCTATC CGACGTATCA CCCGTAATTG GGAGTTCAAA CGAGGCCTCA ACGTAGATGC

285661 TGGATGGGAA CTTCTACCTG GCTTATTTAT ATTTGTATTT GTATCCCTAA CTAATAACCA

285721 AAGTAATTCC ACAAGAACAT GAATTACTGT TTCTATGTTG TATGACTGGA TGTGCATTTA

285781 CCTACTGACT CCATCAAAGA GTTATTTCCA AGTTTCAAGC ATATGGATGT GGAAAACGGG

285841 GCCAATGAGG TTGAAAATCT GGAATATGTG CCATTGGTAT GGTTTTTATA CGCTCTACTT

285901 CCCTATGGTC TGTTATCGAC TGAAGCCCCT TTTATTTCTT TATTTTGATT CGTATTGTAT

285961 AGTTTATAGT TGTCGGTCCC TTCCTTACGT CCTGATTCCC GTACCGAAGC TAATCCCTCA

286021 TCCTGTTTCT GAGCAAAGAC CAATCAAAGG TAATTCCTAT TTGCTTACTT GATAGAATAA

286081 GGAGCAATAG CCTTTAAATC CGAAGGTTTC ATCTCGGAAG GGGATAATGA AAGAAAGACT

286141 CAGTAACCTG GGATTAGGCC CTCTTCATGA CCAATGAGTC TCGAGCCTTT AGGCAACCCA

286201 TACGAGTCAG AGTTCCAAGC AATAGAAAAG CTCATTCCTA TGTAGTAGAA TCTCCTGCTT

286261 TTACCTAAGC ATCCGCCACC GAAGAGTTTG CTGTCGGAGG AGTCTGCCAT TGCTGAATCG

286321 CTCGCTGACG CCTCAACAGA TGCTCTCTTG CTGATCCGGG TTCTCTTGCT CAATCGTCGG

286381 CTATAGCCAT AAACATAAAT AAAAAAGTAG GCTCCATCCG GAAGTTTAAG CTTAGCCGGG

286441 GAAGTTCCCT AAATCCAATG CCAAAGACTT CTATAGCGCG CGCTTTGGCA CGTTAAGCCA

286501 ATCAACGTGA TAGGGAGAGA GGAAAGAAAA CTATGCGTTC AAGTTCCGAA CCCAAAATGA

286561 AACACTTTTC CTACAGGCAA GGGGTTCCTA TCAAAAGCCG GCCTACCAAC AACTAGGGTT

286621 CGACGTAAAA AGAGGACCCC GGACGTAGGA TTGGCTTGAG AAAGCAAGAC TAGAAGAAAG

286681 AGATTGTGTT ATAAAGGAGT AGACTGATTA TCAAAGCTCG CACGGGAATC GAGTACTTCT

286741 TAAGCGGGAA GTCTTGTTTA GTACAAGAGT AGGATCCAGT AGGGTTATAA TCTTAGTTAG

286801 CAGTCTAGGG CGATGTTTTA CTACGAAAAT AGGAGGGAAT GCGATGCTTC TTTGCCCGAT

286861 AGATGCGGAG AATCAAATCA GGGGTCAGCG CTAGAATAAG AGGGAATAGG CAGATCGAAC

286921 GAATGGTAGC AAGCCAAGCG AAGTGATCCC AGGGAATGAA GGAGATAGGT CTCACGATAA

286981 AGCATGAAGC GAGGGGCTAA ATCTCATATA GAAGAGAAGG ATCCGCCCCT TCCCTCACAG

287041 CTCCCTCTAG CCAAAGGAAA TACTTGCATT CAGCTCCAAG CGAGAAAAGG ATTGGCTTGA

287101 AAACAGCAAG AGACATTTTT CTAAGTCAGA ATGGAACGAA TATGACAAGA AGATCGATCC

287161 CGTATGGAGC CATCGTCACA GTATGTCAAG AAACCTACCT TTCCAGAGGG TTTTGCAGAC

287221 AAGCGCTTCA GGATCTTAAT TACGGATTTT CTGCTGCCCA ACAGACTTTG CTGTGCAACA

287281 CCATAGCTGT CTCGTAGGCA CCCTTTTCTT CAAGTCCGGA GACTGGATGG AGCTTTGATA

287341 GGAAGTGGAC AAAGTCTACC TAGGCTCGTT GGAGTGAGCA ACTCTCCAGA TCTATTTTCA

287401 ACTGCCATAT CAAAACGGTG CGCTTTCTAT GCTTATATAC ATACGATTTG AAAATCCAAA

287461 GCTTGGTTGG TGAAGGGAAC AAGTACTTCC CGCTTAAGAA GTCGAGTGAA CGGCACTCCG

287521 GTCAGGAGGG CGGAGCCCCA TAAAGAGTGA AGAGCGAAGC AAAGGTCTAT CCTGTAGACT

287581 GCTTTCTCTT TCTGGCTGCT ATATGTCTAA ACAGGAGAGG GTTTATGAAC GTTACAGAGA

287641 CACTGCACTA GATGCGCATG AGGGAATGAA TTGAGACTAC CACACACGAA TCCCATACCT

287701 TCTTTTCGGT GGGCAATGAA ATTCGATTGA TCTTCGGATC CCGCTCGATT GTATTGTAGT

287761 CATCGCCTTA TCCTATCTCA ATTTTTTTTA ACTGCTTACT CGGAGCAAGT GCTGAAGTTG

287821 TCTTCATTTG TGATTCCTTC CTAAAAATGA AAGTGAGGCT AAGGGATGGT TCACCATTCT

287881 TGGTGTTCTA AGGGGCATTG GCTTTGCCTT AGTTGCCCTT TCTCTCTCCT TAACCTTAGT

287941 TCAGCTAAGC TATTTCATAC CTAGTCCAAA GCGAGTGTAA GAAAAGGTCT AGCACCATCC

288001 GCCCTACCTT TCTTACTTGT AGCTTGAGTT GTTCTAACCC CTGCCGCATC AACTCCTGAC

288061 TTTATGTTCT TCCTTTTGGG TGCCGATTCC TCTCTCCGTA TACAAAGAAG CCCTTTTCGG

288121 AGTTAGGGCG GTTAGCAAGA ATGTGTTTGA ATCAATCAAG TAAGAATGCG CTCCTATTGA

288181 ATCCGCTTTT GGGAATAGAA GGGTCTTGTT AGTTGATTTT CCTTCTTAAC TTAAATAGAA

288241 GAGGCGACAA CTCCTCATCT AAGATATACG ATAAATGCAA ATCTTGCCTA TTCACCTTAT

288301 TCCCTAGGAG AAGAAAGCAT ATTCTTTGAA TCGACCAGTA GAAGAAAATC TGACTTCTGT

288361 CTTTAACTGG CTTAGCGCCT TTCATAGTCT TATAGAGTTC TTGAAAGAAG GCTAACTTCT

288421 ATTCTATTTT AGAACTTAAA AATAGACCAG CAGGGTGCTT TTTAAGTCTA AAGCAAAATC

288481 AATAGGAGCA GAAGACCTTT GTTTATATAA GAAAATTGGA GATCCTTGGA ACGTTGAAGA

288541 CCAACCCATT ACCACACTTT GATAGGTGCC ACATCCATTC CAATTCGATT TCACAGTAAT

288601 TAGCTGATCA GAACTCGACT GGTAATTGAA TTACTACTTT TAGTAAATGA AAAATAATGA

288661 AATAGATGAA GTGAAGATAA AAAAAAGCTG CAAGAAAGAA GACGTTGCAT AGTACCCAGC

288721 TGACTTACGA ATACCAGCAG CATACCTTCC ATATCGAGAT CGTGATCCAG ATCCGTATAC

288781 GAGGCTAGAA GCACCAGAGC AAGCATCAAT AGCAATTGAT CGGGAAGTCT ATCCAGTAGT

288841 AGATCCGAAT GGATCTTTTT TTAGTAGCAG CCGGCTACTT TTTTTCTCTT TTTCTTCACT

288901 TTTCTTCTTT CTTAGTTCCG GAGCGGATGG AATGGGCAGA CGAGTTGGTT CGGTTCTTTC

288961 GAGACCAAAT AAAGGGCATA GTTACCCCGC GGAAGAGGAA ATTGAATTAG AAATTTTACA

289021 TTATAACGAT AGCAAATGAG AGAAACTAGT TATCCTAGAC TAGATAGGAC GAGGGTTAAG

289081 GCTTTGTTTT GGCGAAATTG GTTCGTGTTT ACTTAATTGC TATTGTGCTT TCTGCTGGTG

289141 ACGAGACTGG AAATGGCTAG TATGAGTGAG GCAGGTAAGC AAGAACAGAA GAAAGGGAAT

289201 GGAAACCCCG CCTTTCTCCT TTAGTTTAGA GACTTTTGAG GACTCTATTA GGCTTGAGCT

289261 TACTTTTATT ACTAAAAATG AAGTGCCTTG AAAACCACTT CTTCTATTTC GAAGCTCCTA

289321 AATGCAAGCG TTATCCTATT ATAGGATAGC ACCAGTCCGC TATCTTACGC TATCGACTTC

289381 TACAAGGCAG ACTTACGCTT ACTTTGCAAC TTTTTTACCT TCTCGCCTTA CTTGATAGCA

289441 CGTGGGATTA CTAGATCCTT ACGAAAAAAA TTCCCTGGGG ATAAAATAGA GACTCACTAG

289501 CTTACAGATT AGCTCGTGGG CTGGTTTGCT TCTTGGATAC TGTTAAACCG GGTTAGAGCG

289561 CTGGATTAGC GGCTTACGGA TACGATACAA GGCAGGGTTT GAGGGCACTT AGCTTATTCG

289621 TCAGCGCAAG GCTAGTTTTG AATCACCTTC CCTACTCTCA TTACTACTGG CTTCAAAGAA

289681 AACCTTCCCC GTGGGAGAAA GAACCTTTCT TACTCTAGCC TTGGAACTCC CCGGACTATC

289741 CCCTTGGACT GAATGAGTCA CTAGCTTACT TGATTAGTTG CTTAGCTGGC TTGCTTCTCC

289801 TAGAAAGCAG GGTAAATCCT AAAAGGCATG GGAAAGGGGG AATGACTGAC TCTAGCGCAA

289861 GCACTTTCCT TATCATATCC TTATTCTAGT TTAACCTTAT TTCTATCCCA ATCTCAGGGG

289921 ACTTCCTTCA ATTATCATAT CCCGACTCTC ATTCCCAAGC TGGATACAGC GAGGGGATAG

289981 CGGGTTCTCC GAATTCTATT GATCATCTTC ATCAAAGGCT AAGTGGCGCA GAGCTGAGCT

290041 TTACCCGTAG GGCTCAGTAT CGAAGACAAC ACCGCTAGGC TAAGTTAGAC AGAGCTTCAT

290101 AATGCCCCTA GGGCTCAGCT CAGTTTGGTC AACAATGTCT TTTCCGATCA ATTGGAAGCA

290161 TACATAGACG ATAGCAAGGT AGTTGATTCT CACATTGACG ACTTGAGAGA AACCTTCACG

290221 GCACTCCGAA AGCACAACAT GAAGCTTAAT CCGGGTGACG AAGGGGAAAT TTCTGTTGAT

290281 CGATGAAAGG GGAATAGAAG CCAATCCAGA TAAAGTCCAG GCTGTCATCG ACATGAAGGC

290341 GCCGACCTGC GTAAAGGAAG TCAAAAAATT GACATTGTTG GGAATCTCGC TCTGGAGACA

290401 AGTGCCATCA TTTCTTCAGC ACTATAAGGA AAAAGGCAAA GTTCGAGTGG ACGCCGGAAG

290461 CCGAGGAGAA TGCGTTCGGC CTTTTGAAAG AACCTCCCGA GGTTGATCAG CCCTTTGCCG

290521 GAAGAAACAC TCTATGTTTA CTTGGCAGTA TCTGACATTG CCGTTTCAGC TGTCCTCGTT

290581 GCTGAACGAA GCGGCATTCA GATACCAGTC TACTTCATTA GCCATGTACT GCAGAATGCC

290641 GAGATCAGAT ATGCGACAAT AGAGAAGTTC GGCCTTGCTT TATTCATGGC TAGCAAGAAA

290701 CTTCGGCTGG CTCACAAGCT GGTTGTTTTA ACAGAGCAGC CTATCAAGCA GCCGTTGTCC

290761 AAGATGGAAT CCTCAGGCCG TATGCTGAAA TGGGCAGTTG AATTACTTTG ACATCACCTA

290821 TGAGCCGAGA AGGGCCATAA AGGGGCAGGC ATCATCGTGG AAACTACTCG GCCTCAATGT

290881 CCGGCTCCAA AGAAGACACA CTGGACCCTC TATGTTGATG GGTCGTCAAC ACAGAACGGG

290941 TGCGGCGCCG GCATTATCTG TCAGTCTCCT GAGGGGGACG TTTATGAATA TGCCATGAGG

291001 TTCCAATTTC AAGCCTCAAA CAATGAGGCC GAGTATGAGG CTCTGCTAGC CGGGATCCGC

291061 ATGTGTAAGG CCGCAGGGGC AACCAGGCTG GAGGCCGTCT CCGATTCGCA GTTGGTGGTC

291121 AGTCAGGTGA ATGGCCAATA TGAAGCGAGG GAAACGGCTA TGATAAAATA CCTCCAAACC

291181 CTGGAAGAAT TCTCCCTCAG CGGGCCGAGA ACAACCAAGC GGATGCCTTA TCCAAGCTTG

291241 CCAGCTCGGC AACCAATGAT ACTCCTCGGT CTGTGTTCTG GGGGGTCAAG GATAAACGGA

291301 GCATTGAGGC CGAGGAAGAA GTCAATTATA TTGACAGAAG GATGAGATTT TAGCATACAA

291361 GGCCGACGGT ACTCTGCCAA GTGATCGGCA AAAAAGGCGA TACGTCAAGT CCCGAGACAA

291421 GTGGTTCGTG GTGTGGAATG GTCTACAATC AGTCTTTCTC ACGGCCGTTA CTGTTCTTGA

291481 AGATCTGCAC GAGGGGCATT GCGGCTCCCA CATTGGGGCA GCTGCACTAG CCGAGAAGGC

291541 ATTTCGAACA GGATACTTCT GGCCTACAGC CCGGCAGGAT GCCAAGGACT TGGTGCAAAA

291601 ATGCAAGAAA TCCATCAGAG GCCGGCCAAC TATTTAAGTT AAGGCCCCGT TCCACTAGAT

291661 GAGAGGAAAG AATCTTTCGC TTATGTGACT ATAGGTCTTT TCCCTGGAGG CAATAATGTC

291721 TAGGACCTAT TGTATTGGGT ACAAGAGTTA CCAGATGAAT CGAAAGCTCG AAAGAGCAAA

291781 AAACTTATTT AGAGAAAGAA TGATTAAATT CTTTACTTAG CCTGAAGGGC AATAAACGAG

291841 AGACTGAAAA GGAAGGTACC TCGAAACAAA AAGAAGGAAC TCTAGCATCG GTCTATCGCT

291901 ATACTAGGAG GGTTGATAAA TATAATAAAA TCGGTGGTAG GGATATAAAT GATTTTAGAG

291961 AGGGGTATAA AGGTGTGTTC ACTAAAAATG AGATCCTAAT TGCTATAAAT TCTAATATCC

292021 CCGATCACGT GCTAAATAAT AAAAGAAAGC TTGAAACATG GAATACTAAG CGGGATAAGC

292081 TCGCTGATTG TTATCAGAAA TATAGTCAGA GAGTGTGCGG TGGGAGAAAC ACATGGGAAG

292141 GCCATACGCT TATGTGGAAT AAATACAAAA ATCAACTCAG AGGCCCTTTT TTTATTCACT

292201 CATGATAGCC AGATTTGATC TGGGGTGTCG CCTGTATAGG AGATTTTCGG CAGGAAGAGA

292261 AGAAGCTCCT GATAAGGATG GTTCAAGGTT TTGTAGGGTC GAAGATTCAA GTCTAGTATA

292321 GACGCTCGCG GGGTCGATAG AGTCAAGCCG ATAGGCGCAG GAGCGGCAGA GCTGAATAAC

292381 GCCCATAGGG CTCAGTATCC TTGGAGACAA ATAGCGCAGA GTATCTACGC CTGATAAAAG

292441 CCACGATATC GATTGTAGTT GAGGTATCAC ATTAATTGCT ATTGGAATTG AGGCTACTAC

292501 GAAATATTTA CTCATGGGTG GGGCAAGCTC TTCTATTCTG GTTCATGGTT TCTCTTGGCT

292561 ATACGGTTCA TCCGGTGGAG AGATCGAGCT TCAAGAAATA GTGAATGGTC TTATCAATAC

292621 ACAAATGTAT AACTCCCCGG GAATTTCAAT TGCGCTTATA TTCATCACTG TAGGAATTGG

292681 GTTCAAGCTT TCCCCAGCCC CTTCTCATCA ATGGACTCCT GACGTATACG AAGGAGTGCG

292741 GTTCGTTTGA GAAATTCCTA CCTCTCTATC TATCTCTGAG ATGTTTGGAT TTTTCAAAAC

292801 TCCATGGACA TGCAGAAGAG AAATGCTATT CCCACTCAGA CCAAGACATA ACTTTTACTT

292861 GTTCAAATAA CAATTAAGGT GAAGCAGGGT CAGGAACAAC GAATCTCTTT TCTTTATGAT

292921 ATCTATTTTG CAAGTTCGTT ATTACGGGTA GTTCCTACAA AGGATCGGAC TAATGACGTA

292981 TACTTGAATT CTCGACGTAG ATGCTACATA GTGGGTTCTC ATCCTTCAGA GACTACGAGT

293041 GTAATAGGAA CATCCGTCGA CAAAAGGATC ACCCTAAGAT GATCATCTCA TGGCTATTGA

293101 GAACGAATCA AATCAGATGG TTCTTTTTTT CAATCTTTTC GATCTTGGTT CCGTAGGAGC

293161 AAGTCAGAAA GATTGAAAAA ATCAGTCATT CGCAACCACT GATGAAGGAT TCCTCGAAAA

293221 GTTAAGGATT AGTAATCTTT TTTCTAAATC GAACGGATTC GGTCTTATAC ATACGCGAGG

293281 AAGGTAATCA AAAAAGAAAG AAGAACTCAT CTTCTTTCTT TTATCACTTA GGAGCCGTGC

293341 GAGATGAAAG TCTCATGCAC GGTTTTGAAT GAGAGAAAGA AGTGAGGAAT CCTCTTTTCG

293401 ACTCTGACTC TCCCACTCCA GTCGTTGCTT TTCTTTCTGT TACTTCGAAA GTAGCTGCTT

293461 CAGCTTCAGC CACTCGAATT TTCGATATTC CTTTTTATTT CTCATCAAAC GAATGGCATC

293521 TTCTTCTGGA AATCCTAGCT ATTCTTAGCA TGATATTGGG GAATCTCATT GCTATTACTC

293581 AAACAAGCAT GAAACGTATG CTTGCATATT CGTCCATAGG TCAAATCGGA TATGTAATTA

293641 TTGGAATAAT TGTTGGAGAC TCAAATGATG GATATGCAAG CATGATAACT TATATGCTGT

293701 TCTATATCTC CATGAATCTA GGAACTTTTG CTTGCATTGT ATTATTTGGT CTACGTACCG

293761 GAACTGATAA CATTCGAGAT TATGCAGGAT TATACACGAA AGATCCTTTT TTGGCTCTCT

293821 CTTTAGCCCT ATGCCTCTTA TCCCTAGGAG GTCTTCCTCC ACTAGCGGGT TTTTTCGGAA

293881 AACTCTATTT ATTCTGGTGT GGATGGCAGG CAGGCCTATA TTTCTTGGTT TTAATAGGAC

293941 TCCTTACGAG CGTTCTTTCT ATCTACTATT ATCTAAAAAT AATCAAGTTA TTAATGACTG

294001 GACGAAACCA AGAAATAACC CCTCACGTGC GAAATTATAG AAGATCCCCT TTAAGATCAA

294061 AAAATTCCAT CGAATTGAGT ATGATTGTAT GTGTGATAGC ATCTACTATA CCAGGAATAT

294121 CAATGAACCC GATTATTACA ATTGCTCAGG ATACCCTTTT TTAGCTTCTA GAGTCTATTT

294181 CTTAGTTCAA GATCCCTCTT ACTAACTGGA ATCAAAGAAT TAGTAGATCT GTTCGTTCCG

294241 CCCAAAATGG GAATGGGCTA GGGTTATGAA CTTATAATCT AGAATCTGAT GATCGAGTCG

294301 ATTCCATGAT TATAAGTTCA TTCCATACCG GACCCGAATA GGGTTATATA CATGCTCATT

294361 ATGAGAAGGG GTCATTCGAG CGTATCTAAA TAGATACTAT GTTTACATAT GGATCCCCGC

294421 ATTGTTCCAT TCCATCTAGG ATTAGAAATA AGCGAAATCG GACCTGCTTT TTACATCTCT

294481 CGTTTTTTGG GACCCTATTT ATCTCTTTAG GCTTCTATTG AATCGAAAAA TAGGTTTGAT

294541 TGTCCATCCT TTTGATATAT ATAAGTATAA GGTATCCTCT GGATAATTCA AATCGAAGCA

294601 ATTGGAGACC CGGGCCTATA TGACCGATCC ATAGAAATAC TCAAACACTC GACCTTTGTT

294661 ATATATTCCA TACATCACAC TAGATAGATA TCATATTCAT GGAATACGAA TCACTTTCAA

294721 GATGCCTTGG TGGTGAAATG GTAGACACGC GAGACTCAAA ATCTCGTGCT AAAGAGCGTG

294781 GAGGTTCGAG TCCTCTTCAA GGCATAATAT TGGAATTGGA ATAAGTTCGG CAGCGGATCA

294841 CGAAATCTTG GTGATCTTCT CTATCTAATG AAAGGGGAGT CCACTTTGAA ATCGTCCGCC

294901 CGCCCTGCGC CCACCCCCCC GAGTATATGC TTCAACAGGA ATCGCACAAG GGGAGATTGA

294961 TACAATAGAA ACCTCTGGTA CTGGTCAAAT GCCTGCCCGT AACGTAACTC CGCAGATAAA

295021 TTACATAGTC CGTTTTAGGG ATTGGCGACT TACCCATTCA GTGACTTTGG CACTGTACGT

295081 TCCCAAAATG GGCACTATCG GGTCGGATGA ATTCAATAAT AGACACCTGT TGGCATTCCA

295141 GCCTTCCCTC TACTTTCAGG GCCTATCCGA AAGAGAATCC AGTACTTCTT GGTCGTGAAT

295201 ATCTGAATAA ATAGGACGAA CCAACGGCCC CGTGGATATC GTTGCTTCGG AACAAAACAA

295261 TGAAAATTAG GCTCGGTCAA CTGGAATGTG TATTATCCAT AATGTGTATT ATCCATATAG

295321 GGTATTTTTT TTCTATTTTA TTTAGTTATT CAGTCAAACC AATGATTCGT TATTGGAGCA

295381 GATAGCAACA ACTATTTCAT CAGACATGCG TATTTTTGCT TTTCCAATGG ATTTACATCT

295441 TTCATTAATG GAAATTTTTG GATGTAGTAA GTAATAGGCT CTGGTTGTTC GCTGTTCAAG

295501 AATTCTTGTT TAGGCAGTTC ATACCATCCA TACATAGTGT TTTGATCTAA GATTTCAATT

295561 CTTCCATGTT TCAGCAGTAG CATATTGTTC CATGGAGCTA AGGTCCGAAA TATGGAAAAA

295621 CAAGTGTTTC CACAACTCTA CCACCCAGTC AATTCGGTTC CACGTAATCC CCCTTTCATG

295681 GCCACATATC TTTCCGGCTA AGGAATGGGA AATCTTTCTC CTCTTGCATG AATCCAATTT

295741 TCATTTCATC CGGGAAAAGC CATCTTTTTC TCAACAATGT CTTTGTCATT TGATCCAATC

295801 GTGTTCCGTT AGATAGGAAC AGATTTGATA AATACTGATA ACTCTCGGAT AGAGTATTAG

295861 AACGGAAAGA TCCATTCGAT AATGAACTAG TGGTTCTAAG CCATCTCTGG CGATTAATCA

295921 ACAATTCAAA GTGCCTTTCT TGCGTATTCT TGATAGAAAA GCGTTGAAAT AGAGATATAG

295981 GAGTATTCAT TTGGGAAGTA AGAAGCCCCT TTGATATCTC TTCATCTGCA AACAATTCTC

296041 GATGGGAAAA CACAGAGACA AAGGGCTGAT CTTTGAATAG GAAAAAGAGT GGATCTGCGG

296101 GGTCCCAAAA GAATTGGCTT ATTCGAAAAA AGCCCTGTTT TTTGGAAGAT CTATCTCGTG

296161 TCTGGTACTG CATGGTTCCA CTCTGCAAGA ACTCCGAATC ATTCTTTTGA AGCTCATCCT

296221 CTTTATCATA AATGATCCGC TTGCCCCGAA ATGACCTGGC CCAATAGGGA AATCCCAATT

296281 CATTGGTCCT TTCGATACAA TCAAATAGAA AGCCCCAGGG GTTCCATACT CTAGGAGCCC

296341 AAACTATGTG ATTGAATAAA TCCTCCTCTA TCTCTTGCGG ACCGAGGGAT CCTTCCCCTT

296401 TTTCCAATTT GTATTTTCGA TAGAGAAATC TATATCTACG ATCAAGGATA TAAAAAGATC

296461 CCTTTTGCAT CATATCTAAG GGATTCCTTA GTTCGGGCCG AAGAAACAAT GTCACTCGAT

296521 CATTCTGACT GCAATCTTTT TCTGTCCGTG AGGATCCCAC CAGAGCGCCT TCTACTTCTA

296581 ATAGGCCATG AACTAGAGAA GAATCATTCT CAACGAGTCC ATAAGAAGTG ATCCTATTTT

296641 TTTCATCGGG TAGAGACCAA AGATCTTGAG CGACCGATCC GGCAGAACAA CTCAAAAGAT

296701 AAAGAAGTAT CGTTAATTTC TTCATGCTCG TTCCAAGTTC GAAGTACCAT TTGTACAAAG

296761 AAGAATCCCC TTCGTTACAT GATTTCTTCT TCATATAGAT AGATATAGGA TCTATAGGGC

296821 AATTACTTAG AATTACATTT TGTGCAACAG CCCTTCCTAT CTGATAGAAA AAGATCCCAT

296881 GATCCTGAAC CGAGCTTACC TGGGATCGCA AATCCCAAGT TTGTCTATGA AGAGCGGATC

296941 GAATTGTATT AGTGTCTAGA ATGGGTTTCT TCTGTGTAAT ACTAACCGAT AGGGCCTCAT

297001 TGATAAGTGC TACAAGATCT CGTACATTGG AACCCATGGT TATGGTTATG GACCCGAATC

297061 CATTAGTATG GAACATTTTC TTTTCCAAGT GAAATCCCCT AGTATATGAA AGAGTGAAAA

297121 AGTGCTTTCG TTGTTGTGGA ATACGAAGCC TTCGTATCTT AATGCATGTA TTGAATTGAT

297181 TCGGAGCTAT TAGAGCGGGA TCCACTTTTT GAGGAATATG AGTCGAAGCA ATAACAAGAA

297241 TATTTCTAGT AGACCATCTT TCACAATCCC TGGAGAGATA GTTCACTAAT AGACCGAGGG

297301 ATAAGTAATT CGACTCATTC ACATCCAGAT CATGAATGTT TGGAATCCAT ATTATGCAAG

297361 GAGACATTGC TTTTGCTACT TCGAATTGAA GGGTGATAGA AAATTGGTCG ATTTCCGGCA

297421 TCATATCTAT AGTTAGCGCA TTCATCCTAG TTAGCAGCTC CAGCTCCGTA TCAAGGTCAC

297481 AATCGATATC GTCACTAGCA TCAATATCGT CACTAGCATC AATAAGAGAA CCTTGAGACT

297541 TGTTATCCAG GAAGTTGTTC AGAAATACCG TAATAAAAGG AACATAGGAG TTTGTCGCTA

297601 GGTATTTGAC CAAATAGGAT CGTCCAGTTC CTATAGAACC TATTACTAAA ATACCTCTAG

297661 AGGGGGGTAG GGATAAGCGG AGCGAAAAAG GTTTTCCATG AGATGGGAAA TGAAAACTAT

297721 TAGCCCCACA CGGGGTTTGT GAATAAGTGA TTGTCTGATA ATGAGCAAGG AATACTCGTC

297781 TTTCTGCTAA ACAAGATGTA TTGAACTCAT AATTCATTAG ATACTTTTTA TGAATGTCAA

297841 CTAAGTATCG TAAGTAAATT GCTCCCGGTT GTTCAATCAT TTGATAACCA GAGTCATTCT

297901 TTGATAAATG ATCACTATGA GTCAGACTCA ATAGAATTTG ATCAATCCTT TTTTCGGTCG

297961 TTAAAGTGGA GAACTGAACC AAGAATTCTC TTTCTTCATC ATCAATCGAA TCACTGCTCG

298021 CGACCCAGGA TTCTATTTTC TCATCAATCC AATCACCGTT CACCCTTTTT CTTTTTCTTA

298081 TCAATGAATA GATCTCTTTA CTTGTATGAC TTAGATGTAT CGTATTTCTC GAAAAAGTGA

298141 TTCGATTGAT GGGATTTGGT ATGATACTTC TGAAATCGAT GATATCGATG ATATCGATGA

298201 GATTAATATT CAAATCTTCT TTCTTAGAAT TGAACCCATA AACGGAACCA CCACCCACTA

298261 GCATGTTGTC GCCAGAAGCA GAACCCCATA TTTCTTCTAG GAAATCTCCT AATTGTTCCC

298321 CTAATTGTTT CAAAGCAACC AAAAAGAGAT TCTTTAAGGA ATTCGGTTCC GATGTAGGAT

298381 ACCTATCCAG AAGTTTTCGA AACTCAATCA TGTATGCTGG AATCATCCAA CATTTGACCT

298441 TTTCGAACTC TGTCTGTAAC TCACTAGAGG CTCGGAAAAA AAAGAGAAGA TGTGTACGAA

298501 CGAGATATCC AGCAACAAGA AGAAGGAAAA GGATTGAATA GAAGAACTCC CGAACATTTG

298561 GCGATCCCAG ATGTGTCCAT ATCAATGGTG ACTCATTATT TCGATGAATC TTTTCTTCGG

298621 ACAGAAGAAG ATTATGTAAA CACTTACTCG AAATCTCACT TATCAGATTC CATTGTGTCT

298681 TCCACAATTT TTTCTGAAGA ATTCGCCATG ATATATCTGA TCCGTGCATA ATATCATGAA

298741 GAATAGATAA AAATTTTGGA CTGCTACTTA GTATCGGCAA TAGGTCTGAA AAAGTATCTA

298801 AAAATAAAAA ATTTAGATAT TTGTACCCTG TCGACGTAAG GAACCATGGC ATATATGTTT

298861 GGAATAGATT CCATTTTGAG AGAGTTGAAA AAGCACTATC TCGTTGAAAG GTTCTATACA

298921 TCTGCCCTTT CTCAACGCAT TTCTTTAGAC AAAGACTCTG TTTTTTCCTC TTTTCTGATA

298981 GTAAATATTT CTCAGAACAT GGAGTGTAAA TAAAACTCAT GTTTGAATTG AAATTGAGAT

299041 ACTGATGCAA GTTCTTCCTT TCTGAATCAG ATAGATTCAT ATTGGAAAGA GGTTGACAAT

299101 AAGTTCTTTC AAAATGGACT ATTTGTCCCT CTGTTAGAGG TGTTCCAGAA ATGTCTGCGA

299161 TCGAGTAAAT AGTTCTACGA ACGAATAGAT TGGATCGAAT TGGAAAATCG TTAGGTATGA

299221 ATATGTTAGA TACCTGTGAC TCGATTGGTG AAATAGTATC TCTCTCCAAA AAAGCATGTT

299281 TTTTTTTACC GACACAAAAA GAAAATATTT TGTTGTGAAT GAACAAGATA TTGAGGAATT

299341 GTCTATACGT AAAATCATAA TTATTGATAC GGGCCTTTTC CATATAAAAA GGGAATCTTT

299401 TGTTACAATA GAAGCAGAAG TGATGTGGAT TATTCAAGAA TCGAAGTCGA TTTGCTTTAT

299461 AAAAAGAAGA TATCAATGAA CTTCTATGAA ATGATTTTAC GGGATTCAGC CAATTTTTTT

299521 GATCGTGGGA TATCATTGAG AAATAGGAAT CCGTGTTATC AAAGGATTTC CCGCGGCGCA

299581 GCAGTTCTTC CATACCAACT TATCTTTCAT CCTCAGAACA GATTGCAGAT GTGTTTACCA

299641 AGAGACTTTC CACTGCTCAG CACAACACCT TATTAGGCAA GCGGGGAGTT CAGAAATCTC

299701 CACACTCCTG GCTTGAGGGG GAGTGTTGAA GCAGCCTCAC AGTTTGTAGG AAATGAAAGC

299761 ATGTGACAGC AATTCTCTTT TTGTCTGTTA GCTCTCTGAG CTTTCTTTCT TTTATTGGTT

299821 AAGGTTTGTG TGAATCAGCT TAGTTAGGGA AAAGTGTCAT GTGAGGGGTA GGTGAAAGAT

299881 AGGGGAGCTG TCGAATGTAA GAAAGACGTA TTGCCAAGCC TTTCTTTATG ATCATATGGA

299941 TCCCTTTTCG TTACTTTGCT TTCAGGCTAC TCTAATATCA TAAGAGAATC AAGGTGACCA

300001 AAGGCTACCA ATTGGAGAAA CGAAGAAGCA GAATAGCTAG TTTTGAAAGG GTATCGAAGA

300061 AAACGAGTCC GGAAGGTATA GCCAATAAAG AAAAGAAAAC TCCTTCTCGC TAACGTAAGC

300121 CAAGCTTAAG CCTTCAACAG CTCAGAAGAA AAGAGTCTTT GTGTAAGGTT AGCCTAGCCG

300181 AGCGATAGAA TAGAGAATAG AGAATTAAAG GTATCTTATG CTTCTATACT AGATAGCTCT

300241 AGTCTATTAA ATTAAGCTGC CTCTATACGA CCCAACCTTC CTTCTTCTTT CTTGTTCGAG

300301 TCGCAAGTGT TATATGAAAT GAAATTGAGA AAAAAAGTAG AATCTTACGA AGTAGAAATA

300361 TCTATCTCTT ACGACATACA TTTAAGATCG TCAACGAAAA GTTTCCTCCG ATCCAGGTTA

300421 AGGTACGTAA AGGTAGAATA AGTAGTCAAA AATCTCGTAA GAGAAAGAAG ATCTAACAAG

300481 CAGAGGAGAT GCGCAAGTAA GGAGAAAGAT CAAAAAGCTA ATGGATAGGA ATGGACGGAA

300541 GGCTTCTGAT CTTAGCTCCT GCGCCTTTCT CCTAGATCTG ATGTTCGATA GTCAAAAAAG

300601 CTCGTAAGAA ATAAATAATA TACCATGAAA CACAATTTCC GTTTCCTTAC TCAGGGTATT

300661 CCATTTACCC AGAAAAGGCA CTTGTATTCA AGTCCTTTTC CTCTATGTCT CTCTTGTTCC

300721 GTGAAATTTC AGGTTGTTTA TGACATGACA TTTATTCGTT CGTATCTTGG TTCTCGCTTT

300781 TCTGCTAGTT TTATTTCTGA TAGTTCGCAT TCTCAGATTC ATTATGGTCA TTACTATACT

300841 ACTACTACTT GTACTTGGCG TCAATCGCCT TATGGCACTA CTAGTTCTAA GAGTTGTCTT

300901 TCTGCAAGTT CGCAGAATTT GAACCGTTCT GCTACTGCTA TTTCCTCAAT TCGACGATCT

300961 TATACTACAA AAAGAATTAA GAAATTCTTT CAACAGGAAA TGTTTTTATT TCATAATTCT

301021 TACTATTCTA TTGAACAAAT TTCTTTACTA ATTTTTGCCT TACTTCTTTT TATTGGGATT

301081 ATTGGGTTTA TTTTGGGGAT CAATCCCGGC GTCTATTTAT TTAGGAAGGC CCTCCTTTTT

301141 TATGTTATTA AATCCGTTCC AGGCCCTTTA AGTGGAGCCC TCAGGTTCTG TTTGAGTTTC
[truncated: 213,534 more chars]
